# Supplementary material for: Embedding material graphs using the electron-ion potential: application to material fracture
Source: Royal Society of Chemistry journal article supplement (doi:10.1039/d4dd00246f), 2024-01-01
Supplement: d4dd00246f1.xlsx [file d4dd00246f1.xlsx]

## Sheet: Triaxial strains
structure	DFT Total energy/atom	DIEP Total energy/atom	DIEP Abs(error)	structure	DFT Total energy/atom	M3GNET Total energy/atom	M3GNET Abs(error)
VASP_strain_mp-1001834_1x1x1_-0.01_-0.01_-0.05.vasp	-9.82059	-10.1738	0.353168	VASP_strain_mp-1001834_1x1x1_-0.01_-0.01_-0.05.vasp	-9.82059	-10.0077	0.187113
VASP_strain_mp-1002069_1x1x1_0.02_-0.01_0.05.vasp	-3.10304	-3.1072	0.0041609	VASP_strain_mp-1002069_1x1x1_0.02_-0.01_0.05.vasp	-3.10304	-3.08755	0.0154848
VASP_strain_mp-1002115_1x1x1_-0.04_0.02_0.02.vasp	-5.86232	-5.88631	0.0239887	VASP_strain_mp-1002115_1x1x1_-0.04_0.02_0.02.vasp	-5.86232	-5.8979	0.0355728
VASP_strain_mp-1002224_1x1x1_0.03_-0.05_-0.03.vasp	-5.96007	-6.06581	0.105748	VASP_strain_mp-1002224_1x1x1_0.03_-0.05_-0.03.vasp	-5.96007	-6.05758	0.0975083
VASP_strain_mp-1007693_1x1x1_0.03_0.04_0.04.vasp	-10.872	-10.4132	0.458821	VASP_strain_mp-1007693_1x1x1_0.03_0.04_0.04.vasp	-10.872	-10.6645	0.207501
VASP_strain_mp-1008554_1x1x1_0.05_-0.04_-0.04.vasp	-5.18604	-5.39801	0.211961	VASP_strain_mp-1008554_1x1x1_0.05_-0.04_-0.04.vasp	-5.18604	-5.36715	0.181106
VASP_strain_mp-1009077_1x1x1_0.01_-0.03_0.03.vasp	-5.79996	-5.8057	0.00574335	VASP_strain_mp-1009077_1x1x1_0.01_-0.03_0.03.vasp	-5.79996	-5.80814	0.00817934
VASP_strain_mp-1009132_1x1x1_-0.02_-0.04_0.05.vasp	-5.42978	-5.48244	0.0526537	VASP_strain_mp-1009132_1x1x1_-0.02_-0.04_0.05.vasp	-5.42978	-5.46857	0.0387905
VASP_strain_mp-1009583_1x1x1_-0.01_-0.05_-0.04.vasp	-5.71983	-5.93105	0.211213	VASP_strain_mp-1009583_1x1x1_-0.01_-0.05_-0.04.vasp	-5.71983	-5.94527	0.225441
VASP_strain_mp-1009655_1x1x1_-0.02_-0.02_-0.04.vasp	-6.01454	-6.73887	0.724329	VASP_strain_mp-1009655_1x1x1_-0.02_-0.02_-0.04.vasp	-6.01454	-6.54066	0.526114
VASP_strain_mp-1017544_1x1x1_0.05_-0.05_-0.04.vasp	-9.15557	-9.36465	0.209077	VASP_strain_mp-1017544_1x1x1_0.05_-0.05_-0.04.vasp	-9.15557	-9.29157	0.135999
VASP_strain_mp-1018023_1x1x1_-0.02_0.02_0.01.vasp	-7.40355	-7.38787	0.0156809	VASP_strain_mp-1018023_1x1x1_-0.02_0.02_0.01.vasp	-7.40355	-7.5463	0.142751
VASP_strain_mp-1018030_1x1x1_0.01_-0.05_-0.01.vasp	-5.28395	-5.43762	0.153663	VASP_strain_mp-1018030_1x1x1_0.01_-0.05_-0.01.vasp	-5.28395	-5.3694	0.0854458
VASP_strain_mp-1018045_1x1x1_-0.03_-0.05_0.01.vasp	-0.872713	-0.874878	0.00216446	VASP_strain_mp-1018045_1x1x1_-0.03_-0.05_0.01.vasp	-0.872713	-0.960769	0.088056
VASP_strain_mp-1018071_1x1x1_-0.04_0.04_0.04.vasp	-7.54794	-7.48874	0.0591933	VASP_strain_mp-1018071_1x1x1_-0.04_0.04_0.04.vasp	-7.54794	-7.49258	0.055359
VASP_strain_mp-1018146_1x1x1_-0.04_-0.03_0.05.vasp	-7.80566	-7.81896	0.0133045	VASP_strain_mp-1018146_1x1x1_-0.04_-0.03_0.05.vasp	-7.80566	-7.84441	0.0387527
VASP_strain_mp-10192_1x1x1_0.04_-0.01_-0.05.vasp	-6.46779	-6.57227	0.104489	VASP_strain_mp-10192_1x1x1_0.04_-0.01_-0.05.vasp	-6.46779	-6.53898	0.0711984
VASP_strain_mp-10287_1x1x1_0.03_-0.03_-0.04.vasp	-4.50538	-4.53333	0.0279491	VASP_strain_mp-10287_1x1x1_0.03_-0.03_-0.04.vasp	-4.50538	-4.54137	0.0359844
VASP_strain_mp-1038934_1x1x1_0.02_-0.02_-0.05.vasp	-2.54958	-2.65079	0.101207	VASP_strain_mp-1038934_1x1x1_0.02_-0.02_-0.05.vasp	-2.54958	-2.6248	0.0752134
VASP_strain_mp-1039019_1x1x1_-0.02_-0.04_0.02.vasp	-2.56477	-2.64621	0.0814401	VASP_strain_mp-1039019_1x1x1_-0.02_-0.04_0.02.vasp	-2.56477	-2.66698	0.10221
VASP_strain_mp-1039106_1x1x1_0.04_-0.03_-0.05.vasp	-3.76071	-3.82567	0.0649615	VASP_strain_mp-1039106_1x1x1_0.04_-0.03_-0.05.vasp	-3.76071	-3.81228	0.0515644
VASP_strain_mp-1039164_1x1x1_-0.02_-0.01_-0.01.vasp	-1.19023	-1.22477	0.0345399	VASP_strain_mp-1039164_1x1x1_-0.02_-0.01_-0.01.vasp	-1.19023	-1.24112	0.0508843
VASP_strain_mp-1059160_1x1x1_-0.04_0.02_-0.04.vasp	-2.08853	-2.06905	0.0194884	VASP_strain_mp-1059160_1x1x1_-0.04_0.02_-0.04.vasp	-2.08853	-2.25513	0.1666
VASP_strain_mp-1062984_1x1x1_-0.02_-0.02_-0.02.vasp	-7.00171	-7.14134	0.139627	VASP_strain_mp-1062984_1x1x1_-0.02_-0.02_-0.02.vasp	-7.00171	-7.15173	0.15002
VASP_strain_mp-1063118_1x1x1_-0.05_0.02_-0.04.vasp	-5.85116	-6.09564	0.244477	VASP_strain_mp-1063118_1x1x1_-0.05_0.02_-0.04.vasp	-5.85116	-6.06495	0.213792
VASP_strain_mp-1063522_1x1x1_0.04_-0.02_-0.04.vasp	-5.92802	-5.9821	0.0540764	VASP_strain_mp-1063522_1x1x1_0.04_-0.02_-0.04.vasp	-5.92802	-6.04343	0.115415
VASP_strain_mp-1064307_1x1x1_-0.05_-0.01_0.04.vasp	-2.9995	-3.2352	0.235705	VASP_strain_mp-1064307_1x1x1_-0.05_-0.01_0.04.vasp	-2.9995	-3.27419	0.274692
VASP_strain_mp-1064706_1x1x1_-0.01_0.02_0.03.vasp	-9.25431	-9.17322	0.0810892	VASP_strain_mp-1064706_1x1x1_-0.01_0.02_0.03.vasp	-9.25431	-9.05099	0.203324
VASP_strain_mp-1064719_1x1x1_0.04_-0.05_0.01.vasp	-5.51405	-5.49236	0.0216894	VASP_strain_mp-1064719_1x1x1_0.04_-0.05_0.01.vasp	-5.51405	-5.56881	0.0547668
VASP_strain_mp-1065250_1x1x1_0.02_0.01_0.05.vasp	-3.75014	-3.68877	0.0613744	VASP_strain_mp-1065250_1x1x1_0.02_0.01_0.05.vasp	-3.75014	-3.78316	0.0330163
VASP_strain_mp-1065540_1x1x1_0.04_-0.03_-0.02.vasp	-5.15859	-5.18632	0.027728	VASP_strain_mp-1065540_1x1x1_0.04_-0.03_-0.02.vasp	-5.15859	-5.27144	0.112844
VASP_strain_mp-1067281_1x1x1_0.05_0.04_0.03.vasp	-1.97585	-1.89924	0.0766045	VASP_strain_mp-1067281_1x1x1_0.05_0.04_0.03.vasp	-1.97585	-1.7782	0.19765
VASP_strain_mp-1067880_1x1x1_0.02_-0.04_0.05.vasp	-2.88797	-2.88447	0.0034966	VASP_strain_mp-1067880_1x1x1_0.02_-0.04_0.05.vasp	-2.88797	-2.8708	0.0171722
VASP_strain_mp-10753_1x1x1_-0.02_0.05_0.02.vasp	-4.34059	-4.3856	0.0450114	VASP_strain_mp-10753_1x1x1_-0.02_0.05_0.02.vasp	-4.34059	-4.26822	0.0723702
VASP_strain_mp-10756_1x1x1_0.01_-0.03_0.03.vasp	-6.72347	-6.69072	0.0327474	VASP_strain_mp-10756_1x1x1_0.01_-0.03_0.03.vasp	-6.72347	-6.62373	0.0997343
VASP_strain_mp-1080294_1x1x1_0.05_-0.03_0.05.vasp	-5.21082	-4.85024	0.360579	VASP_strain_mp-1080294_1x1x1_0.05_-0.03_0.05.vasp	-5.21082	-5.16301	0.0478106
VASP_strain_mp-1092293_1x1x1_-0.02_-0.02_-0.02.vasp	-4.80836	-4.89057	0.0822104	VASP_strain_mp-1092293_1x1x1_-0.02_-0.02_-0.02.vasp	-4.80836	-4.88459	0.0762337
VASP_strain_mp-1093581_1x1x1_-0.02_0.01_0.05.vasp	-2.84462	-2.84969	0.00506744	VASP_strain_mp-1093581_1x1x1_-0.02_0.01_0.05.vasp	-2.84462	-2.84958	0.00495461
VASP_strain_mp-1093613_1x1x1_0.02_0.02_-0.04.vasp	-2.07405	-2.09734	0.0232891	VASP_strain_mp-1093613_1x1x1_0.02_0.02_-0.04.vasp	-2.07405	-2.0723	0.00175213
VASP_strain_mp-1093718_1x1x1_-0.01_-0.04_-0.03.vasp	-2.4292	-2.40108	0.0281162	VASP_strain_mp-1093718_1x1x1_-0.01_-0.04_-0.03.vasp	-2.4292	-2.48029	0.0510946
VASP_strain_mp-1093744_1x1x1_0.03_0.05_-0.03.vasp	-2.15726	-2.09963	0.0576314	VASP_strain_mp-1093744_1x1x1_0.03_0.05_-0.03.vasp	-2.15726	-2.1371	0.0201565
VASP_strain_mp-1093878_1x1x1_0.02_-0.01_-0.02.vasp	-1.17294	-1.18458	0.0116354	VASP_strain_mp-1093878_1x1x1_0.02_-0.01_-0.02.vasp	-1.17294	-1.15012	0.0228256
VASP_strain_mp-1093915_1x1x1_-0.02_-0.01_-0.05.vasp	-4.34237	-4.24973	0.0926398	VASP_strain_mp-1093915_1x1x1_-0.02_-0.01_-0.05.vasp	-4.34237	-4.2905	0.0518739
VASP_strain_mp-1093933_1x1x1_-0.02_-0.05_-0.01.vasp	-5.54069	-5.60205	0.0613569	VASP_strain_mp-1093933_1x1x1_-0.02_-0.05_-0.01.vasp	-5.54069	-5.52904	0.011657
VASP_strain_mp-1093943_1x1x1_0.01_0.03_-0.05.vasp	-1.80245	-1.69151	0.110941	VASP_strain_mp-1093943_1x1x1_0.01_0.03_-0.05.vasp	-1.80245	-1.75454	0.0479076
VASP_strain_mp-1093959_1x1x1_-0.03_0.04_-0.05.vasp	-2.95473	-2.99148	0.036756	VASP_strain_mp-1093959_1x1x1_-0.03_0.04_-0.05.vasp	-2.95473	-2.99983	0.0451049
VASP_strain_mp-1094247_1x1x1_0.04_-0.05_0.04.vasp	-2.75855	-2.70146	0.0570913	VASP_strain_mp-1094247_1x1x1_0.04_-0.05_0.04.vasp	-2.75855	-2.73018	0.0283726
VASP_strain_mp-1094257_1x1x1_-0.02_0.05_0.05.vasp	-4.65121	-4.65792	0.0067051	VASP_strain_mp-1094257_1x1x1_-0.02_0.05_0.05.vasp	-4.65121	-4.66967	0.0184578
VASP_strain_mp-1094731_1x1x1_-0.03_-0.03_-0.02.vasp	-1.50205	-1.55799	0.055934	VASP_strain_mp-1094731_1x1x1_-0.03_-0.03_-0.02.vasp	-1.50205	-1.57641	0.0743546
VASP_strain_mp-1094880_1x1x1_0.04_0.03_0.05.vasp	-1.59353	-1.5366	0.0569351	VASP_strain_mp-1094880_1x1x1_0.04_0.03_0.05.vasp	-1.59353	-1.45998	0.133548
VASP_strain_mp-1094950_1x1x1_-0.03_-0.02_-0.05.vasp	-2.57701	-2.73307	0.156064	VASP_strain_mp-1094950_1x1x1_-0.03_-0.02_-0.05.vasp	-2.57701	-2.72981	0.152801
VASP_strain_mp-1094956_1x1x1_-0.05_0.01_0.05.vasp	-1.29265	-1.29479	0.00214534	VASP_strain_mp-1094956_1x1x1_-0.05_0.01_0.05.vasp	-1.29265	-1.31345	0.0207986
VASP_strain_mp-1094976_1x1x1_-0.01_0.01_-0.04.vasp	-1.54212	-1.58634	0.0442137	VASP_strain_mp-1094976_1x1x1_-0.01_0.01_-0.04.vasp	-1.54212	-1.54803	0.00590184
VASP_strain_mp-1095738_1x1x1_0.05_-0.01_-0.04.vasp	-0.164289	-0.187199	0.0229098	VASP_strain_mp-1095738_1x1x1_0.05_-0.01_-0.04.vasp	-0.164289	-0.185159	0.0208701
VASP_strain_mp-1095865_1x1x1_-0.04_0.05_0.02.vasp	-4.85155	-5.03414	0.182594	VASP_strain_mp-1095865_1x1x1_-0.04_0.05_0.02.vasp	-4.85155	-5.04615	0.194607
VASP_strain_mp-1095895_1x1x1_0.05_-0.03_0.04.vasp	-0.580386	-0.612272	0.0318855	VASP_strain_mp-1095895_1x1x1_0.05_-0.03_0.04.vasp	-0.580386	-0.66099	0.0806037
VASP_strain_mp-1095930_1x1x1_0.04_-0.02_0.02.vasp	-4.4542	-4.44827	0.00592262	VASP_strain_mp-1095930_1x1x1_0.04_-0.02_0.02.vasp	-4.4542	-4.41852	0.0356735
VASP_strain_mp-1096047_1x1x1_-0.05_0.04_0.05.vasp	-2.67649	-2.86072	0.184222	VASP_strain_mp-1096047_1x1x1_-0.05_0.04_0.05.vasp	-2.67649	-2.7776	0.101102
VASP_strain_mp-1096189_1x1x1_0.02_0.01_0.04.vasp	-1.70145	-1.7292	0.0277498	VASP_strain_mp-1096189_1x1x1_0.02_0.01_0.04.vasp	-1.70145	-1.74162	0.0401674
VASP_strain_mp-1096190_1x1x1_-0.04_-0.02_0.02.vasp	-2.6456	-2.72735	0.0817538	VASP_strain_mp-1096190_1x1x1_-0.04_-0.02_0.02.vasp	-2.6456	-2.79188	0.146285
VASP_strain_mp-1096212_1x1x1_0.03_-0.04_-0.02.vasp	-3.0155	-2.99179	0.0237123	VASP_strain_mp-1096212_1x1x1_0.03_-0.04_-0.02.vasp	-3.0155	-2.9921	0.0234073
VASP_strain_mp-1096279_1x1x1_0.04_0.02_-0.02.vasp	-6.57531	-6.63685	0.0615421	VASP_strain_mp-1096279_1x1x1_0.04_0.02_-0.02.vasp	-6.57531	-6.60758	0.0322697
VASP_strain_mp-1096353_1x1x1_-0.01_0.03_-0.05.vasp	-5.83247	-5.74571	0.0867685	VASP_strain_mp-1096353_1x1x1_-0.01_0.03_-0.05.vasp	-5.83247	-5.81983	0.0126421
VASP_strain_mp-1096391_1x1x1_0.03_-0.05_-0.05.vasp	-1.84734	-1.88974	0.0424079	VASP_strain_mp-1096391_1x1x1_0.03_-0.05_-0.05.vasp	-1.84734	-1.88316	0.0358229
VASP_strain_mp-1096422_1x1x1_0.01_-0.01_0.04.vasp	-2.65231	-2.65792	0.00561179	VASP_strain_mp-1096422_1x1x1_0.01_-0.01_0.04.vasp	-2.65231	-2.6632	0.0108921
VASP_strain_mp-1096464_1x1x1_0.02_0.04_-0.04.vasp	-0.718345	-0.744877	0.0265323	VASP_strain_mp-1096464_1x1x1_0.02_0.04_-0.04.vasp	-0.718345	-0.765231	0.0468864
VASP_strain_mp-1096489_1x1x1_-0.05_-0.02_-0.03.vasp	-2.70654	-2.78646	0.0799183	VASP_strain_mp-1096489_1x1x1_-0.05_-0.02_-0.03.vasp	-2.70654	-2.8334	0.126863
VASP_strain_mp-1096511_1x1x1_0.01_0.02_0.02.vasp	-6.38245	-6.40929	0.0268376	VASP_strain_mp-1096511_1x1x1_0.01_0.02_0.02.vasp	-6.38245	-6.34575	0.0367003
VASP_strain_mp-1096563_1x1x1_-0.02_0.04_-0.04.vasp	-4.03913	-4.09427	0.0551378	VASP_strain_mp-1096563_1x1x1_-0.02_0.04_-0.04.vasp	-4.03913	-4.09358	0.0544424
VASP_strain_mp-1096577_1x1x1_0.01_0.05_0.05.vasp	-1.6457	-1.62264	0.0230618	VASP_strain_mp-1096577_1x1x1_0.01_0.05_0.05.vasp	-1.6457	-1.6677	0.0220055
VASP_strain_mp-1096617_1x1x1_-0.02_-0.03_-0.04.vasp	-3.66334	-3.74105	0.0777128	VASP_strain_mp-1096617_1x1x1_-0.02_-0.03_-0.04.vasp	-3.66334	-3.71097	0.04763
VASP_strain_mp-1096696_1x1x1_-0.04_0.04_0.02.vasp	-5.02678	-5.15094	0.124159	VASP_strain_mp-1096696_1x1x1_-0.04_0.04_0.02.vasp	-5.02678	-5.0831	0.0563143
VASP_strain_mp-1096710_1x1x1_0.04_-0.02_-0.02.vasp	-5.34628	-5.45064	0.104361	VASP_strain_mp-1096710_1x1x1_0.04_-0.02_-0.02.vasp	-5.34628	-5.35835	0.0120658
VASP_strain_mp-1096726_1x1x1_-0.03_0.05_-0.02.vasp	-1.01892	-1.06218	0.0432586	VASP_strain_mp-1096726_1x1x1_-0.03_0.05_-0.02.vasp	-1.01892	-1.05287	0.0339533
VASP_strain_mp-1097001_1x1x1_0.04_-0.02_-0.03.vasp	-4.78201	-4.78192	9.4221e-05	VASP_strain_mp-1097001_1x1x1_0.04_-0.02_-0.03.vasp	-4.78201	-4.77855	0.00346546
VASP_strain_mp-1097139_1x1x1_0.01_0.05_-0.02.vasp	-1.33607	-1.33182	0.0042497	VASP_strain_mp-1097139_1x1x1_0.01_0.05_-0.02.vasp	-1.33607	-1.33253	0.00354067
VASP_strain_mp-1097146_1x1x1_-0.05_0.03_-0.03.vasp	-6.12806	-6.17204	0.0439842	VASP_strain_mp-1097146_1x1x1_-0.05_0.03_-0.03.vasp	-6.12806	-6.07453	0.0535312
VASP_strain_mp-1097183_1x1x1_0.02_0.03_-0.01.vasp	-2.10586	-2.15844	0.0525789	VASP_strain_mp-1097183_1x1x1_0.02_0.03_-0.01.vasp	-2.10586	-2.13414	0.0282863
VASP_strain_mp-1097218_1x1x1_0.05_0.05_0.04.vasp	-0.636059	-0.641083	0.0050241	VASP_strain_mp-1097218_1x1x1_0.05_0.05_0.04.vasp	-0.636059	-0.652708	0.016649
VASP_strain_mp-1097232_1x1x1_-0.04_-0.01_0.03.vasp	-2.08921	-2.11795	0.0287442	VASP_strain_mp-1097232_1x1x1_-0.04_-0.01_0.03.vasp	-2.08921	-2.12033	0.0311164
VASP_strain_mp-1097261_1x1x1_-0.01_-0.03_0.01.vasp	-5.59523	-5.55819	0.0370412	VASP_strain_mp-1097261_1x1x1_-0.01_-0.03_0.01.vasp	-5.59523	-5.53729	0.0579335
VASP_strain_mp-1097367_1x1x1_0.03_0.05_0.05.vasp	-1.83144	-1.82059	0.0108479	VASP_strain_mp-1097367_1x1x1_0.03_0.05_0.05.vasp	-1.83144	-1.82635	0.00508918
VASP_strain_mp-1097376_1x1x1_-0.02_0.01_0.02.vasp	-0.320636	-0.326694	0.00605743	VASP_strain_mp-1097376_1x1x1_-0.02_0.01_0.02.vasp	-0.320636	-0.430572	0.109936
VASP_strain_mp-1097419_1x1x1_-0.03_-0.01_-0.04.vasp	-4.84752	-5.01548	0.167964	VASP_strain_mp-1097419_1x1x1_-0.03_-0.01_-0.04.vasp	-4.84752	-4.97735	0.129834
VASP_strain_mp-1097452_1x1x1_0.03_-0.05_-0.05.vasp	-1.00364	-1.00582	0.00218578	VASP_strain_mp-1097452_1x1x1_0.03_-0.05_-0.05.vasp	-1.00364	-1.00347	0.000167802
VASP_strain_mp-1097457_1x1x1_-0.03_0.03_0.03.vasp	-0.853108	-0.807268	0.0458393	VASP_strain_mp-1097457_1x1x1_-0.03_0.03_0.03.vasp	-0.853108	-0.825752	0.027356
VASP_strain_mp-1097477_1x1x1_-0.05_0.03_-0.02.vasp	-3.72015	-3.96903	0.248877	VASP_strain_mp-1097477_1x1x1_-0.05_0.03_-0.02.vasp	-3.72015	-3.96849	0.248339
VASP_strain_mp-1097510_1x1x1_-0.05_-0.01_0.04.vasp	-4.92141	-5.0902	0.168794	VASP_strain_mp-1097510_1x1x1_-0.05_-0.01_0.04.vasp	-4.92141	-4.94599	0.0245838
VASP_strain_mp-1097532_1x1x1_0.03_0.05_0.01.vasp	-2.08515	-2.13073	0.04558	VASP_strain_mp-1097532_1x1x1_0.03_0.05_0.01.vasp	-2.08515	-2.07952	0.00562974
VASP_strain_mp-1097555_1x1x1_-0.05_-0.03_-0.04.vasp	-6.10399	-6.23115	0.127162	VASP_strain_mp-1097555_1x1x1_-0.05_-0.03_-0.04.vasp	-6.10399	-6.23897	0.134981
VASP_strain_mp-1097606_1x1x1_0.01_0.04_0.03.vasp	-2.77316	-2.79712	0.0239664	VASP_strain_mp-1097606_1x1x1_0.01_0.04_0.03.vasp	-2.77316	-2.69433	0.0788243
VASP_strain_mp-1097617_1x1x1_-0.05_0.04_0.04.vasp	-1.72344	-1.67679	0.046649	VASP_strain_mp-1097617_1x1x1_-0.05_0.04_0.04.vasp	-1.72344	-1.7177	0.00573516
VASP_strain_mp-1097662_1x1x1_0.03_0.02_-0.04.vasp	-5.03	-5.01583	0.0141696	VASP_strain_mp-1097662_1x1x1_0.03_0.02_-0.04.vasp	-5.03	-4.9969	0.0331039
VASP_strain_mp-1098698_1x1x1_0.02_0.05_-0.01.vasp	-4.34627	-4.38386	0.0375935	VASP_strain_mp-1098698_1x1x1_0.02_0.05_-0.01.vasp	-4.34627	-4.35873	0.0124644
VASP_strain_mp-1098698_1x1x1_-0.03_-0.02_-0.02.vasp	-4.37698	-4.47477	0.0977839	VASP_strain_mp-1098698_1x1x1_-0.03_-0.02_-0.02.vasp	-4.37698	-4.48857	0.111591
VASP_strain_mp-1100394_1x1x1_0.02_-0.04_-0.01.vasp	-4.90375	-4.99654	0.0927924	VASP_strain_mp-1100394_1x1x1_0.02_-0.04_-0.01.vasp	-4.90375	-4.97817	0.0744205
VASP_strain_mp-1100414_1x1x1_-0.05_-0.05_0.04.vasp	-7.66398	-7.87609	0.212112	VASP_strain_mp-1100414_1x1x1_-0.05_-0.05_0.04.vasp	-7.66398	-7.76155	0.0975748
VASP_strain_mp-1135_1x1x1_0.02_-0.02_-0.02.vasp	-6.84906	-6.9392	0.0901353	VASP_strain_mp-1135_1x1x1_0.02_-0.02_-0.02.vasp	-6.84906	-6.88964	0.0405834
VASP_strain_mp-11375_1x1x1_0.05_0.01_0.05.vasp	-5.77869	-5.67679	0.1019	VASP_strain_mp-11375_1x1x1_0.05_0.01_0.05.vasp	-5.77869	-5.71236	0.0663294
VASP_strain_mp-11416_1x1x1_-0.02_-0.04_0.04.vasp	-5.24752	-5.36528	0.117759	VASP_strain_mp-11416_1x1x1_-0.02_-0.04_0.04.vasp	-5.24752	-5.36526	0.117733
VASP_strain_mp-11561_1x1x1_0.02_-0.02_-0.03.vasp	-6.72365	-6.78885	0.0651976	VASP_strain_mp-11561_1x1x1_0.02_-0.02_-0.03.vasp	-6.72365	-6.80082	0.0771694
VASP_strain_mp-11723_1x1x1_-0.04_0.05_0.05.vasp	-7.38102	-7.22194	0.159082	VASP_strain_mp-11723_1x1x1_-0.04_0.05_0.05.vasp	-7.38102	-7.18242	0.198599
VASP_strain_mp-1180_1x1x1_-0.01_0.01_-0.03.vasp	-7.16361	-7.16265	0.000962054	VASP_strain_mp-1180_1x1x1_-0.01_0.01_-0.03.vasp	-7.16361	-7.0435	0.120107
VASP_strain_mp-1182123_1x1x1_0.04_0.04_-0.02.vasp	-4.01775	-3.87834	0.139409	VASP_strain_mp-1182123_1x1x1_0.04_0.04_-0.02.vasp	-4.01775	-3.8895	0.12825
VASP_strain_mp-1183048_1x1x1_-0.02_0.02_0.05.vasp	-8.21477	-8.03217	0.182595	VASP_strain_mp-1183048_1x1x1_-0.02_0.02_0.05.vasp	-8.21477	-7.93422	0.280553
VASP_strain_mp-1183073_1x1x1_-0.05_0.01_-0.02.vasp	-3.59115	-3.68073	0.0895828	VASP_strain_mp-1183073_1x1x1_-0.05_0.01_-0.02.vasp	-3.59115	-3.66554	0.0743907
VASP_strain_mp-1183105_1x1x1_0.04_0.03_-0.04.vasp	-4.40255	-4.43959	0.0370376	VASP_strain_mp-1183105_1x1x1_0.04_0.03_-0.04.vasp	-4.40255	-4.35605	0.0465019
VASP_strain_mp-1183118_1x1x1_0.01_-0.03_-0.01.vasp	-2.91552	-2.94801	0.032494	VASP_strain_mp-1183118_1x1x1_0.01_-0.03_-0.01.vasp	-2.91552	-2.9469	0.0313772
VASP_strain_mp-1183146_1x1x1_-0.02_-0.04_-0.05.vasp	-3.15411	-3.57447	0.420362	VASP_strain_mp-1183146_1x1x1_-0.02_-0.04_-0.05.vasp	-3.15411	-3.41713	0.263021
VASP_strain_mp-1183149_1x1x1_0.04_0.01_0.05.vasp	-4.09196	-4.08941	0.00255022	VASP_strain_mp-1183149_1x1x1_0.04_0.01_0.05.vasp	-4.09196	-3.87572	0.216239
VASP_strain_mp-1183178_1x1x1_-0.04_0.02_0.04.vasp	-3.46785	-3.44143	0.0264163	VASP_strain_mp-1183178_1x1x1_-0.04_0.02_0.04.vasp	-3.46785	-3.34215	0.125697
VASP_strain_mp-1183401_1x1x1_0.03_0.01_-0.01.vasp	-7.94794	-7.87585	0.0720954	VASP_strain_mp-1183401_1x1x1_0.03_0.01_-0.01.vasp	-7.94794	-7.90904	0.0389046
VASP_strain_mp-1183465_1x1x1_0.04_-0.01_-0.01.vasp	-3.68602	-3.66263	0.0233941	VASP_strain_mp-1183465_1x1x1_0.04_-0.01_-0.01.vasp	-3.68602	-3.64537	0.040658
VASP_strain_mp-1183468_1x1x1_0.02_-0.02_-0.03.vasp	-2.70505	-2.69928	0.00576294	VASP_strain_mp-1183468_1x1x1_0.02_-0.02_-0.03.vasp	-2.70505	-2.68934	0.0157038
VASP_strain_mp-1183550_1x1x1_0.01_0.03_-0.02.vasp	-5.84577	-5.83511	0.0106583	VASP_strain_mp-1183550_1x1x1_0.01_0.03_-0.02.vasp	-5.84577	-5.82994	0.0158371
VASP_strain_mp-1183614_1x1x1_-0.04_0.04_-0.02.vasp	-2.71733	-2.77638	0.0590426	VASP_strain_mp-1183614_1x1x1_-0.04_0.04_-0.02.vasp	-2.71733	-2.7357	0.0183678
VASP_strain_mp-1183624_1x1x1_0.02_-0.01_-0.02.vasp	-1.85074	-1.85148	0.000741081	VASP_strain_mp-1183624_1x1x1_0.02_-0.01_-0.02.vasp	-1.85074	-1.84999	0.000743292
VASP_strain_mp-1183629_1x1x1_0.01_-0.03_0.04.vasp	-2.99471	-2.97669	0.0180194	VASP_strain_mp-1183629_1x1x1_0.01_-0.03_0.04.vasp	-2.99471	-3.00018	0.00547836
VASP_strain_mp-1183678_1x1x1_0.05_0.02_-0.05.vasp	-4.02204	-4.21408	0.192046	VASP_strain_mp-1183678_1x1x1_0.05_0.02_-0.05.vasp	-4.02204	-4.32793	0.305892
VASP_strain_mp-1183767_1x1x1_0.01_0.03_-0.04.vasp	-5.50158	-5.54531	0.0437262	VASP_strain_mp-1183767_1x1x1_0.01_0.03_-0.04.vasp	-5.50158	-5.54835	0.0467699
VASP_strain_mp-1183937_1x1x1_-0.01_0.05_0.01.vasp	-1.94391	-1.89705	0.0468646	VASP_strain_mp-1183937_1x1x1_-0.01_0.05_0.01.vasp	-1.94391	-1.8861	0.057815
VASP_strain_mp-1183958_1x1x1_-0.04_0.05_-0.02.vasp	-0.993132	-1.00133	0.00820061	VASP_strain_mp-1183958_1x1x1_-0.04_0.05_-0.02.vasp	-0.993132	-0.914182	0.0789502
VASP_strain_mp-1183968_1x1x1_-0.04_0.03_0.01.vasp	-2.9386	-2.93899	0.00039253	VASP_strain_mp-1183968_1x1x1_-0.04_0.03_0.01.vasp	-2.9386	-2.9074	0.0312007
VASP_strain_mp-1184055_1x1x1_-0.01_0.04_-0.05.vasp	-7.46817	-7.56731	0.0991435	VASP_strain_mp-1184055_1x1x1_-0.01_0.04_-0.05.vasp	-7.46817	-7.53464	0.0664699
VASP_strain_mp-1184079_1x1x1_-0.02_-0.02_0.05.vasp	-3.58488	-3.60648	0.0216006	VASP_strain_mp-1184079_1x1x1_-0.02_-0.02_0.05.vasp	-3.58488	-3.59347	0.00858623
VASP_strain_mp-1184103_1x1x1_-0.05_-0.01_0.04.vasp	-7.97983	-8.07934	0.0995149	VASP_strain_mp-1184103_1x1x1_-0.05_-0.01_0.04.vasp	-7.97983	-8.0568	0.0769728
VASP_strain_mp-1184109_1x1x1_0.03_-0.03_-0.03.vasp	-4.38311	-4.42687	0.0437642	VASP_strain_mp-1184109_1x1x1_0.03_-0.03_-0.03.vasp	-4.38311	-4.40744	0.0243385
VASP_strain_mp-1184166_1x1x1_0.03_0.05_0.02.vasp	-5.67029	-5.50931	0.160985	VASP_strain_mp-1184166_1x1x1_0.03_0.05_0.02.vasp	-5.67029	-5.52005	0.150239
VASP_strain_mp-1184170_1x1x1_-0.01_-0.01_0.05.vasp	-3.97876	-3.95203	0.026736	VASP_strain_mp-1184170_1x1x1_-0.01_-0.01_0.05.vasp	-3.97876	-3.91927	0.0594898
VASP_strain_mp-1184216_1x1x1_0.05_0.02_-0.03.vasp	-3.88226	-3.85917	0.0230887	VASP_strain_mp-1184216_1x1x1_0.05_0.02_-0.03.vasp	-3.88226	-3.84917	0.0330847
VASP_strain_mp-1184379_1x1x1_-0.03_0.02_0.03.vasp	-9.33614	-9.12466	0.21148	VASP_strain_mp-1184379_1x1x1_-0.03_0.02_0.03.vasp	-9.33614	-9.11627	0.219874
VASP_strain_mp-1184405_1x1x1_-0.04_-0.01_0.04.vasp	-9.12302	-9.14176	0.0187449	VASP_strain_mp-1184405_1x1x1_-0.04_-0.01_0.04.vasp	-9.12302	-9.19463	0.0716116
VASP_strain_mp-1184431_1x1x1_0.04_0.03_0.02.vasp	-4.56715	-4.5537	0.0134493	VASP_strain_mp-1184431_1x1x1_0.04_0.03_0.02.vasp	-4.56715	-4.51989	0.0472646
VASP_strain_mp-1184493_1x1x1_-0.04_0.01_0.03.vasp	-2.54316	-2.57001	0.0268474	VASP_strain_mp-1184493_1x1x1_-0.04_0.01_0.03.vasp	-2.54316	-2.57208	0.028925
VASP_strain_mp-1184534_1x1x1_-0.03_-0.04_-0.01.vasp	-2.91164	-3.02723	0.11559	VASP_strain_mp-1184534_1x1x1_-0.03_-0.04_-0.01.vasp	-2.91164	-3.10028	0.188631
VASP_strain_mp-1184583_1x1x1_0.04_0.02_0.03.vasp	-5.81346	-5.61941	0.194048	VASP_strain_mp-1184583_1x1x1_0.04_0.02_0.03.vasp	-5.81346	-5.6226	0.190856
VASP_strain_mp-1184594_1x1x1_0.03_-0.04_-0.01.vasp	-9.42554	-9.55743	0.13189	VASP_strain_mp-1184594_1x1x1_0.03_-0.04_-0.01.vasp	-9.42554	-9.53879	0.113243
VASP_strain_mp-1184647_1x1x1_0.01_0.04_0.05.vasp	-8.41045	-8.18853	0.221918	VASP_strain_mp-1184647_1x1x1_0.01_0.04_0.05.vasp	-8.41045	-8.15648	0.253971
VASP_strain_mp-1184677_1x1x1_0.03_0.03_-0.03.vasp	-5.21109	-5.15017	0.0609287	VASP_strain_mp-1184677_1x1x1_0.03_0.03_-0.03.vasp	-5.21109	-5.12386	0.0872399
VASP_strain_mp-1184679_1x1x1_-0.01_0.01_0.02.vasp	-2.85191	-2.84329	0.00862815	VASP_strain_mp-1184679_1x1x1_-0.01_0.01_0.02.vasp	-2.85191	-2.85336	0.00144012
VASP_strain_mp-1184907_1x1x1_-0.03_0.04_-0.05.vasp	-0.948708	-0.927792	0.0209163	VASP_strain_mp-1184907_1x1x1_-0.03_0.04_-0.05.vasp	-0.948708	-0.940135	0.00857313
VASP_strain_mp-1185022_1x1x1_0.03_-0.05_-0.02.vasp	-2.32537	-2.3187	0.00667486	VASP_strain_mp-1185022_1x1x1_0.03_-0.05_-0.02.vasp	-2.32537	-2.33686	0.0114858
VASP_strain_mp-1185030_1x1x1_0.02_0.02_0.02.vasp	-2.16562	-2.41304	0.247427	VASP_strain_mp-1185030_1x1x1_0.02_0.02_0.02.vasp	-2.16562	-2.21509	0.0494695
VASP_strain_mp-1185132_1x1x1_0.03_0.04_0.03.vasp	-4.73026	-4.65375	0.076516	VASP_strain_mp-1185132_1x1x1_0.03_0.04_0.03.vasp	-4.73026	-4.61472	0.115547
VASP_strain_mp-1185219_1x1x1_0.05_-0.02_-0.02.vasp	-3.47677	-3.47975	0.0029792	VASP_strain_mp-1185219_1x1x1_0.05_-0.02_-0.02.vasp	-3.47677	-3.42457	0.0521955
VASP_strain_mp-1185229_1x1x1_0.04_-0.02_0.03.vasp	-4.28642	-4.24185	0.0445712	VASP_strain_mp-1185229_1x1x1_0.04_-0.02_0.03.vasp	-4.28642	-4.23795	0.0484748
VASP_strain_mp-1185327_1x1x1_0.05_0.04_-0.01.vasp	-3.46291	-3.39095	0.071964	VASP_strain_mp-1185327_1x1x1_0.05_0.04_-0.01.vasp	-3.46291	-3.33451	0.128399
VASP_strain_mp-1185361_1x1x1_-0.05_-0.01_-0.04.vasp	-7.60307	-7.89161	0.28854	VASP_strain_mp-1185361_1x1x1_-0.05_-0.01_-0.04.vasp	-7.60307	-7.82305	0.219982
VASP_strain_mp-1185368_1x1x1_0.05_0.04_0.03.vasp	-2.29386	-2.278	0.0158622	VASP_strain_mp-1185368_1x1x1_0.05_0.04_0.03.vasp	-2.29386	-2.29598	0.00212371
VASP_strain_mp-1185455_1x1x1_-0.04_-0.02_0.01.vasp	-5.97788	-6.10968	0.131796	VASP_strain_mp-1185455_1x1x1_-0.04_-0.02_0.01.vasp	-5.97788	-6.15709	0.179204
VASP_strain_mp-1185505_1x1x1_-0.04_0.01_0.03.vasp	-7.54388	-7.57574	0.0318671	VASP_strain_mp-1185505_1x1x1_-0.04_0.01_0.03.vasp	-7.54388	-7.61036	0.0664829
VASP_strain_mp-1185507_1x1x1_-0.05_0.02_0.01.vasp	-2.15634	-2.25306	0.0967206	VASP_strain_mp-1185507_1x1x1_-0.05_0.02_0.01.vasp	-2.15634	-2.24382	0.0874822
VASP_strain_mp-1185917_1x1x1_-0.01_-0.01_0.02.vasp	-4.80134	-4.80952	0.0081824	VASP_strain_mp-1185917_1x1x1_-0.01_-0.01_0.02.vasp	-4.80134	-4.79444	0.00689978
VASP_strain_mp-1186003_1x1x1_-0.01_0.05_-0.02.vasp	-4.2582	-4.27244	0.0142432	VASP_strain_mp-1186003_1x1x1_-0.01_0.05_-0.02.vasp	-4.2582	-4.23739	0.0208041
VASP_strain_mp-1186052_1x1x1_-0.01_0.03_-0.04.vasp	-2.71619	-2.73362	0.0174267	VASP_strain_mp-1186052_1x1x1_-0.01_0.03_-0.04.vasp	-2.71619	-2.76246	0.046269
VASP_strain_mp-1186066_1x1x1_0.04_-0.01_0.03.vasp	-1.93415	-1.95388	0.0197298	VASP_strain_mp-1186066_1x1x1_0.04_-0.01_0.03.vasp	-1.93415	-1.90743	0.0267227
VASP_strain_mp-1186132_1x1x1_0.01_0.03_-0.03.vasp	-1.70747	-1.71605	0.00857494	VASP_strain_mp-1186132_1x1x1_0.01_0.03_-0.03.vasp	-1.70747	-1.66167	0.0457994
VASP_strain_mp-1186174_1x1x1_0.05_0.05_-0.01.vasp	-3.91988	-3.81221	0.107669	VASP_strain_mp-1186174_1x1x1_0.05_0.05_-0.01.vasp	-3.91988	-3.76988	0.149999
VASP_strain_mp-1186202_1x1x1_0.05_-0.03_-0.05.vasp	-4.85473	-4.92286	0.0681281	VASP_strain_mp-1186202_1x1x1_0.05_-0.03_-0.05.vasp	-4.85473	-4.94986	0.0951273
VASP_strain_mp-1186300_1x1x1_-0.03_-0.02_0.01.vasp	-4.51925	-4.56569	0.0464402	VASP_strain_mp-1186300_1x1x1_-0.03_-0.02_0.01.vasp	-4.51925	-4.55247	0.0332195
VASP_strain_mp-1186406_1x1x1_0.05_-0.05_0.03.vasp	-8.66502	-8.65761	0.00741052	VASP_strain_mp-1186406_1x1x1_0.05_-0.05_0.03.vasp	-8.66502	-8.59523	0.0697952
VASP_strain_mp-1186421_1x1x1_0.01_0.03_0.04.vasp	-3.7203	-3.62332	0.096974	VASP_strain_mp-1186421_1x1x1_0.01_0.03_0.04.vasp	-3.7203	-3.6589	0.0613987
VASP_strain_mp-1186452_1x1x1_-0.02_0.04_0.02.vasp	-4.54258	-4.51235	0.0302243	VASP_strain_mp-1186452_1x1x1_-0.02_0.04_0.02.vasp	-4.54258	-4.48381	0.0587642
VASP_strain_mp-1186478_1x1x1_-0.03_-0.02_-0.04.vasp	-3.33987	-3.46433	0.124466	VASP_strain_mp-1186478_1x1x1_-0.03_-0.02_-0.04.vasp	-3.33987	-3.50168	0.161815
VASP_strain_mp-1186586_1x1x1_0.01_-0.01_-0.01.vasp	-7.10684	-7.13732	0.0304876	VASP_strain_mp-1186586_1x1x1_0.01_-0.01_-0.01.vasp	-7.10684	-7.12127	0.0144376
VASP_strain_mp-1186589_1x1x1_-0.05_-0.01_-0.01.vasp	-3.73654	-3.8525	0.115959	VASP_strain_mp-1186589_1x1x1_-0.05_-0.01_-0.01.vasp	-3.73654	-3.84002	0.103475
VASP_strain_mp-1186596_1x1x1_0.04_0.03_-0.01.vasp	-4.35066	-4.28031	0.0703492	VASP_strain_mp-1186596_1x1x1_0.04_0.03_-0.01.vasp	-4.35066	-4.25701	0.0936505
VASP_strain_mp-1186652_1x1x1_0.02_0.02_-0.05.vasp	-6.62703	-6.67169	0.0446599	VASP_strain_mp-1186652_1x1x1_0.02_0.02_-0.05.vasp	-6.62703	-6.69564	0.0686144
VASP_strain_mp-1186694_1x1x1_-0.05_0.02_-0.03.vasp	-3.77403	-3.89278	0.11875	VASP_strain_mp-1186694_1x1x1_-0.05_0.02_-0.03.vasp	-3.77403	-3.88546	0.11143
VASP_strain_mp-1186739_1x1x1_0.03_-0.03_-0.04.vasp	-4.03043	-4.10293	0.0725009	VASP_strain_mp-1186739_1x1x1_0.03_-0.03_-0.04.vasp	-4.03043	-4.1165	0.0860666
VASP_strain_mp-1186789_1x1x1_0.02_-0.03_-0.05.vasp	-3.77591	-3.2152	0.560717	VASP_strain_mp-1186789_1x1x1_0.02_-0.03_-0.05.vasp	-3.77591	-3.77961	0.00369569
VASP_strain_mp-1186873_1x1x1_0.04_-0.04_-0.05.vasp	-0.978928	-1.00951	0.0305867	VASP_strain_mp-1186873_1x1x1_0.04_-0.04_-0.05.vasp	-0.978928	-0.983111	0.00418334
VASP_strain_mp-1186957_1x1x1_-0.04_0.03_0.03.vasp	-8.40245	-8.38058	0.0218737	VASP_strain_mp-1186957_1x1x1_-0.04_0.03_0.03.vasp	-8.40245	-8.40954	0.00708617
VASP_strain_mp-1186972_1x1x1_0.02_0.04_0.03.vasp	-7.07344	-6.91363	0.159809	VASP_strain_mp-1186972_1x1x1_0.02_0.04_0.03.vasp	-7.07344	-6.85687	0.216572
VASP_strain_mp-1187127_1x1x1_0.04_0.01_-0.05.vasp	-2.28432	-2.28729	0.0029742	VASP_strain_mp-1187127_1x1x1_0.04_0.01_-0.05.vasp	-2.28432	-2.31072	0.0264032
VASP_strain_mp-1187136_1x1x1_-0.04_-0.01_-0.03.vasp	-2.52713	-2.60575	0.0786205	VASP_strain_mp-1187136_1x1x1_-0.04_-0.01_-0.03.vasp	-2.52713	-2.66954	0.142406
VASP_strain_mp-1187275_1x1x1_0.01_0.04_-0.03.vasp	-4.74135	-4.78573	0.0443805	VASP_strain_mp-1187275_1x1x1_0.01_0.04_-0.03.vasp	-4.74135	-4.7229	0.0184528
VASP_strain_mp-1187401_1x1x1_0.05_0.05_-0.05.vasp	-2.79991	-2.80036	0.000447609	VASP_strain_mp-1187401_1x1x1_0.05_0.05_-0.05.vasp	-2.79991	-2.76968	0.0302272
VASP_strain_mp-1187417_1x1x1_0.05_-0.01_0.01.vasp	-8.28153	-8.15059	0.130948	VASP_strain_mp-1187417_1x1x1_0.05_-0.01_0.01.vasp	-8.28153	-8.2004	0.0811322
VASP_strain_mp-1187432_1x1x1_0.05_0.01_-0.04.vasp	-8.60983	-8.58434	0.0254844	VASP_strain_mp-1187432_1x1x1_0.05_0.01_-0.04.vasp	-8.60983	-8.56603	0.043792
VASP_strain_mp-1187437_1x1x1_-0.05_-0.04_0.04.vasp	-4.0371	-4.14917	0.112069	VASP_strain_mp-1187437_1x1x1_-0.05_-0.04_0.04.vasp	-4.0371	-4.1538	0.116707
VASP_strain_mp-1187447_1x1x1_0.05_0.01_0.05.vasp	-8.78211	-8.50676	0.275355	VASP_strain_mp-1187447_1x1x1_0.05_0.01_0.05.vasp	-8.78211	-8.5969	0.185215
VASP_strain_mp-1187453_1x1x1_0.05_0.05_0.03.vasp	-6.39835	-6.07458	0.323772	VASP_strain_mp-1187453_1x1x1_0.05_0.05_0.03.vasp	-6.39835	-6.14061	0.257747
VASP_strain_mp-1187502_1x1x1_0.02_0.03_0.01.vasp	-2.66091	-2.67939	0.0184797	VASP_strain_mp-1187502_1x1x1_0.02_0.03_0.01.vasp	-2.66091	-2.63587	0.0250394
VASP_strain_mp-1187524_1x1x1_-0.02_-0.04_0.04.vasp	-7.45386	-7.53167	0.0778037	VASP_strain_mp-1187524_1x1x1_-0.02_-0.04_0.04.vasp	-7.45386	-7.51058	0.0567201
VASP_strain_mp-1187598_1x1x1_0.05_0.02_0.04.vasp	-2.93887	-2.86018	0.0786918	VASP_strain_mp-1187598_1x1x1_0.05_0.02_0.04.vasp	-2.93887	-2.80242	0.136452
VASP_strain_mp-1187666_1x1x1_-0.02_-0.01_0.01.vasp	-2.89948	-3.1564	0.256924	VASP_strain_mp-1187666_1x1x1_-0.02_-0.01_0.01.vasp	-2.89948	-3.06815	0.168672
VASP_strain_mp-1187697_1x1x1_-0.02_0.05_0.05.vasp	-8.88212	-8.6663	0.215828	VASP_strain_mp-1187697_1x1x1_-0.02_0.05_0.05.vasp	-8.88212	-8.66554	0.216587
VASP_strain_mp-1187706_1x1x1_-0.04_-0.04_-0.03.vasp	-3.82768	-4.03247	0.204781	VASP_strain_mp-1187706_1x1x1_-0.04_-0.04_-0.03.vasp	-3.82768	-4.06197	0.234281
VASP_strain_mp-1215184_1x1x1_-0.02_0.03_0.05.vasp	-9.6752	-9.58325	0.0919543	VASP_strain_mp-1215184_1x1x1_-0.02_0.03_0.05.vasp	-9.6752	-9.58281	0.0923969
VASP_strain_mp-1215438_1x1x1_0.01_0.02_-0.01.vasp	-3.01989	-2.98609	0.0337986	VASP_strain_mp-1215438_1x1x1_0.01_0.02_-0.01.vasp	-3.01989	-2.95378	0.0661061
VASP_strain_mp-1215447_1x1x1_0.02_0.01_-0.05.vasp	-2.79411	-2.80305	0.00894575	VASP_strain_mp-1215447_1x1x1_0.02_0.01_-0.05.vasp	-2.79411	-2.86829	0.074184
VASP_strain_mp-1216270_1x1x1_-0.01_0.02_0.03.vasp	-7.1072	-7.05513	0.052076	VASP_strain_mp-1216270_1x1x1_-0.01_0.02_0.03.vasp	-7.1072	-7.00125	0.105947
VASP_strain_mp-1216347_1x1x1_0.01_0.01_0.01.vasp	-8.7266	-8.67065	0.0559467	VASP_strain_mp-1216347_1x1x1_0.01_0.01_0.01.vasp	-8.7266	-8.63914	0.0874563
VASP_strain_mp-1216383_1x1x1_-0.05_-0.01_0.01.vasp	-9.32085	-9.52001	0.19917	VASP_strain_mp-1216383_1x1x1_-0.05_-0.01_0.01.vasp	-9.32085	-9.47005	0.149203
VASP_strain_mp-1216917_1x1x1_0.04_0.03_-0.02.vasp	-5.65215	-5.52912	0.123023	VASP_strain_mp-1216917_1x1x1_0.04_0.03_-0.02.vasp	-5.65215	-5.54331	0.10884
VASP_strain_mp-1217014_1x1x1_-0.04_0.04_0.04.vasp	-5.65032	-5.71889	0.0685742	VASP_strain_mp-1217014_1x1x1_-0.04_0.04_0.04.vasp	-5.65032	-5.64055	0.0097642
VASP_strain_mp-1217468_1x1x1_-0.04_0.01_-0.01.vasp	-4.52358	-4.54973	0.0261566	VASP_strain_mp-1217468_1x1x1_-0.04_0.01_-0.01.vasp	-4.52358	-4.56447	0.0408913
VASP_strain_mp-1217699_1x1x1_0.05_-0.04_-0.01.vasp	-3.997	-4.03382	0.0368126	VASP_strain_mp-1217699_1x1x1_0.05_-0.04_-0.01.vasp	-3.997	-4.00793	0.0109249
VASP_strain_mp-1219474_1x1x1_-0.04_-0.01_-0.01.vasp	-3.81638	-4.00457	0.188184	VASP_strain_mp-1219474_1x1x1_-0.04_-0.01_-0.01.vasp	-3.81638	-4.04518	0.228798
VASP_strain_mp-1219928_1x1x1_-0.05_-0.05_0.05.vasp	-4.79119	-5.03629	0.245099	VASP_strain_mp-1219928_1x1x1_-0.05_-0.05_0.05.vasp	-4.79119	-4.9127	0.121512
VASP_strain_mp-1220726_1x1x1_-0.04_-0.04_-0.04.vasp	-10.0988	-10.7053	0.606455	VASP_strain_mp-1220726_1x1x1_-0.04_-0.04_-0.04.vasp	-10.0988	-10.5335	0.434657
VASP_strain_mp-1221348_1x1x1_-0.02_-0.02_0.03.vasp	-5.63228	-5.70606	0.0737863	VASP_strain_mp-1221348_1x1x1_-0.02_-0.02_0.03.vasp	-5.63228	-5.65634	0.0240601
VASP_strain_mp-1221455_1x1x1_-0.02_-0.04_-0.03.vasp	-6.13552	-6.64514	0.509629	VASP_strain_mp-1221455_1x1x1_-0.02_-0.04_-0.03.vasp	-6.13552	-6.59854	0.463028
VASP_strain_mp-1221548_1x1x1_-0.04_0.04_-0.03.vasp	-6.42154	-6.26308	0.158459	VASP_strain_mp-1221548_1x1x1_-0.04_0.04_-0.03.vasp	-6.42154	-6.25598	0.165566
VASP_strain_mp-1221572_1x1x1_-0.05_0.03_0.03.vasp	-6.46371	-6.4666	0.00289341	VASP_strain_mp-1221572_1x1x1_-0.05_0.03_0.03.vasp	-6.46371	-6.69966	0.235948
VASP_strain_mp-1222287_1x1x1_-0.03_-0.03_0.03.vasp	-4.96389	-5.02432	0.0604312	VASP_strain_mp-1222287_1x1x1_-0.03_-0.03_0.03.vasp	-4.96389	-4.98463	0.020741
VASP_strain_mp-1222302_1x1x1_-0.02_-0.05_-0.03.vasp	-6.52815	-6.44307	0.0850815	VASP_strain_mp-1222302_1x1x1_-0.02_-0.05_-0.03.vasp	-6.52815	-6.479	0.049154
VASP_strain_mp-1222310_1x1x1_0.01_-0.01_0.03.vasp	-6.41166	-6.39036	0.0212988	VASP_strain_mp-1222310_1x1x1_0.01_-0.01_0.03.vasp	-6.41166	-6.37085	0.0408133
VASP_strain_mp-1223211_1x1x1_0.02_-0.05_-0.03.vasp	-3.97758	-4.07521	0.0976355	VASP_strain_mp-1223211_1x1x1_0.02_-0.05_-0.03.vasp	-3.97758	-4.05542	0.0778449
VASP_strain_mp-1223230_1x1x1_-0.01_0.03_0.05.vasp	-3.97663	-3.91521	0.0614263	VASP_strain_mp-1223230_1x1x1_-0.01_0.03_0.05.vasp	-3.97663	-3.87643	0.100203
VASP_strain_mp-1223230_1x1x1_0.01_0.04_0.05.vasp	-3.95939	-3.877	0.0823975	VASP_strain_mp-1223230_1x1x1_0.01_0.04_0.05.vasp	-3.95939	-3.83238	0.127018
VASP_strain_mp-1223646_1x1x1_0.02_0.04_0.05.vasp	-3.50507	-3.29786	0.207208	VASP_strain_mp-1223646_1x1x1_0.02_0.04_0.05.vasp	-3.50507	-3.3433	0.161769
VASP_strain_mp-1224815_1x1x1_0.04_0.01_0.03.vasp	-3.30196	-3.24948		VASP_strain_mp-1224815_1x1x1_0.04_0.01_0.03.vasp	-3.30196	-3.23218
VASP_strain_mp-1225177_1x1x1_0.03_-0.05_-0.02.vasp	-7.5454	-7.63389		VASP_strain_mp-1225177_1x1x1_0.03_-0.05_-0.02.vasp	-7.5454	-7.57023
VASP_strain_mp-1225323_1x1x1_-0.04_-0.04_-0.01.vasp	-3.96328	-4.10448		VASP_strain_mp-1225323_1x1x1_-0.04_-0.04_-0.01.vasp	-3.96328	-4.11446
VASP_strain_mp-1225381_1x1x1_-0.05_-0.02_-0.05.vasp	-6.34966	-6.57862		VASP_strain_mp-1225381_1x1x1_-0.05_-0.02_-0.05.vasp	-6.34966	-6.61162
VASP_strain_mp-1225798_1x1x1_0.04_-0.01_0.01.vasp	-2.86744	-2.85188		VASP_strain_mp-1225798_1x1x1_0.04_-0.01_0.01.vasp	-2.86744	-2.80991
VASP_strain_mp-1226715_1x1x1_-0.01_-0.04_0.01.vasp	-4.64424	-4.72953		VASP_strain_mp-1226715_1x1x1_-0.01_-0.04_0.01.vasp	-4.64424	-4.68319
VASP_strain_mp-1226726_1x1x1_-0.03_-0.05_0.05.vasp	-1.72424	-1.79101		VASP_strain_mp-1226726_1x1x1_-0.03_-0.05_0.05.vasp	-1.72424	-1.81111
VASP_strain_mp-1227290_1x1x1_0.01_0.04_0.01.vasp	-4.01263	-3.88024		VASP_strain_mp-1227290_1x1x1_0.01_0.04_0.01.vasp	-4.01263	-3.87876
VASP_strain_mp-1232420_1x1x1_-0.02_0.03_0.02.vasp	-3.76743	-3.71981		VASP_strain_mp-1232420_1x1x1_-0.02_0.03_0.02.vasp	-3.76743	-3.68978
VASP_strain_mp-1265_1x1x1_-0.01_0.02_0.03.vasp	-5.91943	-5.70522		VASP_strain_mp-1265_1x1x1_-0.01_0.02_0.03.vasp	-5.91943	-5.4924
VASP_strain_mp-1269_1x1x1_0.03_-0.01_0.02.vasp	-6.39817	-6.33765		VASP_strain_mp-1269_1x1x1_0.03_-0.01_0.02.vasp	-6.39817	-6.35197
VASP_strain_mp-12723_1x1x1_-0.02_-0.05_-0.05.vasp	-3.31575	-3.50316		VASP_strain_mp-12723_1x1x1_-0.02_-0.05_-0.05.vasp	-3.31575	-3.56371
VASP_strain_mp-12910_1x1x1_0.03_0.01_-0.01.vasp	-4.52811	-4.44761		VASP_strain_mp-12910_1x1x1_0.03_0.01_-0.01.vasp	-4.52811	-4.38841
VASP_strain_mp-1315_1x1x1_0.04_0.01_0.03.vasp	-4.21986	-4.15626		VASP_strain_mp-1315_1x1x1_0.04_0.01_0.03.vasp	-4.21986	-4.08473
VASP_strain_mp-133_1x1x1_-0.01_0.01_-0.05.vasp	-4.06103	-4.26792		VASP_strain_mp-133_1x1x1_-0.01_0.01_-0.05.vasp	-4.06103	-4.25217
VASP_strain_mp-1471_1x1x1_-0.03_-0.03_-0.02.vasp	-7.58256	-7.8178		VASP_strain_mp-1471_1x1x1_-0.03_-0.03_-0.02.vasp	-7.58256	-7.79269
VASP_strain_mp-1487_1x1x1_0.04_-0.02_0.04.vasp	-5.25225	-5.09001		VASP_strain_mp-1487_1x1x1_0.04_-0.02_0.04.vasp	-5.25225	-5.06203
VASP_strain_mp-1540935_1x1x1_0.05_0.05_-0.01.vasp	-2.84271	-2.85457		VASP_strain_mp-1540935_1x1x1_0.05_0.05_-0.01.vasp	-2.84271	-2.81141
VASP_strain_mp-157_1x1x1_-0.05_-0.05_0.04.vasp	-5.31634	-5.46693		VASP_strain_mp-157_1x1x1_-0.05_-0.05_0.04.vasp	-5.31634	-5.51523
VASP_strain_mp-16246_1x1x1_-0.02_-0.05_0.03.vasp	-2.8014	-2.89421		VASP_strain_mp-16246_1x1x1_-0.02_-0.05_0.03.vasp	-2.8014	-2.86875
VASP_strain_mp-1696_1x1x1_0.01_0.03_-0.02.vasp	-3.37763	-3.34289		VASP_strain_mp-1696_1x1x1_0.01_0.03_-0.02.vasp	-3.37763	-3.34296
VASP_strain_mp-1708_1x1x1_-0.02_-0.03_-0.05.vasp	-6.04779	-6.25155		VASP_strain_mp-1708_1x1x1_-0.02_-0.03_-0.05.vasp	-6.04779	-6.13477
VASP_strain_mp-1730_1x1x1_0.05_0.02_0.03.vasp	-3.78036	-3.61395		VASP_strain_mp-1730_1x1x1_0.05_0.02_0.03.vasp	-3.78036	-3.60119
VASP_strain_mp-19419_1x1x1_-0.02_0.02_-0.03.vasp	-6.56499	-6.55789		VASP_strain_mp-19419_1x1x1_-0.02_0.02_-0.03.vasp	-6.56499	-6.49712
VASP_strain_mp-19764_1x1x1_0.01_0.03_0.05.vasp	-4.44156	-4.37563		VASP_strain_mp-19764_1x1x1_0.01_0.03_0.05.vasp	-4.44156	-4.35471
VASP_strain_mp-2017_1x1x1_-0.01_0.01_0.03.vasp	-6.0137	-5.99249		VASP_strain_mp-2017_1x1x1_-0.01_0.01_0.03.vasp	-6.0137	-5.99349
VASP_strain_mp-2050_1x1x1_0.04_0.01_-0.01.vasp	-5.41707	-5.37618		VASP_strain_mp-2050_1x1x1_0.04_0.01_-0.01.vasp	-5.41707	-5.3409
VASP_strain_mp-20582_1x1x1_-0.05_-0.01_-0.02.vasp	-4.21163	-4.37051		VASP_strain_mp-20582_1x1x1_-0.05_-0.01_-0.02.vasp	-4.21163	-4.35761
VASP_strain_mp-2076_1x1x1_-0.05_-0.02_-0.05.vasp	-6.49903	-6.59645		VASP_strain_mp-2076_1x1x1_-0.05_-0.02_-0.05.vasp	-6.49903	-6.58738
VASP_strain_mp-20864_1x1x1_-0.04_-0.04_0.05.vasp	-6.01992	-6.22645		VASP_strain_mp-20864_1x1x1_-0.04_-0.04_0.05.vasp	-6.01992	-6.21358
VASP_strain_mp-21171_1x1x1_0.03_-0.02_0.03.vasp	-6.68169	-6.63165		VASP_strain_mp-21171_1x1x1_0.03_-0.02_0.03.vasp	-6.68169	-6.55477
VASP_strain_mp-21462_1x1x1_0.04_0.03_-0.05.vasp	-10.198	-10.2257		VASP_strain_mp-21462_1x1x1_0.04_0.03_-0.05.vasp	-10.198	-10.1984
VASP_strain_mp-23156_1x1x1_-0.01_0.01_-0.05.vasp	-0.00472204	-0.0610679		VASP_strain_mp-23156_1x1x1_-0.01_0.01_-0.05.vasp	-0.00472204	-0.237273
VASP_strain_mp-23202_1x1x1_0.04_0.02_0.03.vasp	-2.51511	-2.47503		VASP_strain_mp-23202_1x1x1_0.04_0.02_0.03.vasp	-2.51511	-2.51496
VASP_strain_mp-24669_1x1x1_-0.02_0.02_0.05.vasp	-6.24623	-6.05096		VASP_strain_mp-24669_1x1x1_-0.02_0.02_0.05.vasp	-6.24623	-6.17376
VASP_strain_mp-25223_1x1x1_-0.03_-0.04_-0.02.vasp	-7.90485	-7.91873		VASP_strain_mp-25223_1x1x1_-0.03_-0.04_-0.02.vasp	-7.90485	-7.94723
VASP_strain_mp-2540_1x1x1_0.02_-0.04_0.04.vasp	-9.98134	-9.90853		VASP_strain_mp-2540_1x1x1_0.02_-0.04_0.04.vasp	-9.98134	-9.90944
VASP_strain_mp-2564_1x1x1_0.05_-0.01_-0.05.vasp	-1.62425	-1.61633		VASP_strain_mp-2564_1x1x1_0.05_-0.01_-0.05.vasp	-1.62425	-1.57726
VASP_strain_mp-2619_1x1x1_-0.01_0.01_-0.03.vasp	-6.16635	-6.25013		VASP_strain_mp-2619_1x1x1_-0.01_0.01_-0.03.vasp	-6.16635	-6.24241
VASP_strain_mp-27639_1x1x1_-0.02_0.02_0.04.vasp	-1.65948	-1.65369		VASP_strain_mp-27639_1x1x1_-0.02_0.02_0.04.vasp	-1.65948	-1.59597
VASP_strain_mp-29868_1x1x1_-0.02_0.04_0.02.vasp	-5.66961	-5.6498		VASP_strain_mp-29868_1x1x1_-0.02_0.04_0.02.vasp	-5.66961	-5.59406
VASP_strain_mp-30580_1x1x1_0.02_0.01_-0.04.vasp	-3.2526	-3.24613		VASP_strain_mp-30580_1x1x1_0.02_0.01_-0.04.vasp	-3.2526	-3.32533
VASP_strain_mp-30606_1x1x1_0.04_0.02_-0.03.vasp	-5.17803	-5.13665		VASP_strain_mp-30606_1x1x1_0.04_0.02_-0.03.vasp	-5.17803	-5.15506
VASP_strain_mp-31208_1x1x1_0.02_0.02_-0.05.vasp	-4.25367	-4.35074		VASP_strain_mp-31208_1x1x1_0.02_0.02_-0.05.vasp	-4.25367	-4.27507
VASP_strain_mp-32641_1x1x1_-0.05_0.01_-0.01.vasp	-3.53719	-3.54998		VASP_strain_mp-32641_1x1x1_-0.05_0.01_-0.01.vasp	-3.53719	-3.57707
VASP_strain_mp-3664_1x1x1_-0.05_-0.01_0.05.vasp	-5.23066	-5.27882		VASP_strain_mp-3664_1x1x1_-0.05_-0.01_0.05.vasp	-5.23066	-5.27769
VASP_strain_mp-3740_1x1x1_0.02_0.02_-0.05.vasp	-6.05995	-6.10234		VASP_strain_mp-3740_1x1x1_0.02_0.02_-0.05.vasp	-6.05995	-6.10046
VASP_strain_mp-404_1x1x1_0.05_-0.02_-0.04.vasp	-6.13053	-6.14865		VASP_strain_mp-404_1x1x1_0.05_-0.02_-0.04.vasp	-6.13053	-6.13859
VASP_strain_mp-429_1x1x1_-0.05_0.03_-0.02.vasp	-3.51753	-3.6255		VASP_strain_mp-429_1x1x1_-0.05_0.03_-0.02.vasp	-3.51753	-3.60128
VASP_strain_mp-447_1x1x1_-0.01_0.03_0.04.vasp	-4.71632	-4.65345		VASP_strain_mp-447_1x1x1_-0.01_0.03_0.04.vasp	-4.71632	-4.61046
VASP_strain_mp-4552_1x1x1_0.01_0.04_0.03.vasp	-3.94707	-3.87264		VASP_strain_mp-4552_1x1x1_0.01_0.04_0.03.vasp	-3.94707	-3.82854
VASP_strain_mp-4587_1x1x1_-0.03_-0.03_-0.01.vasp	-7.42496	-7.56269		VASP_strain_mp-4587_1x1x1_-0.03_-0.03_-0.01.vasp	-7.42496	-7.59916
VASP_strain_mp-505569_1x1x1_-0.05_0.03_-0.04.vasp	-4.72023	-4.85124		VASP_strain_mp-505569_1x1x1_-0.05_0.03_-0.04.vasp	-4.72023	-4.81303
VASP_strain_mp-5106_1x1x1_-0.03_0.03_-0.03.vasp	-7.82842	-7.84066		VASP_strain_mp-5106_1x1x1_-0.03_0.03_-0.03.vasp	-7.82842	-7.85971
VASP_strain_mp-542_1x1x1_-0.01_0.01_-0.03.vasp	-1.45141	-1.45866		VASP_strain_mp-542_1x1x1_-0.01_0.01_-0.03.vasp	-1.45141	-1.47838
VASP_strain_mp-560676_1x1x1_0.03_-0.01_0.03.vasp	-5.47497	-5.4737		VASP_strain_mp-560676_1x1x1_0.03_-0.01_0.03.vasp	-5.47497	-5.49026
VASP_strain_mp-567409_1x1x1_0.04_-0.04_0.05.vasp	-4.08109	-4.07041		VASP_strain_mp-567409_1x1x1_0.04_-0.04_0.05.vasp	-4.08109	-4.08599
VASP_strain_mp-568042_1x1x1_-0.01_-0.05_-0.01.vasp	-9.52706	-9.63306		VASP_strain_mp-568042_1x1x1_-0.01_-0.05_-0.01.vasp	-9.52706	-9.48318
VASP_strain_mp-571484_1x1x1_0.02_-0.01_0.03.vasp	-1.68545	-1.6955		VASP_strain_mp-571484_1x1x1_0.02_-0.01_0.03.vasp	-1.68545	-1.68704
VASP_strain_mp-627_1x1x1_-0.04_0.04_-0.03.vasp	-9.13099	-9.31214		VASP_strain_mp-627_1x1x1_-0.04_0.04_-0.03.vasp	-9.13099	-9.05793
VASP_strain_mp-631343_1x1x1_-0.05_-0.04_0.01.vasp	-9.91985	-10.2019		VASP_strain_mp-631343_1x1x1_-0.05_-0.04_0.01.vasp	-9.91985	-10.6428
VASP_strain_mp-631395_1x1x1_0.05_-0.04_0.05.vasp	-6.95223	-6.82139		VASP_strain_mp-631395_1x1x1_0.05_-0.04_0.05.vasp	-6.95223	-6.47307
VASP_strain_mp-631464_1x1x1_-0.02_-0.04_-0.05.vasp	-2.86227	-2.92501		VASP_strain_mp-631464_1x1x1_-0.02_-0.04_-0.05.vasp	-2.86227	-3.10534
VASP_strain_mp-631523_1x1x1_-0.05_0.02_-0.02.vasp	-8.9076	-8.90847		VASP_strain_mp-631523_1x1x1_-0.05_0.02_-0.02.vasp	-8.9076	-8.92752
VASP_strain_mp-631525_1x1x1_0.02_-0.05_-0.03.vasp	-1.18697	-1.42747		VASP_strain_mp-631525_1x1x1_0.02_-0.05_-0.03.vasp	-1.18697	-1.46057
VASP_strain_mp-631556_1x1x1_0.05_-0.03_0.05.vasp	-4.14337	-4.33336		VASP_strain_mp-631556_1x1x1_0.05_-0.03_0.05.vasp	-4.14337	-4.39811
VASP_strain_mp-632413_1x1x1_-0.01_0.02_0.01.vasp	-4.08393	-4.0649		VASP_strain_mp-632413_1x1x1_-0.01_0.02_0.01.vasp	-4.08393	-4.02301
VASP_strain_mp-639736_1x1x1_-0.04_-0.02_-0.02.vasp	-0.87591	-0.883454		VASP_strain_mp-639736_1x1x1_-0.04_-0.02_-0.02.vasp	-0.87591	-0.969731
VASP_strain_mp-68_1x1x1_0.02_0.05_-0.02.vasp	-4.60939	-4.55384		VASP_strain_mp-68_1x1x1_0.02_0.05_-0.02.vasp	-4.60939	-4.55846
VASP_strain_mp-742_1x1x1_-0.05_-0.04_-0.02.vasp	-6.48604	-6.79006		VASP_strain_mp-742_1x1x1_-0.05_-0.04_-0.02.vasp	-6.48604	-6.74125
VASP_strain_mp-752767_1x1x1_-0.01_-0.02_0.04.vasp	-4.01496	-3.96801		VASP_strain_mp-752767_1x1x1_-0.01_-0.02_0.04.vasp	-4.01496	-3.89113
VASP_strain_mp-754125_1x1x1_-0.01_-0.03_-0.03.vasp	-7.44501	-7.62985		VASP_strain_mp-754125_1x1x1_-0.01_-0.03_-0.03.vasp	-7.44501	-7.66099
VASP_strain_mp-754382_1x1x1_0.03_0.05_0.02.vasp	-0.00769543	0.00407254		VASP_strain_mp-754382_1x1x1_0.03_0.05_0.02.vasp	-0.00769543	0.033475
VASP_strain_mp-762_1x1x1_-0.01_-0.02_0.03.vasp	-5.14447	-5.1134		VASP_strain_mp-762_1x1x1_-0.01_-0.02_0.03.vasp	-5.14447	-5.01515
VASP_strain_mp-7754_1x1x1_-0.05_-0.03_-0.04.vasp	-6.97173	-7.47328		VASP_strain_mp-7754_1x1x1_-0.05_-0.03_-0.04.vasp	-6.97173	-7.45531
VASP_strain_mp-790_1x1x1_-0.03_0.03_-0.05.vasp	-6.71959	-6.86568		VASP_strain_mp-790_1x1x1_-0.03_0.03_-0.05.vasp	-6.71959	-6.84242
VASP_strain_mp-82_1x1x1_-0.02_0.01_0.04.vasp	-2.21837	-2.22632		VASP_strain_mp-82_1x1x1_-0.02_0.01_0.04.vasp	-2.21837	-2.19642
VASP_strain_mp-8584_1x1x1_0.02_0.05_0.04.vasp	-4.86851	-4.77367		VASP_strain_mp-8584_1x1x1_0.02_0.05_0.04.vasp	-4.86851	-4.79549
VASP_strain_mp-861652_1x1x1_-0.01_0.05_-0.01.vasp	-5.60152	-5.54319		VASP_strain_mp-861652_1x1x1_-0.01_0.05_-0.01.vasp	-5.60152	-5.54964
VASP_strain_mp-861654_1x1x1_0.01_0.05_-0.01.vasp	-5.17754	-5.11158		VASP_strain_mp-861654_1x1x1_0.01_0.05_-0.01.vasp	-5.17754	-5.11405
VASP_strain_mp-861657_1x1x1_0.03_0.04_-0.02.vasp	-3.2484	-3.22732		VASP_strain_mp-861657_1x1x1_0.03_0.04_-0.02.vasp	-3.2484	-3.19548
VASP_strain_mp-861983_1x1x1_0.01_0.03_0.02.vasp	-8.52438	-8.23155		VASP_strain_mp-861983_1x1x1_0.01_0.03_0.02.vasp	-8.52438	-8.48727
VASP_strain_mp-862288_1x1x1_0.01_-0.02_-0.05.vasp	-8.46163	-8.66507		VASP_strain_mp-862288_1x1x1_0.01_-0.02_-0.05.vasp	-8.46163	-8.59136
VASP_strain_mp-862338_1x1x1_-0.05_0.02_0.02.vasp	-6.79504	-6.8344		VASP_strain_mp-862338_1x1x1_-0.05_0.02_0.02.vasp	-6.79504	-6.81834
VASP_strain_mp-862614_1x1x1_-0.01_-0.03_-0.01.vasp	-5.32116	-5.40995		VASP_strain_mp-862614_1x1x1_-0.01_-0.03_-0.01.vasp	-5.32116	-5.43517
VASP_strain_mp-862684_1x1x1_-0.01_-0.03_0.04.vasp	-8.6272	-8.64941		VASP_strain_mp-862684_1x1x1_-0.01_-0.03_0.04.vasp	-8.6272	-8.62938
VASP_strain_mp-862716_1x1x1_-0.03_0.05_-0.02.vasp	-2.65875	-2.65405		VASP_strain_mp-862716_1x1x1_-0.03_0.05_-0.02.vasp	-2.65875	-2.65677
VASP_strain_mp-862821_1x1x1_-0.02_0.04_-0.04.vasp	-5.32696	-5.40583		VASP_strain_mp-862821_1x1x1_-0.02_0.04_-0.04.vasp	-5.32696	-5.418
VASP_strain_mp-862929_1x1x1_-0.02_0.05_0.05.vasp	-3.21968	-3.17769		VASP_strain_mp-862929_1x1x1_-0.02_0.05_0.05.vasp	-3.21968	-3.16514
VASP_strain_mp-863651_1x1x1_0.04_0.04_0.04.vasp	-3.43034	-3.35145		VASP_strain_mp-863651_1x1x1_0.04_0.04_0.04.vasp	-3.43034	-3.29106
VASP_strain_mp-863652_1x1x1_-0.03_0.04_-0.02.vasp	-5.47392	-5.53109		VASP_strain_mp-863652_1x1x1_-0.03_0.04_-0.02.vasp	-5.47392	-5.51735
VASP_strain_mp-864611_1x1x1_-0.05_-0.02_-0.04.vasp	-6.88714	-7.23638		VASP_strain_mp-864611_1x1x1_-0.05_-0.02_-0.04.vasp	-6.88714	-7.28329
VASP_strain_mp-864615_1x1x1_-0.02_-0.04_-0.02.vasp	-5.44897	-5.68216		VASP_strain_mp-864615_1x1x1_-0.02_-0.04_-0.02.vasp	-5.44897	-5.71578
VASP_strain_mp-864620_1x1x1_0.05_0.02_-0.02.vasp	-2.36037	-2.33021		VASP_strain_mp-864620_1x1x1_0.05_0.02_-0.02.vasp	-2.36037	-2.28442
VASP_strain_mp-864646_1x1x1_-0.05_0.02_0.05.vasp	-2.19247	-2.25567		VASP_strain_mp-864646_1x1x1_-0.05_0.02_0.05.vasp	-2.19247	-2.22785
VASP_strain_mp-864653_1x1x1_0.01_-0.03_0.05.vasp	-3.88885	-3.87552		VASP_strain_mp-864653_1x1x1_0.01_-0.03_0.05.vasp	-3.88885	-3.87861
VASP_strain_mp-864696_1x1x1_-0.01_-0.04_0.02.vasp	-6.96079	-7.05412		VASP_strain_mp-864696_1x1x1_-0.01_-0.04_0.02.vasp	-6.96079	-7.0409
VASP_strain_mp-864990_1x1x1_-0.04_0.01_0.02.vasp	-8.85531	-8.91272		VASP_strain_mp-864990_1x1x1_-0.04_0.01_0.02.vasp	-8.85531	-8.9241
VASP_strain_mp-864992_1x1x1_-0.02_0.03_0.03.vasp	-9.48899	-9.35154		VASP_strain_mp-864992_1x1x1_-0.02_0.03_0.03.vasp	-9.48899	-9.2852
VASP_strain_mp-865043_1x1x1_0.01_-0.02_0.05.vasp	-4.26116	-4.1898		VASP_strain_mp-865043_1x1x1_0.01_-0.02_0.05.vasp	-4.26116	-4.21636
VASP_strain_mp-865048_1x1x1_0.01_-0.03_-0.04.vasp	-7.28103	-7.59705		VASP_strain_mp-865048_1x1x1_0.01_-0.03_-0.04.vasp	-7.28103	-7.42411
VASP_strain_mp-865159_1x1x1_0.04_-0.02_0.02.vasp	-3.83851	-3.80263		VASP_strain_mp-865159_1x1x1_0.04_-0.02_0.02.vasp	-3.83851	-3.77473
VASP_strain_mp-865210_1x1x1_0.02_0.05_-0.01.vasp	-3.01366	-2.98075		VASP_strain_mp-865210_1x1x1_0.02_0.05_-0.01.vasp	-3.01366	-2.93851
VASP_strain_mp-865230_1x1x1_-0.01_0.02_0.04.vasp	-5.84672	-5.77096		VASP_strain_mp-865230_1x1x1_-0.01_0.02_0.04.vasp	-5.84672	-5.73384
VASP_strain_mp-865271_1x1x1_-0.01_-0.03_-0.01.vasp	-5.88006	-5.97052		VASP_strain_mp-865271_1x1x1_-0.01_-0.03_-0.01.vasp	-5.88006	-6.00196
VASP_strain_mp-865355_1x1x1_0.01_-0.05_0.01.vasp	-2.72812	-2.79806		VASP_strain_mp-865355_1x1x1_0.01_-0.05_0.01.vasp	-2.72812	-2.81298
VASP_strain_mp-865432_1x1x1_-0.03_0.02_0.02.vasp	-7.42701	-7.40953		VASP_strain_mp-865432_1x1x1_-0.03_0.02_0.02.vasp	-7.42701	-7.40941
VASP_strain_mp-865441_1x1x1_-0.02_-0.05_-0.02.vasp	-6.17537	-6.51575		VASP_strain_mp-865441_1x1x1_-0.02_-0.05_-0.02.vasp	-6.17537	-6.49681
VASP_strain_mp-865529_1x1x1_-0.02_0.04_0.04.vasp	-8.09376	-7.95159		VASP_strain_mp-865529_1x1x1_-0.02_0.04_0.04.vasp	-8.09376	-7.98097
VASP_strain_mp-865562_1x1x1_-0.01_-0.05_-0.02.vasp	-5.40973	-5.58557		VASP_strain_mp-865562_1x1x1_-0.01_-0.05_-0.02.vasp	-5.40973	-5.48449
VASP_strain_mp-865591_1x1x1_-0.02_0.03_0.02.vasp	-8.26661	-8.15447		VASP_strain_mp-865591_1x1x1_-0.02_0.03_0.02.vasp	-8.26661	-8.18572
VASP_strain_mp-865591_1x1x1_0.03_0.01_0.03.vasp	-8.24869	-8.00959		VASP_strain_mp-865591_1x1x1_0.03_0.01_0.03.vasp	-8.24869	-8.05714
VASP_strain_mp-865629_1x1x1_0.01_0.05_-0.01.vasp	-3.43837	-3.42327		VASP_strain_mp-865629_1x1x1_0.01_0.05_-0.01.vasp	-3.43837	-3.43348
VASP_strain_mp-865709_1x1x1_-0.02_0.01_0.04.vasp	-3.10779	-3.08854		VASP_strain_mp-865709_1x1x1_-0.02_0.01_0.04.vasp	-3.10779	-3.10067
VASP_strain_mp-865709_1x1x1_0.04_0.04_0.02.vasp	-3.08505	-3.02153		VASP_strain_mp-865709_1x1x1_0.04_0.04_0.02.vasp	-3.08505	-3.04205
VASP_strain_mp-865875_1x1x1_-0.05_-0.03_0.02.vasp	-2.25286	-2.3042		VASP_strain_mp-865875_1x1x1_-0.05_-0.03_0.02.vasp	-2.25286	-2.33411
VASP_strain_mp-866001_1x1x1_0.05_0.05_0.03.vasp	-8.26398	-7.86627		VASP_strain_mp-866001_1x1x1_0.05_0.05_0.03.vasp	-8.26398	-7.8563
VASP_strain_mp-866013_1x1x1_-0.04_-0.04_0.02.vasp	-3.04417	-3.13579		VASP_strain_mp-866013_1x1x1_-0.04_-0.04_0.02.vasp	-3.04417	-3.13734
VASP_strain_mp-866176_1x1x1_0.04_0.04_-0.02.vasp	-3.54949	-3.5077		VASP_strain_mp-866176_1x1x1_0.04_0.04_-0.02.vasp	-3.54949	-3.53264
VASP_strain_mp-866197_1x1x1_-0.04_-0.03_-0.01.vasp	-3.36392	-3.48903		VASP_strain_mp-866197_1x1x1_-0.04_-0.03_-0.01.vasp	-3.36392	-3.47618
VASP_strain_mp-867138_1x1x1_-0.02_-0.02_0.02.vasp	-5.76718	-5.74192		VASP_strain_mp-867138_1x1x1_-0.02_-0.02_0.02.vasp	-5.76718	-5.78007
VASP_strain_mp-867164_1x1x1_0.04_0.02_0.04.vasp	-4.88075	-4.75539		VASP_strain_mp-867164_1x1x1_0.04_0.02_0.04.vasp	-4.88075	-4.7292
VASP_strain_mp-867169_1x1x1_-0.03_0.01_0.05.vasp	-2.46158	-2.45953		VASP_strain_mp-867169_1x1x1_-0.03_0.01_0.05.vasp	-2.46158	-2.3891
VASP_strain_mp-867176_1x1x1_0.03_-0.04_0.05.vasp	-3.59854	-3.59984		VASP_strain_mp-867176_1x1x1_0.03_-0.04_0.05.vasp	-3.59854	-3.5669
VASP_strain_mp-867217_1x1x1_0.05_0.02_0.02.vasp	-2.27681	-2.22409		VASP_strain_mp-867217_1x1x1_0.05_0.02_0.02.vasp	-2.27681	-2.1642
VASP_strain_mp-867265_1x1x1_0.03_0.02_-0.04.vasp	-5.79619	-5.81503		VASP_strain_mp-867265_1x1x1_0.03_0.02_-0.04.vasp	-5.79619	-5.78765
VASP_strain_mp-867333_1x1x1_0.04_0.03_-0.03.vasp	-2.5019	-2.47005		VASP_strain_mp-867333_1x1x1_0.04_0.03_-0.03.vasp	-2.5019	-2.42742
VASP_strain_mp-867798_1x1x1_-0.03_-0.05_0.04.vasp	-5.60071	-5.72949		VASP_strain_mp-867798_1x1x1_-0.03_-0.05_0.04.vasp	-5.60071	-5.71946
VASP_strain_mp-867801_1x1x1_0.05_0.04_-0.03.vasp	-4.60044	-4.5535		VASP_strain_mp-867801_1x1x1_0.05_0.04_-0.03.vasp	-4.60044	-4.52252
VASP_strain_mp-867979_1x1x1_-0.05_0.01_-0.02.vasp	-2.40826	-2.50054		VASP_strain_mp-867979_1x1x1_-0.05_0.01_-0.02.vasp	-2.40826	-2.50161
VASP_strain_mp-867985_1x1x1_0.01_-0.01_-0.02.vasp	-4.26072	-4.30942		VASP_strain_mp-867985_1x1x1_0.01_-0.01_-0.02.vasp	-4.26072	-4.29615
VASP_strain_mp-8881_1x1x1_-0.04_-0.04_0.02.vasp	-4.64983	-4.71767		VASP_strain_mp-8881_1x1x1_-0.04_-0.04_0.02.vasp	-4.64983	-4.71711
VASP_strain_mp-9166_1x1x1_0.01_-0.03_0.05.vasp	-7.43449	-7.64338		VASP_strain_mp-9166_1x1x1_0.01_-0.03_0.05.vasp	-7.43449	-7.41282
VASP_strain_mp-9367_1x1x1_-0.03_0.05_-0.05.vasp	-5.23559	-5.27034		VASP_strain_mp-9367_1x1x1_-0.03_0.05_-0.05.vasp	-5.23559	-5.32286
VASP_strain_mp-961678_1x1x1_-0.05_0.04_-0.02.vasp	-6.21418	-6.36062		VASP_strain_mp-961678_1x1x1_-0.05_0.04_-0.02.vasp	-6.21418	-6.26159
VASP_strain_mp-971631_1x1x1_0.05_-0.01_-0.01.vasp	-3.9566	-3.92378		VASP_strain_mp-971631_1x1x1_0.05_-0.01_-0.01.vasp	-3.9566	-3.93094
VASP_strain_mp-971712_1x1x1_0.05_0.01_0.05.vasp	-3.18057	-3.083		VASP_strain_mp-971712_1x1x1_0.05_0.01_0.05.vasp	-3.18057	-3.05814
VASP_strain_mp-971875_1x1x1_-0.04_-0.01_0.03.vasp	-7.11516	-7.05544		VASP_strain_mp-971875_1x1x1_-0.04_-0.01_0.03.vasp	-7.11516	-7.19954
VASP_strain_mp-972088_1x1x1_0.04_0.04_0.05.vasp	-6.69369	-6.47873		VASP_strain_mp-972088_1x1x1_0.04_0.04_0.05.vasp	-6.69369	-6.39323
VASP_strain_mp-972324_1x1x1_0.02_0.04_-0.03.vasp	-8.72702	-8.78645		VASP_strain_mp-972324_1x1x1_0.02_0.04_-0.03.vasp	-8.72702	-8.53567
VASP_strain_mp-972400_1x1x1_-0.02_0.04_-0.03.vasp	-5.41438	-5.48485		VASP_strain_mp-972400_1x1x1_-0.02_0.04_-0.03.vasp	-5.41438	-5.46937
VASP_strain_mp-972908_1x1x1_-0.01_0.01_0.01.vasp	-4.7843	-4.78829		VASP_strain_mp-972908_1x1x1_-0.01_0.01_0.01.vasp	-4.7843	-4.76934
VASP_strain_mp-973254_1x1x1_-0.04_-0.02_0.01.vasp	-2.96842	-3.04709		VASP_strain_mp-973254_1x1x1_-0.04_-0.02_0.01.vasp	-2.96842	-3.06724
VASP_strain_mp-973339_1x1x1_-0.05_0.02_-0.03.vasp	-5.1389	-5.22424		VASP_strain_mp-973339_1x1x1_-0.05_0.02_-0.03.vasp	-5.1389	-5.25377
VASP_strain_mp-973433_1x1x1_-0.03_0.02_0.05.vasp	-7.7192	-7.66866		VASP_strain_mp-973433_1x1x1_-0.03_0.02_0.05.vasp	-7.7192	-7.65929
VASP_strain_mp-973544_1x1x1_-0.02_-0.02_0.02.vasp	-6.14692	-6.2233		VASP_strain_mp-973544_1x1x1_-0.02_-0.02_0.02.vasp	-6.14692	-6.15637
VASP_strain_mp-973557_1x1x1_0.02_0.04_-0.01.vasp	-4.30356	-4.23222		VASP_strain_mp-973557_1x1x1_0.02_0.04_-0.01.vasp	-4.30356	-4.21989
VASP_strain_mp-973631_1x1x1_0.02_-0.04_-0.01.vasp	-5.86438	-5.9681		VASP_strain_mp-973631_1x1x1_0.02_-0.04_-0.01.vasp	-5.86438	-5.99783
VASP_strain_mp-973741_1x1x1_0.02_-0.03_0.01.vasp	-3.67657	-3.68987		VASP_strain_mp-973741_1x1x1_0.02_-0.03_0.01.vasp	-3.67657	-3.64578
VASP_strain_mp-974270_1x1x1_-0.02_0.01_-0.03.vasp	-1.74311	-1.78315		VASP_strain_mp-974270_1x1x1_-0.02_0.01_-0.03.vasp	-1.74311	-1.70827
VASP_strain_mp-974387_1x1x1_-0.01_-0.04_0.04.vasp	-3.44236	-3.48872		VASP_strain_mp-974387_1x1x1_-0.01_-0.04_0.04.vasp	-3.44236	-3.48649
VASP_strain_mp-974743_1x1x1_-0.04_0.03_-0.01.vasp	-2.03441	-2.0023		VASP_strain_mp-974743_1x1x1_-0.04_0.03_-0.01.vasp	-2.03441	-1.86628
VASP_strain_mp-974920_1x1x1_0.04_-0.02_-0.01.vasp	-1.31091	-1.30296		VASP_strain_mp-974920_1x1x1_0.04_-0.02_-0.01.vasp	-1.31091	-1.29249
VASP_strain_mp-975013_1x1x1_0.02_-0.01_-0.05.vasp	-1.20547	-1.18718		VASP_strain_mp-975013_1x1x1_0.02_-0.01_-0.05.vasp	-1.20547	-1.19927
VASP_strain_mp-975052_1x1x1_-0.02_0.04_-0.05.vasp	-1.29529	-1.29789		VASP_strain_mp-975052_1x1x1_-0.02_0.04_-0.05.vasp	-1.29529	-1.34351
VASP_strain_mp-975368_1x1x1_0.03_-0.05_-0.04.vasp	-1.83224	-1.88018		VASP_strain_mp-975368_1x1x1_0.03_-0.05_-0.04.vasp	-1.83224	-1.87108
VASP_strain_mp-975411_1x1x1_0.01_0.03_-0.05.vasp	-2.08137	-2.09807		VASP_strain_mp-975411_1x1x1_0.01_0.03_-0.05.vasp	-2.08137	-2.2007
VASP_strain_mp-975512_1x1x1_-0.04_-0.03_0.05.vasp	-3.55409	-3.63133		VASP_strain_mp-975512_1x1x1_-0.04_-0.03_0.05.vasp	-3.55409	-3.64803
VASP_strain_mp-975524_1x1x1_0.03_-0.01_-0.04.vasp	-3.73496	-3.75065		VASP_strain_mp-975524_1x1x1_0.03_-0.01_-0.04.vasp	-3.73496	-3.78104
VASP_strain_mp-975644_1x1x1_-0.02_-0.05_0.02.vasp	-3.24794	-3.32469		VASP_strain_mp-975644_1x1x1_-0.02_-0.05_0.02.vasp	-3.24794	-3.41849
VASP_strain_mp-975664_1x1x1_-0.02_0.04_-0.05.vasp	-4.95075	-5.03974		VASP_strain_mp-975664_1x1x1_-0.02_0.04_-0.05.vasp	-4.95075	-4.9777
VASP_strain_mp-975994_1x1x1_0.04_0.04_0.03.vasp	-3.74434	-3.71694		VASP_strain_mp-975994_1x1x1_0.04_0.04_0.03.vasp	-3.74434	-3.62696
VASP_strain_mp-975994_1x1x1_0.05_0.02_-0.03.vasp	-3.76722	-3.76257		VASP_strain_mp-975994_1x1x1_0.05_0.02_-0.03.vasp	-3.76722	-3.71527
VASP_strain_mp-976272_1x1x1_0.02_-0.03_-0.05.vasp	-1.84731	-1.8888		VASP_strain_mp-976272_1x1x1_0.02_-0.03_-0.05.vasp	-1.84731	-1.89611
VASP_strain_mp-976828_1x1x1_-0.04_-0.01_-0.02.vasp	-3.0301	-3.09909		VASP_strain_mp-976828_1x1x1_-0.04_-0.01_-0.02.vasp	-3.0301	-3.07537
VASP_strain_mp-977463_1x1x1_0.03_0.04_-0.02.vasp	-6.52116	-6.46899		VASP_strain_mp-977463_1x1x1_0.03_0.04_-0.02.vasp	-6.52116	-6.47492
VASP_strain_mp-977535_1x1x1_0.05_-0.01_-0.03.vasp	-3.7481	-3.77037		VASP_strain_mp-977535_1x1x1_0.05_-0.01_-0.03.vasp	-3.7481	-3.74506
VASP_strain_mp-977556_1x1x1_0.05_-0.04_-0.02.vasp	-2.538	-2.55525		VASP_strain_mp-977556_1x1x1_0.05_-0.04_-0.02.vasp	-2.538	-2.61045
VASP_strain_mp-978096_1x1x1_-0.03_0.01_-0.04.vasp	-11.1141	-11.0623		VASP_strain_mp-978096_1x1x1_-0.03_0.01_-0.04.vasp	-11.1141	-11.4276
VASP_strain_mp-980661_1x1x1_0.05_-0.02_0.02.vasp	-3.74772	-3.7328		VASP_strain_mp-980661_1x1x1_0.05_-0.02_0.02.vasp	-3.74772	-3.73229
VASP_strain_mp-981544_1x1x1_0.02_-0.04_-0.05.vasp	-4.69274	-4.73469		VASP_strain_mp-981544_1x1x1_0.02_-0.04_-0.05.vasp	-4.69274	-4.73141
VASP_strain_mp-982_1x1x1_-0.04_-0.02_0.02.vasp	-5.9222	-6.01114		VASP_strain_mp-982_1x1x1_-0.04_-0.02_0.02.vasp	-5.9222	-6.00283
VASP_strain_mp-982780_1x1x1_0.04_0.03_-0.05.vasp	-0.952022	-0.901526		VASP_strain_mp-982780_1x1x1_0.04_0.03_-0.05.vasp	-0.952022	-0.932502
VASP_strain_mp-983230_1x1x1_0.01_-0.03_-0.03.vasp	-3.11049	-3.30086		VASP_strain_mp-983230_1x1x1_0.01_-0.03_-0.03.vasp	-3.11049	-3.13934
VASP_strain_mp-983583_1x1x1_-0.02_-0.02_0.04.vasp	-3.75789	-3.77767		VASP_strain_mp-983583_1x1x1_-0.02_-0.02_0.04.vasp	-3.75789	-3.7479
VASP_strain_mp-983604_1x1x1_0.03_-0.03_-0.02.vasp	-4.92375	-4.95276		VASP_strain_mp-983604_1x1x1_0.03_-0.03_-0.02.vasp	-4.92375	-4.93497
VASP_strain_mp-984721_1x1x1_0.01_0.02_0.04.vasp	-5.42235	-5.27612		VASP_strain_mp-984721_1x1x1_0.01_0.02_0.04.vasp	-5.42235	-5.24514
VASP_strain_mp-985059_1x1x1_0.04_-0.01_0.01.vasp	-4.66479	-4.64283		VASP_strain_mp-985059_1x1x1_0.04_-0.01_0.01.vasp	-4.66479	-4.59194
VASP_strain_mp-985551_1x1x1_-0.02_-0.04_0.05.vasp	-6.19335	-6.27199		VASP_strain_mp-985551_1x1x1_-0.02_-0.04_0.05.vasp	-6.19335	-6.24349
VASP_strain_mp-996988_1x1x1_0.05_0.04_-0.01.vasp	-4.35683	-4.25907		VASP_strain_mp-996988_1x1x1_0.05_0.04_-0.01.vasp	-4.35683	-4.15014
VASP_strain_mp-996990_1x1x1_0.04_0.03_-0.02.vasp	-5.03176	-5.00476		VASP_strain_mp-996990_1x1x1_0.04_0.03_-0.02.vasp	-5.03176	-4.9923
VASP_strain_mp-997089_1x1x1_-0.04_0.02_0.01.vasp	-4.3935	-4.43409		VASP_strain_mp-997089_1x1x1_-0.04_0.02_0.01.vasp	-4.3935	-4.3633
VASP_strain_mp-998913_1x1x1_0.02_0.03_-0.01.vasp	-4.62324	-4.40003		VASP_strain_mp-998913_1x1x1_0.02_0.03_-0.01.vasp	-4.62324	-4.34095
VASP_strain_mp-998946_1x1x1_0.02_-0.02_0.01.vasp	-2.82774	-2.78207		VASP_strain_mp-998946_1x1x1_0.02_-0.02_0.01.vasp	-2.82774	-2.88932
VASP_strain_mp-998988_1x1x1_0.01_0.01_-0.03.vasp	-6.76131	-6.88405		VASP_strain_mp-998988_1x1x1_0.01_0.01_-0.03.vasp	-6.76131	-6.79228
VASP_strain_mp-999132_1x1x1_0.01_0.02_-0.03.vasp	-4.35605	-4.35744		VASP_strain_mp-999132_1x1x1_0.01_0.02_-0.03.vasp	-4.35605	-4.35237
VASP_strain_mp-999190_1x1x1_-0.01_0.03_0.02.vasp	-7.80632	-7.71485		VASP_strain_mp-999190_1x1x1_-0.01_0.03_0.02.vasp	-7.80632	-7.71708
VASP_strain_mp-999293_1x1x1_-0.03_-0.05_-0.03.vasp	-5.90283	-6.22366		VASP_strain_mp-999293_1x1x1_-0.03_-0.05_-0.03.vasp	-5.90283	-6.25575
VASP_strain_mp-999395_1x1x1_0.05_0.01_0.04.vasp	-9.51821	-9.02227		VASP_strain_mp-999395_1x1x1_0.05_0.01_0.04.vasp	-9.51821	-9.12222
VASP_strain_mp-999544_1x1x1_0.03_-0.03_-0.04.vasp	-4.27573	-4.35507		VASP_strain_mp-999544_1x1x1_0.03_-0.03_-0.04.vasp	-4.27573	-4.32127
VASP_strain_mp-999545_1x1x1_-0.03_-0.02_0.04.vasp	-8.67757	-8.67832		VASP_strain_mp-999545_1x1x1_-0.03_-0.02_0.04.vasp	-8.67757	-8.63347
				0.0923247

## Sheet: Uniaxial strains
structure	DFT Total energy/atom	DIEP Total energy/atom	DIEP Abs(error)	structure	DFT Total energy/atom	M3GNET Total energy/atom	M3GNET Abs(error)
VASP_strain_mp-18905_1x1x1_0.04.vasp	-7.42031	-7.32878	0.091531	VASP_strain_mp-18905_1x1x1_0.04.vasp	-7.42031	-7.29454	0.125771
VASP_strain_mp-864951_1x1x1_-0.03.vasp	-9.01535	-9.06844	0.0530879	VASP_strain_mp-864951_1x1x1_-0.03.vasp	-9.01535	-8.95164	0.0637043
VASP_strain_mp-1008526_1x1x1_0.05.vasp	-8.0414	-7.92574	0.115663	VASP_strain_mp-1008526_1x1x1_0.05.vasp	-8.0414	-7.69801	0.343394
VASP_strain_mp-2159_1x1x1_-0.01.vasp	-5.11698	-5.13625	0.0192704	VASP_strain_mp-2159_1x1x1_-0.01.vasp	-5.11698	-5.11418	0.0028011
VASP_strain_mp-1188059_1x1x1_0.03.vasp	-7.98965	-7.93446	0.0551921	VASP_strain_mp-1188059_1x1x1_0.03.vasp	-7.98965	-7.82947	0.16018
VASP_strain_mp-867781_1x1x1_0.02.vasp	-8.83572	-8.73135	0.104366	VASP_strain_mp-867781_1x1x1_0.02.vasp	-8.83572	-8.68377	0.151953
VASP_strain_mp-1217755_1x1x1_-0.01.vasp	-3.13694	-3.16491	0.0279684	VASP_strain_mp-1217755_1x1x1_-0.01.vasp	-3.13694	-3.07242	0.064517
VASP_strain_mp-862318_1x1x1_0.05.vasp	-4.17692	-4.08218	0.0947397	VASP_strain_mp-862318_1x1x1_0.05.vasp	-4.17692	-4.09282	0.084099
VASP_strain_mp-1183181_1x1x1_0.01.vasp	-3.0438	-3.0471	0.00329518	VASP_strain_mp-1183181_1x1x1_0.01.vasp	-3.0438	-3.04648	0.00267369
VASP_strain_mp-1009787_1x1x1_-0.03.vasp	-8.33165	-8.45984	0.128193	VASP_strain_mp-1009787_1x1x1_-0.03.vasp	-8.33165	-8.41904	0.0873895
VASP_strain_mp-966800_1x1x1_0.02.vasp	-4.19136	-4.13612	0.0552455	VASP_strain_mp-966800_1x1x1_0.02.vasp	-4.19136	-4.17823	0.0131331
VASP_strain_mp-978522_1x1x1_0.04.vasp	-7.88973	-7.79967	0.0900643	VASP_strain_mp-978522_1x1x1_0.04.vasp	-7.88973	-7.80527	0.0844599
VASP_strain_mp-13035_1x1x1_-0.02.vasp	-9.28631	-9.30891	0.022591	VASP_strain_mp-13035_1x1x1_-0.02.vasp	-9.28631	-9.47242	0.186107
VASP_strain_mp-10149_1x1x1_-0.05.vasp	-3.32027	-3.3793	0.059038	VASP_strain_mp-10149_1x1x1_-0.05.vasp	-3.32027	-3.4203	0.100035
VASP_strain_mp-1096728_1x1x1_0.02.vasp	-6.12935	-6.3246	0.195252	VASP_strain_mp-1096728_1x1x1_0.02.vasp	-6.12935	-6.28333	0.153981
VASP_strain_mp-1065583_1x1x1_-0.01.vasp	-5.94906	-5.96267	0.0136116	VASP_strain_mp-1065583_1x1x1_-0.01.vasp	-5.94906	-5.93862	0.0104382
VASP_strain_mp-1096534_1x1x1_-0.04.vasp	-4.27618	-4.39322	0.117038	VASP_strain_mp-1096534_1x1x1_-0.04.vasp	-4.27618	-4.355	0.0788181
VASP_strain_mp-1097383_1x1x1_0.04.vasp	-0.662183	-0.630633	0.0315505	VASP_strain_mp-1097383_1x1x1_0.04.vasp	-0.662183	-0.684992	0.0228084
VASP_strain_mp-2195_1x1x1_-0.03.vasp	-3.02009	-3.05939	0.0393013	VASP_strain_mp-2195_1x1x1_-0.03.vasp	-3.02009	-3.0744	0.0543091
VASP_strain_mp-982596_1x1x1_0.02.vasp	-5.36086	-5.35401	0.00685508	VASP_strain_mp-982596_1x1x1_0.02.vasp	-5.36086	-5.32554	0.0353225
VASP_strain_mp-1184093_1x1x1_0.04.vasp	-6.66794	-6.67576	0.00781724	VASP_strain_mp-1184093_1x1x1_0.04.vasp	-6.66794	-6.63538	0.032565
VASP_strain_mp-861880_1x1x1_0.05.vasp	-5.14387	-5.16936	0.025489	VASP_strain_mp-861880_1x1x1_0.05.vasp	-5.14387	-5.16654	0.0226676
VASP_strain_mp-861956_1x1x1_0.01.vasp	-5.47146	-5.44986	0.0216012	VASP_strain_mp-861956_1x1x1_0.01.vasp	-5.47146	-5.43014	0.0413225
VASP_strain_mp-867327_1x1x1_-0.05.vasp	-10.4583	-10.658	0.19968	VASP_strain_mp-867327_1x1x1_-0.05.vasp	-10.4583	-10.6939	0.235564
VASP_strain_mp-1188002_1x1x1_0.01.vasp	-10.1628	-10.1557	0.00711073	VASP_strain_mp-1188002_1x1x1_0.01.vasp	-10.1628	-10.0736	0.0892082
VASP_strain_mp-10688_1x1x1_-0.02.vasp	-8.32153	-8.36491	0.0433728	VASP_strain_mp-10688_1x1x1_-0.02.vasp	-8.32153	-8.31794	0.00359514
VASP_strain_mp-865615_1x1x1_-0.02.vasp	-7.15274	-7.23767	0.0849291	VASP_strain_mp-865615_1x1x1_-0.02.vasp	-7.15274	-7.14155	0.0111923
VASP_strain_mp-3432_1x1x1_-0.05.vasp	-6.14991	-6.31466	0.164749	VASP_strain_mp-3432_1x1x1_-0.05.vasp	-6.14991	-6.25178	0.101865
VASP_strain_mp-867798_1x1x1_0.04.vasp	-5.6108	-5.53746	0.0733374	VASP_strain_mp-867798_1x1x1_0.04.vasp	-5.6108	-5.54353	0.0672676
VASP_strain_mp-1097096_1x1x1_-0.03.vasp	-4.11095	-4.11778	0.00683014	VASP_strain_mp-1097096_1x1x1_-0.03.vasp	-4.11095	-4.08472	0.0262312
VASP_strain_mp-1223918_1x1x1_0.03.vasp	-3.97199	-3.95327	0.0187187	VASP_strain_mp-1223918_1x1x1_0.03.vasp	-3.97199	-3.93154	0.0404501
VASP_strain_mp-865935_1x1x1_0.03.vasp	-2.62849	-2.60617	0.0223133	VASP_strain_mp-865935_1x1x1_0.03.vasp	-2.62849	-2.5855	0.0429841
VASP_strain_mp-672340_1x1x1_-0.02.vasp	-4.20023	-4.26672	0.0664896	VASP_strain_mp-672340_1x1x1_-0.02.vasp	-4.20023	-4.20332	0.00309079
VASP_strain_mp-1206750_1x1x1_0.03.vasp	-7.9251	-7.94806	0.0229641	VASP_strain_mp-1206750_1x1x1_0.03.vasp	-7.9251	-7.90218	0.0229222
VASP_strain_mp-985301_1x1x1_-0.04.vasp	-4.35088	-4.39426	0.0433786	VASP_strain_mp-985301_1x1x1_-0.04.vasp	-4.35088	-4.3654	0.0145224
VASP_strain_mp-1096437_1x1x1_-0.02.vasp	-2.41598	-2.1004	0.315579	VASP_strain_mp-1096437_1x1x1_-0.02.vasp	-2.41598	-2.1597	0.256272
VASP_strain_mp-1147530_1x1x1_0.02.vasp	-2.4403	-2.42673	0.01357	VASP_strain_mp-1147530_1x1x1_0.02.vasp	-2.4403	-2.49052	0.0502217
VASP_strain_mp-978501_1x1x1_0.03.vasp	-4.33954	-4.33634	0.00320648	VASP_strain_mp-978501_1x1x1_0.03.vasp	-4.33954	-4.36617	0.0266263
VASP_strain_mp-1183256_1x1x1_0.03.vasp	-3.26181	-3.26642	0.00460563	VASP_strain_mp-1183256_1x1x1_0.03.vasp	-3.26181	-3.20338	0.0584357
VASP_strain_mp-865114_1x1x1_-0.01.vasp	-2.80767	-2.8238	0.016133	VASP_strain_mp-865114_1x1x1_-0.01.vasp	-2.80767	-2.79906	0.0086048
VASP_strain_mp-862956_1x1x1_-0.05.vasp	-4.41494	-4.50346	0.0885109	VASP_strain_mp-862956_1x1x1_-0.05.vasp	-4.41494	-4.53016	0.115211
VASP_strain_mp-862816_1x1x1_0.03.vasp	-6.18821	-6.19118	0.00296899	VASP_strain_mp-862816_1x1x1_0.03.vasp	-6.18821	-6.17521	0.0130017
VASP_strain_mp-7834_1x1x1_-0.03.vasp	-7.07858	-7.10526	0.0266752	VASP_strain_mp-7834_1x1x1_-0.03.vasp	-7.07858	-7.14112	0.0625383
VASP_strain_mp-1094725_1x1x1_-0.04.vasp	-3.25407	-3.35659	0.102521	VASP_strain_mp-1094725_1x1x1_-0.04.vasp	-3.25407	-3.33376	0.0796906
VASP_strain_mp-684664_1x1x1_-0.04.vasp	-3.47753	-3.57021	0.0926799	VASP_strain_mp-684664_1x1x1_-0.04.vasp	-3.47753	-3.56061	0.0830812
VASP_strain_mp-972183_1x1x1_-0.03.vasp	-6.17926	-6.2862	0.106943	VASP_strain_mp-972183_1x1x1_-0.03.vasp	-6.17926	-6.25668	0.0774236
VASP_strain_mp-1221643_1x1x1_-0.04.vasp	-5.06122	-5.0701	0.00888165	VASP_strain_mp-1221643_1x1x1_-0.04.vasp	-5.06122	-5.0318	0.0294173
VASP_strain_mp-982780_1x1x1_0.01.vasp	-0.955924	-0.897162	0.0587617	VASP_strain_mp-982780_1x1x1_0.01.vasp	-0.955924	-0.936273	0.0196512
VASP_strain_mp-1218268_1x1x1_-0.03.vasp	-3.92991	-3.99557	0.0656553	VASP_strain_mp-1218268_1x1x1_-0.03.vasp	-3.92991	-3.93701	0.00710333
VASP_strain_mp-1002181_1x1x1_0.01.vasp	-9.28068	-9.26026	0.020423	VASP_strain_mp-1002181_1x1x1_0.01.vasp	-9.28068	-9.17644	0.104237
VASP_strain_mp-19856_1x1x1_0.01.vasp	-5.53262	-5.49552	0.0371001	VASP_strain_mp-19856_1x1x1_0.01.vasp	-5.53262	-5.48183	0.0507912
VASP_strain_mp-1187771_1x1x1_0.01.vasp	-6.43915	-6.40327	0.0358794	VASP_strain_mp-1187771_1x1x1_0.01.vasp	-6.43915	-6.40439	0.0347625
VASP_strain_mp-862610_1x1x1_-0.01.vasp	-8.06886	-8.1068	0.0379439	VASP_strain_mp-862610_1x1x1_-0.01.vasp	-8.06886	-8.024	0.0448581
VASP_strain_mp-1747_1x1x1_-0.01.vasp	-2.77806	-2.69506	0.0830022	VASP_strain_mp-1747_1x1x1_-0.01.vasp	-2.77806	-2.71481	0.0632441
VASP_strain_mp-1183039_1x1x1_0.05.vasp	-10.6428	-10.493	0.149833	VASP_strain_mp-1183039_1x1x1_0.05.vasp	-10.6428	-10.4376	0.20515
VASP_strain_mp-1971_1x1x1_-0.05.vasp	-4.38261	-4.45529	0.0726813	VASP_strain_mp-1971_1x1x1_-0.05.vasp	-4.38261	-4.44686	0.0642463
VASP_strain_mp-864670_1x1x1_-0.01.vasp	-11.2924	-11.3145	0.0221834	VASP_strain_mp-864670_1x1x1_-0.01.vasp	-11.2924	-11.3405	0.0481827
VASP_strain_mp-604914_1x1x1_0.02.vasp	-6.8079	-6.83282	0.0249172	VASP_strain_mp-604914_1x1x1_0.02.vasp	-6.8079	-6.8321	0.0241986
VASP_strain_mp-1100411_1x1x1_-0.03.vasp	-2.57833	-2.55293	0.0253946	VASP_strain_mp-1100411_1x1x1_-0.03.vasp	-2.57833	-2.61038	0.0320539
VASP_strain_mp-1097596_1x1x1_0.05.vasp	-3.36173	-3.38376	0.0220375	VASP_strain_mp-1097596_1x1x1_0.05.vasp	-3.36173	-3.41283	0.0511032
VASP_strain_mp-1066856_1x1x1_-0.01.vasp	-3.95615	-3.95461	0.00154219	VASP_strain_mp-1066856_1x1x1_-0.01.vasp	-3.95615	-3.89961	0.0565376
VASP_strain_mp-1186658_1x1x1_0.02.vasp	-6.69454	-6.72364	0.029099	VASP_strain_mp-1186658_1x1x1_0.02.vasp	-6.69454	-6.69283	0.00170795
VASP_strain_mp-1096683_1x1x1_-0.04.vasp	-2.25934	-2.31077	0.0514285	VASP_strain_mp-1096683_1x1x1_-0.04.vasp	-2.25934	-2.34179	0.0824444
VASP_strain_mp-865875_1x1x1_0.01.vasp	-2.26462	-2.26404	0.000582184	VASP_strain_mp-865875_1x1x1_0.01.vasp	-2.26462	-2.27453	0.00990201
VASP_strain_mp-865593_1x1x1_0.02.vasp	-5.82618	-5.80816	0.0180195	VASP_strain_mp-865593_1x1x1_0.02.vasp	-5.82618	-5.79139	0.0347854
VASP_strain_mp-1223014_1x1x1_-0.04.vasp	-6.2956	-6.37477	0.0791721	VASP_strain_mp-1223014_1x1x1_-0.04.vasp	-6.2956	-6.42954	0.133939
VASP_strain_mp-973464_1x1x1_-0.03.vasp	-4.54995	-4.58573	0.0357875	VASP_strain_mp-973464_1x1x1_-0.03.vasp	-4.54995	-4.59203	0.0420805
VASP_strain_mp-972542_1x1x1_0.01.vasp	-3.89816	-3.90244	0.00427844	VASP_strain_mp-972542_1x1x1_0.01.vasp	-3.89816	-3.88657	0.0115936
VASP_strain_mp-1226725_1x1x1_0.01.vasp	-3.5919	-3.605	0.0130958	VASP_strain_mp-1226725_1x1x1_0.01.vasp	-3.5919	-3.63741	0.0455126
VASP_strain_mp-1181940_1x1x1_-0.04.vasp	-2.51299	-2.69528	0.182291	VASP_strain_mp-1181940_1x1x1_-0.04.vasp	-2.51299	-2.61809	0.105104
VASP_strain_mp-1256_1x1x1_-0.05.vasp	-4.06206	-4.17159	0.109535	VASP_strain_mp-1256_1x1x1_-0.05.vasp	-4.06206	-4.20714	0.145081
VASP_strain_mp-974387_1x1x1_0.03.vasp	-3.45403	-3.44589	0.00813535	VASP_strain_mp-974387_1x1x1_0.03.vasp	-3.45403	-3.41264	0.0413877
VASP_strain_mp-1097618_1x1x1_0.01.vasp	-6.97665	-6.97832	0.00167508	VASP_strain_mp-1097618_1x1x1_0.01.vasp	-6.97665	-6.94287	0.0337772
VASP_strain_mp-1094734_1x1x1_0.05.vasp	-1.65213	-1.61528	0.0368462	VASP_strain_mp-1094734_1x1x1_0.05.vasp	-1.65213	-1.58373	0.0683957
VASP_strain_mp-999440_1x1x1_-0.02.vasp	-9.3069	-9.45072	0.143814	VASP_strain_mp-999440_1x1x1_-0.02.vasp	-9.3069	-9.39328	0.0863751
VASP_strain_mp-861662_1x1x1_0.05.vasp	-6.7659	-6.73533	0.0305638	VASP_strain_mp-861662_1x1x1_0.05.vasp	-6.7659	-6.64538	0.120513
VASP_strain_mp-1184393_1x1x1_-0.01.vasp	-7.32678	-7.34224	0.0154623	VASP_strain_mp-1184393_1x1x1_-0.01.vasp	-7.32678	-7.3442	0.0174228
VASP_strain_mp-1095852_1x1x1_-0.02.vasp	-3.21695	-3.27752	0.0605687	VASP_strain_mp-1095852_1x1x1_-0.02.vasp	-3.21695	-3.31251	0.0955549
VASP_strain_mp-865094_1x1x1_-0.01.vasp	-10.5976	-10.5991	0.00156698	VASP_strain_mp-865094_1x1x1_-0.01.vasp	-10.5976	-10.6224	0.0248392
VASP_strain_mp-515_1x1x1_0.03.vasp	-3.63443	-3.62449	0.00993174	VASP_strain_mp-515_1x1x1_0.03.vasp	-3.63443	-3.5854	0.0490231
VASP_strain_mp-7088_1x1x1_-0.01.vasp	-11.5549	-11.5597	0.00484663	VASP_strain_mp-7088_1x1x1_-0.01.vasp	-11.5549	-11.4761	0.0787875
VASP_strain_mp-1097224_1x1x1_-0.02.vasp	-0.997037	-1.03277	0.0357279	VASP_strain_mp-1097224_1x1x1_-0.02.vasp	-0.997037	-1.08065	0.0836132
VASP_strain_mp-961705_1x1x1_0.03.vasp	-5.91018	-5.85697	0.0532118	VASP_strain_mp-961705_1x1x1_0.03.vasp	-5.91018	-5.8559	0.0542856
VASP_strain_mp-999448_1x1x1_0.03.vasp	-5.40456	-5.37106	0.0334922	VASP_strain_mp-999448_1x1x1_0.03.vasp	-5.40456	-5.36577	0.0387808
VASP_strain_mp-1184063_1x1x1_0.05.vasp	-6.49505	-6.39975	0.0953019	VASP_strain_mp-1184063_1x1x1_0.05.vasp	-6.49505	-6.397	0.0980519
VASP_strain_mp-976420_1x1x1_-0.03.vasp	-4.65132	-4.67714	0.0258157	VASP_strain_mp-976420_1x1x1_-0.03.vasp	-4.65132	-4.64451	0.00680653
VASP_strain_mp-634755_1x1x1_-0.04.vasp	-6.62301	-6.4983	0.124703	VASP_strain_mp-634755_1x1x1_-0.04.vasp	-6.62301	-6.64959	0.0265806
VASP_strain_mp-863703_1x1x1_0.01.vasp	-4.11808	-4.07354	0.0445383	VASP_strain_mp-863703_1x1x1_0.01.vasp	-4.11808	-4.12895	0.0108734
VASP_strain_mp-1096095_1x1x1_0.03.vasp	-4.55123	-4.6309	0.0796732	VASP_strain_mp-1096095_1x1x1_0.03.vasp	-4.55123	-4.54338	0.00784604
VASP_strain_mp-862755_1x1x1_0.02.vasp	-2.05601	-2.05612	0.000108827	VASP_strain_mp-862755_1x1x1_0.02.vasp	-2.05601	-2.03214	0.0238705
VASP_strain_mp-866157_1x1x1_0.03.vasp	-7.12272	-7.0475	0.0752245	VASP_strain_mp-866157_1x1x1_0.03.vasp	-7.12272	-7.03218	0.0905399
VASP_strain_mp-2093_1x1x1_-0.03.vasp	-4.64748	-4.69469	0.0472139	VASP_strain_mp-2093_1x1x1_-0.03.vasp	-4.64748	-4.67816	0.0306801
VASP_strain_mp-1097154_1x1x1_0.01.vasp	-2.47169	-2.45486	0.0168273	VASP_strain_mp-1097154_1x1x1_0.01.vasp	-2.47169	-2.49527	0.0235793
VASP_strain_mp-867372_1x1x1_0.01.vasp	-3.57432	-3.54844	0.0258726	VASP_strain_mp-867372_1x1x1_0.01.vasp	-3.57432	-3.53522	0.0391012
VASP_strain_mp-1183842_1x1x1_-0.05.vasp	-3.14554	-3.23772	0.0921783	VASP_strain_mp-1183842_1x1x1_-0.05.vasp	-3.14554	-3.22143	0.0758915
VASP_strain_mp-817_1x1x1_0.05.vasp	-2.95783	-2.95046	0.00736754	VASP_strain_mp-817_1x1x1_0.05.vasp	-2.95783	-2.91408	0.0437529
VASP_strain_mp-1097566_1x1x1_-0.01.vasp	-2.14182	-2.14927	0.00745059	VASP_strain_mp-1097566_1x1x1_-0.01.vasp	-2.14182	-2.13527	0.0065436
VASP_strain_mp-1185770_1x1x1_-0.03.vasp	-4.26465	-4.25964	0.00501449	VASP_strain_mp-1185770_1x1x1_-0.03.vasp	-4.26465	-4.28482	0.0201723
VASP_strain_mp-1224169_1x1x1_-0.05.vasp	-9.74985	-9.94122	0.191367	VASP_strain_mp-1224169_1x1x1_-0.05.vasp	-9.74985	-9.9161	0.166244
VASP_strain_mp-1228803_1x1x1_-0.05.vasp	-4.96328	-5.09327	0.129995	VASP_strain_mp-1228803_1x1x1_-0.05.vasp	-4.96328	-5.06802	0.104745
VASP_strain_mp-1097534_1x1x1_-0.05.vasp	-5.17781	-5.3245	0.146685	VASP_strain_mp-1097534_1x1x1_-0.05.vasp	-5.17781	-5.31861	0.140794
VASP_strain_mp-1001826_1x1x1_0.05.vasp	-9.49941	-9.37747	0.121942	VASP_strain_mp-1001826_1x1x1_0.05.vasp	-9.49941	-9.3631	0.136308
VASP_strain_mp-1093669_1x1x1_-0.03.vasp	-5.15613	-5.18072	0.0245941	VASP_strain_mp-1093669_1x1x1_-0.03.vasp	-5.15613	-5.11388	0.0422466
VASP_strain_mp-1183131_1x1x1_0.03.vasp	-3.61061	-3.58954	0.021066	VASP_strain_mp-1183131_1x1x1_0.03.vasp	-3.61061	-3.57706	0.0335454
VASP_strain_mp-1222669_1x1x1_0.04.vasp	-3.13625	-3.07176	0.0644931	VASP_strain_mp-1222669_1x1x1_0.04.vasp	-3.13625	-3.09612	0.0401302
VASP_strain_mp-1220038_1x1x1_0.04.vasp	-7.29383	-7.1863	0.107533	VASP_strain_mp-1220038_1x1x1_0.04.vasp	-7.29383	-7.14126	0.152578
VASP_strain_mp-1184631_1x1x1_0.04.vasp	-5.5883	-5.51547	0.0728301	VASP_strain_mp-1184631_1x1x1_0.04.vasp	-5.5883	-5.4888	0.0995036
VASP_strain_mp-1101661_1x1x1_0.01.vasp	-5.76147	-5.73183	0.0296378	VASP_strain_mp-1101661_1x1x1_0.01.vasp	-5.76147	-5.67395	0.0875266
VASP_strain_mp-861874_1x1x1_0.05.vasp	-2.13328	-2.12237	0.0109083	VASP_strain_mp-861874_1x1x1_0.05.vasp	-2.13328	-2.1066	0.0266833
VASP_strain_mp-979712_1x1x1_0.02.vasp	-3.65788	-3.63602	0.0218587	VASP_strain_mp-979712_1x1x1_0.02.vasp	-3.65788	-3.60558	0.0523042
VASP_strain_mp-1096461_1x1x1_-0.04.vasp	-3.08133	-3.14014	0.05881	VASP_strain_mp-1096461_1x1x1_-0.04.vasp	-3.08133	-3.19259	0.111253
VASP_strain_mp-1093899_1x1x1_0.01.vasp	-3.85008	-3.8862	0.0361234	VASP_strain_mp-1093899_1x1x1_0.01.vasp	-3.85008	-3.83623	0.0138428
VASP_strain_mp-1222309_1x1x1_-0.02.vasp	-4.9762	-5.01264	0.0364423	VASP_strain_mp-1222309_1x1x1_-0.02.vasp	-4.9762	-5.00418	0.0279844
VASP_strain_mp-865863_1x1x1_-0.03.vasp	-3.15966	-3.22687	0.067213	VASP_strain_mp-865863_1x1x1_-0.03.vasp	-3.15966	-3.22586	0.0661998
VASP_strain_mp-862917_1x1x1_-0.03.vasp	-4.12155	-4.15377	0.0322212	VASP_strain_mp-862917_1x1x1_-0.03.vasp	-4.12155	-4.1696	0.0480524
VASP_strain_mp-22863_1x1x1_-0.01.vasp	-2.76976	-2.61857	0.151196	VASP_strain_mp-22863_1x1x1_-0.01.vasp	-2.76976	-2.75713	0.01263
VASP_strain_mp-1008634_1x1x1_0.01.vasp	-3.20173	-3.18673	0.0150014	VASP_strain_mp-1008634_1x1x1_0.01.vasp	-3.20173	-3.20086	0.000868119
VASP_strain_mp-1094230_1x1x1_-0.01.vasp	-3.23706	-3.26798	0.0309207	VASP_strain_mp-1094230_1x1x1_-0.01.vasp	-3.23706	-3.27369	0.0366212
VASP_strain_mp-754326_1x1x1_-0.01.vasp	-4.18523	-4.20274	0.0175063	VASP_strain_mp-754326_1x1x1_-0.01.vasp	-4.18523	-4.20603	0.0207987
VASP_strain_mp-1186004_1x1x1_-0.02.vasp	-6.02711	-6.07766	0.0505573	VASP_strain_mp-1186004_1x1x1_-0.02.vasp	-6.02711	-6.04315	0.0160436
VASP_strain_mp-1219254_1x1x1_-0.03.vasp	-5.45217	-5.57945	0.127279	VASP_strain_mp-1219254_1x1x1_-0.03.vasp	-5.45217	-5.53323	0.0810608
VASP_strain_mp-1902_1x1x1_-0.02.vasp	-6.46807	-6.39742	0.0706438	VASP_strain_mp-1902_1x1x1_-0.02.vasp	-6.46807	-6.49429	0.026225
VASP_strain_mp-1187303_1x1x1_-0.04.vasp	-4.6735	-4.72506	0.0515606	VASP_strain_mp-1187303_1x1x1_-0.04.vasp	-4.6735	-4.74543	0.0719282
VASP_strain_mp-2502_1x1x1_-0.05.vasp	-2.91408	-2.99032	0.0762424	VASP_strain_mp-2502_1x1x1_-0.05.vasp	-2.91408	-3.01191	0.0978349
VASP_strain_mp-1185212_1x1x1_0.05.vasp	-2.35249	-2.27032	0.0821722	VASP_strain_mp-1185212_1x1x1_0.05.vasp	-2.35249	-2.22809	0.124397
VASP_strain_mp-1183581_1x1x1_0.02.vasp	-2.21182	-2.20058	0.0112412	VASP_strain_mp-1183581_1x1x1_0.02.vasp	-2.21182	-2.19286	0.0189679
VASP_strain_mp-1186593_1x1x1_0.04.vasp	-3.99933	-4.02991	0.0305818	VASP_strain_mp-1186593_1x1x1_0.04.vasp	-3.99933	-3.91651	0.0828157
VASP_strain_mp-569446_1x1x1_0.03.vasp	-4.42823	-4.30799	0.120247	VASP_strain_mp-569446_1x1x1_0.03.vasp	-4.42823	-4.34973	0.0785028
VASP_strain_mp-1186681_1x1x1_0.01.vasp	-7.89476	-7.86513	0.0296325	VASP_strain_mp-1186681_1x1x1_0.01.vasp	-7.89476	-7.86921	0.0255461
VASP_strain_mp-864807_1x1x1_0.02.vasp	-5.92943	-5.84976	0.0796704	VASP_strain_mp-864807_1x1x1_0.02.vasp	-5.92943	-5.88141	0.0480175
VASP_strain_mp-972993_1x1x1_0.03.vasp	-3.93914	-3.90361	0.0355301	VASP_strain_mp-972993_1x1x1_0.03.vasp	-3.93914	-3.88524	0.0538943
VASP_strain_mp-29803_1x1x1_-0.01.vasp	-4.37342	-4.42084	0.0474156	VASP_strain_mp-29803_1x1x1_-0.01.vasp	-4.37342	-4.36494	0.00848469
VASP_strain_mp-1221397_1x1x1_-0.01.vasp	-8.27778	-8.31475	0.0369619	VASP_strain_mp-1221397_1x1x1_-0.01.vasp	-8.27778	-8.33327	0.0554882
VASP_strain_mp-24155_1x1x1_0.02.vasp	-5.66053	-5.65468	0.00585579	VASP_strain_mp-24155_1x1x1_0.02.vasp	-5.66053	-5.64208	0.0184505
VASP_strain_mp-1097051_1x1x1_0.03.vasp	-5.99865	-6.04696	0.0483158	VASP_strain_mp-1097051_1x1x1_0.03.vasp	-5.99865	-5.98757	0.0110774
VASP_strain_mp-1207075_1x1x1_-0.02.vasp	-3.66551	-3.69523	0.0297186	VASP_strain_mp-1207075_1x1x1_-0.02.vasp	-3.66551	-3.71943	0.0539209
VASP_strain_mp-30592_1x1x1_-0.03.vasp	-4.75648	-4.84796	0.0914763	VASP_strain_mp-30592_1x1x1_-0.03.vasp	-4.75648	-4.8298	0.0733157
VASP_strain_mp-11279_1x1x1_-0.05.vasp	-5.90407	-6.16938	0.265307	VASP_strain_mp-11279_1x1x1_-0.05.vasp	-5.90407	-6.19723	0.29316
VASP_strain_mvc-14925_1x1x1_0.03.vasp	-7.13115	-6.88992	0.241234	VASP_strain_mvc-14925_1x1x1_0.03.vasp	-7.13115	-6.86422	0.26693
VASP_strain_mp-1207095_1x1x1_-0.03.vasp	-4.88404	-4.91426	0.0302229	VASP_strain_mp-1207095_1x1x1_-0.03.vasp	-4.88404	-4.90492	0.0208836
VASP_strain_mp-2475_1x1x1_-0.03.vasp	-3.96621	-4.00904	0.0428315	VASP_strain_mp-2475_1x1x1_-0.03.vasp	-3.96621	-3.97908	0.012875
VASP_strain_mp-1184091_1x1x1_0.04.vasp	-4.56045	-4.50449	0.0559637	VASP_strain_mp-1184091_1x1x1_0.04.vasp	-4.56045	-4.49261	0.0678384
VASP_strain_mp-1226287_1x1x1_-0.05.vasp	-7.10978	-7.36627	0.256497	VASP_strain_mp-1226287_1x1x1_-0.05.vasp	-7.10978	-7.27997	0.170199
VASP_strain_mp-1185241_1x1x1_0.04.vasp	-4.47369	-4.43049	0.0432043	VASP_strain_mp-1185241_1x1x1_0.04.vasp	-4.47369	-4.36605	0.107639
VASP_strain_mp-961684_1x1x1_-0.02.vasp	-3.80875	-3.8134	0.00465064	VASP_strain_mp-961684_1x1x1_-0.02.vasp	-3.80875	-3.79707	0.0116779
VASP_strain_mp-999335_1x1x1_-0.02.vasp	-6.64347	-6.63652	0.00694884	VASP_strain_mp-999335_1x1x1_-0.02.vasp	-6.64347	-6.75777	0.114302
VASP_strain_mp-1097081_1x1x1_-0.01.vasp	-3.73448	-3.73008	0.0043975	VASP_strain_mp-1097081_1x1x1_-0.01.vasp	-3.73448	-3.75217	0.0176913
VASP_strain_mp-865958_1x1x1_-0.04.vasp	-3.14409	-3.21477	0.0706765	VASP_strain_mp-865958_1x1x1_-0.04.vasp	-3.14409	-3.22755	0.0834523
VASP_strain_mp-1227294_1x1x1_-0.04.vasp	-6.31272	-6.33221	0.0194904	VASP_strain_mp-1227294_1x1x1_-0.04.vasp	-6.31272	-6.29096	0.0217673
VASP_strain_mp-11299_1x1x1_-0.05.vasp	-0.548842	-0.560857	0.0120148	VASP_strain_mp-11299_1x1x1_-0.05.vasp	-0.548842	-0.604012	0.0551698
VASP_strain_mp-13914_1x1x1_-0.01.vasp	-5.33975	-5.33805	0.00169845	VASP_strain_mp-13914_1x1x1_-0.01.vasp	-5.33975	-5.29323	0.046516
VASP_strain_mp-961662_1x1x1_-0.05.vasp	-6.1482	-6.24933	0.101132	VASP_strain_mp-961662_1x1x1_-0.05.vasp	-6.1482	-6.20731	0.0591115
VASP_strain_mp-1186236_1x1x1_0.02.vasp	-3.50977	-3.53075	0.0209779	VASP_strain_mp-1186236_1x1x1_0.02.vasp	-3.50977	-3.46335	0.0464143
VASP_strain_mp-1008860_1x1x1_0.04.vasp	-6.84031	-7.07418	0.233867	VASP_strain_mp-1008860_1x1x1_0.04.vasp	-6.84031	-6.85535	0.0150317
VASP_strain_mp-979417_1x1x1_-0.05.vasp	-3.43882	-3.51086	0.0720312	VASP_strain_mp-979417_1x1x1_-0.05.vasp	-3.43882	-3.51371	0.0748805
VASP_strain_mp-1216719_1x1x1_0.04.vasp	-7.90657	-7.81846	0.0881025	VASP_strain_mp-1216719_1x1x1_0.04.vasp	-7.90657	-7.78144	0.125131
VASP_strain_mp-1219_1x1x1_0.03.vasp	-3.02823	-3.0138	0.0144291	VASP_strain_mp-1219_1x1x1_0.03.vasp	-3.02823	-2.90922	0.119007
VASP_strain_mp-972649_1x1x1_-0.03.vasp	-7.11019	-7.18401	0.0738145	VASP_strain_mp-972649_1x1x1_-0.03.vasp	-7.11019	-7.18197	0.0717708
VASP_strain_mp-1184573_1x1x1_0.01.vasp	-10.5843	-10.5469	0.0373608	VASP_strain_mp-1184573_1x1x1_0.01.vasp	-10.5843	-10.5535	0.0307668
VASP_strain_mp-1185323_1x1x1_-0.05.vasp	-5.08216	-5.22396	0.1418	VASP_strain_mp-1185323_1x1x1_-0.05.vasp	-5.08216	-5.319	0.23684
VASP_strain_mp-1094964_1x1x1_-0.05.vasp	-5.51033	-5.65343	0.1431	VASP_strain_mp-1094964_1x1x1_-0.05.vasp	-5.51033	-5.62482	0.114494
VASP_strain_mp-865044_1x1x1_-0.01.vasp	-5.68101	-5.66981	0.0112078	VASP_strain_mp-865044_1x1x1_-0.01.vasp	-5.68101	-5.65342	0.0275967
VASP_strain_mp-1226733_1x1x1_0.05.vasp	-2.37624	-2.33431	0.0419287	VASP_strain_mp-1226733_1x1x1_0.05.vasp	-2.37624	-2.3463	0.0299402
VASP_strain_mp-1095934_1x1x1_-0.04.vasp	-1.09825	-1.13609	0.0378365	VASP_strain_mp-1095934_1x1x1_-0.04.vasp	-1.09825	-1.12857	0.0303185
VASP_strain_mp-1225673_1x1x1_-0.03.vasp	-4.43791	-4.45097	0.0130611	VASP_strain_mp-1225673_1x1x1_-0.03.vasp	-4.43791	-4.43986	0.00194459
VASP_strain_mp-1094982_1x1x1_0.03.vasp	-1.73174	-1.7256	0.0061421	VASP_strain_mp-1094982_1x1x1_0.03.vasp	-1.73174	-1.70825	0.0234971
VASP_strain_mp-1221704_1x1x1_-0.02.vasp	-7.02865	-7.17247	0.143819	VASP_strain_mp-1221704_1x1x1_-0.02.vasp	-7.02865	-6.99389	0.0347604
VASP_strain_mp-961697_1x1x1_-0.02.vasp	-5.35854	-5.41723	0.0586876	VASP_strain_mp-961697_1x1x1_-0.02.vasp	-5.35854	-5.38549	0.0269421
VASP_strain_mp-10194_1x1x1_0.05.vasp	-6.05736	-5.96704	0.0903274	VASP_strain_mp-10194_1x1x1_0.05.vasp	-6.05736	-5.94448	0.112886
VASP_strain_mp-569440_1x1x1_-0.01.vasp	-3.47474	-3.47659	0.00185226	VASP_strain_mp-569440_1x1x1_-0.01.vasp	-3.47474	-3.47486	0.000122275
VASP_strain_mp-974310_1x1x1_0.02.vasp	-2.94035	-2.94661	0.0062682	VASP_strain_mp-974310_1x1x1_0.02.vasp	-2.94035	-2.94344	0.00308967
VASP_strain_mp-1185366_1x1x1_0.03.vasp	-2.02063	-2.01496	0.00567173	VASP_strain_mp-1185366_1x1x1_0.03.vasp	-2.02063	-2.01981	0.000821799
VASP_strain_mp-30405_1x1x1_-0.02.vasp	-3.25244	-3.24007	0.0123738	VASP_strain_mp-30405_1x1x1_-0.02.vasp	-3.25244	-3.22697	0.0254697
VASP_strain_mp-961666_1x1x1_0.03.vasp	-7.51315	-7.74415	0.231006	VASP_strain_mp-961666_1x1x1_0.03.vasp	-7.51315	-7.56893	0.0557808
VASP_strain_mp-866111_1x1x1_-0.03.vasp	-7.39441	-7.47901	0.0846025	VASP_strain_mp-866111_1x1x1_-0.03.vasp	-7.39441	-7.42428	0.0298692
VASP_strain_mp-2469_1x1x1_0.04.vasp	-3.06001	-3.01847	0.0415346	VASP_strain_mp-2469_1x1x1_0.04.vasp	-3.06001	-2.9951	0.0649055
VASP_strain_mp-1184794_1x1x1_0.05.vasp	-7.61416	-7.51072	0.103438	VASP_strain_mp-1184794_1x1x1_0.05.vasp	-7.61416	-7.49517	0.118994
VASP_strain_mp-999461_1x1x1_-0.03.vasp	-4.9329	-4.99335	0.0604562	VASP_strain_mp-999461_1x1x1_-0.03.vasp	-4.9329	-4.96836	0.0354584
VASP_strain_mp-631452_1x1x1_-0.01.vasp	-9.83498	-9.8863	0.051317	VASP_strain_mp-631452_1x1x1_-0.01.vasp	-9.83498	-9.85618	0.0212013
VASP_strain_mp-1096133_1x1x1_0.04.vasp	-4.39955	-4.36004	0.0395177	VASP_strain_mp-1096133_1x1x1_0.04.vasp	-4.39955	-4.30081	0.0987407
VASP_strain_mp-1184135_1x1x1_-0.04.vasp	-2.81513	-2.886	0.0708738	VASP_strain_mp-1184135_1x1x1_-0.04.vasp	-2.81513	-2.90265	0.0875155
VASP_strain_mp-20392_1x1x1_-0.02.vasp	-7.21941	-7.24999	0.0305812	VASP_strain_mp-20392_1x1x1_-0.02.vasp	-7.21941	-7.21494	0.00447523
VASP_strain_mp-12605_1x1x1_0.05.vasp	-7.90313	-7.71241	0.190722	VASP_strain_mp-12605_1x1x1_0.05.vasp	-7.90313	-7.74842	0.154709
VASP_strain_mp-978949_1x1x1_-0.03.vasp	-4.5969	-4.64698	0.0500839	VASP_strain_mp-978949_1x1x1_-0.03.vasp	-4.5969	-4.61521	0.0183094
VASP_strain_mp-1023924_1x1x1_0.01.vasp	-7.2764	-7.21653	0.059865	VASP_strain_mp-1023924_1x1x1_0.01.vasp	-7.2764	-7.14469	0.131704
VASP_strain_mp-863673_1x1x1_0.04.vasp	-4.98513	-4.91829	0.0668441	VASP_strain_mp-863673_1x1x1_0.04.vasp	-4.98513	-4.93935	0.0457812
VASP_strain_mp-5967_1x1x1_0.01.vasp	-6.98033	-6.8412	0.13913	VASP_strain_mp-5967_1x1x1_0.01.vasp	-6.98033	-6.78574	0.194593
VASP_strain_mp-165_1x1x1_0.03.vasp	-5.40243	-5.38196	0.0204674	VASP_strain_mp-165_1x1x1_0.03.vasp	-5.40243	-5.34973	0.0526979
VASP_strain_mp-20071_1x1x1_0.05.vasp	-10.2141	-10.1731	0.0410096	VASP_strain_mp-20071_1x1x1_0.05.vasp	-10.2141	-10.0991	0.115056
VASP_strain_mp-1184769_1x1x1_-0.05.vasp	-7.51059	-7.69063	0.180038	VASP_strain_mp-1184769_1x1x1_-0.05.vasp	-7.51059	-7.64923	0.138643
VASP_strain_mp-1215247_1x1x1_-0.05.vasp	-10.5358	-10.7245	0.188738	VASP_strain_mp-1215247_1x1x1_-0.05.vasp	-10.5358	-10.6395	0.103758
VASP_strain_mp-1227206_1x1x1_-0.02.vasp	-4.4041	-4.39825	0.00585646	VASP_strain_mp-1227206_1x1x1_-0.02.vasp	-4.4041	-4.44305	0.0389439
VASP_strain_mp-8937_1x1x1_0.05.vasp	-7.1271	-7.06088	0.0662165	VASP_strain_mp-8937_1x1x1_0.05.vasp	-7.1271	-7.03891	0.0881856
VASP_strain_mp-36526_1x1x1_-0.02.vasp	-7.39017	-7.45001	0.0598361	VASP_strain_mp-36526_1x1x1_-0.02.vasp	-7.39017	-7.51032	0.12015
VASP_strain_mp-30779_1x1x1_-0.02.vasp	-2.39927	-2.39726	0.00201368	VASP_strain_mp-30779_1x1x1_-0.02.vasp	-2.39927	-2.39579	0.00348906
VASP_strain_mp-867860_1x1x1_-0.04.vasp	-3.64383	-3.7057	0.0618734	VASP_strain_mp-867860_1x1x1_-0.04.vasp	-3.64383	-3.74566	0.101831
VASP_strain_mp-1186751_1x1x1_-0.04.vasp	-3.76547	-3.8457	0.0802285	VASP_strain_mp-1186751_1x1x1_-0.04.vasp	-3.76547	-3.81992	0.0544469
VASP_strain_mp-976151_1x1x1_0.05.vasp	-3.13728	-3.10883	0.0284525	VASP_strain_mp-976151_1x1x1_0.05.vasp	-3.13728	-3.06642	0.0708616
VASP_strain_mp-1187946_1x1x1_0.03.vasp	-2.32834	-2.31022	0.0181141	VASP_strain_mp-1187946_1x1x1_0.03.vasp	-2.32834	-2.35599	0.0276569
VASP_strain_mp-10179_1x1x1_-0.05.vasp	-3.73752	-3.83602	0.0985024	VASP_strain_mp-10179_1x1x1_-0.05.vasp	-3.73752	-3.83959	0.102071
VASP_strain_mp-1095982_1x1x1_-0.02.vasp	-0.721794	-0.723926	0.00213145	VASP_strain_mp-1095982_1x1x1_-0.02.vasp	-0.721794	-0.737505	0.0157106
VASP_strain_mp-1187437_1x1x1_-0.02.vasp	-4.07569	-4.09805	0.0223582	VASP_strain_mp-1187437_1x1x1_-0.02.vasp	-4.07569	-4.0955	0.0198091
VASP_strain_mp-863250_1x1x1_-0.02.vasp	-8.77583	-8.76216	0.0136752	VASP_strain_mp-863250_1x1x1_-0.02.vasp	-8.77583	-8.76474	0.0110889
VASP_strain_mp-429_1x1x1_0.01.vasp	-3.5463	-3.52898	0.0173242	VASP_strain_mp-429_1x1x1_0.01.vasp	-3.5463	-3.4682	0.0781034
VASP_strain_mp-976032_1x1x1_-0.03.vasp	-3.17772	-3.23745	0.0597285	VASP_strain_mp-976032_1x1x1_-0.03.vasp	-3.17772	-3.22735	0.0496305
VASP_strain_mp-1186910_1x1x1_-0.02.vasp	-3.88554	-3.95964	0.0740976	VASP_strain_mp-1186910_1x1x1_-0.02.vasp	-3.88554	-3.91981	0.0342652
VASP_strain_mp-1100784_1x1x1_-0.04.vasp	-8.68071	-8.79755	0.116843	VASP_strain_mp-1100784_1x1x1_-0.04.vasp	-8.68071	-8.88394	0.203227
VASP_strain_mp-999557_1x1x1_-0.05.vasp	-7.72655	-7.75268	0.0261266	VASP_strain_mp-999557_1x1x1_-0.05.vasp	-7.72655	-7.63187	0.0946814
VASP_strain_mp-978564_1x1x1_0.01.vasp	-4.26354	-4.25496	0.00857662	VASP_strain_mp-978564_1x1x1_0.01.vasp	-4.26354	-4.22909	0.0344473
VASP_strain_mp-999144_1x1x1_-0.04.vasp	-7.42596	-7.46871	0.0427457	VASP_strain_mp-999144_1x1x1_-0.04.vasp	-7.42596	-7.46803	0.0420696
VASP_strain_mp-570459_1x1x1_-0.04.vasp	-3.09449	-3.09303	0.00146211	VASP_strain_mp-570459_1x1x1_-0.04.vasp	-3.09449	-3.16193	0.0674332
VASP_strain_mp-24084_1x1x1_0.03.vasp	-2.4132	-2.42358	0.0103816	VASP_strain_mp-24084_1x1x1_0.03.vasp	-2.4132	-2.36034	0.0528602
VASP_strain_mp-862370_1x1x1_0.05.vasp	-7.46372	-7.37836	0.0853545	VASP_strain_mp-862370_1x1x1_0.05.vasp	-7.46372	-7.35828	0.105431
VASP_strain_mp-590_1x1x1_-0.05.vasp	-5.33649	-5.49286	0.15637	VASP_strain_mp-590_1x1x1_-0.05.vasp	-5.33649	-5.42493	0.0884416
VASP_strain_mp-864924_1x1x1_0.04.vasp	-2.10889	-2.08	0.0288856	VASP_strain_mp-864924_1x1x1_0.04.vasp	-2.10889	-2.09063	0.0182511
VASP_strain_mp-631539_1x1x1_-0.05.vasp	-3.31533	-3.51064	0.195312	VASP_strain_mp-631539_1x1x1_-0.05.vasp	-3.31533	-3.61936	0.304036
VASP_strain_mp-1187086_1x1x1_-0.05.vasp	-2.54292	-2.60264	0.0597219	VASP_strain_mp-1187086_1x1x1_-0.05.vasp	-2.54292	-2.55377	0.0108514
VASP_strain_mp-1183761_1x1x1_-0.01.vasp	-4.79064	-4.81504	0.0244007	VASP_strain_mp-1183761_1x1x1_-0.01.vasp	-4.79064	-4.80167	0.011022
VASP_strain_mp-973004_1x1x1_0.02.vasp	-8.50099	-8.43668	0.0643186	VASP_strain_mp-973004_1x1x1_0.02.vasp	-8.50099	-8.37016	0.130837
VASP_strain_mp-1185218_1x1x1_0.04.vasp	-4.43629	-4.3905	0.0457978	VASP_strain_mp-1185218_1x1x1_0.04.vasp	-4.43629	-4.36188	0.0744132
VASP_strain_mp-971712_1x1x1_-0.02.vasp	-3.22991	-3.263	0.0330833	VASP_strain_mp-971712_1x1x1_-0.02.vasp	-3.22991	-3.28562	0.0557102
VASP_strain_mp-867130_1x1x1_0.04.vasp	-3.12396	-3.10604	0.0179111	VASP_strain_mp-867130_1x1x1_0.04.vasp	-3.12396	-3.07383	0.0501249
VASP_strain_mp-1185396_1x1x1_0.05.vasp	-5.40352	-5.34637	0.0571478	VASP_strain_mp-1185396_1x1x1_0.05.vasp	-5.40352	-5.32078	0.0827385
VASP_strain_mp-1058689_1x1x1_0.02.vasp	-3.33418	-3.3038	0.0303735	VASP_strain_mp-1058689_1x1x1_0.02.vasp	-3.33418	-3.29288	0.041299
VASP_strain_mp-984_1x1x1_-0.02.vasp	-8.7874	-8.79557	0.00817319	VASP_strain_mp-984_1x1x1_-0.02.vasp	-8.7874	-8.72352	0.0638799
VASP_strain_mp-1186074_1x1x1_0.03.vasp	-2.30402	-2.26859	0.0354278	VASP_strain_mp-1186074_1x1x1_0.03.vasp	-2.30402	-2.27648	0.0275341
VASP_strain_mp-977392_1x1x1_-0.04.vasp	-3.57046	-3.6189	0.0484337	VASP_strain_mp-977392_1x1x1_-0.04.vasp	-3.57046	-3.63996	0.0694997
VASP_strain_mp-20457_1x1x1_0.02.vasp	-3.96053	-3.76617	0.194365	VASP_strain_mp-20457_1x1x1_0.02.vasp	-3.96053	-3.98853	0.0279956
VASP_strain_mp-865003_1x1x1_-0.04.vasp	-5.96828	-6.09693	0.12865	VASP_strain_mp-865003_1x1x1_-0.04.vasp	-5.96828	-6.07822	0.109943
VASP_strain_mp-1094224_1x1x1_-0.03.vasp	-4.88873	-5.14392	0.255191	VASP_strain_mp-1094224_1x1x1_-0.03.vasp	-4.88873	-5.06547	0.176743
VASP_strain_mp-21391_1x1x1_-0.05.vasp	-3.6461	-3.73857	0.0924712	VASP_strain_mp-21391_1x1x1_-0.05.vasp	-3.6461	-3.76651	0.120411
VASP_strain_mp-984048_1x1x1_-0.03.vasp	-4.7905	-4.8374	0.0469045	VASP_strain_mp-984048_1x1x1_-0.03.vasp	-4.7905	-4.8435	0.0530032
VASP_strain_mp-1095915_1x1x1_0.01.vasp	-1.43012	-1.48993	0.05981	VASP_strain_mp-1095915_1x1x1_0.01.vasp	-1.43012	-1.46825	0.0381297
VASP_strain_mp-715923_1x1x1_-0.03.vasp	-9.06795	-9.11545	0.0474972	VASP_strain_mp-715923_1x1x1_-0.03.vasp	-9.06795	-9.19835	0.130393
VASP_strain_mp-1226212_1x1x1_-0.04.vasp	-5.85817	-5.89014	0.0319673	VASP_strain_mp-1226212_1x1x1_-0.04.vasp	-5.85817	-5.83703	0.0211393
VASP_strain_mp-1184536_1x1x1_0.04.vasp	-4.44535	-4.4465	0.00115892	VASP_strain_mp-1184536_1x1x1_0.04.vasp	-4.44535	-4.43812	0.00722331
VASP_strain_mp-1224549_1x1x1_0.03.vasp	-4.34818	-4.31391	0.0342765	VASP_strain_mp-1224549_1x1x1_0.03.vasp	-4.34818	-4.26864	0.0795404
VASP_strain_mp-1092293_1x1x1_-0.03.vasp	-4.81691	-4.84324	0.0263326	VASP_strain_mp-1092293_1x1x1_-0.03.vasp	-4.81691	-4.85001	0.0331084
VASP_strain_mp-647_1x1x1_-0.02.vasp	-8.01349	-8.2308	0.217309	VASP_strain_mp-647_1x1x1_-0.02.vasp	-8.01349	-8.11751	0.104014
VASP_strain_mp-685055_1x1x1_-0.05.vasp	-5.43918	-5.46169	0.0225066	VASP_strain_mp-685055_1x1x1_-0.05.vasp	-5.43918	-5.4448	0.0056185
VASP_strain_mp-982246_1x1x1_-0.02.vasp	-3.27546	-3.28786	0.0124048	VASP_strain_mp-982246_1x1x1_-0.02.vasp	-3.27546	-3.26493	0.0105289
VASP_strain_mp-1215904_1x1x1_0.04.vasp	-5.45389	-5.43169	0.0221938	VASP_strain_mp-1215904_1x1x1_0.04.vasp	-5.45389	-5.37642	0.0774636
VASP_strain_mp-1096372_1x1x1_-0.03.vasp	-1.92158	-1.91425	0.00732445	VASP_strain_mp-1096372_1x1x1_-0.03.vasp	-1.92158	-1.94036	0.0187847
VASP_strain_mp-1096345_1x1x1_0.05.vasp	-3.48616	-3.51838	0.0322193	VASP_strain_mp-1096345_1x1x1_0.05.vasp	-3.48616	-3.50073	0.0145658
VASP_strain_mp-1183498_1x1x1_0.03.vasp	-2.43363	-2.44798	0.0143553	VASP_strain_mp-1183498_1x1x1_0.03.vasp	-2.43363	-2.40081	0.0328204
VASP_strain_mp-10204_1x1x1_0.03.vasp	-6.58365	-6.60273	0.0190807	VASP_strain_mp-10204_1x1x1_0.03.vasp	-6.58365	-6.53924	0.044416
VASP_strain_mp-862705_1x1x1_0.02.vasp	-6.21308	-6.14509	0.0679914	VASP_strain_mp-862705_1x1x1_0.02.vasp	-6.21308	-6.12614	0.0869422
VASP_strain_mp-976292_1x1x1_0.03.vasp	-2.13873	-2.14372	0.00499335	VASP_strain_mp-976292_1x1x1_0.03.vasp	-2.13873	-2.13522	0.0035113
VASP_strain_mp-1018046_1x1x1_0.02.vasp	-7.16515	-7.11751	0.0476475	VASP_strain_mp-1018046_1x1x1_0.02.vasp	-7.16515	-7.11371	0.051446
VASP_strain_mp-631568_1x1x1_-0.01.vasp	-3.55138	-3.60677	0.0553879	VASP_strain_mp-631568_1x1x1_-0.01.vasp	-3.55138	-3.57053	0.0191514
VASP_strain_mp-51_1x1x1_0.05.vasp	-1.90313	-1.86832	0.0348096	VASP_strain_mp-51_1x1x1_0.05.vasp	-1.90313	-1.86479	0.0383412
VASP_strain_mp-1187590_1x1x1_-0.03.vasp	-4.93131	-4.9545	0.0231896	VASP_strain_mp-1187590_1x1x1_-0.03.vasp	-4.93131	-5.007	0.075686
VASP_strain_mp-30580_1x1x1_0.03.vasp	-3.26034	-3.19971	0.0606302	VASP_strain_mp-30580_1x1x1_0.03.vasp	-3.26034	-3.27324	0.0129013
VASP_strain_mp-867201_1x1x1_0.03.vasp	-1.60171	-1.60103	0.000679551	VASP_strain_mp-867201_1x1x1_0.03.vasp	-1.60171	-1.56743	0.0342783
VASP_strain_mp-975524_1x1x1_0.05.vasp	-3.73501	-3.7101	0.0249092	VASP_strain_mp-975524_1x1x1_0.05.vasp	-3.73501	-3.71066	0.0243574
VASP_strain_mp-31434_1x1x1_-0.03.vasp	-10.166	-10.2181	0.0521309	VASP_strain_mp-31434_1x1x1_-0.03.vasp	-10.166	-10.2077	0.0416813
VASP_strain_mp-1097464_1x1x1_-0.05.vasp	-1.2786	-1.3059	0.0273008	VASP_strain_mp-1097464_1x1x1_-0.05.vasp	-1.2786	-1.33939	0.0607925
VASP_strain_mp-981312_1x1x1_0.01.vasp	-4.18156	-4.11676	0.0648044	VASP_strain_mp-981312_1x1x1_0.01.vasp	-4.18156	-4.10176	0.0798091
VASP_strain_mp-30560_1x1x1_0.01.vasp	-6.31288	-6.66152	0.348638	VASP_strain_mp-30560_1x1x1_0.01.vasp	-6.31288	-6.61904	0.306154
VASP_strain_mp-1183961_1x1x1_-0.04.vasp	-2.15731	-2.13021	0.0270943	VASP_strain_mp-1183961_1x1x1_-0.04.vasp	-2.15731	-2.18436	0.0270513
VASP_strain_mp-1094701_1x1x1_0.02.vasp	-4.08003	-4.07729	0.00273238	VASP_strain_mp-1094701_1x1x1_0.02.vasp	-4.08003	-4.05758	0.0224456
VASP_strain_mp-1217047_1x1x1_0.01.vasp	-4.95761	-4.87689	0.0807181	VASP_strain_mp-1217047_1x1x1_0.01.vasp	-4.95761	-4.84589	0.111714
VASP_strain_mp-1097271_1x1x1_0.02.vasp	-2.23392	-2.22458	0.00934025	VASP_strain_mp-1097271_1x1x1_0.02.vasp	-2.23392	-2.24092	0.00699291
VASP_strain_mp-631340_1x1x1_-0.05.vasp	-5.26371	-5.34848	0.0847623	VASP_strain_mp-631340_1x1x1_-0.05.vasp	-5.26371	-5.32927	0.0655598
VASP_strain_mp-866140_1x1x1_-0.02.vasp	-5.92451	-6.00319	0.0786712	VASP_strain_mp-866140_1x1x1_-0.02.vasp	-5.92451	-5.96453	0.0400165
VASP_strain_mp-1064719_1x1x1_0.03.vasp	-5.5165	-5.43988	0.0766228	VASP_strain_mp-1064719_1x1x1_0.03.vasp	-5.5165	-5.53747	0.020965
VASP_strain_mp-1187708_1x1x1_-0.05.vasp	-5.18757	-5.27797	0.0904076	VASP_strain_mp-1187708_1x1x1_-0.05.vasp	-5.18757	-5.28602	0.0984487
VASP_strain_mp-1097095_1x1x1_-0.02.vasp	-1.29272	-1.30585	0.0131285	VASP_strain_mp-1097095_1x1x1_-0.02.vasp	-1.29272	-1.30828	0.0155571
VASP_strain_mp-1185040_1x1x1_-0.01.vasp	-7.37432	-7.39812	0.0238008	VASP_strain_mp-1185040_1x1x1_-0.01.vasp	-7.37432	-7.41931	0.0449929
VASP_strain_mp-20132_1x1x1_0.05.vasp	-1.37301	-1.38311	0.0101021	VASP_strain_mp-20132_1x1x1_0.05.vasp	-1.37301	-1.37034	0.00267216
VASP_strain_mp-1186908_1x1x1_0.04.vasp	-3.96305	-3.92624	0.036808	VASP_strain_mp-1186908_1x1x1_0.04.vasp	-3.96305	-3.98302	0.0199687
VASP_strain_mp-1009080_1x1x1_0.03.vasp	-2.1865	-2.17466	0.01184	VASP_strain_mp-1009080_1x1x1_0.03.vasp	-2.1865	-2.079	0.107498
VASP_strain_mp-2755_1x1x1_-0.01.vasp	-3.85565	-3.88147	0.0258227	VASP_strain_mp-2755_1x1x1_-0.01.vasp	-3.85565	-3.89498	0.0393364
VASP_strain_mp-1215223_1x1x1_0.02.vasp	-8.72693	-8.68958	0.0373449	VASP_strain_mp-1215223_1x1x1_0.02.vasp	-8.72693	-8.67729	0.0496307
VASP_strain_mp-1183580_1x1x1_0.02.vasp	-1.40402	-1.42323	0.0192103	VASP_strain_mp-1183580_1x1x1_0.02.vasp	-1.40402	-1.35998	0.0440393
VASP_strain_mp-1185416_1x1x1_0.03.vasp	-3.63198	-3.56986	0.0621202	VASP_strain_mp-1185416_1x1x1_0.03.vasp	-3.63198	-3.58746	0.0445225
VASP_strain_mp-976847_1x1x1_-0.03.vasp	-5.27286	-5.38541	0.112555	VASP_strain_mp-976847_1x1x1_-0.03.vasp	-5.27286	-5.40015	0.127292
VASP_strain_mp-1096179_1x1x1_-0.04.vasp	-0.992102	-1.01344	0.0213389	VASP_strain_mp-1096179_1x1x1_-0.04.vasp	-0.992102	-1.02595	0.0338465
VASP_strain_mp-7885_1x1x1_0.04.vasp	-4.36696	-4.18439	0.182571	VASP_strain_mp-7885_1x1x1_0.04.vasp	-4.36696	-4.31812	0.0488362
VASP_strain_mp-12793_1x1x1_0.05.vasp	-4.57158	-4.54864	0.0229473	VASP_strain_mp-12793_1x1x1_0.05.vasp	-4.57158	-4.50641	0.0651709
VASP_strain_mp-1096551_1x1x1_-0.03.vasp	-3.85996	-3.87962	0.0196616	VASP_strain_mp-1096551_1x1x1_-0.03.vasp	-3.85996	-3.91001	0.0500485
VASP_strain_mp-1183463_1x1x1_-0.01.vasp	-2.32366	-2.32979	0.00613092	VASP_strain_mp-1183463_1x1x1_-0.01.vasp	-2.32366	-2.32014	0.00352312
VASP_strain_mp-975590_1x1x1_0.02.vasp	-0.0467578	0.018787	0.0655448	VASP_strain_mp-975590_1x1x1_0.02.vasp	-0.0467578	0.0461504	0.0929082
VASP_strain_mp-1001913_1x1x1_0.04.vasp	-4.76715	-4.78167	0.0145223	VASP_strain_mp-1001913_1x1x1_0.04.vasp	-4.76715	-4.74846	0.0186878
VASP_strain_mp-973278_1x1x1_-0.03.vasp	-1.38586	-1.39941	0.0135559	VASP_strain_mp-973278_1x1x1_-0.03.vasp	-1.38586	-1.44989	0.0640305
VASP_strain_mp-1222005_1x1x1_0.03.vasp	-7.59847	-7.54719	0.0512788	VASP_strain_mp-1222005_1x1x1_0.03.vasp	-7.59847	-7.52787	0.0705962
VASP_strain_mp-631425_1x1x1_-0.02.vasp	-6.91396	-7.09815	0.184199	VASP_strain_mp-631425_1x1x1_-0.02.vasp	-6.91396	-7.11273	0.198771
VASP_strain_mp-972536_1x1x1_0.02.vasp	-3.89068	-3.86968	0.0209955	VASP_strain_mp-972536_1x1x1_0.02.vasp	-3.89068	-3.81533	0.0753438
VASP_strain_mp-1185337_1x1x1_0.03.vasp	-0.793782	-0.803057	0.00927493	VASP_strain_mp-1185337_1x1x1_0.03.vasp	-0.793782	-0.790795	0.00298731
VASP_strain_mp-22210_1x1x1_-0.02.vasp	-6.1861	-6.22836	0.0422515	VASP_strain_mp-22210_1x1x1_-0.02.vasp	-6.1861	-6.10194	0.0841679
VASP_strain_mp-1227305_1x1x1_0.03.vasp	-3.36672	-3.52559	0.158867	VASP_strain_mp-1227305_1x1x1_0.03.vasp	-3.36672	-3.61313	0.246409
VASP_strain_mp-1221067_1x1x1_0.02.vasp	-5.55299	-5.58097	0.0279841	VASP_strain_mp-1221067_1x1x1_0.02.vasp	-5.55299	-5.56294	0.00995061
VASP_strain_mp-862473_1x1x1_-0.04.vasp	-6.51795	-6.61658	0.0986254	VASP_strain_mp-862473_1x1x1_-0.04.vasp	-6.51795	-6.61962	0.101665
VASP_strain_mp-972209_1x1x1_0.01.vasp	-12.0013	-11.9593	0.0419745	VASP_strain_mp-972209_1x1x1_0.01.vasp	-12.0013	-11.9439	0.0573994
VASP_strain_mp-1096657_1x1x1_-0.03.vasp	-4.29746	-4.33279	0.0353278	VASP_strain_mp-1096657_1x1x1_-0.03.vasp	-4.29746	-4.34769	0.0502288
VASP_strain_mp-1009733_1x1x1_0.02.vasp	-3.53871	-3.46682	0.0718884	VASP_strain_mp-1009733_1x1x1_0.02.vasp	-3.53871	-3.40663	0.132073
VASP_strain_mp-1206669_1x1x1_0.05.vasp	-3.5493	-3.18171	0.367597	VASP_strain_mp-1206669_1x1x1_0.05.vasp	-3.5493	-3.34752	0.201786
VASP_strain_mp-8003_1x1x1_0.05.vasp	-6.12714	-6.21405	0.0869068	VASP_strain_mp-8003_1x1x1_0.05.vasp	-6.12714	-6.69503	0.567884
VASP_strain_mp-864966_1x1x1_-0.04.vasp	-8.6383	-8.7815	0.143198	VASP_strain_mp-864966_1x1x1_-0.04.vasp	-8.6383	-8.68083	0.0425248
VASP_strain_mp-571211_1x1x1_0.05.vasp	-7.42168	-7.27294	0.148739	VASP_strain_mp-571211_1x1x1_0.05.vasp	-7.42168	-7.26665	0.155036
VASP_strain_mp-1147670_1x1x1_-0.03.vasp	-3.84049	-4.00481	0.164322	VASP_strain_mp-1147670_1x1x1_-0.03.vasp	-3.84049	-3.95491	0.114427
VASP_strain_mp-1217323_1x1x1_-0.01.vasp	-9.54345	-9.57982	0.0363746	VASP_strain_mp-1217323_1x1x1_-0.01.vasp	-9.54345	-9.5172	0.0262535
VASP_strain_mp-30836_1x1x1_0.04.vasp	-7.32302	-7.18077	0.142251	VASP_strain_mp-30836_1x1x1_0.04.vasp	-7.32302	-7.19694	0.126082
VASP_strain_mp-1096336_1x1x1_0.03.vasp	-1.88217	-1.86896	0.0132082	VASP_strain_mp-1096336_1x1x1_0.03.vasp	-1.88217	-1.88172	0.000451127
VASP_strain_mp-1223979_1x1x1_-0.04.vasp	-2.96483	-2.94527	0.0195611	VASP_strain_mp-1223979_1x1x1_-0.04.vasp	-2.96483	-3.01543	0.0506019
VASP_strain_mp-1219459_1x1x1_0.01.vasp	-3.45578	-3.43533	0.0204514	VASP_strain_mp-1219459_1x1x1_0.01.vasp	-3.45578	-3.43844	0.0173413
VASP_strain_mp-10760_1x1x1_-0.02.vasp	-3.73864	-3.7322	0.00643873	VASP_strain_mp-10760_1x1x1_-0.02.vasp	-3.73864	-3.80612	0.0674784
VASP_strain_mp-1093692_1x1x1_-0.03.vasp	-2.02452	-1.95213	0.0723906	VASP_strain_mp-1093692_1x1x1_-0.03.vasp	-2.02452	-2.01839	0.00613455
VASP_strain_mp-1062805_1x1x1_0.05.vasp	-3.87545	-3.89876	0.0233026	VASP_strain_mp-1062805_1x1x1_0.05.vasp	-3.87545	-3.87447	0.000987854
VASP_strain_mp-1217621_1x1x1_-0.01.vasp	-4.58883	-4.61042	0.0215913	VASP_strain_mp-1217621_1x1x1_-0.01.vasp	-4.58883	-4.57508	0.0137513
VASP_strain_mp-1183199_1x1x1_0.01.vasp	-5.49842	-5.48186	0.0165616	VASP_strain_mp-1183199_1x1x1_0.01.vasp	-5.49842	-5.46634	0.0320875
VASP_strain_mp-1215299_1x1x1_0.05.vasp	-6.56797	-6.4992	0.0687727	VASP_strain_mp-1215299_1x1x1_0.05.vasp	-6.56797	-6.51895	0.049016
VASP_strain_mp-862883_1x1x1_0.04.vasp	-2.28291	-2.24212	0.0407818	VASP_strain_mp-862883_1x1x1_0.04.vasp	-2.28291	-2.24095	0.0419542
VASP_strain_mp-580357_1x1x1_-0.04.vasp	-4.20152	-4.29003	0.0885129	VASP_strain_mp-580357_1x1x1_-0.04.vasp	-4.20152	-4.26161	0.0600942
VASP_strain_mp-1187098_1x1x1_0.05.vasp	-2.39914	-2.38077	0.0183749	VASP_strain_mp-1187098_1x1x1_0.05.vasp	-2.39914	-2.26367	0.135476
VASP_strain_mp-971951_1x1x1_0.03.vasp	-8.33137	-8.28565	0.0457191	VASP_strain_mp-971951_1x1x1_0.03.vasp	-8.33137	-8.29378	0.0375885
VASP_strain_mp-1093620_1x1x1_0.03.vasp	-1.9559	-1.92591	0.0299892	VASP_strain_mp-1093620_1x1x1_0.03.vasp	-1.9559	-1.86167	0.0942382
VASP_strain_mp-1184522_1x1x1_0.04.vasp	-4.39084	-4.34222	0.0486203	VASP_strain_mp-1184522_1x1x1_0.04.vasp	-4.39084	-4.34554	0.0452948
VASP_strain_mp-1018067_1x1x1_0.02.vasp	-8.50956	-8.49996	0.00959251	VASP_strain_mp-1018067_1x1x1_0.02.vasp	-8.50956	-8.43061	0.0789455
VASP_strain_mp-1185786_1x1x1_0.01.vasp	-1.7266	-1.70762	0.0189875	VASP_strain_mp-1185786_1x1x1_0.01.vasp	-1.7266	-1.71807	0.00853504
VASP_strain_mp-10207_1x1x1_-0.03.vasp	-12.2966	-12.355	0.0584174	VASP_strain_mp-10207_1x1x1_-0.03.vasp	-12.2966	-12.2186	0.0780342
VASP_strain_mp-1064459_1x1x1_-0.04.vasp	-2.44882	-2.45479	0.00596813	VASP_strain_mp-1064459_1x1x1_-0.04.vasp	-2.44882	-2.48244	0.0336213
VASP_strain_mp-1186718_1x1x1_-0.05.vasp	-3.92952	-3.97845	0.0489321	VASP_strain_mp-1186718_1x1x1_-0.05.vasp	-3.92952	-3.99411	0.0645908
VASP_strain_mp-1279484_1x1x1_-0.01.vasp	-5.10432	-5.13211	0.0277931	VASP_strain_mp-1279484_1x1x1_-0.01.vasp	-5.10432	-5.10005	0.00427005
VASP_strain_mp-1183967_1x1x1_0.04.vasp	-2.75167	-2.75643	0.00475475	VASP_strain_mp-1183967_1x1x1_0.04.vasp	-2.75167	-2.79217	0.0405001
VASP_strain_mp-1093730_1x1x1_-0.03.vasp	-2.62826	-2.59136	0.0369003	VASP_strain_mp-1093730_1x1x1_-0.03.vasp	-2.62826	-2.61171	0.0165428
VASP_strain_mp-1184587_1x1x1_0.05.vasp	-10.4224	-10.2795	0.142925	VASP_strain_mp-1184587_1x1x1_0.05.vasp	-10.4224	-10.2541	0.168299
VASP_strain_mp-865562_1x1x1_0.01.vasp	-5.44869	-5.39787	0.0508157	VASP_strain_mp-865562_1x1x1_0.01.vasp	-5.44869	-5.24612	0.202571
VASP_strain_mp-1096018_1x1x1_-0.01.vasp	-1.2513	-1.24268	0.00862178	VASP_strain_mp-1096018_1x1x1_-0.01.vasp	-1.2513	-1.28184	0.0305357
VASP_strain_mp-978882_1x1x1_-0.04.vasp	-3.71478	-3.82023	0.105449	VASP_strain_mp-978882_1x1x1_-0.04.vasp	-3.71478	-3.81157	0.0967922
VASP_strain_mp-961711_1x1x1_0.05.vasp	-7.66944	-7.55435	0.115092	VASP_strain_mp-961711_1x1x1_0.05.vasp	-7.66944	-7.46502	0.204416
VASP_strain_mp-1183549_1x1x1_0.05.vasp	-3.77687	-3.78629	0.00941586	VASP_strain_mp-1183549_1x1x1_0.05.vasp	-3.77687	-3.73827	0.038604
VASP_strain_mp-675349_1x1x1_-0.01.vasp	-5.03518	-5.05127	0.0160908	VASP_strain_mp-675349_1x1x1_-0.01.vasp	-5.03518	-5.01169	0.023491
VASP_strain_mp-1097265_1x1x1_0.02.vasp	-3.92339	-3.90972	0.0136784	VASP_strain_mp-1097265_1x1x1_0.02.vasp	-3.92339	-3.91931	0.00407923
VASP_strain_mp-1207143_1x1x1_-0.05.vasp	-2.72455	-2.82999	0.10544	VASP_strain_mp-1207143_1x1x1_-0.05.vasp	-2.72455	-2.85049	0.125944
VASP_strain_mp-1097362_1x1x1_0.03.vasp	-2.14511	-2.16877	0.0236641	VASP_strain_mp-1097362_1x1x1_0.03.vasp	-2.14511	-2.18022	0.0351131
VASP_strain_mp-1222295_1x1x1_-0.05.vasp	-5.02621	-5.12317	0.0969574	VASP_strain_mp-1222295_1x1x1_-0.05.vasp	-5.02621	-5.10965	0.083436
VASP_strain_mp-112_1x1x1_-0.05.vasp	-6.41748	-6.45141	0.0339336	VASP_strain_mp-112_1x1x1_-0.05.vasp	-6.41748	-6.42056	0.00308253
VASP_strain_mp-1007853_1x1x1_0.01.vasp	-7.53663	-7.4972	0.0394267	VASP_strain_mp-1007853_1x1x1_0.01.vasp	-7.53663	-7.451	0.0856297
VASP_strain_mp-975787_1x1x1_-0.03.vasp	-10.1002	-10.1546	0.0543319	VASP_strain_mp-975787_1x1x1_-0.03.vasp	-10.1002	-10.3047	0.204519
VASP_strain_mp-1187906_1x1x1_-0.02.vasp	-2.15971	-2.1898	0.0300968	VASP_strain_mp-1187906_1x1x1_-0.02.vasp	-2.15971	-2.21325	0.0535413
VASP_strain_mp-1227725_1x1x1_-0.04.vasp	-1.76851	-1.76313	0.00538058	VASP_strain_mp-1227725_1x1x1_-0.04.vasp	-1.76851	-1.83774	0.0692273
VASP_strain_mp-1008986_1x1x1_-0.01.vasp	-7.10237	-7.16423	0.0618645	VASP_strain_mp-1008986_1x1x1_-0.01.vasp	-7.10237	-7.13228	0.029915
VASP_strain_mp-1096217_1x1x1_-0.03.vasp	-1.81494	-1.75724	0.0577061	VASP_strain_mp-1096217_1x1x1_-0.03.vasp	-1.81494	-1.84536	0.0304177
VASP_strain_mp-1183621_1x1x1_0.02.vasp	-2.07924	-2.053	0.0262418	VASP_strain_mp-1183621_1x1x1_0.02.vasp	-2.07924	-2.06808	0.0111592
VASP_strain_mp-999139_1x1x1_-0.03.vasp	-5.81936	-5.91377	0.0944177	VASP_strain_mp-999139_1x1x1_-0.03.vasp	-5.81936	-5.94642	0.127061
VASP_strain_mp-1096315_1x1x1_0.04.vasp	-4.68756	-4.67512	0.0124442	VASP_strain_mp-1096315_1x1x1_0.04.vasp	-4.68756	-4.70732	0.0197596
VASP_strain_mp-16728_1x1x1_-0.01.vasp	-6.75621	-6.78691	0.030701	VASP_strain_mp-16728_1x1x1_-0.01.vasp	-6.75621	-6.75454	0.00167291
VASP_strain_mp-1009769_1x1x1_0.01.vasp	-7.8824	-7.84455	0.0378524	VASP_strain_mp-1009769_1x1x1_0.01.vasp	-7.8824	-7.77053	0.111876
VASP_strain_mp-865398_1x1x1_0.03.vasp	-4.88587	-4.77077	0.115102	VASP_strain_mp-865398_1x1x1_0.03.vasp	-4.88587	-4.74316	0.142705
VASP_strain_mp-2117_1x1x1_-0.03.vasp	-8.10049	-8.18831	0.0878186	VASP_strain_mp-2117_1x1x1_-0.03.vasp	-8.10049	-8.10493	0.0044433
VASP_strain_mp-1188022_1x1x1_-0.02.vasp	-8.5774	-8.46843	0.108967	VASP_strain_mp-1188022_1x1x1_-0.02.vasp	-8.5774	-8.45692	0.120479
VASP_strain_mp-1187910_1x1x1_0.03.vasp	-5.93305	-5.81328	0.119778	VASP_strain_mp-1187910_1x1x1_0.03.vasp	-5.93305	-5.78538	0.147679
VASP_strain_mp-1172_1x1x1_0.01.vasp	-4.81611	-4.79536	0.0207534	VASP_strain_mp-1172_1x1x1_0.01.vasp	-4.81611	-4.77016	0.0459452
VASP_strain_mp-1094505_1x1x1_-0.02.vasp	-1.36774	-1.37314	0.00540826	VASP_strain_mp-1094505_1x1x1_-0.02.vasp	-1.36774	-1.37444	0.00670181
VASP_strain_mp-1185411_1x1x1_0.03.vasp	-8.07573	-8.06643	0.00929572	VASP_strain_mp-1185411_1x1x1_0.03.vasp	-8.07573	-8.06305	0.0126821
VASP_strain_mp-1183358_1x1x1_0.03.vasp	-8.27227	-8.36736	0.0950955	VASP_strain_mp-1183358_1x1x1_0.03.vasp	-8.27227	-8.16303	0.109237
VASP_strain_mp-1184651_1x1x1_-0.03.vasp	-0.986847	-1.08809	0.101242	VASP_strain_mp-1184651_1x1x1_-0.03.vasp	-0.986847	-1.13099	0.144146
VASP_strain_mp-1186397_1x1x1_0.03.vasp	-5.02419	-4.98263	0.0415624	VASP_strain_mp-1186397_1x1x1_0.03.vasp	-5.02419	-4.92948	0.0947034
VASP_strain_mp-1187599_1x1x1_-0.02.vasp	-4.45006	-4.49734	0.047276	VASP_strain_mp-1187599_1x1x1_-0.02.vasp	-4.45006	-4.49355	0.0434913
VASP_strain_mp-631472_1x1x1_0.04.vasp	-4.47737	-4.76749	0.290115	VASP_strain_mp-631472_1x1x1_0.04.vasp	-4.47737	-4.49991	0.0225384
VASP_strain_mp-1093612_1x1x1_-0.02.vasp	-4.5732	-4.60274	0.029538	VASP_strain_mp-1093612_1x1x1_-0.02.vasp	-4.5732	-4.63583	0.0626324
VASP_strain_mp-1061691_1x1x1_-0.02.vasp	-4.19648	-4.34767	0.151195	VASP_strain_mp-1061691_1x1x1_-0.02.vasp	-4.19648	-4.26092	0.0644457
VASP_strain_mp-971744_1x1x1_-0.01.vasp	-5.49344	-5.51872	0.0252727	VASP_strain_mp-971744_1x1x1_-0.01.vasp	-5.49344	-5.49437	0.000927838
VASP_strain_mp-8002_1x1x1_-0.01.vasp	-5.63972	-5.65792	0.0182031	VASP_strain_mp-8002_1x1x1_-0.01.vasp	-5.63972	-5.56611	0.0736055
VASP_strain_mp-974744_1x1x1_-0.05.vasp	-2.68282	-2.77262	0.0898018	VASP_strain_mp-974744_1x1x1_-0.05.vasp	-2.68282	-2.77201	0.0891912
VASP_strain_mp-20258_1x1x1_-0.04.vasp	-3.50683	-3.54735	0.0405178	VASP_strain_mp-20258_1x1x1_-0.04.vasp	-3.50683	-3.56294	0.0561061
VASP_strain_mp-1187496_1x1x1_-0.03.vasp	-2.65878	-2.65611	0.00266934	VASP_strain_mp-1187496_1x1x1_-0.03.vasp	-2.65878	-2.66887	0.0100949
VASP_strain_mp-1095718_1x1x1_0.02.vasp	-1.63474	-1.63289	0.00184312	VASP_strain_mp-1095718_1x1x1_0.02.vasp	-1.63474	-1.64421	0.00947347
VASP_strain_mp-1096980_1x1x1_0.04.vasp	-5.95495	-6.01414	0.059196	VASP_strain_mp-1096980_1x1x1_0.04.vasp	-5.95495	-5.93148	0.0234722
VASP_strain_mp-1246308_1x1x1_0.04.vasp	-3.7152	-3.69281	0.0223932	VASP_strain_mp-1246308_1x1x1_0.04.vasp	-3.7152	-3.6754	0.0397941
VASP_strain_mp-1096423_1x1x1_0.02.vasp	-0.666321	-0.67447	0.00814969	VASP_strain_mp-1096423_1x1x1_0.02.vasp	-0.666321	-0.652729	0.0135915
VASP_strain_mp-1222908_1x1x1_-0.04.vasp	-6.24162	-6.25945	0.0178297	VASP_strain_mp-1222908_1x1x1_-0.04.vasp	-6.24162	-6.36011	0.118489
VASP_strain_mp-571185_1x1x1_0.03.vasp	-6.81855	-6.85861	0.0400639	VASP_strain_mp-571185_1x1x1_0.03.vasp	-6.81855	-6.86302	0.044474
VASP_strain_mp-1185386_1x1x1_-0.03.vasp	-3.06143	-3.10714	0.0457049	VASP_strain_mp-1185386_1x1x1_-0.03.vasp	-3.06143	-3.09269	0.0312518
VASP_strain_mp-1183464_1x1x1_0.02.vasp	-1.68149	-1.69459	0.0131083	VASP_strain_mp-1183464_1x1x1_0.02.vasp	-1.68149	-1.67614	0.00534689
VASP_strain_mp-1210627_1x1x1_-0.01.vasp	-7.47085	-7.43452	0.036332	VASP_strain_mp-1210627_1x1x1_-0.01.vasp	-7.47085	-7.40697	0.0638758
VASP_strain_mp-644272_1x1x1_0.05.vasp	-6.66356	-6.64775	0.0158125	VASP_strain_mp-644272_1x1x1_0.05.vasp	-6.66356	-6.76481	0.101244
VASP_strain_mp-21148_1x1x1_0.05.vasp	-3.96964	-3.90694	0.0626944	VASP_strain_mp-21148_1x1x1_0.05.vasp	-3.96964	-3.90793	0.0617075
VASP_strain_mp-1187503_1x1x1_-0.01.vasp	-3.57879	-3.57558	0.00320683	VASP_strain_mp-1187503_1x1x1_-0.01.vasp	-3.57879	-3.58362	0.00482725
VASP_strain_mp-1186466_1x1x1_0.02.vasp	-7.29809	-7.26145	0.0366486	VASP_strain_mp-1186466_1x1x1_0.02.vasp	-7.29809	-7.24844	0.0496588
VASP_strain_mp-974981_1x1x1_0.03.vasp	-0.913407	-0.878881	0.0345258	VASP_strain_mp-974981_1x1x1_0.03.vasp	-0.913407	-0.822143	0.0912636
VASP_strain_mp-30760_1x1x1_-0.01.vasp	-2.65019	-2.68023	0.0300334	VASP_strain_mp-30760_1x1x1_-0.01.vasp	-2.65019	-2.63714	0.0130481
VASP_strain_mp-1097390_1x1x1_0.04.vasp	-5.83867	-5.80735	0.031317	VASP_strain_mp-1097390_1x1x1_0.04.vasp	-5.83867	-5.80787	0.0307978
VASP_strain_mp-27913_1x1x1_0.02.vasp	-6.10262	-6.07349	0.0291333	VASP_strain_mp-27913_1x1x1_0.02.vasp	-6.10262	-5.99733	0.105292
VASP_strain_mp-863739_1x1x1_0.01.vasp	-5.515	-5.51753	0.00252946	VASP_strain_mp-863739_1x1x1_0.01.vasp	-5.515	-5.47546	0.0395447
VASP_strain_mp-1002222_1x1x1_0.02.vasp	-4.11035	-4.0802	0.0301459	VASP_strain_mp-1002222_1x1x1_0.02.vasp	-4.11035	-4.05017	0.0601781
VASP_strain_mp-982773_1x1x1_0.01.vasp	-1.6193	-1.62914	0.00984771	VASP_strain_mp-982773_1x1x1_0.01.vasp	-1.6193	-1.60632	0.0129715
VASP_strain_mp-865011_1x1x1_0.02.vasp	-8.19909	-8.1977	0.00139504	VASP_strain_mp-865011_1x1x1_0.02.vasp	-8.19909	-8.15122	0.0478726
VASP_strain_mp-21432_1x1x1_-0.03.vasp	-4.33357	-4.38983	0.056261	VASP_strain_mp-21432_1x1x1_-0.03.vasp	-4.33357	-4.36689	0.0333238
VASP_strain_mp-1100417_1x1x1_-0.01.vasp	-7.10001	-7.22015	0.120135	VASP_strain_mp-1100417_1x1x1_-0.01.vasp	-7.10001	-7.15274	0.0527254
VASP_strain_mp-1038788_1x1x1_-0.03.vasp	-3.68728	-3.70852	0.021241	VASP_strain_mp-1038788_1x1x1_-0.03.vasp	-3.68728	-3.76979	0.0825102
VASP_strain_mp-624070_1x1x1_0.05.vasp	-5.16812	-5.11486	0.0532691	VASP_strain_mp-624070_1x1x1_0.05.vasp	-5.16812	-5.12474	0.0433826
VASP_strain_mp-1186556_1x1x1_-0.02.vasp	-3.78116	-3.8106	0.029445	VASP_strain_mp-1186556_1x1x1_-0.02.vasp	-3.78116	-3.79032	0.00916461
VASP_strain_mp-448_1x1x1_0.03.vasp	-7.57811	-7.50663	0.0714854	VASP_strain_mp-448_1x1x1_0.03.vasp	-7.57811	-7.48766	0.0904557
VASP_strain_mp-30419_1x1x1_-0.01.vasp	-5.58737	-5.6616	0.0742298	VASP_strain_mp-30419_1x1x1_-0.01.vasp	-5.58737	-5.63065	0.0432788
VASP_strain_mp-631521_1x1x1_-0.05.vasp	-6.35448	-6.4827	0.128222	VASP_strain_mp-631521_1x1x1_-0.05.vasp	-6.35448	-6.49324	0.138759
VASP_strain_mp-867182_1x1x1_-0.02.vasp	-5.34454	-5.38976	0.0452218	VASP_strain_mp-867182_1x1x1_-0.02.vasp	-5.34454	-5.38898	0.0444371
VASP_strain_mp-1186682_1x1x1_0.03.vasp	-2.99259	-2.98325	0.00934604	VASP_strain_mp-1186682_1x1x1_0.03.vasp	-2.99259	-2.94365	0.0489485
VASP_strain_mp-861985_1x1x1_-0.01.vasp	-7.1969	-7.2128	0.0159043	VASP_strain_mp-861985_1x1x1_-0.01.vasp	-7.1969	-7.21351	0.0166158
VASP_strain_mp-11258_1x1x1_-0.05.vasp	-4.7341	-4.83528	0.101175	VASP_strain_mp-11258_1x1x1_-0.05.vasp	-4.7341	-4.80152	0.0674131
VASP_strain_mp-22851_1x1x1_-0.05.vasp	-3.21914	-3.2521	0.0329617	VASP_strain_mp-22851_1x1x1_-0.05.vasp	-3.21914	-3.27943	0.0602906
VASP_strain_mp-1183144_1x1x1_-0.03.vasp	-3.73314	-3.78167	0.0485269	VASP_strain_mp-1183144_1x1x1_-0.03.vasp	-3.73314	-3.75733	0.024189
VASP_strain_mp-1187406_1x1x1_0.03.vasp	-5.84312	-5.797	0.0461217	VASP_strain_mp-1187406_1x1x1_0.03.vasp	-5.84312	-5.74489	0.0982319
VASP_strain_mp-1221566_1x1x1_0.03.vasp	-6.01695	-5.96147	0.0554741	VASP_strain_mp-1221566_1x1x1_0.03.vasp	-6.01695	-5.89094	0.126005
VASP_strain_mp-1245814_1x1x1_0.04.vasp	-4.66689	-4.64053	0.0263599	VASP_strain_mp-1245814_1x1x1_0.04.vasp	-4.66689	-4.62577	0.0411254
VASP_strain_mp-30555_1x1x1_0.01.vasp	-7.53647	-7.47818	0.0582959	VASP_strain_mp-30555_1x1x1_0.01.vasp	-7.53647	-7.44677	0.0897001
VASP_strain_mp-1097000_1x1x1_-0.02.vasp	-3.73103	-3.75113	0.0200995	VASP_strain_mp-1097000_1x1x1_-0.02.vasp	-3.73103	-3.75363	0.0225947
VASP_strain_mp-1216653_1x1x1_0.02.vasp	-10.3506	-10.2681	0.0825568	VASP_strain_mp-1216653_1x1x1_0.02.vasp	-10.3506	-10.2827	0.0679216
VASP_strain_mp-1187102_1x1x1_0.02.vasp	-1.87931	-1.82565	0.0536626	VASP_strain_mp-1187102_1x1x1_0.02.vasp	-1.87931	-1.82714	0.0521728
VASP_strain_mp-1186508_1x1x1_-0.02.vasp	-4.48762	-4.56197	0.0743578	VASP_strain_mp-1186508_1x1x1_-0.02.vasp	-4.48762	-4.54666	0.0590415
VASP_strain_mp-862761_1x1x1_-0.04.vasp	-4.36668	-4.44298	0.0763003	VASP_strain_mp-862761_1x1x1_-0.04.vasp	-4.36668	-4.48411	0.117438
VASP_strain_mp-22589_1x1x1_-0.04.vasp	-6.21604	-6.31974	0.103694	VASP_strain_mp-22589_1x1x1_-0.04.vasp	-6.21604	-6.14683	0.0692169
VASP_strain_mp-21845_1x1x1_-0.03.vasp	-6.07507	-6.00964	0.0654293	VASP_strain_mp-21845_1x1x1_-0.03.vasp	-6.07507	-6.09114	0.0160789
VASP_strain_mp-1215329_1x1x1_-0.02.vasp	-4.75408	-4.79664	0.042561	VASP_strain_mp-1215329_1x1x1_-0.02.vasp	-4.75408	-4.7235	0.0305762
VASP_strain_mp-864624_1x1x1_-0.04.vasp	-5.67172	-5.78823	0.116512	VASP_strain_mp-864624_1x1x1_-0.04.vasp	-5.67172	-5.83817	0.166443
VASP_strain_mp-1039447_1x1x1_0.02.vasp	-1.57479	-1.57536	0.000578584	VASP_strain_mp-1039447_1x1x1_0.02.vasp	-1.57479	-1.56024	0.0145425
VASP_strain_mp-1186242_1x1x1_0.01.vasp	-3.8064	-3.81086	0.00445979	VASP_strain_mp-1186242_1x1x1_0.01.vasp	-3.8064	-3.8088	0.00239707
VASP_strain_mp-1184842_1x1x1_0.02.vasp	-8.78751	-8.69431	0.0931959	VASP_strain_mp-1184842_1x1x1_0.02.vasp	-8.78751	-8.63873	0.148779
VASP_strain_mp-632229_1x1x1_0.04.vasp	-2.76694	-2.78873	0.0217924	VASP_strain_mp-632229_1x1x1_0.04.vasp	-2.76694	-2.75697	0.00996383
VASP_strain_mp-862717_1x1x1_-0.05.vasp	-3.55619	-3.62452	0.0683299	VASP_strain_mp-862717_1x1x1_-0.05.vasp	-3.55619	-3.63114	0.0749455
VASP_strain_mp-7237_1x1x1_0.05.vasp	-4.43599	-4.35597	0.0800193	VASP_strain_mp-7237_1x1x1_0.05.vasp	-4.43599	-4.35162	0.0843731
VASP_strain_mp-1187388_1x1x1_0.01.vasp	-7.52209	-7.50681	0.0152813	VASP_strain_mp-1187388_1x1x1_0.01.vasp	-7.52209	-7.48079	0.0412966
VASP_strain_mp-12775_1x1x1_-0.02.vasp	-8.83859	-8.97819	0.1396	VASP_strain_mp-12775_1x1x1_-0.02.vasp	-8.83859	-9.02018	0.181592
VASP_strain_mp-2132_1x1x1_-0.02.vasp	-9.26989	-9.28727	0.0173798	VASP_strain_mp-2132_1x1x1_-0.02.vasp	-9.26989	-9.25097	0.0189194
VASP_strain_mp-1008224_1x1x1_0.02.vasp	-7.55167	-7.50883	0.0428441	VASP_strain_mp-1008224_1x1x1_0.02.vasp	-7.55167	-7.42619	0.125487
VASP_strain_mp-1184885_1x1x1_-0.02.vasp	-6.42564	-6.45286	0.0272238	VASP_strain_mp-1184885_1x1x1_-0.02.vasp	-6.42564	-6.41653	0.00910736
VASP_strain_mp-1187002_1x1x1_0.03.vasp	-3.09225	-3.07091	0.0213396	VASP_strain_mp-1187002_1x1x1_0.03.vasp	-3.09225	-3.04077	0.0514732
VASP_strain_mp-1184549_1x1x1_0.05.vasp	-5.91332	-5.83825	0.0750739	VASP_strain_mp-1184549_1x1x1_0.05.vasp	-5.91332	-5.84089	0.0724275
VASP_strain_mp-757021_1x1x1_-0.04.vasp	-6.6066	-6.69565	0.0890496	VASP_strain_mp-757021_1x1x1_-0.04.vasp	-6.6066	-6.69052	0.0839233
VASP_strain_mp-861954_1x1x1_-0.05.vasp	-8.19545	-8.34455	0.1491	VASP_strain_mp-861954_1x1x1_-0.05.vasp	-8.19545	-8.26476	0.0693068
VASP_strain_mp-1095751_1x1x1_-0.02.vasp	-2.24306	-2.23082	0.0122428	VASP_strain_mp-1095751_1x1x1_-0.02.vasp	-2.24306	-2.27579	0.0327296
VASP_strain_mp-983426_1x1x1_0.02.vasp	-4.3868	-4.3657	0.0211001	VASP_strain_mp-983426_1x1x1_0.02.vasp	-4.3868	-4.36697	0.0198356
VASP_strain_mp-2522_1x1x1_0.03.vasp	-2.78366	-2.74945	0.0342113	VASP_strain_mp-2522_1x1x1_0.03.vasp	-2.78366	-2.73363	0.050029
VASP_strain_mp-1097207_1x1x1_0.05.vasp	-5.78873	-5.81321	0.0244828	VASP_strain_mp-1097207_1x1x1_0.05.vasp	-5.78873	-5.74302	0.0457091
VASP_strain_mp-1183998_1x1x1_-0.04.vasp	-4.78986	-4.97977	0.189911	VASP_strain_mp-1183998_1x1x1_-0.04.vasp	-4.78986	-4.81731	0.0274438
VASP_strain_mp-1995_1x1x1_-0.03.vasp	-7.82277	-7.79241	0.0303628	VASP_strain_mp-1995_1x1x1_-0.03.vasp	-7.82277	-7.85294	0.0301739
VASP_strain_mp-1076920_1x1x1_0.02.vasp	-10.741	-10.6012	0.139784	VASP_strain_mp-1076920_1x1x1_0.02.vasp	-10.741	-10.61	0.131056
VASP_strain_mp-863652_1x1x1_-0.04.vasp	-5.47503	-5.59895	0.123924	VASP_strain_mp-863652_1x1x1_-0.04.vasp	-5.47503	-5.60117	0.126141
VASP_strain_mp-1185306_1x1x1_-0.02.vasp	-6.60866	-6.805	0.196342	VASP_strain_mp-1185306_1x1x1_-0.02.vasp	-6.60866	-6.77735	0.168694
VASP_strain_mp-1093666_1x1x1_-0.05.vasp	-6.31362	-6.5124	0.19878	VASP_strain_mp-1093666_1x1x1_-0.05.vasp	-6.31362	-6.48521	0.171584
VASP_strain_mp-1180648_1x1x1_-0.02.vasp	-2.49005	-2.37873	0.111315	VASP_strain_mp-1180648_1x1x1_-0.02.vasp	-2.49005	-2.46025	0.0297908
VASP_strain_mp-1187823_1x1x1_0.01.vasp	-3.36868	-3.35186	0.0168193	VASP_strain_mp-1187823_1x1x1_0.01.vasp	-3.36868	-3.35507	0.0136024
VASP_strain_mp-33031_1x1x1_0.05.vasp	-7.41814	-7.27372	0.144421	VASP_strain_mp-33031_1x1x1_0.05.vasp	-7.41814	-7.28699	0.131151
VASP_strain_mp-1062162_1x1x1_0.03.vasp	-6.47082	-6.3417	0.129114	VASP_strain_mp-1062162_1x1x1_0.03.vasp	-6.47082	-6.34467	0.126145
VASP_strain_mp-1222671_1x1x1_0.03.vasp	-2.0778	-2.02309	0.0547047	VASP_strain_mp-1222671_1x1x1_0.03.vasp	-2.0778	-2.02139	0.0564066
VASP_strain_mp-1185309_1x1x1_-0.04.vasp	-3.06387	-3.11382	0.049949	VASP_strain_mp-1185309_1x1x1_-0.04.vasp	-3.06387	-3.15144	0.0875681
VASP_strain_mp-20139_1x1x1_0.05.vasp	-7.8827	-7.77847	0.104235	VASP_strain_mp-20139_1x1x1_0.05.vasp	-7.8827	-7.71869	0.164015
VASP_strain_mp-1185933_1x1x1_0.05.vasp	-6.31233	-6.19445	0.117874	VASP_strain_mp-1185933_1x1x1_0.05.vasp	-6.31233	-6.23301	0.0793161
VASP_strain_mp-1096468_1x1x1_-0.05.vasp	-0.997169	-0.924829	0.0723399	VASP_strain_mp-1096468_1x1x1_-0.05.vasp	-0.997169	-0.983434	0.0137347
VASP_strain_mp-1223071_1x1x1_0.02.vasp	-5.53265	-5.50738	0.0252738	VASP_strain_mp-1223071_1x1x1_0.02.vasp	-5.53265	-5.49104	0.041607
VASP_strain_mp-1215232_1x1x1_-0.02.vasp	-10.0846	-10.1834	0.0987514	VASP_strain_mp-1215232_1x1x1_-0.02.vasp	-10.0846	-10.1443	0.059685
VASP_strain_mp-1009747_1x1x1_0.03.vasp	-4.64058	-4.57997	0.0606053	VASP_strain_mp-1009747_1x1x1_0.03.vasp	-4.64058	-4.58223	0.058344
VASP_strain_mp-1181516_1x1x1_-0.05.vasp	-2.68123	-2.77412	0.0928892	VASP_strain_mp-1181516_1x1x1_-0.05.vasp	-2.68123	-2.75208	0.0708438
VASP_strain_mp-1187269_1x1x1_0.05.vasp	-3.28972	-3.26462	0.0251021	VASP_strain_mp-1187269_1x1x1_0.05.vasp	-3.28972	-3.23629	0.0534306
VASP_strain_mp-1184525_1x1x1_-0.05.vasp	-8.46199	-8.66151	0.199523	VASP_strain_mp-1184525_1x1x1_-0.05.vasp	-8.46199	-8.69576	0.233773
VASP_strain_mp-974066_1x1x1_-0.03.vasp	-4.68547	-4.72178	0.0363036	VASP_strain_mp-974066_1x1x1_-0.03.vasp	-4.68547	-4.68459	0.000883454
VASP_strain_mp-22784_1x1x1_-0.04.vasp	-4.78018	-4.82668	0.0465056	VASP_strain_mp-22784_1x1x1_-0.04.vasp	-4.78018	-4.92041	0.140228
VASP_strain_mp-13915_1x1x1_0.02.vasp	-4.45582	-4.43449	0.0213321	VASP_strain_mp-13915_1x1x1_0.02.vasp	-4.45582	-4.42036	0.0354573
VASP_strain_mp-1094944_1x1x1_-0.02.vasp	-1.47577	-1.51278	0.0370103	VASP_strain_mp-1094944_1x1x1_-0.02.vasp	-1.47577	-1.5119	0.0361341
VASP_strain_mp-976286_1x1x1_0.01.vasp	-6.77597	-6.75431	0.0216586	VASP_strain_mp-976286_1x1x1_0.01.vasp	-6.77597	-6.75362	0.0223547
VASP_strain_mp-1176792_1x1x1_-0.04.vasp	-4.02532	-4.09331	0.0679869	VASP_strain_mp-1176792_1x1x1_-0.04.vasp	-4.02532	-4.00008	0.0252444
VASP_strain_mp-1187104_1x1x1_0.01.vasp	-1.92082	-1.89861	0.0222128	VASP_strain_mp-1187104_1x1x1_0.01.vasp	-1.92082	-1.88064	0.0401801
VASP_strain_mp-179_1x1x1_0.03.vasp	-3.85678	-3.96656	0.109773	VASP_strain_mp-179_1x1x1_0.03.vasp	-3.85678	-3.85561	0.00117002
VASP_strain_mp-1018021_1x1x1_0.02.vasp	-7.93561	-7.94419	0.00858652	VASP_strain_mp-1018021_1x1x1_0.02.vasp	-7.93561	-7.87052	0.0650914
VASP_strain_mp-1186917_1x1x1_0.01.vasp	-3.39122	-3.36868	0.0225418	VASP_strain_mp-1186917_1x1x1_0.01.vasp	-3.39122	-3.34216	0.0490595
VASP_strain_mp-1219718_1x1x1_0.02.vasp	-9.35072	-9.31184	0.0388803	VASP_strain_mp-1219718_1x1x1_0.02.vasp	-9.35072	-9.29009	0.0606322
VASP_strain_mp-1183773_1x1x1_-0.04.vasp	-5.17739	-5.29344	0.116045	VASP_strain_mp-1183773_1x1x1_-0.04.vasp	-5.17739	-5.28494	0.107548
VASP_strain_mp-1185495_1x1x1_0.04.vasp	-5.4019	-5.36143	0.0404673	VASP_strain_mp-1185495_1x1x1_0.04.vasp	-5.4019	-5.31574	0.0861527
VASP_strain_mp-1093632_1x1x1_0.03.vasp	-2.60017	-2.54139	0.0587738	VASP_strain_mp-1093632_1x1x1_0.03.vasp	-2.60017	-2.53492	0.0652466
VASP_strain_mp-11578_1x1x1_-0.01.vasp	-3.12595	-3.20193	0.0759848	VASP_strain_mp-11578_1x1x1_-0.01.vasp	-3.12595	-3.08868	0.0372682
VASP_strain_mp-1184341_1x1x1_-0.05.vasp	-3.66632	-3.67218	0.00586201	VASP_strain_mp-1184341_1x1x1_-0.05.vasp	-3.66632	-3.69126	0.0249425
VASP_strain_mp-1039033_1x1x1_-0.03.vasp	-1.5851	-1.62393	0.0388311	VASP_strain_mp-1039033_1x1x1_-0.03.vasp	-1.5851	-1.64789	0.0627933
VASP_strain_mp-983430_1x1x1_0.01.vasp	-6.666	-6.61229	0.0537038	VASP_strain_mp-983430_1x1x1_0.01.vasp	-6.666	-6.62858	0.0374124
VASP_strain_mp-20033_1x1x1_-0.04.vasp	-6.54496	-6.6965	0.151541	VASP_strain_mp-20033_1x1x1_-0.04.vasp	-6.54496	-6.66925	0.124289
VASP_strain_mp-865499_1x1x1_0.03.vasp	-10.2182	-10.0457	0.172491	VASP_strain_mp-865499_1x1x1_0.03.vasp	-10.2182	-10.1759	0.0422213
VASP_strain_mp-972511_1x1x1_0.05.vasp	-4.47173	-4.43196	0.0397668	VASP_strain_mp-972511_1x1x1_0.05.vasp	-4.47173	-4.38637	0.0853566
VASP_strain_mp-1096381_1x1x1_0.01.vasp	-2.72898	-2.696	0.0329885	VASP_strain_mp-1096381_1x1x1_0.01.vasp	-2.72898	-2.64424	0.0847423
VASP_strain_mp-631421_1x1x1_-0.02.vasp	-4.68552	-4.72295	0.0374349	VASP_strain_mp-631421_1x1x1_-0.02.vasp	-4.68552	-4.77232	0.0868033
VASP_strain_mp-1094790_1x1x1_0.02.vasp	-1.44051	-1.44246	0.0019483	VASP_strain_mp-1094790_1x1x1_0.02.vasp	-1.44051	-1.46253	0.0220168
VASP_strain_mp-861672_1x1x1_-0.01.vasp	-8.84262	-8.91269	0.0700734	VASP_strain_mp-861672_1x1x1_-0.01.vasp	-8.84262	-8.87509	0.0324714
VASP_strain_mp-1183161_1x1x1_0.03.vasp	-3.77939	-3.72038	0.059013	VASP_strain_mp-1183161_1x1x1_0.03.vasp	-3.77939	-3.67688	0.102508
VASP_strain_mp-1220274_1x1x1_-0.01.vasp	-5.26881	-5.29614	0.027328	VASP_strain_mp-1220274_1x1x1_-0.01.vasp	-5.26881	-5.26763	0.00118184
VASP_strain_mp-1187436_1x1x1_-0.02.vasp	-8.1998	-8.24851	0.0487121	VASP_strain_mp-1187436_1x1x1_-0.02.vasp	-8.1998	-8.2556	0.0558004
VASP_strain_mp-1185862_1x1x1_-0.01.vasp	-3.78909	-3.79528	0.00619246	VASP_strain_mp-1185862_1x1x1_-0.01.vasp	-3.78909	-3.79324	0.00414955
VASP_strain_mp-1095978_1x1x1_0.03.vasp	-2.99096	-2.97985	0.0111128	VASP_strain_mp-1095978_1x1x1_0.03.vasp	-2.99096	-2.96662	0.0243432
VASP_strain_mp-1018017_1x1x1_0.04.vasp	-6.42652	-6.49136	0.0648391	VASP_strain_mp-1018017_1x1x1_0.04.vasp	-6.42652	-6.37614	0.0503818
VASP_strain_mp-1625_1x1x1_0.02.vasp	-3.86978	-3.86513	0.00464639	VASP_strain_mp-1625_1x1x1_0.02.vasp	-3.86978	-3.82443	0.0453537
VASP_strain_mp-1223841_1x1x1_0.01.vasp	-3.37423	-3.36106	0.0131782	VASP_strain_mp-1223841_1x1x1_0.01.vasp	-3.37423	-3.40498	0.0307509
VASP_strain_mp-977535_1x1x1_0.05.vasp	-3.7431	-3.70886	0.034238	VASP_strain_mp-977535_1x1x1_0.05.vasp	-3.7431	-3.66563	0.0774753
VASP_strain_mp-1186955_1x1x1_-0.03.vasp	-6.47112	-6.53832	0.0671986	VASP_strain_mp-1186955_1x1x1_-0.03.vasp	-6.47112	-6.56706	0.0959393
VASP_strain_mp-867862_1x1x1_-0.01.vasp	-3.19343	-3.20623	0.0128038	VASP_strain_mp-867862_1x1x1_-0.01.vasp	-3.19343	-3.20666	0.0132287
VASP_strain_mp-142_1x1x1_0.05.vasp	-2.89701	-2.8603	0.0367071	VASP_strain_mp-142_1x1x1_0.05.vasp	-2.89701	-2.8402	0.0568084
VASP_strain_mp-11419_1x1x1_0.01.vasp	-5.05356	-5.07982	0.0262547	VASP_strain_mp-11419_1x1x1_0.01.vasp	-5.05356	-4.96707	0.0864907
VASP_strain_mp-9166_1x1x1_-0.04.vasp	-7.45644	-7.74704	0.290597	VASP_strain_mp-9166_1x1x1_-0.04.vasp	-7.45644	-7.40232	0.0541262
VASP_strain_mp-999454_1x1x1_-0.01.vasp	-5.65508	-5.65114	0.00394814	VASP_strain_mp-999454_1x1x1_-0.01.vasp	-5.65508	-5.70708	0.0519909
VASP_strain_mp-863714_1x1x1_0.05.vasp	-5.98374	-5.9154	0.0683383	VASP_strain_mp-863714_1x1x1_0.05.vasp	-5.98374	-5.8947	0.0890417
VASP_strain_mp-1184772_1x1x1_-0.02.vasp	-8.34812	-8.38067	0.0325539	VASP_strain_mp-1184772_1x1x1_-0.02.vasp	-8.34812	-8.39487	0.046749
VASP_strain_mp-1183307_1x1x1_0.03.vasp	-4.38137	-4.42283	0.0414577	VASP_strain_mp-1183307_1x1x1_0.03.vasp	-4.38137	-4.40741	0.0260373
VASP_strain_mp-31337_1x1x1_0.03.vasp	-4.97256	-4.91175	0.0608098	VASP_strain_mp-31337_1x1x1_0.03.vasp	-4.97256	-4.95937	0.0131912
VASP_strain_mp-983362_1x1x1_-0.05.vasp	-9.96755	-10.1565	0.188981	VASP_strain_mp-983362_1x1x1_-0.05.vasp	-9.96755	-10.0577	0.0901908
VASP_strain_mp-1001843_1x1x1_0.01.vasp	-6.01569	-5.98541	0.0302808	VASP_strain_mp-1001843_1x1x1_0.01.vasp	-6.01569	-5.94098	0.0747057
VASP_strain_mp-34240_1x1x1_0.04.vasp	-2.64733	-2.63159	0.0157424	VASP_strain_mp-34240_1x1x1_0.04.vasp	-2.64733	-2.5854	0.0619275
VASP_strain_mp-1065668_1x1x1_0.02.vasp	-7.4582	-7.39756	0.0606451	VASP_strain_mp-1065668_1x1x1_0.02.vasp	-7.4582	-7.41021	0.0479877
VASP_strain_mp-1184893_1x1x1_0.03.vasp	-1.09473	-0.977268	0.117464	VASP_strain_mp-1184893_1x1x1_0.03.vasp	-1.09473	-0.966895	0.127837
VASP_strain_mp-622980_1x1x1_-0.04.vasp	-5.77288	-5.8343	0.0614156	VASP_strain_mp-622980_1x1x1_-0.04.vasp	-5.77288	-5.86537	0.0924818
VASP_strain_mp-12753_1x1x1_0.03.vasp	-4.55839	-4.53653	0.0218654	VASP_strain_mp-12753_1x1x1_0.03.vasp	-4.55839	-4.50791	0.0504859
VASP_strain_mp-961720_1x1x1_0.05.vasp	-7.17106	-7.03143	0.139627	VASP_strain_mp-961720_1x1x1_0.05.vasp	-7.17106	-7.08809	0.0829671
VASP_strain_mp-1185983_1x1x1_-0.03.vasp	-8.92265	-9.07804	0.155384	VASP_strain_mp-1185983_1x1x1_-0.03.vasp	-8.92265	-9.12878	0.206129
VASP_strain_mp-975461_1x1x1_-0.02.vasp	-1.01554	-1.06714	0.0515999	VASP_strain_mp-975461_1x1x1_-0.02.vasp	-1.01554	-1.12559	0.110049
VASP_strain_mp-6986_1x1x1_0.03.vasp	-11.5647	-11.461	0.103717	VASP_strain_mp-6986_1x1x1_0.03.vasp	-11.5647	-11.5049	0.059854
VASP_strain_mp-19091_1x1x1_0.03.vasp	-8.31285	-8.2795	0.0333514	VASP_strain_mp-19091_1x1x1_0.03.vasp	-8.31285	-8.31557	0.00271592
VASP_strain_mp-1215236_1x1x1_0.04.vasp	-8.0638	-8.05379	0.01001	VASP_strain_mp-1215236_1x1x1_0.04.vasp	-8.0638	-8.04253	0.0212713
VASP_strain_mp-865149_1x1x1_-0.01.vasp	-8.45413	-8.49649	0.0423539	VASP_strain_mp-865149_1x1x1_-0.01.vasp	-8.45413	-8.45832	0.00418541
VASP_strain_mp-1097441_1x1x1_0.03.vasp	-0.339576	-0.323031	0.0165449	VASP_strain_mp-1097441_1x1x1_0.03.vasp	-0.339576	-0.364614	0.0250383
VASP_strain_mp-976412_1x1x1_0.04.vasp	-1.81211	-1.81271	0.00060806	VASP_strain_mp-976412_1x1x1_0.04.vasp	-1.81211	-1.84685	0.0347427
VASP_strain_mp-1186538_1x1x1_0.01.vasp	-4.23859	-4.22397	0.0146258	VASP_strain_mp-1186538_1x1x1_0.01.vasp	-4.23859	-4.18548	0.053115
VASP_strain_mp-864831_1x1x1_0.05.vasp	-6.84731	-6.78304	0.0642678	VASP_strain_mp-864831_1x1x1_0.05.vasp	-6.84731	-6.75659	0.090718
VASP_strain_mp-1245506_1x1x1_-0.01.vasp	-4.71622	-4.75874	0.0425207	VASP_strain_mp-1245506_1x1x1_-0.01.vasp	-4.71622	-4.77582	0.0595991
VASP_strain_mp-567589_1x1x1_-0.03.vasp	-4.3567	-4.4272	0.0704927	VASP_strain_mp-567589_1x1x1_-0.03.vasp	-4.3567	-4.42168	0.0649754
VASP_strain_mp-1018099_1x1x1_-0.05.vasp	-4.77902	-4.89831	0.119291	VASP_strain_mp-1018099_1x1x1_-0.05.vasp	-4.77902	-4.86598	0.0869607
VASP_strain_mp-1095918_1x1x1_-0.02.vasp	-2.37724	-2.39938	0.0221453	VASP_strain_mp-1095918_1x1x1_-0.02.vasp	-2.37724	-2.42343	0.0461872
VASP_strain_mp-1215256_1x1x1_0.04.vasp	-10.1247	-10.0968	0.0278679	VASP_strain_mp-1215256_1x1x1_0.04.vasp	-10.1247	-10.09	0.0346793
VASP_strain_mp-4828_1x1x1_-0.05.vasp	-6.63784	-6.79285	0.155003	VASP_strain_mp-4828_1x1x1_-0.05.vasp	-6.63784	-6.8262	0.188362
VASP_strain_mp-22691_1x1x1_0.04.vasp	-3.54462	-3.44781	0.0968124	VASP_strain_mp-22691_1x1x1_0.04.vasp	-3.54462	-3.52892	0.015703
VASP_strain_mp-1095725_1x1x1_-0.03.vasp	-1.2894	-1.35557	0.0661701	VASP_strain_mp-1095725_1x1x1_-0.03.vasp	-1.2894	-1.45316	0.163756
VASP_strain_mp-1097222_1x1x1_0.04.vasp	-1.57208	-1.57168	0.000394325	VASP_strain_mp-1097222_1x1x1_0.04.vasp	-1.57208	-1.59022	0.0181466
VASP_strain_mp-1093539_1x1x1_-0.01.vasp	-0.721358	-0.725323	0.00396484	VASP_strain_mp-1093539_1x1x1_-0.01.vasp	-0.721358	-0.721395	3.75182e-05
VASP_strain_mp-1096058_1x1x1_0.04.vasp	-0.758779	-0.716102	0.0426768	VASP_strain_mp-1096058_1x1x1_0.04.vasp	-0.758779	-0.751326	0.00745317
VASP_strain_mp-10224_1x1x1_0.04.vasp	-5.65348	-5.60844	0.0450332	VASP_strain_mp-10224_1x1x1_0.04.vasp	-5.65348	-5.64829	0.00519162
VASP_strain_mp-1184849_1x1x1_0.02.vasp	-1.01821	-1.01203	0.00617679	VASP_strain_mp-1184849_1x1x1_0.02.vasp	-1.01821	-1.02207	0.00385804
VASP_strain_mp-1184895_1x1x1_0.04.vasp	-1.32588	-1.35454	0.0286609	VASP_strain_mp-1184895_1x1x1_0.04.vasp	-1.32588	-1.32523	0.000648009
VASP_strain_mp-1410_1x1x1_-0.03.vasp	-8.12996	-8.20608	0.0761135	VASP_strain_mp-1410_1x1x1_-0.03.vasp	-8.12996	-8.1721	0.0421311
VASP_strain_mp-1222851_1x1x1_0.03.vasp	-7.96341	-7.89314	0.0702765	VASP_strain_mp-1222851_1x1x1_0.03.vasp	-7.96341	-7.91797	0.0454404
VASP_strain_mp-974364_1x1x1_-0.03.vasp	-4.34815	-4.45874	0.110597	VASP_strain_mp-974364_1x1x1_-0.03.vasp	-4.34815	-4.39024	0.0420963
VASP_strain_mp-1095722_1x1x1_0.02.vasp	-4.06841	-4.03771	0.0307034	VASP_strain_mp-1095722_1x1x1_0.02.vasp	-4.06841	-4.0644	0.00401287
VASP_strain_mp-30392_1x1x1_-0.01.vasp	-2.87934	-2.86896	0.0103819	VASP_strain_mp-30392_1x1x1_-0.01.vasp	-2.87934	-2.87139	0.00795037
VASP_strain_mp-1186203_1x1x1_0.05.vasp	-10.351	-10.1984	0.152515	VASP_strain_mp-1186203_1x1x1_0.05.vasp	-10.351	-10.11	0.240936
VASP_strain_mp-1183514_1x1x1_-0.01.vasp	-2.92984	-2.94552	0.0156852	VASP_strain_mp-1183514_1x1x1_-0.01.vasp	-2.92984	-2.89857	0.0312672
VASP_strain_mp-863676_1x1x1_-0.01.vasp	-4.66892	-4.67022	0.00129775	VASP_strain_mp-863676_1x1x1_-0.01.vasp	-4.66892	-4.6604	0.00852333
VASP_strain_mp-865573_1x1x1_0.05.vasp	-2.83198	-2.83842	0.00644182	VASP_strain_mp-865573_1x1x1_0.05.vasp	-2.83198	-2.83294	0.000967177
VASP_strain_mp-1096124_1x1x1_0.02.vasp	-0.89005	-0.895159	0.00510897	VASP_strain_mp-1096124_1x1x1_0.02.vasp	-0.89005	-0.951063	0.0610132
VASP_strain_mp-1001780_1x1x1_-0.02.vasp	-5.47985	-5.47112	0.00873123	VASP_strain_mp-1001780_1x1x1_-0.02.vasp	-5.47985	-5.50258	0.0227294
VASP_strain_mp-550893_1x1x1_0.01.vasp	-10.0812	-10.122	0.0408278	VASP_strain_mp-550893_1x1x1_0.01.vasp	-10.0812	-10.0648	0.0163815
VASP_strain_mp-1283971_1x1x1_-0.02.vasp	-6.539	-6.42493	0.114077	VASP_strain_mp-1283971_1x1x1_-0.02.vasp	-6.539	-6.2772	0.261802
VASP_strain_mp-1096758_1x1x1_0.03.vasp	-2.83889	-2.8698	0.0309085	VASP_strain_mp-1096758_1x1x1_0.03.vasp	-2.83889	-2.76989	0.0690026
VASP_strain_mp-865460_1x1x1_-0.04.vasp	-3.51492	-3.52292	0.00799407	VASP_strain_mp-865460_1x1x1_-0.04.vasp	-3.51492	-3.52355	0.00862638
VASP_strain_mp-1018146_1x1x1_0.01.vasp	-7.85239	-7.81971	0.0326777	VASP_strain_mp-1018146_1x1x1_0.01.vasp	-7.85239	-7.81518	0.0372104
VASP_strain_mp-1097243_1x1x1_-0.01.vasp	-0.281209	-0.326961	0.0457515	VASP_strain_mp-1097243_1x1x1_-0.01.vasp	-0.281209	-0.355922	0.0747131
VASP_strain_mp-973936_1x1x1_0.04.vasp	-3.36118	-3.43603	0.0748436	VASP_strain_mp-973936_1x1x1_0.04.vasp	-3.36118	-3.27899	0.0821983
VASP_strain_mp-1096036_1x1x1_0.04.vasp	-1.99999	-2.02335	0.0233516	VASP_strain_mp-1096036_1x1x1_0.04.vasp	-1.99999	-2.03879	0.0387914
VASP_strain_mp-1040452_1x1x1_0.02.vasp	-5.64998	-5.66776	0.017783	VASP_strain_mp-1040452_1x1x1_0.02.vasp	-5.64998	-5.70489	0.054914
VASP_strain_mp-1093545_1x1x1_0.02.vasp	-2.32994	-2.34453	0.0145919	VASP_strain_mp-1093545_1x1x1_0.02.vasp	-2.32994	-2.29108	0.038859
VASP_strain_mp-510402_1x1x1_-0.04.vasp	-6.36561	-6.40126	0.0356494	VASP_strain_mp-510402_1x1x1_-0.04.vasp	-6.36561	-6.39735	0.0317355
VASP_strain_mp-11290_1x1x1_-0.01.vasp	-3.74885	-3.7738	0.0249523	VASP_strain_mp-11290_1x1x1_-0.01.vasp	-3.74885	-3.78488	0.0360279
VASP_strain_mp-7991_1x1x1_0.02.vasp	-8.7889	-8.73587	0.053025	VASP_strain_mp-7991_1x1x1_0.02.vasp	-8.7889	-8.56146	0.227437
VASP_strain_mp-1185519_1x1x1_-0.01.vasp	-7.94781	-7.98349	0.0356866	VASP_strain_mp-1185519_1x1x1_-0.01.vasp	-7.94781	-7.97968	0.031868
VASP_strain_mp-1187030_1x1x1_0.01.vasp	-3.84056	-3.86074	0.0201879	VASP_strain_mp-1187030_1x1x1_0.01.vasp	-3.84056	-3.81295	0.0276043
VASP_strain_mp-975511_1x1x1_0.05.vasp	-3.55378	-3.50708	0.0466991	VASP_strain_mp-975511_1x1x1_0.05.vasp	-3.55378	-3.52695	0.0268308
VASP_strain_mp-755552_1x1x1_0.02.vasp	-5.93867	-5.92042	0.0182558	VASP_strain_mp-755552_1x1x1_0.02.vasp	-5.93867	-5.87529	0.0633873
VASP_strain_mp-20560_1x1x1_0.02.vasp	-6.74777	-6.76858	0.0208086	VASP_strain_mp-20560_1x1x1_0.02.vasp	-6.74777	-6.79226	0.0444897
VASP_strain_mp-1187926_1x1x1_-0.03.vasp	-3.85985	-3.90944	0.0495896	VASP_strain_mp-1187926_1x1x1_-0.03.vasp	-3.85985	-3.92331	0.0634605
VASP_strain_mp-961672_1x1x1_0.05.vasp	-2.38158	-2.41026	0.0286746	VASP_strain_mp-961672_1x1x1_0.05.vasp	-2.38158	-2.35591	0.0256745
VASP_strain_mp-1184083_1x1x1_0.04.vasp	-3.53264	-3.51504	0.0175982	VASP_strain_mp-1184083_1x1x1_0.04.vasp	-3.53264	-3.47332	0.0593235
VASP_strain_mp-1221538_1x1x1_0.01.vasp	-7.52649	-7.41472	0.111767	VASP_strain_mp-1221538_1x1x1_0.01.vasp	-7.52649	-7.45711	0.0693808
VASP_strain_mp-862976_1x1x1_0.05.vasp	-2.97157	-2.9161	0.0554774	VASP_strain_mp-862976_1x1x1_0.05.vasp	-2.97157	-2.8946	0.0769743
VASP_strain_mp-1183860_1x1x1_-0.01.vasp	-3.1456	-3.1764	0.0307992	VASP_strain_mp-1183860_1x1x1_-0.01.vasp	-3.1456	-3.17803	0.0324325
VASP_strain_mp-865359_1x1x1_-0.03.vasp	-3.53527	-3.57913	0.0438626	VASP_strain_mp-865359_1x1x1_-0.03.vasp	-3.53527	-3.57281	0.0375462
VASP_strain_mp-1206755_1x1x1_-0.01.vasp	-4.33343	-4.32825	0.00517801	VASP_strain_mp-1206755_1x1x1_-0.01.vasp	-4.33343	-4.31559	0.0178456
VASP_strain_mp-1093931_1x1x1_-0.05.vasp	-0.77922	-0.790524	0.0113044	VASP_strain_mp-1093931_1x1x1_-0.05.vasp	-0.77922	-0.808073	0.028853
VASP_strain_mp-2620_1x1x1_-0.02.vasp	-5.8104	-5.84378	0.0333819	VASP_strain_mp-2620_1x1x1_-0.02.vasp	-5.8104	-5.85291	0.0425099
VASP_strain_mp-1153_1x1x1_-0.04.vasp	-3.99146	-3.99451	0.00304584	VASP_strain_mp-1153_1x1x1_-0.04.vasp	-3.99146	-3.87888	0.112583
VASP_strain_mp-560676_1x1x1_0.03.vasp	-5.47557	-5.46384	0.0117356	VASP_strain_mp-560676_1x1x1_0.03.vasp	-5.47557	-5.48377	0.00820189
VASP_strain_mp-1187869_1x1x1_-0.01.vasp	-4.09159	-4.10873	0.0171426	VASP_strain_mp-1187869_1x1x1_-0.01.vasp	-4.09159	-4.10922	0.0176271
VASP_strain_mp-1215445_1x1x1_-0.01.vasp	-3.55067	-3.55827	0.00760775	VASP_strain_mp-1215445_1x1x1_-0.01.vasp	-3.55067	-3.51624	0.0344296
VASP_strain_mp-19868_1x1x1_0.01.vasp	-7.16902	-7.15646	0.0125566	VASP_strain_mp-19868_1x1x1_0.01.vasp	-7.16902	-7.12552	0.0434942
VASP_strain_mp-865140_1x1x1_0.05.vasp	-7.76591	-7.64716	0.118752	VASP_strain_mp-865140_1x1x1_0.05.vasp	-7.76591	-7.61875	0.147154
VASP_strain_mp-1096256_1x1x1_0.05.vasp	-4.53364	-4.46867	0.0649641	VASP_strain_mp-1096256_1x1x1_0.05.vasp	-4.53364	-4.51632	0.01732
VASP_strain_mp-1229031_1x1x1_0.04.vasp	-4.11815	-4.09788	0.02027	VASP_strain_mp-1229031_1x1x1_0.04.vasp	-4.11815	-4.07908	0.0390681
VASP_strain_mp-861937_1x1x1_-0.03.vasp	-3.86493	-3.91753	0.0526011	VASP_strain_mp-861937_1x1x1_-0.03.vasp	-3.86493	-3.97165	0.106723
VASP_strain_mp-1186132_1x1x1_-0.02.vasp	-1.70884	-1.72965	0.0208134	VASP_strain_mp-1186132_1x1x1_-0.02.vasp	-1.70884	-1.68173	0.0271061
VASP_strain_mp-864948_1x1x1_0.02.vasp	-6.48228	-6.47173	0.0105577	VASP_strain_mp-864948_1x1x1_0.02.vasp	-6.48228	-6.52624	0.0439531
VASP_strain_mp-866142_1x1x1_-0.03.vasp	-7.75644	-7.95582	0.199375	VASP_strain_mp-866142_1x1x1_-0.03.vasp	-7.75644	-7.86869	0.112246
VASP_strain_mp-1187204_1x1x1_0.03.vasp	-10.6034	-10.4869	0.11651	VASP_strain_mp-1187204_1x1x1_0.03.vasp	-10.6034	-10.4993	0.104068
VASP_strain_mp-866150_1x1x1_0.02.vasp	-5.74831	-5.70734	0.0409704	VASP_strain_mp-866150_1x1x1_0.02.vasp	-5.74831	-5.63854	0.109766
VASP_strain_mp-1186034_1x1x1_-0.05.vasp	-1.65337	-1.67396	0.0205864	VASP_strain_mp-1186034_1x1x1_-0.05.vasp	-1.65337	-1.6834	0.0300251
VASP_strain_mp-631280_1x1x1_0.04.vasp	-9.52924	-9.49764	0.0315986	VASP_strain_mp-631280_1x1x1_0.04.vasp	-9.52924	-9.39975	0.129492
VASP_strain_mp-984720_1x1x1_-0.01.vasp	-3.38809	-3.39447	0.00638083	VASP_strain_mp-984720_1x1x1_-0.01.vasp	-3.38809	-3.42251	0.0344216
VASP_strain_mp-999072_1x1x1_-0.02.vasp	-5.12083	-5.26612	0.145295	VASP_strain_mp-999072_1x1x1_-0.02.vasp	-5.12083	-5.26248	0.141652
VASP_strain_mp-1096373_1x1x1_0.02.vasp	-1.53659	-1.47852	0.0580653	VASP_strain_mp-1096373_1x1x1_0.02.vasp	-1.53659	-1.48908	0.0475036
VASP_strain_mp-1185362_1x1x1_-0.04.vasp	-3.67146	-3.70724	0.0357805	VASP_strain_mp-1185362_1x1x1_-0.04.vasp	-3.67146	-3.7147	0.0432328
VASP_strain_mp-1097073_1x1x1_-0.03.vasp	-2.81887	-2.81896	9.01406e-05	VASP_strain_mp-1097073_1x1x1_-0.03.vasp	-2.81887	-2.86336	0.0444885
VASP_strain_mp-1227262_1x1x1_0.01.vasp	-4.47917	-4.48766	0.00849171	VASP_strain_mp-1227262_1x1x1_0.01.vasp	-4.47917	-4.49511	0.0159436
VASP_strain_mp-862822_1x1x1_-0.02.vasp	-6.534	-6.58957	0.055569	VASP_strain_mp-862822_1x1x1_-0.02.vasp	-6.534	-6.58293	0.048929
VASP_strain_mp-1038972_1x1x1_0.02.vasp	-1.18235	-1.1808	0.00154637	VASP_strain_mp-1038972_1x1x1_0.02.vasp	-1.18235	-1.17665	0.00570104
VASP_strain_mp-1001834_1x1x1_-0.05.vasp	-9.83174	-10.1004	0.268624	VASP_strain_mp-1001834_1x1x1_-0.05.vasp	-9.83174	-9.96371	0.13197
VASP_strain_mp-675902_1x1x1_0.02.vasp	-5.52131	-5.50311	0.0182078	VASP_strain_mp-675902_1x1x1_0.02.vasp	-5.52131	-5.45694	0.0643744
VASP_strain_mp-977543_1x1x1_0.03.vasp	-7.10995	-7.03701	0.0729385	VASP_strain_mp-977543_1x1x1_0.03.vasp	-7.10995	-7.0073	0.102649
VASP_strain_mp-570637_1x1x1_-0.04.vasp	-9.92786	-10.0887	0.160808	VASP_strain_mp-570637_1x1x1_-0.04.vasp	-9.92786	-9.94574	0.0178814
VASP_strain_mp-567456_1x1x1_0.04.vasp	-4.12216	-3.90586	0.216305	VASP_strain_mp-567456_1x1x1_0.04.vasp	-4.12216	-3.91943	0.20273
VASP_strain_mp-999307_1x1x1_-0.04.vasp	-9.11672	-9.27517	0.158454	VASP_strain_mp-999307_1x1x1_-0.04.vasp	-9.11672	-9.0983	0.0184159
VASP_strain_mp-1186424_1x1x1_-0.01.vasp	-4.32912	-4.35712	0.0280027	VASP_strain_mp-1186424_1x1x1_-0.01.vasp	-4.32912	-4.38539	0.0562717
VASP_strain_mp-866115_1x1x1_-0.05.vasp	-5.61314	-5.78038	0.167244	VASP_strain_mp-866115_1x1x1_-0.05.vasp	-5.61314	-5.73655	0.123411
VASP_strain_mp-133_1x1x1_0.02.vasp	-4.10003	-4.11126	0.0112328	VASP_strain_mp-133_1x1x1_0.02.vasp	-4.10003	-4.09684	0.00318245
VASP_strain_mp-865176_1x1x1_-0.05.vasp	-5.34662	-5.49515	0.148525	VASP_strain_mp-865176_1x1x1_-0.05.vasp	-5.34662	-5.48539	0.138765
VASP_strain_mp-1183075_1x1x1_0.01.vasp	-4.55967	-4.54556	0.0141018	VASP_strain_mp-1183075_1x1x1_0.01.vasp	-4.55967	-4.56024	0.000569366
VASP_strain_mp-861991_1x1x1_0.02.vasp	-7.91665	-7.87985	0.036798	VASP_strain_mp-861991_1x1x1_0.02.vasp	-7.91665	-7.80975	0.106897
VASP_strain_mp-1183401_1x1x1_-0.02.vasp	-7.95306	-7.99424	0.0411819	VASP_strain_mp-1183401_1x1x1_-0.02.vasp	-7.95306	-8.01917	0.066111
VASP_strain_mp-1093736_1x1x1_-0.02.vasp	-0.246935	-0.224352	0.0225833	VASP_strain_mp-1093736_1x1x1_-0.02.vasp	-0.246935	-0.221726	0.0252086
VASP_strain_mp-867255_1x1x1_-0.03.vasp	-2.19676	-2.25994	0.0631785	VASP_strain_mp-867255_1x1x1_-0.03.vasp	-2.19676	-2.2142	0.0174426
VASP_strain_mp-19850_1x1x1_0.05.vasp	-7.09571	-6.99571	0.100003	VASP_strain_mp-19850_1x1x1_0.05.vasp	-7.09571	-6.91751	0.178203
VASP_strain_mp-1094232_1x1x1_-0.02.vasp	-2.56528	-2.58713	0.0218525	VASP_strain_mp-1094232_1x1x1_-0.02.vasp	-2.56528	-2.56992	0.00463941
VASP_strain_mp-1095749_1x1x1_-0.03.vasp	-3.59381	-3.60707	0.0132641	VASP_strain_mp-1095749_1x1x1_-0.03.vasp	-3.59381	-3.60994	0.0161351
VASP_strain_mp-12574_1x1x1_0.05.vasp	-6.36104	-6.25908	0.10196	VASP_strain_mp-12574_1x1x1_0.05.vasp	-6.36104	-6.21534	0.145706
VASP_strain_mp-8638_1x1x1_-0.05.vasp	-10.2192	-10.3094	0.0901745	VASP_strain_mp-8638_1x1x1_-0.05.vasp	-10.2192	-10.4175	0.198275
VASP_strain_mp-999120_1x1x1_-0.03.vasp	-8.74011	-8.86145	0.121331	VASP_strain_mp-999120_1x1x1_-0.03.vasp	-8.74011	-8.7644	0.0242855
VASP_strain_mp-1097260_1x1x1_-0.05.vasp	-4.6894	-4.81509	0.125687	VASP_strain_mp-1097260_1x1x1_-0.05.vasp	-4.6894	-4.76807	0.0786736
VASP_strain_mp-1067880_1x1x1_0.03.vasp	-2.89713	-2.88103	0.0161005	VASP_strain_mp-1067880_1x1x1_0.03.vasp	-2.89713	-2.87258	0.0245552
VASP_strain_mp-1096338_1x1x1_-0.02.vasp	-0.496127	-0.50838	0.0122536	VASP_strain_mp-1096338_1x1x1_-0.02.vasp	-0.496127	-0.549013	0.0528859
VASP_strain_mp-1187679_1x1x1_0.04.vasp	-5.72027	-5.66063	0.0596419	VASP_strain_mp-1187679_1x1x1_0.04.vasp	-5.72027	-5.66822	0.0520502
VASP_strain_mp-1017544_1x1x1_-0.01.vasp	-9.20372	-9.23858	0.0348615	VASP_strain_mp-1017544_1x1x1_-0.01.vasp	-9.20372	-9.16513	0.038581
VASP_strain_mp-1225499_1x1x1_0.02.vasp	-5.07557	-5.02195	0.0536181	VASP_strain_mp-1225499_1x1x1_0.02.vasp	-5.07557	-5.08433	0.00875693
VASP_strain_mp-752735_1x1x1_-0.02.vasp	-5.10212	-5.16716	0.0650384	VASP_strain_mp-752735_1x1x1_-0.02.vasp	-5.10212	-5.13719	0.0350757
VASP_strain_mp-862424_1x1x1_-0.02.vasp	-7.38738	-7.44934	0.0619565	VASP_strain_mp-862424_1x1x1_-0.02.vasp	-7.38738	-7.4893	0.101917
VASP_strain_mp-6933_1x1x1_-0.05.vasp	-8.84363	-8.91724	0.073602	VASP_strain_mp-6933_1x1x1_-0.05.vasp	-8.84363	-8.86356	0.0199299
VASP_strain_mp-865529_1x1x1_-0.03.vasp	-8.11914	-8.19928	0.0801464	VASP_strain_mp-865529_1x1x1_-0.03.vasp	-8.11914	-8.25546	0.13632
VASP_strain_mp-1183187_1x1x1_0.01.vasp	-6.40141	-6.38471	0.0167049	VASP_strain_mp-1183187_1x1x1_0.01.vasp	-6.40141	-6.37144	0.0299729
VASP_strain_mp-1097416_1x1x1_-0.05.vasp	-3.8197	-3.9206	0.100903	VASP_strain_mp-1097416_1x1x1_-0.05.vasp	-3.8197	-3.87664	0.0569439
VASP_strain_mp-1187243_1x1x1_-0.02.vasp	-11.5094	-11.5744	0.0649476	VASP_strain_mp-1187243_1x1x1_-0.02.vasp	-11.5094	-11.5138	0.00436089
VASP_strain_mp-1185177_1x1x1_-0.01.vasp	-1.70191	-1.66294	0.0389774	VASP_strain_mp-1185177_1x1x1_-0.01.vasp	-1.70191	-1.68212	0.0197969
VASP_strain_mp-867122_1x1x1_0.01.vasp	-4.58149	-4.56797	0.0135191	VASP_strain_mp-867122_1x1x1_0.01.vasp	-4.58149	-4.54907	0.0324202
VASP_strain_mp-1186770_1x1x1_-0.02.vasp	-2.86668	-2.89962	0.0329371	VASP_strain_mp-1186770_1x1x1_-0.02.vasp	-2.86668	-2.94657	0.0798836
VASP_strain_mp-7132_1x1x1_0.02.vasp	-5.2936	-5.23296	0.0606395	VASP_strain_mp-7132_1x1x1_0.02.vasp	-5.2936	-5.29787	0.00426807
VASP_strain_mp-30479_1x1x1_0.03.vasp	-2.7129	-2.72048	0.0075809	VASP_strain_mp-30479_1x1x1_0.03.vasp	-2.7129	-2.65245	0.0604497
VASP_strain_mp-1184819_1x1x1_0.02.vasp	-4.4479	-4.42677	0.0211343	VASP_strain_mp-1184819_1x1x1_0.02.vasp	-4.4479	-4.45484	0.00694074
VASP_strain_mp-1094136_1x1x1_0.05.vasp	-4.73207	-4.69436	0.0377168	VASP_strain_mp-1094136_1x1x1_0.05.vasp	-4.73207	-4.613	0.119077
VASP_strain_mp-866209_1x1x1_-0.04.vasp	-5.43398	-5.49248	0.0585062	VASP_strain_mp-866209_1x1x1_-0.04.vasp	-5.43398	-5.5009	0.066927
VASP_strain_mp-1217706_1x1x1_0.03.vasp	-4.97876	-4.9411	0.0376673	VASP_strain_mp-1217706_1x1x1_0.03.vasp	-4.97876	-4.90537	0.0733948
VASP_strain_mp-1184572_1x1x1_-0.02.vasp	-6.89806	-6.9138	0.0157427	VASP_strain_mp-1184572_1x1x1_-0.02.vasp	-6.89806	-6.92578	0.0277194
VASP_strain_mp-1096231_1x1x1_-0.01.vasp	-1.03587	-0.96087	0.0749987	VASP_strain_mp-1096231_1x1x1_-0.01.vasp	-1.03587	-0.976277	0.059592
VASP_strain_mp-23245_1x1x1_-0.05.vasp	-4.99323	-5.01765	0.0244268	VASP_strain_mp-23245_1x1x1_-0.05.vasp	-4.99323	-5.10431	0.111087
VASP_strain_mp-863659_1x1x1_-0.02.vasp	-2.54052	-2.53673	0.00379001	VASP_strain_mp-863659_1x1x1_-0.02.vasp	-2.54052	-2.59094	0.0504183
VASP_strain_mp-1186673_1x1x1_0.01.vasp	-3.01369	-3.03095	0.01726	VASP_strain_mp-1186673_1x1x1_0.01.vasp	-3.01369	-3.02238	0.00869793
VASP_strain_mp-13141_1x1x1_-0.04.vasp	-1.41158	-1.4257	0.0141252	VASP_strain_mp-13141_1x1x1_-0.04.vasp	-1.41158	-1.52408	0.112501
VASP_strain_mp-867807_1x1x1_0.03.vasp	-3.51917	-3.49629	0.0228825	VASP_strain_mp-867807_1x1x1_0.03.vasp	-3.51917	-3.44332	0.0758452
VASP_strain_mp-1186348_1x1x1_-0.02.vasp	-4.61342	-4.60442	0.00899324	VASP_strain_mp-1186348_1x1x1_-0.02.vasp	-4.61342	-4.59859	0.0148242
VASP_strain_mp-1065741_1x1x1_-0.01.vasp	-8.68279	-8.67239	0.0103941	VASP_strain_mp-1065741_1x1x1_-0.01.vasp	-8.68279	-8.70693	0.0241439
VASP_strain_mp-31455_1x1x1_0.03.vasp	-7.65272	-7.55768	0.0950476	VASP_strain_mp-31455_1x1x1_0.03.vasp	-7.65272	-7.53134	0.12138
VASP_strain_mp-1094784_1x1x1_-0.05.vasp	-1.44947	-1.47216	0.0226974	VASP_strain_mp-1094784_1x1x1_-0.05.vasp	-1.44947	-1.50244	0.0529736
VASP_strain_mp-1008492_1x1x1_0.05.vasp	-1.79008	-1.75035	0.039725	VASP_strain_mp-1008492_1x1x1_0.05.vasp	-1.79008	-1.78051	0.0095654
VASP_strain_mp-20122_1x1x1_0.03.vasp	-5.38881	-5.33078	0.0580234	VASP_strain_mp-20122_1x1x1_0.03.vasp	-5.38881	-5.34026	0.048542
VASP_strain_mp-72_1x1x1_-0.02.vasp	-7.80355	-7.8417	0.0381478	VASP_strain_mp-72_1x1x1_-0.02.vasp	-7.80355	-7.85193	0.0483768
VASP_strain_mp-961675_1x1x1_-0.05.vasp	-6.70872	-6.92106	0.212337	VASP_strain_mp-961675_1x1x1_-0.05.vasp	-6.70872	-6.77365	0.0649298
VASP_strain_mp-30789_1x1x1_0.01.vasp	-10.997	-10.7446	0.252437	VASP_strain_mp-30789_1x1x1_0.01.vasp	-10.997	-10.8174	0.17959
VASP_strain_mp-1011031_1x1x1_-0.05.vasp	-5.02742	-5.21203	0.184614	VASP_strain_mp-1011031_1x1x1_-0.05.vasp	-5.02742	-5.18643	0.159009
VASP_strain_mp-1215529_1x1x1_0.01.vasp	-3.10194	-3.09985	0.00208691	VASP_strain_mp-1215529_1x1x1_0.01.vasp	-3.10194	-3.08089	0.0210502
VASP_strain_mp-1097616_1x1x1_0.02.vasp	-6.53187	-6.5907	0.0588291	VASP_strain_mp-1097616_1x1x1_0.02.vasp	-6.53187	-6.50389	0.0279769
VASP_strain_mp-1018154_1x1x1_0.01.vasp	-6.79961	-6.77354	0.0260723	VASP_strain_mp-1018154_1x1x1_0.01.vasp	-6.79961	-6.7735	0.0261067
VASP_strain_mp-1180047_1x1x1_-0.05.vasp	-5.51249	-5.58862	0.076136	VASP_strain_mp-1180047_1x1x1_-0.05.vasp	-5.51249	-5.52085	0.00835916
VASP_strain_mp-1925_1x1x1_-0.01.vasp	-7.70941	-7.82289	0.113473	VASP_strain_mp-1925_1x1x1_-0.01.vasp	-7.70941	-7.73594	0.0265232
VASP_strain_mp-861892_1x1x1_0.02.vasp	-6.13424	-6.09387	0.0403625	VASP_strain_mp-861892_1x1x1_0.02.vasp	-6.13424	-6.07969	0.054549
VASP_strain_mp-1094971_1x1x1_0.02.vasp	-2.57675	-2.57893	0.00218129	VASP_strain_mp-1094971_1x1x1_0.02.vasp	-2.57675	-2.57826	0.00151021
VASP_strain_mp-1187920_1x1x1_-0.04.vasp	-5.49461	-5.64523	0.150618	VASP_strain_mp-1187920_1x1x1_-0.04.vasp	-5.49461	-5.61453	0.119913
VASP_strain_mp-1187539_1x1x1_0.04.vasp	-2.32474	-2.29279	0.0319487	VASP_strain_mp-1187539_1x1x1_0.04.vasp	-2.32474	-2.26773	0.0570063
VASP_strain_mp-11276_1x1x1_-0.05.vasp	-6.0885	-6.27762	0.189128	VASP_strain_mp-11276_1x1x1_-0.05.vasp	-6.0885	-6.22431	0.135813
VASP_strain_mp-866056_1x1x1_0.05.vasp	-7.26407	-7.02131	0.242756	VASP_strain_mp-866056_1x1x1_0.05.vasp	-7.26407	-7.22718	0.0368855
VASP_strain_mp-865936_1x1x1_0.02.vasp	-6.28651	-6.2622	0.0243178	VASP_strain_mp-865936_1x1x1_0.02.vasp	-6.28651	-6.23003	0.0564863
VASP_strain_mp-1216688_1x1x1_0.03.vasp	-8.79994	-8.72041	0.079538	VASP_strain_mp-1216688_1x1x1_0.03.vasp	-8.79994	-8.73161	0.0683389
VASP_strain_mp-151_1x1x1_-0.01.vasp	-2.21075	-2.22563	0.0148866	VASP_strain_mp-151_1x1x1_-0.01.vasp	-2.21075	-2.20747	0.00327942
VASP_strain_mp-1206694_1x1x1_-0.01.vasp	-6.83749	-6.86099	0.023496	VASP_strain_mp-1206694_1x1x1_-0.01.vasp	-6.83749	-6.81141	0.0260821
VASP_strain_mp-1097702_1x1x1_0.04.vasp	-2.87889	-2.91038	0.0314916	VASP_strain_mp-1097702_1x1x1_0.04.vasp	-2.87889	-2.82792	0.0509687
VASP_strain_mp-1095994_1x1x1_-0.01.vasp	-4.55963	-4.6238	0.0641674	VASP_strain_mp-1095994_1x1x1_-0.01.vasp	-4.55963	-4.704	0.14437
VASP_strain_mp-1097423_1x1x1_-0.03.vasp	-4.13503	-4.11867	0.0163596	VASP_strain_mp-1097423_1x1x1_-0.03.vasp	-4.13503	-4.1021	0.0329241
VASP_strain_mp-67_1x1x1_-0.02.vasp	-6.24985	-6.26253	0.0126799	VASP_strain_mp-67_1x1x1_-0.02.vasp	-6.24985	-6.27205	0.0222017
VASP_strain_mp-864896_1x1x1_0.04.vasp	-8.93954	-8.80422	0.135322	VASP_strain_mp-864896_1x1x1_0.04.vasp	-8.93954	-8.79826	0.141281
VASP_strain_mp-977357_1x1x1_-0.05.vasp	-11.6193	-11.8709	0.251602	VASP_strain_mp-977357_1x1x1_-0.05.vasp	-11.6193	-11.8406	0.221223
VASP_strain_mp-1206874_1x1x1_-0.01.vasp	-5.18854	-5.21654	0.0280001	VASP_strain_mp-1206874_1x1x1_-0.01.vasp	-5.18854	-5.15528	0.0332643
VASP_strain_mp-1096467_1x1x1_0.03.vasp	-4.58591	-4.60621	0.0203085	VASP_strain_mp-1096467_1x1x1_0.03.vasp	-4.58591	-4.57309	0.0128188
VASP_strain_mp-1097584_1x1x1_-0.02.vasp	-2.08187	-2.10736	0.0254958	VASP_strain_mp-1097584_1x1x1_-0.02.vasp	-2.08187	-2.09608	0.0142104
VASP_strain_mp-2286_1x1x1_-0.04.vasp	-3.70368	-3.59257	0.11111	VASP_strain_mp-2286_1x1x1_-0.04.vasp	-3.70368	-3.69564	0.00803764
VASP_strain_mp-1662_1x1x1_0.01.vasp	-3.23674	-3.24539	0.00864705	VASP_strain_mp-1662_1x1x1_0.01.vasp	-3.23674	-3.23786	0.00112261
VASP_strain_mp-1097142_1x1x1_-0.05.vasp	-0.271993	-0.270908	0.00108483	VASP_strain_mp-1097142_1x1x1_-0.05.vasp	-0.271993	-0.272264	0.000271397
VASP_strain_mp-1183825_1x1x1_0.02.vasp	-5.4409	-5.4392	0.00169638	VASP_strain_mp-1183825_1x1x1_0.02.vasp	-5.4409	-5.37725	0.0636496
VASP_strain_mp-977580_1x1x1_-0.02.vasp	-4.71574	-4.75769	0.0419507	VASP_strain_mp-977580_1x1x1_-0.02.vasp	-4.71574	-4.7734	0.0576663
VASP_strain_mp-1056059_1x1x1_0.01.vasp	-3.38662	-3.05495	0.331673	VASP_strain_mp-1056059_1x1x1_0.01.vasp	-3.38662	-3.22664	0.15998
VASP_strain_mp-1187349_1x1x1_-0.04.vasp	-2.39528	-2.4446	0.0493236	VASP_strain_mp-1187349_1x1x1_-0.04.vasp	-2.39528	-2.48548	0.0901975
VASP_strain_mp-1002209_1x1x1_-0.01.vasp	-9.86325	-9.89313	0.0298793	VASP_strain_mp-1002209_1x1x1_-0.01.vasp	-9.86325	-9.79377	0.0694753
VASP_strain_mp-1097606_1x1x1_-0.04.vasp	-2.69643	-2.7486	0.0521702	VASP_strain_mp-1097606_1x1x1_-0.04.vasp	-2.69643	-2.70796	0.0115249
VASP_strain_mp-1222426_1x1x1_0.03.vasp	-7.08855	-7.08803	0.000519705	VASP_strain_mp-1222426_1x1x1_0.03.vasp	-7.08855	-7.08332	0.00522701
VASP_strain_mp-862553_1x1x1_0.01.vasp	-6.69226	-6.65837	0.0338942	VASP_strain_mp-862553_1x1x1_0.01.vasp	-6.69226	-6.59716	0.0950971
VASP_strain_mp-19920_1x1x1_-0.02.vasp	-5.42084	-5.4475	0.026658	VASP_strain_mp-19920_1x1x1_-0.02.vasp	-5.42084	-5.44614	0.0252992
VASP_strain_mp-8093_1x1x1_-0.03.vasp	-1.75684	-1.76024	0.00339686	VASP_strain_mp-8093_1x1x1_-0.03.vasp	-1.75684	-1.80401	0.0471693
VASP_strain_mp-972541_1x1x1_0.02.vasp	-3.72801	-3.71953	0.00847992	VASP_strain_mp-972541_1x1x1_0.02.vasp	-3.72801	-3.68993	0.0380821
VASP_strain_mp-1186724_1x1x1_-0.04.vasp	-4.71779	-4.7355	0.017716	VASP_strain_mp-1186724_1x1x1_-0.04.vasp	-4.71779	-4.72748	0.00969588
VASP_strain_mp-867978_1x1x1_-0.03.vasp	-6.06236	-6.14755	0.0851936	VASP_strain_mp-867978_1x1x1_-0.03.vasp	-6.06236	-6.16683	0.104475
VASP_strain_mp-30593_1x1x1_-0.01.vasp	-3.64552	-3.62006	0.0254657	VASP_strain_mp-30593_1x1x1_-0.01.vasp	-3.64552	-3.58365	0.0618684
VASP_strain_mp-30344_1x1x1_-0.03.vasp	-2.56338	-2.57774	0.0143549	VASP_strain_mp-30344_1x1x1_-0.03.vasp	-2.56338	-2.59285	0.0294715
VASP_strain_mp-1187240_1x1x1_-0.04.vasp	-1.98122	-2.01439	0.0331789	VASP_strain_mp-1187240_1x1x1_-0.04.vasp	-1.98122	-2.0376	0.0563834
VASP_strain_mp-2222_1x1x1_-0.02.vasp	-4.24601	-4.23265	0.0133651	VASP_strain_mp-2222_1x1x1_-0.02.vasp	-4.24601	-4.20659	0.0394249
VASP_strain_mp-1187628_1x1x1_0.04.vasp	-7.00474	-6.93567	0.0690729	VASP_strain_mp-1187628_1x1x1_0.04.vasp	-7.00474	-6.87749	0.127252
VASP_strain_mp-1219456_1x1x1_0.04.vasp	-3.38853	-3.40581	0.0172794	VASP_strain_mp-1219456_1x1x1_0.04.vasp	-3.38853	-3.46518	0.0766531
VASP_strain_mp-20369_1x1x1_-0.01.vasp	-3.82479	-3.86635	0.0415568	VASP_strain_mp-20369_1x1x1_-0.01.vasp	-3.82479	-3.85436	0.0295653
VASP_strain_mp-1095846_1x1x1_-0.03.vasp	-1.17038	-1.2007	0.0303136	VASP_strain_mp-1095846_1x1x1_-0.03.vasp	-1.17038	-1.18527	0.0148831
VASP_strain_mp-1245812_1x1x1_-0.03.vasp	-4.06348	-4.10631	0.0428256	VASP_strain_mp-1245812_1x1x1_-0.03.vasp	-4.06348	-4.16317	0.0996839
VASP_strain_mp-972517_1x1x1_0.05.vasp	-5.95175	-5.90808	0.04367	VASP_strain_mp-972517_1x1x1_0.05.vasp	-5.95175	-5.88362	0.0681307
VASP_strain_mp-1186574_1x1x1_-0.04.vasp	-5.19612	-5.32275	0.126632	VASP_strain_mp-1186574_1x1x1_-0.04.vasp	-5.19612	-5.33376	0.137642
VASP_strain_mp-861656_1x1x1_0.01.vasp	-9.04886	-9.01694	0.0319124	VASP_strain_mp-861656_1x1x1_0.01.vasp	-9.04886	-9.01763	0.0312259
VASP_strain_mp-862291_1x1x1_0.03.vasp	-5.93848	-5.84186	0.0966142	VASP_strain_mp-862291_1x1x1_0.03.vasp	-5.93848	-5.82097	0.117509
VASP_strain_mp-862932_1x1x1_0.04.vasp	-4.06455	-4.00984	0.0547135	VASP_strain_mp-862932_1x1x1_0.04.vasp	-4.06455	-3.98818	0.0763712
VASP_strain_mp-19919_1x1x1_0.03.vasp	-4.47879	-4.46822	0.0105719	VASP_strain_mp-19919_1x1x1_0.03.vasp	-4.47879	-4.45201	0.0267858
VASP_strain_mp-1094496_1x1x1_-0.05.vasp	-5.15931	-5.22866	0.0693563	VASP_strain_mp-1094496_1x1x1_-0.05.vasp	-5.15931	-5.24767	0.0883596
VASP_strain_mp-977374_1x1x1_0.02.vasp	-4.94274	-4.89221	0.0505303	VASP_strain_mp-977374_1x1x1_0.02.vasp	-4.94274	-4.9165	0.0262458
VASP_strain_mp-1181502_1x1x1_-0.03.vasp	-4.42463	-4.42981	0.00518627	VASP_strain_mp-1181502_1x1x1_-0.03.vasp	-4.42463	-4.51137	0.086745
VASP_strain_mp-1187581_1x1x1_0.01.vasp	-7.92165	-7.92217	0.000525239	VASP_strain_mp-1187581_1x1x1_0.01.vasp	-7.92165	-7.82108	0.100571
VASP_strain_mp-30796_1x1x1_0.03.vasp	-6.73117	-6.87072	0.139548	VASP_strain_mp-30796_1x1x1_0.03.vasp	-6.73117	-6.74252	0.0113465
VASP_strain_mp-1886_1x1x1_0.01.vasp	-3.06279	-3.04563	0.017157	VASP_strain_mp-1886_1x1x1_0.01.vasp	-3.06279	-3.05331	0.00947978
VASP_strain_mp-999295_1x1x1_-0.04.vasp	-7.54294	-7.57359	0.0306533	VASP_strain_mp-999295_1x1x1_-0.04.vasp	-7.54294	-7.45089	0.0920528
VASP_strain_mp-1184158_1x1x1_0.01.vasp	-6.77452	-6.75976	0.0147611	VASP_strain_mp-1184158_1x1x1_0.01.vasp	-6.77452	-6.77174	0.00278142
VASP_strain_mp-24289_1x1x1_0.01.vasp	-4.36216	-4.36317	0.001009	VASP_strain_mp-24289_1x1x1_0.01.vasp	-4.36216	-4.38607	0.0239125
VASP_strain_mp-568926_1x1x1_-0.01.vasp	-5.60791	-5.74069	0.132783	VASP_strain_mp-568926_1x1x1_-0.01.vasp	-5.60791	-5.6798	0.0718889
VASP_strain_mp-631324_1x1x1_0.05.vasp	-5.94596	-6.1916	0.245639	VASP_strain_mp-631324_1x1x1_0.05.vasp	-5.94596	-6.20808	0.26212
VASP_strain_mp-980661_1x1x1_-0.05.vasp	-3.74886	-3.84438	0.0955183	VASP_strain_mp-980661_1x1x1_-0.05.vasp	-3.74886	-3.87682	0.127958
VASP_strain_mp-973535_1x1x1_-0.02.vasp	-1.74358	-1.71395	0.0296304	VASP_strain_mp-973535_1x1x1_-0.02.vasp	-1.74358	-1.70521	0.0383722
VASP_strain_mp-1183838_1x1x1_-0.03.vasp	-5.47035	-5.56699	0.0966374	VASP_strain_mp-1183838_1x1x1_-0.03.vasp	-5.47035	-5.5508	0.0804498
VASP_strain_mp-1002105_1x1x1_0.03.vasp	-9.13846	-8.9698	0.168665	VASP_strain_mp-1002105_1x1x1_0.03.vasp	-9.13846	-9.04422	0.0942465
VASP_strain_mp-9080_1x1x1_-0.02.vasp	-5.26184	-5.28936	0.0275159	VASP_strain_mp-9080_1x1x1_-0.02.vasp	-5.26184	-5.32694	0.0650932
VASP_strain_mp-568145_1x1x1_-0.03.vasp	-0.0401388	-0.117783	0.0776443	VASP_strain_mp-568145_1x1x1_-0.03.vasp	-0.0401388	0.103528	0.143667
VASP_strain_mp-790_1x1x1_0.05.vasp	-6.74087	-6.63576	0.105103	VASP_strain_mp-790_1x1x1_0.05.vasp	-6.74087	-6.639	0.101866
VASP_strain_mp-1227998_1x1x1_0.01.vasp	-7.44983	-7.42643	0.0233974	VASP_strain_mp-1227998_1x1x1_0.01.vasp	-7.44983	-7.41333	0.0365002
VASP_strain_mp-1186098_1x1x1_0.04.vasp	-2.9456	-2.92179	0.0238187	VASP_strain_mp-1186098_1x1x1_0.04.vasp	-2.9456	-2.9319	0.0137081
VASP_strain_mp-1064647_1x1x1_0.05.vasp	-3.33001	-3.29084	0.039176	VASP_strain_mp-1064647_1x1x1_0.05.vasp	-3.33001	-3.2832	0.0468156
VASP_strain_mp-41_1x1x1_-0.05.vasp	-8.42543	-8.61334	0.18791	VASP_strain_mp-41_1x1x1_-0.05.vasp	-8.42543	-8.56699	0.141567
VASP_strain_mp-983237_1x1x1_0.02.vasp	-3.08174	-3.07056	0.0111754	VASP_strain_mp-983237_1x1x1_0.02.vasp	-3.08174	-3.05942	0.0223132
VASP_strain_mp-976856_1x1x1_0.02.vasp	-1.36132	-1.36499	0.00366818	VASP_strain_mp-976856_1x1x1_0.02.vasp	-1.36132	-1.32816	0.0331624
VASP_strain_mp-1184277_1x1x1_0.05.vasp	-7.94519	-7.85429	0.0909015	VASP_strain_mp-1184277_1x1x1_0.05.vasp	-7.94519	-7.8695	0.0756928
VASP_strain_mp-1063817_1x1x1_-0.04.vasp	-0.78234	-0.87531	0.0929694	VASP_strain_mp-1063817_1x1x1_-0.04.vasp	-0.78234	-0.924251	0.14191
VASP_strain_mp-1001612_1x1x1_-0.02.vasp	-5.73156	-5.80558	0.0740171	VASP_strain_mp-1001612_1x1x1_-0.02.vasp	-5.73156	-5.76811	0.0365416
VASP_strain_mp-1096039_1x1x1_0.01.vasp	-3.52698	-3.56532	0.0383423	VASP_strain_mp-1096039_1x1x1_0.01.vasp	-3.52698	-3.52965	0.00266874
VASP_strain_mp-1096824_1x1x1_0.05.vasp	-5.98299	-5.92418	0.058809	VASP_strain_mp-1096824_1x1x1_0.05.vasp	-5.98299	-5.90521	0.0777799
VASP_strain_mp-1186053_1x1x1_-0.01.vasp	-2.53478	-2.5255	0.00927926	VASP_strain_mp-1186053_1x1x1_-0.01.vasp	-2.53478	-2.52503	0.00975223
VASP_strain_mp-1008832_1x1x1_-0.05.vasp	-9.70937	-9.9157	0.206327	VASP_strain_mp-1008832_1x1x1_-0.05.vasp	-9.70937	-9.75016	0.0407869
VASP_strain_mp-1095888_1x1x1_-0.01.vasp	-1.21355	-1.30086	0.0873025	VASP_strain_mp-1095888_1x1x1_-0.01.vasp	-1.21355	-1.40768	0.194128
VASP_strain_mp-1186863_1x1x1_0.05.vasp	-1.30131	-1.33896	0.037647	VASP_strain_mp-1186863_1x1x1_0.05.vasp	-1.30131	-1.2754	0.0259121
VASP_strain_mp-1185965_1x1x1_-0.01.vasp	-4.57282	-4.62623	0.0534004	VASP_strain_mp-1185965_1x1x1_-0.01.vasp	-4.57282	-4.63393	0.0611044
VASP_strain_mp-1183174_1x1x1_0.01.vasp	-1.999	-1.98415	0.0148443	VASP_strain_mp-1183174_1x1x1_0.01.vasp	-1.999	-1.98292	0.0160828
VASP_strain_mp-631356_1x1x1_-0.04.vasp	-7.49023	-7.57129	0.0810586	VASP_strain_mp-631356_1x1x1_-0.04.vasp	-7.49023	-7.58726	0.0970298
VASP_strain_mp-1183840_1x1x1_-0.02.vasp	-5.46993	-5.51167	0.0417389	VASP_strain_mp-1183840_1x1x1_-0.02.vasp	-5.46993	-5.50536	0.0354303
VASP_strain_mp-25210_1x1x1_0.04.vasp	-5.81544	-5.78834	0.0271094	VASP_strain_mp-25210_1x1x1_0.04.vasp	-5.81544	-5.77757	0.0378717
VASP_strain_mp-1096697_1x1x1_0.05.vasp	-2.34665	-2.40847	0.0618157	VASP_strain_mp-1096697_1x1x1_0.05.vasp	-2.34665	-2.37119	0.0245346
VASP_strain_mp-571079_1x1x1_0.03.vasp	-3.03311	-3.00601	0.0271022	VASP_strain_mp-571079_1x1x1_0.03.vasp	-3.03311	-3.00933	0.023788
VASP_strain_mp-1093763_1x1x1_-0.01.vasp	-4.11493	-4.10726	0.00766196	VASP_strain_mp-1093763_1x1x1_-0.01.vasp	-4.11493	-4.09713	0.017792
VASP_strain_mp-862960_1x1x1_-0.05.vasp	-4.529	-4.5954	0.0663942	VASP_strain_mp-862960_1x1x1_-0.05.vasp	-4.529	-4.58079	0.051785
VASP_strain_mp-1095766_1x1x1_-0.01.vasp	-0.204889	-0.188747	0.0161417	VASP_strain_mp-1095766_1x1x1_-0.01.vasp	-0.204889	-0.207565	0.00267625
VASP_strain_mp-30373_1x1x1_-0.03.vasp	-2.35058	-2.37418	0.0236058	VASP_strain_mp-30373_1x1x1_-0.03.vasp	-2.35058	-2.36253	0.0119531
VASP_strain_mp-30878_1x1x1_-0.05.vasp	-3.73551	-3.82141	0.0858925	VASP_strain_mp-30878_1x1x1_-0.05.vasp	-3.73551	-3.79339	0.0578708
VASP_strain_mp-1184257_1x1x1_0.02.vasp	-2.83293	-2.83372	0.000795973	VASP_strain_mp-1184257_1x1x1_0.02.vasp	-2.83293	-2.85235	0.0194205
VASP_strain_mp-867753_1x1x1_0.05.vasp	-5.83161	-5.71505	0.116557	VASP_strain_mp-867753_1x1x1_0.05.vasp	-5.83161	-5.75089	0.0807203
VASP_strain_mp-1331_1x1x1_-0.05.vasp	-2.9797	-3.02711	0.0474006	VASP_strain_mp-1331_1x1x1_-0.05.vasp	-2.9797	-3.00885	0.0291466
VASP_strain_mp-581707_1x1x1_-0.03.vasp	-4.83293	-4.92133	0.0883925	VASP_strain_mp-581707_1x1x1_-0.03.vasp	-4.83293	-4.9063	0.0733653
VASP_strain_mp-1018275_1x1x1_0.01.vasp	-4.43225	-4.40087	0.0313815	VASP_strain_mp-1018275_1x1x1_0.01.vasp	-4.43225	-4.36491	0.0673407
VASP_strain_mp-1186904_1x1x1_0.05.vasp	-7.61233	-7.67108	0.0587449	VASP_strain_mp-1186904_1x1x1_0.05.vasp	-7.61233	-7.65454	0.0422061
VASP_strain_mp-862719_1x1x1_-0.03.vasp	-6.72128	-6.8104	0.0891169	VASP_strain_mp-862719_1x1x1_-0.03.vasp	-6.72128	-6.82376	0.10248
VASP_strain_mp-867887_1x1x1_-0.05.vasp	-5.92401	-6.05751	0.133505	VASP_strain_mp-867887_1x1x1_-0.05.vasp	-5.92401	-6.08017	0.156158
VASP_strain_mp-971_1x1x1_-0.05.vasp	-3.36503	-3.3944	0.0293715	VASP_strain_mp-971_1x1x1_-0.05.vasp	-3.36503	-3.44337	0.0783422
VASP_strain_mp-972204_1x1x1_-0.01.vasp	-9.79195	-9.83079	0.0388382	VASP_strain_mp-972204_1x1x1_-0.01.vasp	-9.79195	-9.78845	0.00350384
VASP_strain_mp-11457_1x1x1_-0.03.vasp	-9.43279	-9.50548	0.072686	VASP_strain_mp-11457_1x1x1_-0.03.vasp	-9.43279	-9.58733	0.154534
VASP_strain_mp-631412_1x1x1_0.04.vasp	-6.89089	-6.73708	0.15381	VASP_strain_mp-631412_1x1x1_0.04.vasp	-6.89089	-6.78008	0.110815
VASP_strain_mp-1096375_1x1x1_0.05.vasp	-5.28901	-5.24458	0.0444299	VASP_strain_mp-1096375_1x1x1_0.05.vasp	-5.28901	-5.29033	0.00132118
VASP_strain_mp-1095946_1x1x1_0.05.vasp	-1.19793	-1.33086	0.13293	VASP_strain_mp-1095946_1x1x1_0.05.vasp	-1.19793	-1.33398	0.13605
VASP_strain_mp-2634_1x1x1_-0.04.vasp	-10.2389	-10.2214	0.0175088	VASP_strain_mp-2634_1x1x1_-0.04.vasp	-10.2389	-10.1343	0.10457
VASP_strain_mp-1138_1x1x1_-0.02.vasp	-4.81933	-4.87305	0.0537131	VASP_strain_mp-1138_1x1x1_-0.02.vasp	-4.81933	-4.82904	0.00970536
VASP_strain_mp-977585_1x1x1_-0.04.vasp	-7.0432	-7.16958	0.12638	VASP_strain_mp-977585_1x1x1_-0.04.vasp	-7.0432	-7.09617	0.0529735
VASP_strain_mp-1187307_1x1x1_0.01.vasp	-5.34741	-5.36059	0.0131801	VASP_strain_mp-1187307_1x1x1_0.01.vasp	-5.34741	-5.28696	0.0604533
VASP_strain_mp-1218320_1x1x1_-0.01.vasp	-7.01525	-7.04033	0.0250833	VASP_strain_mp-1218320_1x1x1_-0.01.vasp	-7.01525	-7.00685	0.00839983
VASP_strain_mp-1184771_1x1x1_-0.03.vasp	-8.4475	-8.58384	0.136337	VASP_strain_mp-1184771_1x1x1_-0.03.vasp	-8.4475	-8.56011	0.112604
VASP_strain_mp-978829_1x1x1_0.03.vasp	-5.79057	-5.75231	0.0382607	VASP_strain_mp-978829_1x1x1_0.03.vasp	-5.79057	-5.74647	0.0441069
VASP_strain_mp-592_1x1x1_-0.01.vasp	-9.26271	-9.27255	0.00983992	VASP_strain_mp-592_1x1x1_-0.01.vasp	-9.26271	-9.21479	0.0479205
VASP_strain_mp-1184690_1x1x1_0.02.vasp	-5.133	-5.10616	0.0268313	VASP_strain_mp-1184690_1x1x1_0.02.vasp	-5.133	-5.11183	0.0211658
VASP_strain_mp-7240_1x1x1_0.02.vasp	-6.2039	-6.17257	0.0313275	VASP_strain_mp-7240_1x1x1_0.02.vasp	-6.2039	-6.13176	0.072136
VASP_strain_mp-865117_1x1x1_-0.04.vasp	-2.76897	-2.80123	0.0322595	VASP_strain_mp-865117_1x1x1_-0.04.vasp	-2.76897	-2.82656	0.0575894
VASP_strain_mp-1186244_1x1x1_0.02.vasp	-4.69995	-4.68863	0.0113198	VASP_strain_mp-1186244_1x1x1_0.02.vasp	-4.69995	-4.65197	0.0479731
VASP_strain_mp-1094724_1x1x1_0.03.vasp	-2.33153	-2.27251	0.059018	VASP_strain_mp-1094724_1x1x1_0.03.vasp	-2.33153	-2.27589	0.0556412
VASP_strain_mp-117_1x1x1_0.05.vasp	-3.81408	-3.48848	0.325605	VASP_strain_mp-117_1x1x1_0.05.vasp	-3.81408	-3.37668	0.437406
VASP_strain_mp-962070_1x1x1_0.04.vasp	-4.48929	-4.41003	0.0792646	VASP_strain_mp-962070_1x1x1_0.04.vasp	-4.48929	-4.43927	0.050015
VASP_strain_mp-10231_1x1x1_-0.04.vasp	-5.04522	-5.03631	0.00890611	VASP_strain_mp-10231_1x1x1_-0.04.vasp	-5.04522	-5.06479	0.0195683
VASP_strain_mp-865025_1x1x1_-0.03.vasp	-12.006	-12.1377	0.131744	VASP_strain_mp-865025_1x1x1_-0.03.vasp	-12.006	-12.1871	0.181147
VASP_strain_mp-1096675_1x1x1_-0.03.vasp	-4.3081	-4.34589	0.0377943	VASP_strain_mp-1096675_1x1x1_-0.03.vasp	-4.3081	-4.42961	0.121518
VASP_strain_mp-1094297_1x1x1_0.04.vasp	-1.58666	-1.55069	0.0359723	VASP_strain_mp-1094297_1x1x1_0.04.vasp	-1.58666	-1.54786	0.0388096
VASP_strain_mp-862676_1x1x1_0.05.vasp	-3.2571	-3.22857	0.0285251	VASP_strain_mp-862676_1x1x1_0.05.vasp	-3.2571	-3.20374	0.0533563
VASP_strain_mp-1185377_1x1x1_0.03.vasp	-2.72492	-2.68952	0.0353981	VASP_strain_mp-1185377_1x1x1_0.03.vasp	-2.72492	-2.67093	0.0539952
VASP_strain_mp-1097218_1x1x1_0.05.vasp	-0.636178	-0.641146	0.00496804	VASP_strain_mp-1097218_1x1x1_0.05.vasp	-0.636178	-0.652688	0.0165097
VASP_strain_mp-1095961_1x1x1_-0.05.vasp	-1.25191	-1.27684	0.0249283	VASP_strain_mp-1095961_1x1x1_-0.05.vasp	-1.25191	-1.37639	0.124473
VASP_strain_mp-463_1x1x1_-0.05.vasp	-4.13928	-3.93376	0.205518	VASP_strain_mp-463_1x1x1_-0.05.vasp	-4.13928	-4.14503	0.00574994
VASP_strain_mp-1097649_1x1x1_-0.02.vasp	-0.820923	-0.84768	0.026757	VASP_strain_mp-1097649_1x1x1_-0.02.vasp	-0.820923	-0.903006	0.0820838
VASP_strain_mp-1097610_1x1x1_0.04.vasp	-2.86302	-2.89959	0.0365753	VASP_strain_mp-1097610_1x1x1_0.04.vasp	-2.86302	-2.86035	0.00267344
VASP_strain_mp-1120791_1x1x1_0.02.vasp	-4.51617	-4.56471	0.04854	VASP_strain_mp-1120791_1x1x1_0.02.vasp	-4.51617	-4.50897	0.00720076
VASP_strain_mp-1064981_1x1x1_-0.05.vasp	-8.85085	-8.99278	0.141936	VASP_strain_mp-1064981_1x1x1_-0.05.vasp	-8.85085	-8.98602	0.135174
VASP_strain_mp-631547_1x1x1_-0.01.vasp	-4.58842	-4.91273	0.324312	VASP_strain_mp-631547_1x1x1_-0.01.vasp	-4.58842	-4.74825	0.159831
VASP_strain_mp-1187079_1x1x1_0.04.vasp	-1.47648	-1.46612	0.0103523	VASP_strain_mp-1187079_1x1x1_0.04.vasp	-1.47648	-1.43361	0.0428669
VASP_strain_mp-1219523_1x1x1_0.02.vasp	-9.89869	-9.88233	0.0163579	VASP_strain_mp-1219523_1x1x1_0.02.vasp	-9.89869	-9.80297	0.095721
VASP_strain_mp-20420_1x1x1_-0.05.vasp	-4.3693	-4.42352	0.0542217	VASP_strain_mp-20420_1x1x1_-0.05.vasp	-4.3693	-4.42847	0.0591662
VASP_strain_mp-22912_1x1x1_-0.01.vasp	-8.18953	-8.25948	0.0699519	VASP_strain_mp-22912_1x1x1_-0.01.vasp	-8.18953	-8.16942	0.020114
VASP_strain_mp-867859_1x1x1_0.02.vasp	-7.23856	-7.18787	0.050683	VASP_strain_mp-867859_1x1x1_0.02.vasp	-7.23856	-7.20128	0.0372763
VASP_strain_mp-974758_1x1x1_-0.02.vasp	-1.20822	-1.29175	0.0835349	VASP_strain_mp-974758_1x1x1_-0.02.vasp	-1.20822	-1.36866	0.160442
VASP_strain_mp-669_1x1x1_-0.02.vasp	-5.43223	-5.46399	0.0317586	VASP_strain_mp-669_1x1x1_-0.02.vasp	-5.43223	-5.42341	0.00882476
VASP_strain_mp-862815_1x1x1_-0.01.vasp	-4.3537	-4.34709	0.0066106	VASP_strain_mp-862815_1x1x1_-0.01.vasp	-4.3537	-4.41397	0.0602661
VASP_strain_mp-1534_1x1x1_0.01.vasp	-7.2951	-7.29669	0.00159039	VASP_strain_mp-1534_1x1x1_0.01.vasp	-7.2951	-7.30321	0.00810665
VASP_strain_mp-1183700_1x1x1_-0.02.vasp	-8.19207	-8.24419	0.0521146	VASP_strain_mp-1183700_1x1x1_-0.02.vasp	-8.19207	-8.24292	0.0508502
VASP_strain_mvc-15478_1x1x1_-0.01.vasp	-6.72897	-7.09879	0.369814	VASP_strain_mvc-15478_1x1x1_-0.01.vasp	-6.72897	-7.08994	0.360969
VASP_strain_mp-1096122_1x1x1_0.03.vasp	-5.02484	-5.07078	0.0459369	VASP_strain_mp-1096122_1x1x1_0.03.vasp	-5.02484	-5.01197	0.0128764
VASP_strain_mp-1184535_1x1x1_-0.05.vasp	-7.46078	-7.64492	0.184145	VASP_strain_mp-1184535_1x1x1_-0.05.vasp	-7.46078	-7.62085	0.160075
VASP_strain_mp-1215401_1x1x1_0.05.vasp	-2.88009	-2.83459	0.045507	VASP_strain_mp-1215401_1x1x1_0.05.vasp	-2.88009	-2.80785	0.0722413
VASP_strain_mp-1093793_1x1x1_0.01.vasp	-4.20555	-4.21833	0.0127761	VASP_strain_mp-1093793_1x1x1_0.01.vasp	-4.20555	-4.20068	0.00487818
VASP_strain_mp-27679_1x1x1_-0.01.vasp	-4.53414	-4.55583	0.0216903	VASP_strain_mp-27679_1x1x1_-0.01.vasp	-4.53414	-4.55875	0.0246072
VASP_strain_mp-1215_1x1x1_-0.03.vasp	-8.64668	-8.73903	0.0923526	VASP_strain_mp-1215_1x1x1_-0.03.vasp	-8.64668	-8.74303	0.0963443
VASP_strain_mp-981544_1x1x1_-0.04.vasp	-4.71607	-4.74019	0.0241243	VASP_strain_mp-981544_1x1x1_-0.04.vasp	-4.71607	-4.73158	0.0155058
VASP_strain_mp-865430_1x1x1_0.03.vasp	-6.10386	-6.08765	0.0162121	VASP_strain_mp-865430_1x1x1_0.03.vasp	-6.10386	-6.08092	0.0229425
VASP_strain_mp-1224347_1x1x1_0.01.vasp	-9.11798	-9.09424	0.023744	VASP_strain_mp-1224347_1x1x1_0.01.vasp	-9.11798	-9.08204	0.0359431
VASP_strain_mp-1027_1x1x1_0.02.vasp	-8.66008	-8.62339	0.0366907	VASP_strain_mp-1027_1x1x1_0.02.vasp	-8.66008	-8.65093	0.00914183
VASP_strain_mp-1094874_1x1x1_-0.04.vasp	-6.44819	-6.75239	0.304204	VASP_strain_mp-1094874_1x1x1_-0.04.vasp	-6.44819	-6.51685	0.0686548
VASP_strain_mp-1097463_1x1x1_0.02.vasp	-1.31734	-1.38719	0.0698486	VASP_strain_mp-1097463_1x1x1_0.02.vasp	-1.31734	-1.38822	0.0708819
VASP_strain_mp-1223792_1x1x1_-0.05.vasp	-3.05147	-3.08118	0.0297154	VASP_strain_mp-1223792_1x1x1_-0.05.vasp	-3.05147	-3.12636	0.0748928
VASP_strain_mp-1186607_1x1x1_-0.03.vasp	-3.70874	-3.7704	0.0616544	VASP_strain_mp-1186607_1x1x1_-0.03.vasp	-3.70874	-3.75044	0.0416928
VASP_strain_mp-1224319_1x1x1_-0.04.vasp	-4.56797	-4.59631	0.0283465	VASP_strain_mp-1224319_1x1x1_-0.04.vasp	-4.56797	-4.59345	0.0254837
VASP_strain_mp-2857_1x1x1_-0.01.vasp	-9.20355	-9.20262	0.000925116	VASP_strain_mp-2857_1x1x1_-0.01.vasp	-9.20355	-9.07804	0.12551
VASP_strain_mp-2334_1x1x1_0.04.vasp	-4.39448	-4.32578	0.0687015	VASP_strain_mp-2334_1x1x1_0.04.vasp	-4.39448	-4.32227	0.0722068
VASP_strain_mp-30820_1x1x1_0.01.vasp	-4.1803	-4.16951	0.01079	VASP_strain_mp-30820_1x1x1_0.01.vasp	-4.1803	-4.17041	0.00988721
VASP_strain_mp-114_1x1x1_-0.04.vasp	-13.6906	-13.7549	0.0643416	VASP_strain_mp-114_1x1x1_-0.04.vasp	-13.6906	-13.6943	0.00370371
VASP_strain_mp-1185156_1x1x1_0.04.vasp	-5.59297	-5.58363	0.00934921	VASP_strain_mp-1185156_1x1x1_0.04.vasp	-5.59297	-5.57064	0.0223371
VASP_strain_mp-567348_1x1x1_0.04.vasp	-5.19078	-5.12557	0.0652071	VASP_strain_mp-567348_1x1x1_0.04.vasp	-5.19078	-5.13801	0.0527729
VASP_strain_mp-1226933_1x1x1_0.03.vasp	-1.26061	-1.23729	0.0233245	VASP_strain_mp-1226933_1x1x1_0.03.vasp	-1.26061	-1.22931	0.0313056
VASP_strain_mp-864747_1x1x1_-0.03.vasp	-2.81088	-2.87604	0.0651594	VASP_strain_mp-864747_1x1x1_-0.03.vasp	-2.81088	-2.85959	0.0487092
VASP_strain_mp-20984_1x1x1_0.02.vasp	-5.28702	-5.26004	0.0269766	VASP_strain_mp-20984_1x1x1_0.02.vasp	-5.28702	-5.26056	0.0264616
VASP_strain_mp-568983_1x1x1_-0.04.vasp	-6.78064	-6.73623	0.0444138	VASP_strain_mp-568983_1x1x1_-0.04.vasp	-6.78064	-6.87593	0.0952936
VASP_strain_mp-1217467_1x1x1_0.02.vasp	-4.5016	-4.47459	0.027019	VASP_strain_mp-1217467_1x1x1_0.02.vasp	-4.5016	-4.46638	0.0352268
VASP_strain_mp-820_1x1x1_0.05.vasp	-2.02341	-1.97871	0.0446996	VASP_strain_mp-820_1x1x1_0.05.vasp	-2.02341	-2.02544	0.00202698
VASP_strain_mp-1184055_1x1x1_0.03.vasp	-7.51061	-7.45823	0.0523807	VASP_strain_mp-1184055_1x1x1_0.03.vasp	-7.51061	-7.43233	0.0782848
VASP_strain_mp-1096643_1x1x1_0.02.vasp	-1.91276	-1.89528	0.0174785	VASP_strain_mp-1096643_1x1x1_0.02.vasp	-1.91276	-1.8827	0.0300561
VASP_strain_mp-867908_1x1x1_-0.03.vasp	-4.4773	-4.51673	0.0394313	VASP_strain_mp-867908_1x1x1_-0.03.vasp	-4.4773	-4.55269	0.075386
VASP_strain_mp-1224988_1x1x1_-0.01.vasp	-4.02406	-4.03923	0.0151693	VASP_strain_mp-1224988_1x1x1_-0.01.vasp	-4.02406	-4.02746	0.00340285
VASP_strain_mp-1009221_1x1x1_0.01.vasp	-3.55241	-3.69702	0.144612	VASP_strain_mp-1009221_1x1x1_0.01.vasp	-3.55241	-3.85626	0.303851
VASP_strain_mp-567076_1x1x1_0.01.vasp	-3.1724	-3.13059	0.0418062	VASP_strain_mp-567076_1x1x1_0.01.vasp	-3.1724	-3.11859	0.053809
VASP_strain_mp-1097607_1x1x1_-0.05.vasp	-1.61378	-1.67033	0.0565423	VASP_strain_mp-1097607_1x1x1_-0.05.vasp	-1.61378	-1.74394	0.130152
VASP_strain_mp-1093728_1x1x1_0.05.vasp	-0.928568	-0.877095	0.0514728	VASP_strain_mp-1093728_1x1x1_0.05.vasp	-0.928568	-0.900633	0.0279353
VASP_strain_mp-978265_1x1x1_-0.04.vasp	-2.73479	-2.82074	0.0859522	VASP_strain_mp-978265_1x1x1_-0.04.vasp	-2.73479	-2.80583	0.0710395
VASP_strain_mp-1097175_1x1x1_-0.05.vasp	-5.56777	-5.83472	0.266943	VASP_strain_mp-1097175_1x1x1_-0.05.vasp	-5.56777	-5.91505	0.347275
VASP_strain_mp-19858_1x1x1_0.02.vasp	-1.4279	-1.4407	0.0128022	VASP_strain_mp-19858_1x1x1_0.02.vasp	-1.4279	-1.45506	0.0271552
VASP_strain_mp-1093534_1x1x1_0.02.vasp	-5.11219	-5.04573	0.0664631	VASP_strain_mp-1093534_1x1x1_0.02.vasp	-5.11219	-5.0777	0.0344915
VASP_strain_mp-867299_1x1x1_0.03.vasp	-6.9434	-6.94282	0.000581754	VASP_strain_mp-867299_1x1x1_0.03.vasp	-6.9434	-6.8594	0.0840012
VASP_strain_mp-1183173_1x1x1_-0.02.vasp	-4.90408	-4.97557	0.0714885	VASP_strain_mp-1183173_1x1x1_-0.02.vasp	-4.90408	-4.98248	0.0784024
VASP_strain_mp-861888_1x1x1_-0.05.vasp	-4.62091	-4.72784	0.10693	VASP_strain_mp-861888_1x1x1_-0.05.vasp	-4.62091	-4.76975	0.148849
VASP_strain_mp-1569_1x1x1_-0.03.vasp	-5.79864	-5.82205	0.023405	VASP_strain_mp-1569_1x1x1_-0.03.vasp	-5.79864	-5.66769	0.130954
VASP_strain_mp-1453_1x1x1_-0.04.vasp	-5.93872	-6.02109	0.0823766	VASP_strain_mp-1453_1x1x1_-0.04.vasp	-5.93872	-5.93582	0.00290228
VASP_strain_mp-1183040_1x1x1_-0.04.vasp	-7.35977	-7.42227	0.0624951	VASP_strain_mp-1183040_1x1x1_-0.04.vasp	-7.35977	-7.55807	0.198298
VASP_strain_mp-961686_1x1x1_0.04.vasp	-7.23854	-7.12691	0.111633	VASP_strain_mp-961686_1x1x1_0.04.vasp	-7.23854	-7.12036	0.118173
VASP_strain_mp-1096614_1x1x1_-0.01.vasp	-6.9623	-7.01508	0.0527887	VASP_strain_mp-1096614_1x1x1_-0.01.vasp	-6.9623	-6.93404	0.028252
VASP_strain_mp-1184092_1x1x1_0.01.vasp	-5.08536	-5.05762	0.0277337	VASP_strain_mp-1184092_1x1x1_0.01.vasp	-5.08536	-5.06969	0.0156687
VASP_strain_mp-862733_1x1x1_0.04.vasp	-4.40898	-4.37386	0.0351202	VASP_strain_mp-862733_1x1x1_0.04.vasp	-4.40898	-4.34461	0.0643691
VASP_strain_mp-1008833_1x1x1_-0.05.vasp	-10.7492	-10.8984	0.149213	VASP_strain_mp-1008833_1x1x1_-0.05.vasp	-10.7492	-10.4489	0.300296
VASP_strain_mp-862702_1x1x1_0.04.vasp	-4.20167	-4.18173	0.0199405	VASP_strain_mp-862702_1x1x1_0.04.vasp	-4.20167	-4.19892	0.00274522
VASP_strain_mp-1221963_1x1x1_-0.02.vasp	-3.57037	-3.16193	0.40844	VASP_strain_mp-1221963_1x1x1_-0.02.vasp	-3.57037	-3.44079	0.129583
VASP_strain_mp-975411_1x1x1_0.04.vasp	-2.08156	-2.05585	0.0257132	VASP_strain_mp-975411_1x1x1_0.04.vasp	-2.08156	-2.20456	0.123003
VASP_strain_mp-1187579_1x1x1_-0.03.vasp	-2.28534	-2.34756	0.062221	VASP_strain_mp-1187579_1x1x1_-0.03.vasp	-2.28534	-2.31517	0.029836
VASP_strain_mp-1184401_1x1x1_-0.01.vasp	-4.41617	-4.40886	0.00730897	VASP_strain_mp-1184401_1x1x1_-0.01.vasp	-4.41617	-4.39621	0.0199606
VASP_strain_mp-20211_1x1x1_-0.01.vasp	-8.40314	-8.36931	0.0338239	VASP_strain_mp-20211_1x1x1_-0.01.vasp	-8.40314	-8.3336	0.0695349
VASP_strain_mp-977384_1x1x1_0.03.vasp	-5.87469	-5.7794	0.0952894	VASP_strain_mp-977384_1x1x1_0.03.vasp	-5.87469	-5.80798	0.0667156
VASP_strain_mp-1222015_1x1x1_-0.04.vasp	-2.56478	-2.62311	0.0583266	VASP_strain_mp-1222015_1x1x1_-0.04.vasp	-2.56478	-2.62896	0.0641815
VASP_strain_mp-1183682_1x1x1_0.04.vasp	-8.15583	-8.11666	0.0391662	VASP_strain_mp-1183682_1x1x1_0.04.vasp	-8.15583	-7.96518	0.190648
VASP_strain_mp-862686_1x1x1_0.01.vasp	-4.8144	-4.80145	0.0129506	VASP_strain_mp-862686_1x1x1_0.01.vasp	-4.8144	-4.72398	0.0904229
VASP_strain_mp-27639_1x1x1_-0.03.vasp	-1.6622	-1.65189	0.0103159	VASP_strain_mp-27639_1x1x1_-0.03.vasp	-1.6622	-1.62338	0.0388273
VASP_strain_mp-1186850_1x1x1_0.01.vasp	-1.2036	-1.25155	0.0479544	VASP_strain_mp-1186850_1x1x1_0.01.vasp	-1.2036	-1.18119	0.0224069
VASP_strain_mp-1096399_1x1x1_-0.01.vasp	-2.60152	-2.6199	0.0183778	VASP_strain_mp-1096399_1x1x1_-0.01.vasp	-2.60152	-2.58535	0.0161694
VASP_strain_mp-983365_1x1x1_0.01.vasp	-0.905256	-0.859563	0.0456932	VASP_strain_mp-983365_1x1x1_0.01.vasp	-0.905256	-0.920976	0.0157202
VASP_strain_mp-1184816_1x1x1_-0.01.vasp	-2.18232	-2.18723	0.00490167	VASP_strain_mp-1184816_1x1x1_-0.01.vasp	-2.18232	-2.21698	0.0346546
VASP_strain_mp-1185487_1x1x1_0.02.vasp	-6.1961	-6.20254	0.00644229	VASP_strain_mp-1185487_1x1x1_0.02.vasp	-6.1961	-6.19507	0.0010265
VASP_strain_mp-861508_1x1x1_0.01.vasp	-5.29778	-5.2833	0.0144771	VASP_strain_mp-861508_1x1x1_0.01.vasp	-5.29778	-5.29369	0.0040938
VASP_strain_mp-1093594_1x1x1_0.04.vasp	-1.55859	-1.66207	0.103482	VASP_strain_mp-1093594_1x1x1_0.04.vasp	-1.55859	-1.60217	0.0435773
VASP_strain_mp-972935_1x1x1_0.01.vasp	-5.00555	-4.99389	0.0116629	VASP_strain_mp-972935_1x1x1_0.01.vasp	-5.00555	-4.98862	0.0169306
VASP_strain_mp-11496_1x1x1_-0.04.vasp	-3.12845	-3.19154	0.0630974	VASP_strain_mp-11496_1x1x1_-0.04.vasp	-3.12845	-3.20141	0.0729657
VASP_strain_mp-2097_1x1x1_0.02.vasp	-5.68004	-5.63521	0.044838	VASP_strain_mp-2097_1x1x1_0.02.vasp	-5.68004	-5.62771	0.052336
VASP_strain_mp-1095738_1x1x1_-0.01.vasp	-0.168445	-0.163075	0.00537032	VASP_strain_mp-1095738_1x1x1_-0.01.vasp	-0.168445	-0.173444	0.00499837
VASP_strain_mp-1184214_1x1x1_-0.03.vasp	-3.10429	-3.11985	0.0155593	VASP_strain_mp-1184214_1x1x1_-0.03.vasp	-3.10429	-3.11652	0.0122279
VASP_strain_mp-1093630_1x1x1_0.04.vasp	-2.89534	-3.00907	0.113726	VASP_strain_mp-1093630_1x1x1_0.04.vasp	-2.89534	-2.97218	0.0768358
VASP_strain_mp-1097311_1x1x1_-0.05.vasp	-4.65778	-4.785	0.127223	VASP_strain_mp-1097311_1x1x1_-0.05.vasp	-4.65778	-4.80463	0.146858
VASP_strain_mp-867279_1x1x1_-0.03.vasp	-8.4996	-8.64184	0.142237	VASP_strain_mp-867279_1x1x1_-0.03.vasp	-8.4996	-8.65459	0.154996
VASP_strain_mp-867979_1x1x1_-0.01.vasp	-2.43118	-2.45375	0.0225746	VASP_strain_mp-867979_1x1x1_-0.01.vasp	-2.43118	-2.44823	0.0170564
VASP_strain_mp-1094376_1x1x1_-0.04.vasp	-6.07411	-6.18029	0.106174	VASP_strain_mp-1094376_1x1x1_-0.04.vasp	-6.07411	-6.23518	0.161067
VASP_strain_mp-864988_1x1x1_-0.02.vasp	-7.96379	-8.07498	0.111184	VASP_strain_mp-864988_1x1x1_-0.02.vasp	-7.96379	-8.14615	0.182361
VASP_strain_mp-865888_1x1x1_-0.05.vasp	-8.02327	-8.23734	0.214072	VASP_strain_mp-865888_1x1x1_-0.05.vasp	-8.02327	-8.1779	0.154638
VASP_strain_mp-975515_1x1x1_0.03.vasp	-3.1223	-3.09789	0.0244142	VASP_strain_mp-975515_1x1x1_0.03.vasp	-3.1223	-3.07683	0.0454671
VASP_strain_mp-864753_1x1x1_0.03.vasp	-2.3138	-2.22948	0.084311	VASP_strain_mp-864753_1x1x1_0.03.vasp	-2.3138	-2.32047	0.00667357
VASP_strain_mp-1093746_1x1x1_-0.04.vasp	-1.57663	-1.48901	0.0876193	VASP_strain_mp-1093746_1x1x1_-0.04.vasp	-1.57663	-1.59723	0.0206022
VASP_strain_mp-7748_1x1x1_0.04.vasp	-6.25237	-6.22247	0.0299029	VASP_strain_mp-7748_1x1x1_0.04.vasp	-6.25237	-6.27595	0.0235783
VASP_strain_mp-999549_1x1x1_0.04.vasp	-10.1224	-9.66685	0.455554	VASP_strain_mp-999549_1x1x1_0.04.vasp	-10.1224	-9.80174	0.320662
VASP_strain_mp-1097307_1x1x1_-0.05.vasp	-4.22539	-4.29306	0.067673	VASP_strain_mp-1097307_1x1x1_-0.05.vasp	-4.22539	-4.29794	0.0725561
VASP_strain_mp-1186998_1x1x1_0.05.vasp	-3.59468	-3.56644	0.0282453	VASP_strain_mp-1186998_1x1x1_0.05.vasp	-3.59468	-3.5469	0.0477807
VASP_strain_mp-1097376_1x1x1_0.04.vasp	-0.323732	-0.30817	0.015562	VASP_strain_mp-1097376_1x1x1_0.04.vasp	-0.323732	-0.40788	0.0841473
VASP_strain_mp-976143_1x1x1_0.01.vasp	-3.19267	-3.19191	0.000761292	VASP_strain_mp-976143_1x1x1_0.01.vasp	-3.19267	-3.17307	0.0196009
VASP_strain_mp-1094320_1x1x1_0.01.vasp	-1.5529	-1.51458	0.0383196	VASP_strain_mp-1094320_1x1x1_0.01.vasp	-1.5529	-1.51539	0.0375102
VASP_strain_mp-1094801_1x1x1_-0.01.vasp	-2.78561	-2.80517	0.0195541	VASP_strain_mp-1094801_1x1x1_-0.01.vasp	-2.78561	-2.79802	0.0124109
VASP_strain_mp-1216527_1x1x1_0.02.vasp	-2.3708	-2.38558	0.0147771	VASP_strain_mp-1216527_1x1x1_0.02.vasp	-2.3708	-2.36944	0.00136552
VASP_strain_mp-571555_1x1x1_-0.03.vasp	-3.03024	-2.96451	0.0657318	VASP_strain_mp-571555_1x1x1_-0.03.vasp	-3.03024	-2.92651	0.103736
VASP_strain_mp-1692_1x1x1_-0.04.vasp	-4.92629	-5.04803	0.121742	VASP_strain_mp-1692_1x1x1_-0.04.vasp	-4.92629	-5.01482	0.0885326
VASP_strain_mp-1008554_1x1x1_0.04.vasp	-5.19394	-5.14374	0.0502024	VASP_strain_mp-1008554_1x1x1_0.04.vasp	-5.19394	-5.16624	0.0277072
VASP_strain_mp-1115_1x1x1_0.05.vasp	-4.73582	-4.78852	0.0526997	VASP_strain_mp-1115_1x1x1_0.05.vasp	-4.73582	-4.69799	0.0378296
VASP_strain_mp-3736_1x1x1_0.05.vasp	-5.28381	-5.20067	0.0831365	VASP_strain_mp-3736_1x1x1_0.05.vasp	-5.28381	-5.157	0.126806
VASP_strain_mp-422_1x1x1_0.04.vasp	-4.98978	-4.90042	0.0893584	VASP_strain_mp-422_1x1x1_0.04.vasp	-4.98978	-4.87466	0.115118
VASP_strain_mp-1008923_1x1x1_-0.01.vasp	-4.6378	-4.67919	0.0413888	VASP_strain_mp-1008923_1x1x1_-0.01.vasp	-4.6378	-4.5235	0.114305
VASP_strain_mp-1217337_1x1x1_0.03.vasp	-11.5173	-11.5059	0.0113581	VASP_strain_mp-1217337_1x1x1_0.03.vasp	-11.5173	-11.3376	0.179712
VASP_strain_mp-866289_1x1x1_0.05.vasp	-3.9638	-3.92154	0.0422565	VASP_strain_mp-866289_1x1x1_0.05.vasp	-3.9638	-3.83098	0.132816
VASP_strain_mp-1187194_1x1x1_0.03.vasp	-11.1683	-11.0286	0.139721	VASP_strain_mp-1187194_1x1x1_0.03.vasp	-11.1683	-11.0814	0.0869029
VASP_strain_mp-1096300_1x1x1_-0.03.vasp	-2.65736	-2.64713	0.0102263	VASP_strain_mp-1096300_1x1x1_-0.03.vasp	-2.65736	-2.67913	0.0217705
VASP_strain_mp-714885_1x1x1_0.04.vasp	-8.32385	-8.33616	0.0123007	VASP_strain_mp-714885_1x1x1_0.04.vasp	-8.32385	-8.2926	0.0312553
VASP_strain_mp-1093570_1x1x1_-0.01.vasp	-3.74422	-3.72946	0.0147556	VASP_strain_mp-1093570_1x1x1_-0.01.vasp	-3.74422	-3.70627	0.0379551
VASP_strain_mp-982637_1x1x1_0.01.vasp	-1.2775	-1.3016	0.0240976	VASP_strain_mp-982637_1x1x1_0.01.vasp	-1.2775	-1.28137	0.00386967
VASP_strain_mp-973250_1x1x1_-0.03.vasp	-3.50597	-3.53007	0.024098	VASP_strain_mp-973250_1x1x1_-0.03.vasp	-3.50597	-3.49542	0.0105499
VASP_strain_mp-24151_1x1x1_-0.05.vasp	-4.44175	-4.52253	0.0807794	VASP_strain_mp-24151_1x1x1_-0.05.vasp	-4.44175	-4.47165	0.0299021
VASP_strain_mp-863696_1x1x1_0.04.vasp	-4.35349	-4.30671	0.0467797	VASP_strain_mp-863696_1x1x1_0.04.vasp	-4.35349	-4.31348	0.040013
VASP_strain_mp-1222701_1x1x1_-0.05.vasp	-6.42625	-6.5084	0.0821512	VASP_strain_mp-1222701_1x1x1_-0.05.vasp	-6.42625	-6.47878	0.0525334
VASP_strain_mp-974739_1x1x1_0.01.vasp	-1.20409	-1.26438	0.0602858	VASP_strain_mp-974739_1x1x1_0.01.vasp	-1.20409	-1.31099	0.106905
VASP_strain_mp-1184578_1x1x1_-0.05.vasp	-4.6719	-4.75539	0.0834961	VASP_strain_mp-1184578_1x1x1_-0.05.vasp	-4.6719	-4.8009	0.129001
VASP_strain_mp-1183786_1x1x1_-0.01.vasp	-7.17903	-7.20665	0.0276209	VASP_strain_mp-1183786_1x1x1_-0.01.vasp	-7.17903	-7.1983	0.0192688
VASP_strain_mp-1096567_1x1x1_0.04.vasp	-3.63235	-3.6752	0.042845	VASP_strain_mp-1096567_1x1x1_0.04.vasp	-3.63235	-3.60909	0.0232656
VASP_strain_mp-644385_1x1x1_-0.05.vasp	-6.66444	-6.64046	0.0239797	VASP_strain_mp-644385_1x1x1_-0.05.vasp	-6.66444	-6.74888	0.084433
VASP_strain_mp-1096578_1x1x1_0.05.vasp	-2.01342	-2.00286	0.0105598	VASP_strain_mp-1096578_1x1x1_0.05.vasp	-2.01342	-2.01746	0.0040423
VASP_strain_mp-20864_1x1x1_0.02.vasp	-6.05972	-6.00302	0.0567001	VASP_strain_mp-20864_1x1x1_0.02.vasp	-6.05972	-5.97789	0.0818297
VASP_strain_mp-21214_1x1x1_-0.02.vasp	-3.85805	-3.86012	0.00207377	VASP_strain_mp-21214_1x1x1_-0.02.vasp	-3.85805	-3.88049	0.0224372
VASP_strain_mp-1096301_1x1x1_0.01.vasp	-1.99132	-2.03185	0.0405355	VASP_strain_mp-1096301_1x1x1_0.01.vasp	-1.99132	-1.96969	0.0216224
VASP_strain_mp-1186761_1x1x1_0.03.vasp	-11.5494	-11.3983	0.151076	VASP_strain_mp-1186761_1x1x1_0.03.vasp	-11.5494	-11.3759	0.173484

## Sheet: Single site-vacancies
structure	DFT Total energy/atom	DIEP Total energy/atom	DIEP Abs(error)	structure	DFT Total energy/atom	M3GNET Total energy/atom	M3GNET Abs(error)
VASP_vacancy_mp-1002165_2x2x1_remove_5.vasp	-5.40851	-5.57401	0.165504	VASP_vacancy_mp-1002165_2x2x1_remove_5.vasp	-5.40851	-5.54902	0.140507
VASP_vacancy_mp-1006880_2x2x1_remove_4.vasp	-4.33093	-4.33904	0.00811258	VASP_vacancy_mp-1006880_2x2x1_remove_4.vasp	-4.33093	-4.26273	0.0682047
VASP_vacancy_mp-1007692_2x2x1_remove_2.vasp	-7.96238	-8.01621	0.0538232	VASP_vacancy_mp-1007692_2x2x1_remove_2.vasp	-7.96238	-7.92061	0.0417716
VASP_vacancy_mp-1007853_2x2x1_remove_1.vasp	-7.38381	-7.36639	0.0174268	VASP_vacancy_mp-1007853_2x2x1_remove_1.vasp	-7.38381	-7.28607	0.097742
VASP_vacancy_mp-1007900_2x2x1_remove_3.vasp	-5.72903	-5.66832	0.0607112	VASP_vacancy_mp-1007900_2x2x1_remove_3.vasp	-5.72903	-5.82491	0.095877
VASP_vacancy_mp-1008923_2x2x1_remove_3.vasp	-4.58166	-4.6147	0.0330343	VASP_vacancy_mp-1008923_2x2x1_remove_3.vasp	-4.58166	-4.49859	0.0830767
VASP_vacancy_mp-1009822_2x2x1_remove_5.vasp	-4.99317	-5.18696	0.19379	VASP_vacancy_mp-1009822_2x2x1_remove_5.vasp	-4.99317	-5.22214	0.228961
VASP_vacancy_mp-1013526_2x2x1_remove_2.vasp	-5.94233	-6.04728	0.104953	VASP_vacancy_mp-1013526_2x2x1_remove_2.vasp	-5.94233	-6.03342	0.0910958
VASP_vacancy_mp-1014214_2x2x1_remove_5.vasp	-7.90248	-8.53635	0.633861	VASP_vacancy_mp-1014214_2x2x1_remove_5.vasp	-7.90248	-8.34196	0.439476
VASP_vacancy_mp-1018022_2x2x1_remove_1.vasp	-5.50986	-5.54778	0.0379153	VASP_vacancy_mp-1018022_2x2x1_remove_1.vasp	-5.50986	-5.66573	0.155867
VASP_vacancy_mp-1018027_2x2x1_remove_5.vasp	-9.54507	-9.37834	0.166723	VASP_vacancy_mp-1018027_2x2x1_remove_5.vasp	-9.54507	-9.34128	0.203784
VASP_vacancy_mp-1018085_2x2x1_remove_8.vasp	-6.41264	-6.31556	0.0970812	VASP_vacancy_mp-1018085_2x2x1_remove_8.vasp	-6.41264	-6.3207	0.0919414
VASP_vacancy_mp-1038715_2x2x1_remove_5.vasp	-3.84235	-3.82779	0.0145535	VASP_vacancy_mp-1038715_2x2x1_remove_5.vasp	-3.84235	-3.87771	0.0353604
VASP_vacancy_mp-1057315_2x2x1_remove_3.vasp	-10.1023	-10.0891	0.0132456	VASP_vacancy_mp-1057315_2x2x1_remove_3.vasp	-10.1023	-10.1005	0.0018663
VASP_vacancy_mp-1062643_2x2x1_remove_0.vasp	-5.81351	-5.99919	0.185676	VASP_vacancy_mp-1062643_2x2x1_remove_0.vasp	-5.81351	-5.71172	0.101792
VASP_vacancy_mp-1063522_2x2x1_remove_1.vasp	-5.69474	-5.66206	0.0326796	VASP_vacancy_mp-1063522_2x2x1_remove_1.vasp	-5.69474	-5.70923	0.0144852
VASP_vacancy_mp-1063927_2x2x1_remove_5.vasp	-5.7144	-5.74104	0.026644	VASP_vacancy_mp-1063927_2x2x1_remove_5.vasp	-5.7144	-5.75864	0.0442493
VASP_vacancy_mp-1065146_2x2x1_remove_0.vasp	-6.78459	-6.68311	0.101479	VASP_vacancy_mp-1065146_2x2x1_remove_0.vasp	-6.78459	-6.75892	0.025675
VASP_vacancy_mp-1065301_2x2x1_remove_11.vasp	-4.26186	-4.29533	0.0334614	VASP_vacancy_mp-1065301_2x2x1_remove_11.vasp	-4.26186	-4.26704	0.00517663
VASP_vacancy_mp-1065697_2x2x1_remove_0.vasp	-3.06769	-3.13093	0.0632386	VASP_vacancy_mp-1065697_2x2x1_remove_0.vasp	-3.06769	-3.07582	0.00812809
VASP_vacancy_mp-1076927_2x2x1_remove_2.vasp	-4.01081	-4.02314	0.012327	VASP_vacancy_mp-1076927_2x2x1_remove_2.vasp	-4.01081	-3.98594	0.0248698
VASP_vacancy_mp-1076927_2x2x1_remove_8.vasp	-4.13368	-4.13542	0.00174093	VASP_vacancy_mp-1076927_2x2x1_remove_8.vasp	-4.13368	-4.11395	0.0197283
VASP_vacancy_mp-1093626_2x2x1_remove_3.vasp	-1.53928	-1.63019	0.0909099	VASP_vacancy_mp-1093626_2x2x1_remove_3.vasp	-1.53928	-1.6241	0.0848196
VASP_vacancy_mp-1093642_2x2x1_remove_2.vasp	-3.91268	-3.96897	0.0562959	VASP_vacancy_mp-1093642_2x2x1_remove_2.vasp	-3.91268	-3.96872	0.0560395
VASP_vacancy_mp-1094665_2x2x1_remove_10.vasp	-1.57412	-1.57563	0.00151045	VASP_vacancy_mp-1094665_2x2x1_remove_10.vasp	-1.57412	-1.58617	0.0120413
VASP_vacancy_mp-1095876_2x2x1_remove_12.vasp	-0.215266	-0.198823	0.0164429	VASP_vacancy_mp-1095876_2x2x1_remove_12.vasp	-0.215266	-0.169696	0.0455705
VASP_vacancy_mp-1095881_2x2x1_remove_15.vasp	-0.24125	-0.210164	0.0310862	VASP_vacancy_mp-1095881_2x2x1_remove_15.vasp	-0.24125	-0.2452	0.00394972
VASP_vacancy_mp-1095970_2x2x1_remove_12.vasp	-3.27643	-3.377	0.100571	VASP_vacancy_mp-1095970_2x2x1_remove_12.vasp	-3.27643	-3.2362	0.0402275
VASP_vacancy_mp-1096401_2x2x1_remove_4.vasp	-2.09001	-2.11416	0.0241503	VASP_vacancy_mp-1096401_2x2x1_remove_4.vasp	-2.09001	-2.07961	0.0104043
VASP_vacancy_mp-1096692_2x2x1_remove_15.vasp	-0.523071	-0.49382	0.029251	VASP_vacancy_mp-1096692_2x2x1_remove_15.vasp	-0.523071	-0.534869	0.0117977
VASP_vacancy_mp-1096703_2x2x1_remove_7.vasp	-1.17633	-1.17742	0.00109867	VASP_vacancy_mp-1096703_2x2x1_remove_7.vasp	-1.17633	-1.19785	0.0215205
VASP_vacancy_mp-1097088_2x2x1_remove_3.vasp	-1.90643	-1.9881	0.0816676	VASP_vacancy_mp-1097088_2x2x1_remove_3.vasp	-1.90643	-2.0005	0.0940712
VASP_vacancy_mp-1097458_2x2x1_remove_8.vasp	-2.77456	-2.7723	0.00225473	VASP_vacancy_mp-1097458_2x2x1_remove_8.vasp	-2.77456	-2.74381	0.0307537
VASP_vacancy_mp-1097515_2x2x1_remove_0.vasp	-1.57703	-1.61332	0.0362924	VASP_vacancy_mp-1097515_2x2x1_remove_0.vasp	-1.57703	-1.62085	0.0438177
VASP_vacancy_mp-1097832_2x2x1_remove_5.vasp	-6.26766	-6.4782	0.210539	VASP_vacancy_mp-1097832_2x2x1_remove_5.vasp	-6.26766	-6.62403	0.356366
VASP_vacancy_mp-1097884_2x2x1_remove_4.vasp	-5.19231	-5.28645	0.0941445	VASP_vacancy_mp-1097884_2x2x1_remove_4.vasp	-5.19231	-5.50768	0.315369
VASP_vacancy_mp-11_2x2x1_remove_2.vasp	-4.42539	-4.47956	0.0541712	VASP_vacancy_mp-11_2x2x1_remove_2.vasp	-4.42539	-4.41511	0.010286
VASP_vacancy_mp-1100392_2x2x1_remove_2.vasp	-4.99903	-4.86117	0.137866	VASP_vacancy_mp-1100392_2x2x1_remove_2.vasp	-4.99903	-4.85906	0.139969
VASP_vacancy_mp-11472_2x2x1_remove_8.vasp	-1.1751	-1.16809	0.00701622	VASP_vacancy_mp-11472_2x2x1_remove_8.vasp	-1.1751	-1.17184	0.00326229
VASP_vacancy_mp-1178345_2x2x1_remove_2.vasp	-6.73068	-7.04663	0.315942	VASP_vacancy_mp-1178345_2x2x1_remove_2.vasp	-6.73068	-6.81298	0.0822944
VASP_vacancy_mp-1179274_2x2x1_remove_15.vasp	-3.36124	-3.40018	0.03894	VASP_vacancy_mp-1179274_2x2x1_remove_15.vasp	-3.36124	-3.43642	0.0751807
VASP_vacancy_mp-1181952_2x2x1_remove_8.vasp	-5.80951	-5.94838	0.138872	VASP_vacancy_mp-1181952_2x2x1_remove_8.vasp	-5.80951	-5.91155	0.102041
VASP_vacancy_mp-1183129_2x2x1_remove_14.vasp	-3.79037	-3.82317	0.032803	VASP_vacancy_mp-1183129_2x2x1_remove_14.vasp	-3.79037	-3.71839	0.0719843
VASP_vacancy_mp-1183175_2x2x1_remove_15.vasp	-4.54702	-4.54347	0.00354897	VASP_vacancy_mp-1183175_2x2x1_remove_15.vasp	-4.54702	-4.56624	0.0192172
VASP_vacancy_mp-1183200_2x2x1_remove_10.vasp	-3.59915	-3.59705	0.00209359	VASP_vacancy_mp-1183200_2x2x1_remove_10.vasp	-3.59915	-3.57852	0.0206305
VASP_vacancy_mp-1183299_2x2x1_remove_1.vasp	-1.88956	-1.82617	0.0633931	VASP_vacancy_mp-1183299_2x2x1_remove_1.vasp	-1.88956	-1.86056	0.0290041
VASP_vacancy_mp-1183550_2x2x1_remove_12.vasp	-5.68876	-5.70457	0.0158114	VASP_vacancy_mp-1183550_2x2x1_remove_12.vasp	-5.68876	-5.71664	0.027873
VASP_vacancy_mp-1183613_2x2x1_remove_1.vasp	-5.06045	-5.07894	0.0184908	VASP_vacancy_mp-1183613_2x2x1_remove_1.vasp	-5.06045	-5.08806	0.0276087
VASP_vacancy_mp-1183683_2x2x1_remove_14.vasp	-5.76563	-5.69817	0.0674599	VASP_vacancy_mp-1183683_2x2x1_remove_14.vasp	-5.76563	-5.90915	0.143521
VASP_vacancy_mp-1184131_2x2x1_remove_4.vasp	-5.93137	-5.95849	0.0271171	VASP_vacancy_mp-1184131_2x2x1_remove_4.vasp	-5.93137	-5.94117	0.00979559
VASP_vacancy_mp-1184323_2x2x1_remove_8.vasp	-9.21313	-9.20502	0.00810396	VASP_vacancy_mp-1184323_2x2x1_remove_8.vasp	-9.21313	-9.13459	0.078533
VASP_vacancy_mp-1184366_2x2x1_remove_11.vasp	-3.8784	-3.89715	0.0187449	VASP_vacancy_mp-1184366_2x2x1_remove_11.vasp	-3.8784	-3.87433	0.00407213
VASP_vacancy_mp-1184452_2x2x1_remove_8.vasp	-5.84407	-4.52265	1.32142	VASP_vacancy_mp-1184452_2x2x1_remove_8.vasp	-5.84407	-4.59102	1.25305
VASP_vacancy_mp-1184490_2x2x1_remove_1.vasp	-2.95983	-2.98463	0.024794	VASP_vacancy_mp-1184490_2x2x1_remove_1.vasp	-2.95983	-2.96115	0.00131439
VASP_vacancy_mp-1184493_2x2x1_remove_4.vasp	-2.54111	-2.58574	0.044633	VASP_vacancy_mp-1184493_2x2x1_remove_4.vasp	-2.54111	-2.55555	0.0144372
VASP_vacancy_mp-1184575_2x2x1_remove_12.vasp	-4.37811	-4.42821	0.0501049	VASP_vacancy_mp-1184575_2x2x1_remove_12.vasp	-4.37811	-4.40226	0.02415
VASP_vacancy_mp-1184837_2x2x1_remove_10.vasp	-3.52657	-3.56778	0.0412052	VASP_vacancy_mp-1184837_2x2x1_remove_10.vasp	-3.52657	-3.56013	0.0335587
VASP_vacancy_mp-1184925_2x2x1_remove_9.vasp	-2.58677	-2.5292	0.0575718	VASP_vacancy_mp-1184925_2x2x1_remove_9.vasp	-2.58677	-2.50383	0.0829472
VASP_vacancy_mp-1184929_2x2x1_remove_0.vasp	-3.31924	-3.36221	0.0429704	VASP_vacancy_mp-1184929_2x2x1_remove_0.vasp	-3.31924	-3.31313	0.00610971
VASP_vacancy_mp-1185000_2x2x1_remove_13.vasp	-1.79144	-1.87735	0.085914	VASP_vacancy_mp-1185000_2x2x1_remove_13.vasp	-1.79144	-1.85112	0.0596811
VASP_vacancy_mp-1185059_2x2x1_remove_5.vasp	-2.10871	-2.11879	0.0100801	VASP_vacancy_mp-1185059_2x2x1_remove_5.vasp	-2.10871	-2.07124	0.0374741
VASP_vacancy_mp-1185183_2x2x1_remove_1.vasp	-2.97416	-3.00231	0.0281525	VASP_vacancy_mp-1185183_2x2x1_remove_1.vasp	-2.97416	-2.98871	0.0145526
VASP_vacancy_mp-1185190_2x2x1_remove_5.vasp	-2.25682	-2.29104	0.0342179	VASP_vacancy_mp-1185190_2x2x1_remove_5.vasp	-2.25682	-2.25798	0.00116094
VASP_vacancy_mp-1185290_2x2x1_remove_10.vasp	-4.29104	-4.2912	0.000166838	VASP_vacancy_mp-1185290_2x2x1_remove_10.vasp	-4.29104	-4.27595	0.0150862
VASP_vacancy_mp-1185403_2x2x1_remove_1.vasp	-3.96409	-3.92145	0.0426436	VASP_vacancy_mp-1185403_2x2x1_remove_1.vasp	-3.96409	-3.9234	0.0406956
VASP_vacancy_mp-1185421_2x2x1_remove_8.vasp	-3.46354	-3.45986	0.00367244	VASP_vacancy_mp-1185421_2x2x1_remove_8.vasp	-3.46354	-3.46537	0.00183508
VASP_vacancy_mp-1185815_2x2x1_remove_7.vasp	-3.49718	-3.45276	0.0444148	VASP_vacancy_mp-1185815_2x2x1_remove_7.vasp	-3.49718	-3.48513	0.0120482
VASP_vacancy_mp-1186032_2x2x1_remove_3.vasp	-1.36639	-1.4026	0.0362104	VASP_vacancy_mp-1186032_2x2x1_remove_3.vasp	-1.36639	-1.36373	0.00266124
VASP_vacancy_mp-1186050_2x2x1_remove_10.vasp	-1.13691	-1.18273	0.0458222	VASP_vacancy_mp-1186050_2x2x1_remove_10.vasp	-1.13691	-1.16376	0.026846
VASP_vacancy_mp-1186068_2x2x1_remove_9.vasp	-2.16572	-2.13386	0.0318531	VASP_vacancy_mp-1186068_2x2x1_remove_9.vasp	-2.16572	-2.1545	0.0112135
VASP_vacancy_mp-1186083_2x2x1_remove_12.vasp	-1.67017	-1.71291	0.0427414	VASP_vacancy_mp-1186083_2x2x1_remove_12.vasp	-1.67017	-1.66549	0.00467842
VASP_vacancy_mp-1186188_2x2x1_remove_9.vasp	-1.19106	-1.17906	0.0120003	VASP_vacancy_mp-1186188_2x2x1_remove_9.vasp	-1.19106	-1.14812	0.0429433
VASP_vacancy_mp-1186354_2x2x1_remove_8.vasp	-7.9796	-7.96786	0.0117351	VASP_vacancy_mp-1186354_2x2x1_remove_8.vasp	-7.9796	-8.05074	0.0711385
VASP_vacancy_mp-1186445_2x2x1_remove_15.vasp	-4.22596	-4.24237	0.0164022	VASP_vacancy_mp-1186445_2x2x1_remove_15.vasp	-4.22596	-4.19774	0.0282256
VASP_vacancy_mp-1186606_2x2x1_remove_14.vasp	-4.01203	-4.01576	0.00373339	VASP_vacancy_mp-1186606_2x2x1_remove_14.vasp	-4.01203	-4.01152	0.000506784
VASP_vacancy_mp-1187036_2x2x1_remove_0.vasp	-4.92473	-5.01918	0.0944555	VASP_vacancy_mp-1187036_2x2x1_remove_0.vasp	-4.92473	-4.92698	0.00224818
VASP_vacancy_mp-1187149_2x2x1_remove_12.vasp	-2.27217	-2.34408	0.0719083	VASP_vacancy_mp-1187149_2x2x1_remove_12.vasp	-2.27217	-2.2941	0.0219316
VASP_vacancy_mp-1187430_2x2x1_remove_11.vasp	-9.09155	-8.99193	0.0996215	VASP_vacancy_mp-1187430_2x2x1_remove_11.vasp	-9.09155	-8.9743	0.117252
VASP_vacancy_mp-1187575_2x2x1_remove_0.vasp	-5.68723	-5.65845	0.0287797	VASP_vacancy_mp-1187575_2x2x1_remove_0.vasp	-5.68723	-5.64077	0.0464583
VASP_vacancy_mp-1187598_2x2x1_remove_12.vasp	-2.99459	-3.05195	0.0573641	VASP_vacancy_mp-1187598_2x2x1_remove_12.vasp	-2.99459	-3.03064	0.0360559
VASP_vacancy_mp-1187812_2x2x1_remove_7.vasp	-1.05783	-1.0619	0.00407057	VASP_vacancy_mp-1187812_2x2x1_remove_7.vasp	-1.05783	-1.08641	0.0285731
VASP_vacancy_mp-1187974_2x2x1_remove_2.vasp	-1.97228	-2.02147	0.049182	VASP_vacancy_mp-1187974_2x2x1_remove_2.vasp	-1.97228	-2.04964	0.0773581
VASP_vacancy_mp-11947_2x2x1_remove_15.vasp	-2.97921	-2.96619	0.0130202	VASP_vacancy_mp-11947_2x2x1_remove_15.vasp	-2.97921	-2.9926	0.0133891
VASP_vacancy_mp-1199_2x2x1_remove_3.vasp	-2.69939	-2.72315	0.0237648	VASP_vacancy_mp-1199_2x2x1_remove_3.vasp	-2.69939	-2.67172	0.0276717
VASP_vacancy_mp-1206697_2x2x1_remove_11.vasp	-7.95811	-8.09233	0.134219	VASP_vacancy_mp-1206697_2x2x1_remove_11.vasp	-7.95811	-8.07958	0.121473
VASP_vacancy_mp-1207174_2x2x1_remove_5.vasp	-3.44535	-3.51222	0.0668733	VASP_vacancy_mp-1207174_2x2x1_remove_5.vasp	-3.44535	-3.51432	0.0689718
VASP_vacancy_mp-1208943_2x2x1_remove_11.vasp	-6.63876	-6.7309	0.0921367	VASP_vacancy_mp-1208943_2x2x1_remove_11.vasp	-6.63876	-6.47839	0.160373
VASP_vacancy_mp-1216535_2x2x1_remove_2.vasp	-4.64348	-4.68053	0.0370556	VASP_vacancy_mp-1216535_2x2x1_remove_2.vasp	-4.64348	-4.64105	0.00242736
VASP_vacancy_mp-1218273_2x2x1_remove_11.vasp	-3.47778	-3.53379	0.0560097	VASP_vacancy_mp-1218273_2x2x1_remove_11.vasp	-3.47778	-3.55001	0.0722285
VASP_vacancy_mp-1218279_2x2x1_remove_0.vasp	-6.86794	-6.87817	0.0102292	VASP_vacancy_mp-1218279_2x2x1_remove_0.vasp	-6.86794	-6.78424	0.0836967
VASP_vacancy_mp-1218915_2x2x1_remove_5.vasp	-3.66521	-3.71578	0.0505706	VASP_vacancy_mp-1218915_2x2x1_remove_5.vasp	-3.66521	-3.66827	0.00305804
VASP_vacancy_mp-1218995_2x2x1_remove_14.vasp	-5.76875	-5.74528	0.0234701	VASP_vacancy_mp-1218995_2x2x1_remove_14.vasp	-5.76875	-5.76559	0.00315829
VASP_vacancy_mp-1219535_2x2x1_remove_11.vasp	-9.74569	-9.75543	0.00973365	VASP_vacancy_mp-1219535_2x2x1_remove_11.vasp	-9.74569	-9.73636	0.00933332
VASP_vacancy_mp-1219716_2x2x1_remove_14.vasp	-4.61262	-4.66633	0.053712	VASP_vacancy_mp-1219716_2x2x1_remove_14.vasp	-4.61262	-4.64507	0.0324502
VASP_vacancy_mp-1221531_2x2x1_remove_6.vasp	-6.20207	-6.21901	0.0169331	VASP_vacancy_mp-1221531_2x2x1_remove_6.vasp	-6.20207	-6.16351	0.0385615
VASP_vacancy_mp-1221550_2x2x1_remove_7.vasp	-8.75342	-8.51724	0.236184	VASP_vacancy_mp-1221550_2x2x1_remove_7.vasp	-8.75342	-8.48711	0.266313
VASP_vacancy_mp-1221642_2x2x1_remove_1.vasp	-6.05893	-6.05538	0.00355455	VASP_vacancy_mp-1221642_2x2x1_remove_1.vasp	-6.05893	-6.06171	0.0027815
VASP_vacancy_mp-1221851_2x2x1_remove_15.vasp	-7.64081	-7.53866	0.10215	VASP_vacancy_mp-1221851_2x2x1_remove_15.vasp	-7.64081	-7.49629	0.14452
VASP_vacancy_mp-1221948_2x2x1_remove_2.vasp	-7.47252	-7.3659	0.106613	VASP_vacancy_mp-1221948_2x2x1_remove_2.vasp	-7.47252	-7.33525	0.137261
VASP_vacancy_mp-1222602_2x2x1_remove_10.vasp	-3.40727	-3.4435	0.0362338	VASP_vacancy_mp-1222602_2x2x1_remove_10.vasp	-3.40727	-3.40157	0.0057011
VASP_vacancy_mp-1224988_2x2x1_remove_12.vasp	-4.01838	-4.0395	0.0211223	VASP_vacancy_mp-1224988_2x2x1_remove_12.vasp	-4.01838	-4.03385	0.0154722
VASP_vacancy_mp-1225717_2x2x1_remove_8.vasp	-4.40852	-4.44083	0.0323155	VASP_vacancy_mp-1225717_2x2x1_remove_8.vasp	-4.40852	-4.36643	0.0420847
VASP_vacancy_mp-1225764_2x2x1_remove_13.vasp	-9.51841	-9.42212	0.0962969	VASP_vacancy_mp-1225764_2x2x1_remove_13.vasp	-9.51841	-9.67323	0.154817
VASP_vacancy_mp-1226878_2x2x1_remove_8.vasp	-0.555265	-0.588436	0.0331707	VASP_vacancy_mp-1226878_2x2x1_remove_8.vasp	-0.555265	-0.580307	0.025042
VASP_vacancy_mp-1228623_2x2x1_remove_3.vasp	-7.07821	-7.58046	0.502249	VASP_vacancy_mp-1228623_2x2x1_remove_3.vasp	-7.07821	-7.55729	0.479078
VASP_vacancy_mp-1245858_2x2x1_remove_10.vasp	-8.18159	-8.35701	0.175416	VASP_vacancy_mp-1245858_2x2x1_remove_10.vasp	-8.18159	-8.03628	0.145311
VASP_vacancy_mp-1269_2x2x1_remove_4.vasp	-6.15377	-6.13109	0.0226801	VASP_vacancy_mp-1269_2x2x1_remove_4.vasp	-6.15377	-6.12368	0.0300925
VASP_vacancy_mp-1282494_2x2x1_remove_5.vasp	-7.16725	-7.45769	0.290439	VASP_vacancy_mp-1282494_2x2x1_remove_5.vasp	-7.16725	-7.26548	0.098236
VASP_vacancy_mp-13117_2x2x1_remove_7.vasp	-4.83909	-5.03857	0.199472	VASP_vacancy_mp-13117_2x2x1_remove_7.vasp	-4.83909	-4.90475	0.0656534
VASP_vacancy_mp-16268_2x2x1_remove_10.vasp	-3.67004	-3.84833	0.17829	VASP_vacancy_mp-16268_2x2x1_remove_10.vasp	-3.67004	-3.86567	0.195633
VASP_vacancy_mp-20311_2x2x1_remove_6.vasp	-5.98627	-5.80606	0.180212	VASP_vacancy_mp-20311_2x2x1_remove_6.vasp	-5.98627	-5.79517	0.191096
VASP_vacancy_mp-20534_2x2x1_remove_5.vasp	-2.35744	-2.40882	0.0513796	VASP_vacancy_mp-20534_2x2x1_remove_5.vasp	-2.35744	-2.40626	0.0488191
VASP_vacancy_mp-20724_2x2x1_remove_10.vasp	-1.98662	-1.96971	0.0169066	VASP_vacancy_mp-20724_2x2x1_remove_10.vasp	-1.98662	-1.92511	0.061508
VASP_vacancy_mp-22680_2x2x1_remove_15.vasp	-3.97726	-3.95296	0.0243044	VASP_vacancy_mp-22680_2x2x1_remove_15.vasp	-3.97726	-3.98175	0.00448504
VASP_vacancy_mp-23201_2x2x1_remove_10.vasp	-3.82925	-3.94456	0.115309	VASP_vacancy_mp-23201_2x2x1_remove_10.vasp	-3.82925	-3.76373	0.0655187
VASP_vacancy_mp-2323_2x2x1_remove_0.vasp	-3.71913	-3.6613	0.0578311	VASP_vacancy_mp-2323_2x2x1_remove_0.vasp	-3.71913	-3.70602	0.0131163
VASP_vacancy_mp-2583_2x2x1_remove_5.vasp	-7.99989	-8.0087	0.0088062	VASP_vacancy_mp-2583_2x2x1_remove_5.vasp	-7.99989	-7.95815	0.0417398
VASP_vacancy_mp-280_2x2x1_remove_4.vasp	-11.9349	-11.9048	0.0300665	VASP_vacancy_mp-280_2x2x1_remove_4.vasp	-11.9349	-11.9746	0.0396963
VASP_vacancy_mp-28233_2x2x1_remove_5.vasp	-5.32825	-5.53021	0.201957	VASP_vacancy_mp-28233_2x2x1_remove_5.vasp	-5.32825	-5.34571	0.0174526
VASP_vacancy_mp-28910_2x2x1_remove_4.vasp	-6.59851	-6.49113	0.107379	VASP_vacancy_mp-28910_2x2x1_remove_4.vasp	-6.59851	-6.69739	0.0988834
VASP_vacancy_mp-30080_2x2x1_remove_6.vasp	-3.86235	-3.87047	0.00811951	VASP_vacancy_mp-30080_2x2x1_remove_6.vasp	-3.86235	-3.8744	0.0120477
VASP_vacancy_mp-30551_2x2x1_remove_8.vasp	-6.42849	-6.3171	0.111391	VASP_vacancy_mp-30551_2x2x1_remove_8.vasp	-6.42849	-6.30907	0.119416
VASP_vacancy_mp-31498_2x2x1_remove_11.vasp	-4.55029	-4.58643	0.0361454	VASP_vacancy_mp-31498_2x2x1_remove_11.vasp	-4.55029	-4.77593	0.225649
VASP_vacancy_mp-348_2x2x1_remove_5.vasp	-5.50755	-5.54807	0.0405213	VASP_vacancy_mp-348_2x2x1_remove_5.vasp	-5.50755	-5.60642	0.0988756
VASP_vacancy_mp-35695_2x2x1_remove_14.vasp	-3.94364	-4.15837	0.214731	VASP_vacancy_mp-35695_2x2x1_remove_14.vasp	-3.94364	-4.09542	0.151779
VASP_vacancy_mp-4536_2x2x1_remove_5.vasp	-5.82257	-5.81993	0.00264189	VASP_vacancy_mp-4536_2x2x1_remove_5.vasp	-5.82257	-5.83222	0.00964262
VASP_vacancy_mp-526_2x2x1_remove_4.vasp	-2.35897	-2.39642	0.037444	VASP_vacancy_mp-526_2x2x1_remove_4.vasp	-2.35897	-2.33033	0.0286429
VASP_vacancy_mp-542595_2x2x1_remove_4.vasp	-7.35068	-7.46422	0.113542	VASP_vacancy_mp-542595_2x2x1_remove_4.vasp	-7.35068	-7.22096	0.129727
VASP_vacancy_mp-567903_2x2x1_remove_3.vasp	-2.86264	-2.83807	0.024573	VASP_vacancy_mp-567903_2x2x1_remove_3.vasp	-2.86264	-2.7663	0.0963446
VASP_vacancy_mp-568273_2x2x1_remove_13.vasp	-2.7823	-2.76196	0.0203471	VASP_vacancy_mp-568273_2x2x1_remove_13.vasp	-2.7823	-2.86392	0.081619
VASP_vacancy_mp-58_2x2x1_remove_3.vasp	-0.939549	-0.885834	0.0537148	VASP_vacancy_mp-58_2x2x1_remove_3.vasp	-0.939549	-0.832713	0.106836
VASP_vacancy_mp-600124_2x2x1_remove_9.vasp	-6.26665	-6.36049	0.0938409	VASP_vacancy_mp-600124_2x2x1_remove_9.vasp	-6.26665	-6.23705	0.0295918
VASP_vacancy_mp-629015_2x2x1_remove_6.vasp	-8.33909	-8.76836	0.429267	VASP_vacancy_mp-629015_2x2x1_remove_6.vasp	-8.33909	-8.58179	0.242702
VASP_vacancy_mp-631312_2x2x1_remove_5.vasp	-3.9842	-4.07123	0.087028	VASP_vacancy_mp-631312_2x2x1_remove_5.vasp	-3.9842	-4.20909	0.224885
VASP_vacancy_mp-631352_2x2x1_remove_11.vasp	-7.39412	-7.27293	0.121197	VASP_vacancy_mp-631352_2x2x1_remove_11.vasp	-7.39412	-7.35342	0.0407059
VASP_vacancy_mp-631358_2x2x1_remove_13.vasp	-7.21352	-7.71744	0.503919	VASP_vacancy_mp-631358_2x2x1_remove_13.vasp	-7.21352	-7.61652	0.403001
VASP_vacancy_mp-631396_2x2x1_remove_2.vasp	-7.14726	-7.47557	0.328312	VASP_vacancy_mp-631396_2x2x1_remove_2.vasp	-7.14726	-7.49196	0.344699
VASP_vacancy_mp-631536_2x2x1_remove_2.vasp	-6.43725	-6.6055	0.168251	VASP_vacancy_mp-631536_2x2x1_remove_2.vasp	-6.43725	-6.89043	0.453181
VASP_vacancy_mp-634105_2x2x1_remove_0.vasp	-2.27173	-2.39649	0.124762	VASP_vacancy_mp-634105_2x2x1_remove_0.vasp	-2.27173	-2.27474	0.00300465
VASP_vacancy_mp-7390_2x2x1_remove_9.vasp	-3.91333	-3.78153	0.131804	VASP_vacancy_mp-7390_2x2x1_remove_9.vasp	-3.91333	-3.7789	0.134425
VASP_vacancy_mp-752924_2x2x1_remove_10.vasp	-5.41274	-5.32058	0.0921591	VASP_vacancy_mp-752924_2x2x1_remove_10.vasp	-5.41274	-5.42637	0.0136273
VASP_vacancy_mp-753287_2x2x1_remove_9.vasp	-4.91921	-4.92359	0.00438192	VASP_vacancy_mp-753287_2x2x1_remove_9.vasp	-4.91921	-5.03341	0.114206
VASP_vacancy_mp-8023_2x2x1_remove_7.vasp	-5.38065	-5.30067	0.0799849	VASP_vacancy_mp-8023_2x2x1_remove_7.vasp	-5.38065	-5.82264	0.441992
VASP_vacancy_mp-8454_2x2x1_remove_5.vasp	-3.48453	-3.95426	0.469737	VASP_vacancy_mp-8454_2x2x1_remove_5.vasp	-3.48453	-3.94879	0.464263
VASP_vacancy_mp-849098_2x2x1_remove_6.vasp	-6.10251	-6.0815	0.0210104	VASP_vacancy_mp-849098_2x2x1_remove_6.vasp	-6.10251	-6.13321	0.0307057
VASP_vacancy_mp-862340_2x2x1_remove_12.vasp	-5.28822	-5.3187	0.0304811	VASP_vacancy_mp-862340_2x2x1_remove_12.vasp	-5.28822	-5.30538	0.0171664
VASP_vacancy_mp-862371_2x2x1_remove_11.vasp	-7.73227	-7.74467	0.0124064	VASP_vacancy_mp-862371_2x2x1_remove_11.vasp	-7.73227	-7.71438	0.017883
VASP_vacancy_mp-862378_2x2x1_remove_9.vasp	-6.76675	-6.81433	0.0475822	VASP_vacancy_mp-862378_2x2x1_remove_9.vasp	-6.76675	-6.77881	0.0120547
VASP_vacancy_mp-862788_2x2x1_remove_14.vasp	-3.51048	-3.51689	0.00640259	VASP_vacancy_mp-862788_2x2x1_remove_14.vasp	-3.51048	-3.50417	0.00631252
VASP_vacancy_mp-862831_2x2x1_remove_12.vasp	-9.70363	-9.683	0.0206306	VASP_vacancy_mp-862831_2x2x1_remove_12.vasp	-9.70363	-9.62226	0.0813719
VASP_vacancy_mp-862895_2x2x1_remove_2.vasp	-5.11448	-5.08357	0.0309111	VASP_vacancy_mp-862895_2x2x1_remove_2.vasp	-5.11448	-5.06742	0.0470579
VASP_vacancy_mp-862967_2x2x1_remove_5.vasp	-5.8636	-5.86456	0.000957305	VASP_vacancy_mp-862967_2x2x1_remove_5.vasp	-5.8636	-5.86488	0.00127479
VASP_vacancy_mp-8633_2x2x1_remove_3.vasp	-8.3811	-8.50917	0.128074	VASP_vacancy_mp-8633_2x2x1_remove_3.vasp	-8.3811	-8.49069	0.109587
VASP_vacancy_mp-863714_2x2x1_remove_14.vasp	-5.81788	-5.82119	0.00331462	VASP_vacancy_mp-863714_2x2x1_remove_14.vasp	-5.81788	-5.80627	0.0116101
VASP_vacancy_mp-864607_2x2x1_remove_6.vasp	-5.70182	-5.67987	0.0219512	VASP_vacancy_mp-864607_2x2x1_remove_6.vasp	-5.70182	-5.68043	0.0213835
VASP_vacancy_mp-864640_2x2x1_remove_7.vasp	-10.7591	-10.7969	0.0377347	VASP_vacancy_mp-864640_2x2x1_remove_7.vasp	-10.7591	-10.7483	0.0108331
VASP_vacancy_mp-864660_2x2x1_remove_1.vasp	-6.43096	-6.35896	0.0720049	VASP_vacancy_mp-864660_2x2x1_remove_1.vasp	-6.43096	-6.3564	0.0745686
VASP_vacancy_mp-864716_2x2x1_remove_3.vasp	-4.69591	-4.60374	0.092165	VASP_vacancy_mp-864716_2x2x1_remove_3.vasp	-4.69591	-4.63577	0.0601369
VASP_vacancy_mp-864839_2x2x1_remove_3.vasp	-4.20606	-4.21046	0.00440179	VASP_vacancy_mp-864839_2x2x1_remove_3.vasp	-4.20606	-4.19662	0.0094358
VASP_vacancy_mp-864936_2x2x1_remove_12.vasp	-8.03956	-8.03336	0.00619382	VASP_vacancy_mp-864936_2x2x1_remove_12.vasp	-8.03956	-7.9798	0.0597563
VASP_vacancy_mp-865172_2x2x1_remove_14.vasp	-7.98036	-7.96032	0.0200359	VASP_vacancy_mp-865172_2x2x1_remove_14.vasp	-7.98036	-7.95786	0.0225016
VASP_vacancy_mp-865316_2x2x1_remove_14.vasp	-3.41854	-3.46976	0.0512192	VASP_vacancy_mp-865316_2x2x1_remove_14.vasp	-3.41854	-3.43333	0.0147901
VASP_vacancy_mp-865326_2x2x1_remove_3.vasp	-6.14748	-6.17263	0.0251452	VASP_vacancy_mp-865326_2x2x1_remove_3.vasp	-6.14748	-6.16653	0.0190507
VASP_vacancy_mp-865380_2x2x1_remove_3.vasp	-6.13217	-6.15586	0.0236843	VASP_vacancy_mp-865380_2x2x1_remove_3.vasp	-6.13217	-6.16388	0.0317069
VASP_vacancy_mp-865413_2x2x1_remove_15.vasp	-6.5122	-6.58896	0.0767613	VASP_vacancy_mp-865413_2x2x1_remove_15.vasp	-6.5122	-6.59243	0.0802296
VASP_vacancy_mp-865640_2x2x1_remove_10.vasp	-8.17784	-8.06808	0.109763	VASP_vacancy_mp-865640_2x2x1_remove_10.vasp	-8.17784	-7.99099	0.186859
VASP_vacancy_mp-865751_2x2x1_remove_1.vasp	-5.95739	-5.95394	0.00344915	VASP_vacancy_mp-865751_2x2x1_remove_1.vasp	-5.95739	-5.9421	0.0152854
VASP_vacancy_mp-865766_2x2x1_remove_13.vasp	-3.48186	-3.47875	0.00311405	VASP_vacancy_mp-865766_2x2x1_remove_13.vasp	-3.48186	-3.44426	0.0376
VASP_vacancy_mp-865833_2x2x1_remove_7.vasp	-2.4609	-2.47383	0.0129305	VASP_vacancy_mp-865833_2x2x1_remove_7.vasp	-2.4609	-2.4503	0.0105946
VASP_vacancy_mp-865897_2x2x1_remove_12.vasp	-2.68245	-2.7739	0.0914493	VASP_vacancy_mp-865897_2x2x1_remove_12.vasp	-2.68245	-2.75499	0.0725439
VASP_vacancy_mp-866018_2x2x1_remove_11.vasp	-4.01327	-4.01647	0.00319735	VASP_vacancy_mp-866018_2x2x1_remove_11.vasp	-4.01327	-3.98384	0.0294293
VASP_vacancy_mp-866051_2x2x1_remove_3.vasp	-7.41775	-7.43135	0.0135912	VASP_vacancy_mp-866051_2x2x1_remove_3.vasp	-7.41775	-7.33492	0.0828321
VASP_vacancy_mp-866121_2x2x1_remove_0.vasp	-9.73155	-9.59531	0.136242	VASP_vacancy_mp-866121_2x2x1_remove_0.vasp	-9.73155	-9.6699	0.0616553
VASP_vacancy_mp-867161_2x2x1_remove_0.vasp	-2.52339	-2.54172	0.0183352	VASP_vacancy_mp-867161_2x2x1_remove_0.vasp	-2.52339	-2.54786	0.0244739
VASP_vacancy_mp-867774_2x2x1_remove_15.vasp	-11.1908	-11.1268	0.0639891	VASP_vacancy_mp-867774_2x2x1_remove_15.vasp	-11.1908	-11.0647	0.126053
VASP_vacancy_mp-867922_2x2x1_remove_14.vasp	-7.03768	-7.04383	0.00615857	VASP_vacancy_mp-867922_2x2x1_remove_14.vasp	-7.03768	-7.04297	0.00529063
VASP_vacancy_mp-961675_2x2x1_remove_10.vasp	-6.45914	-6.59766	0.138513	VASP_vacancy_mp-961675_2x2x1_remove_10.vasp	-6.45914	-6.51289	0.0537514
VASP_vacancy_mp-965_2x2x1_remove_10.vasp	-6.30066	-6.46677	0.166105	VASP_vacancy_mp-965_2x2x1_remove_10.vasp	-6.30066	-6.55168	0.251014
VASP_vacancy_mp-972103_2x2x1_remove_3.vasp	-10.1414	-9.90203	0.239375	VASP_vacancy_mp-972103_2x2x1_remove_3.vasp	-10.1414	-10.0286	0.112795
VASP_vacancy_mp-972156_2x2x1_remove_0.vasp	-5.91901	-5.99333	0.074311	VASP_vacancy_mp-972156_2x2x1_remove_0.vasp	-5.91901	-5.95289	0.0338775
VASP_vacancy_mp-972422_2x2x1_remove_8.vasp	-9.45339	-9.54283	0.0894438	VASP_vacancy_mp-972422_2x2x1_remove_8.vasp	-9.45339	-9.45073	0.00265759
VASP_vacancy_mp-972520_2x2x1_remove_13.vasp	-6.36339	-6.31498	0.0484094	VASP_vacancy_mp-972520_2x2x1_remove_13.vasp	-6.36339	-6.35649	0.00690283
VASP_vacancy_mp-972914_2x2x1_remove_12.vasp	-4.77878	-4.774	0.00477995	VASP_vacancy_mp-972914_2x2x1_remove_12.vasp	-4.77878	-4.76241	0.0163686
VASP_vacancy_mp-973443_2x2x1_remove_3.vasp	-10.7421	-10.7194	0.0227114	VASP_vacancy_mp-973443_2x2x1_remove_3.vasp	-10.7421	-10.7599	0.0178135
VASP_vacancy_mp-973606_2x2x1_remove_13.vasp	-6.1569	-6.09839	0.0585162	VASP_vacancy_mp-973606_2x2x1_remove_13.vasp	-6.1569	-6.10267	0.0542344
VASP_vacancy_mp-973792_2x2x1_remove_14.vasp	-7.67833	-7.71671	0.0383779	VASP_vacancy_mp-973792_2x2x1_remove_14.vasp	-7.67833	-7.71891	0.0405853
VASP_vacancy_mp-973976_2x2x1_remove_15.vasp	-3.90045	-3.93954	0.0390886	VASP_vacancy_mp-973976_2x2x1_remove_15.vasp	-3.90045	-3.9896	0.089146
VASP_vacancy_mp-974455_2x2x1_remove_15.vasp	-11.5772	-11.549	0.0281892	VASP_vacancy_mp-974455_2x2x1_remove_15.vasp	-11.5772	-11.5353	0.0418987
VASP_vacancy_mp-974627_2x2x1_remove_6.vasp	-1.34084	-1.36558	0.0247353	VASP_vacancy_mp-974627_2x2x1_remove_6.vasp	-1.34084	-1.35532	0.0144801
VASP_vacancy_mp-974856_2x2x1_remove_6.vasp	-2.33084	-2.20687	0.123965	VASP_vacancy_mp-974856_2x2x1_remove_6.vasp	-2.33084	-2.3018	0.0290387
VASP_vacancy_mp-974949_2x2x1_remove_3.vasp	-2.23692	-2.17058	0.0663365	VASP_vacancy_mp-974949_2x2x1_remove_3.vasp	-2.23692	-2.33172	0.0947969
VASP_vacancy_mp-975256_2x2x1_remove_1.vasp	-3.4777	-3.4665	0.0112004	VASP_vacancy_mp-975256_2x2x1_remove_1.vasp	-3.4777	-3.43163	0.0460682
VASP_vacancy_mp-975786_2x2x1_remove_0.vasp	-2.86567	-2.86281	0.00285649	VASP_vacancy_mp-975786_2x2x1_remove_0.vasp	-2.86567	-2.86384	0.0018292
VASP_vacancy_mp-976148_2x2x1_remove_4.vasp	-2.20126	-2.20495	0.00369079	VASP_vacancy_mp-976148_2x2x1_remove_4.vasp	-2.20126	-2.18139	0.0198712
VASP_vacancy_mp-976150_2x2x1_remove_11.vasp	-2.90545	-3.00111	0.0956534	VASP_vacancy_mp-976150_2x2x1_remove_11.vasp	-2.90545	-2.93615	0.0306967
VASP_vacancy_mp-976421_2x2x1_remove_8.vasp	-3.77656	-3.79902	0.0224613	VASP_vacancy_mp-976421_2x2x1_remove_8.vasp	-3.77656	-3.79917	0.0226026
VASP_vacancy_mp-977224_2x2x1_remove_1.vasp	-5.02578	-4.97918	0.0466015	VASP_vacancy_mp-977224_2x2x1_remove_1.vasp	-5.02578	-5.01033	0.0154502
VASP_vacancy_mp-977314_2x2x1_remove_4.vasp	-3.20697	-3.20937	0.00240482	VASP_vacancy_mp-977314_2x2x1_remove_4.vasp	-3.20697	-3.16307	0.0439024
VASP_vacancy_mp-977443_2x2x1_remove_15.vasp	-8.33177	-8.30719	0.0245753	VASP_vacancy_mp-977443_2x2x1_remove_15.vasp	-8.33177	-8.17051	0.161265
VASP_vacancy_mp-977578_2x2x1_remove_11.vasp	-8.45403	-8.47451	0.0204812	VASP_vacancy_mp-977578_2x2x1_remove_11.vasp	-8.45403	-8.41208	0.0419541
VASP_vacancy_mp-978495_2x2x1_remove_14.vasp	-5.60962	-5.81477	0.205148	VASP_vacancy_mp-978495_2x2x1_remove_14.vasp	-5.60962	-5.81971	0.210084
VASP_vacancy_mp-978507_2x2x1_remove_5.vasp	-6.51607	-6.57617	0.0601026	VASP_vacancy_mp-978507_2x2x1_remove_5.vasp	-6.51607	-6.54424	0.0281798
VASP_vacancy_mp-978805_2x2x1_remove_14.vasp	-2.91047	-2.90514	0.00532128	VASP_vacancy_mp-978805_2x2x1_remove_14.vasp	-2.91047	-2.90852	0.00194013
VASP_vacancy_mp-978852_2x2x1_remove_9.vasp	-3.27145	-3.3032	0.0317515	VASP_vacancy_mp-978852_2x2x1_remove_9.vasp	-3.27145	-3.28001	0.00856093
VASP_vacancy_mp-978882_2x2x1_remove_0.vasp	-3.74375	-3.8008	0.0570586	VASP_vacancy_mp-978882_2x2x1_remove_0.vasp	-3.74375	-3.82854	0.0847961
VASP_vacancy_mp-980206_2x2x1_remove_14.vasp	-7.56347	-7.62346	0.0599873	VASP_vacancy_mp-980206_2x2x1_remove_14.vasp	-7.56347	-7.61264	0.0491673
VASP_vacancy_mp-982448_2x2x1_remove_3.vasp	-5.02262	-5.08109	0.0584714	VASP_vacancy_mp-982448_2x2x1_remove_3.vasp	-5.02262	-5.04274	0.0201226
VASP_vacancy_mp-983460_2x2x1_remove_0.vasp	-3.17825	-3.17773	0.00051582	VASP_vacancy_mp-983460_2x2x1_remove_0.vasp	-3.17825	-3.16932	0.00893209
VASP_vacancy_mp-985280_2x2x1_remove_13.vasp	-5.89086	-5.80895	0.0819119	VASP_vacancy_mp-985280_2x2x1_remove_13.vasp	-5.89086	-5.72322	0.167647
VASP_vacancy_mp-995195_2x2x1_remove_11.vasp	-5.84162	-5.93793	0.0963048	VASP_vacancy_mp-995195_2x2x1_remove_11.vasp	-5.84162	-5.95929	0.117664
VASP_vacancy_mp-998908_2x2x1_remove_0.vasp	-9.15024	-9.20661	0.0563751	VASP_vacancy_mp-998908_2x2x1_remove_0.vasp	-9.15024	-9.18272	0.0324857
VASP_vacancy_mp-999195_2x2x1_remove_7.vasp	-8.12338	-7.93824	0.185141	VASP_vacancy_mp-999195_2x2x1_remove_7.vasp	-8.12338	-7.84138	0.282007
VASP_vacancy_mp-999258_2x2x1_remove_3.vasp	-6.82358	-6.69557	0.128004	VASP_vacancy_mp-999258_2x2x1_remove_3.vasp	-6.82358	-6.7044	0.119174

## Sheet: Single site-substitutions
structure	DFT Total energy/atom	DIEP Total energy/atom	DIEP Abs(error)	structure	DFT Total energy/atom	M3GNET Total energy/atom	M3GNET Abs(error)
VASP_substitution_mp-1002181_2x2x1_replace_Tc_with_Mn.vasp	-9.16455	-9.12696	0.0375955	VASP_substitution_mp-1002181_2x2x1_replace_Tc_with_Mn.vasp	-9.16455	-9.006	0.158551
VASP_substitution_mp-1008733_2x2x1_replace_Ge_with_Si.vasp	-4.24737	-4.24267	0.00469525	VASP_substitution_mp-1008733_2x2x1_replace_Ge_with_Si.vasp	-4.24737	-4.252	0.00463034
VASP_substitution_mp-1008929_2x2x1_replace_N_with_Sb.vasp	-6.75212	-7.74697	0.994851	VASP_substitution_mp-1008929_2x2x1_replace_N_with_Sb.vasp	-6.75212	-7.99784	1.24572
VASP_substitution_mp-1009019_2x2x1_replace_Fe_with_Ru.vasp	-7.51154	-7.39111	0.12043	VASP_substitution_mp-1009019_2x2x1_replace_Fe_with_Ru.vasp	-7.51154	-7.54945	0.0379139
VASP_substitution_mp-1009071_2x2x1_replace_C_with_Si.vasp	-7.81838	-7.86104	0.0426521	VASP_substitution_mp-1009071_2x2x1_replace_C_with_Si.vasp	-7.81838	-7.77185	0.0465348
VASP_substitution_mp-1009694_2x2x1_replace_Re_with_Tc.vasp	-9.19972	-9.15182	0.0478991	VASP_substitution_mp-1009694_2x2x1_replace_Re_with_Tc.vasp	-9.19972	-9.10857	0.0911493
VASP_substitution_mp-10141_2x2x1_replace_B_with_Tl.vasp	-5.69789	-6.22151	0.523619	VASP_substitution_mp-10141_2x2x1_replace_B_with_Tl.vasp	-5.69789	-6.25771	0.559815
VASP_substitution_mp-1014214_2x2x1_replace_N_with_Bi.vasp	-3.98272	-5.60647	1.62375	VASP_substitution_mp-1014214_2x2x1_replace_N_with_Bi.vasp	-3.98272	-6.29552	2.3128
VASP_substitution_mp-1038961_2x2x1_replace_Ca_with_Ba.vasp	-1.61028	-1.7382	0.127919	VASP_substitution_mp-1038961_2x2x1_replace_Ca_with_Ba.vasp	-1.61028	-1.72283	0.112553
VASP_substitution_mp-1038972_2x2x1_replace_Cd_with_Zn.vasp	-1.21019	-1.19993	0.0102612	VASP_substitution_mp-1038972_2x2x1_replace_Cd_with_Zn.vasp	-1.21019	-1.1773	0.0328907
VASP_substitution_mp-1039074_2x2x1_replace_Mg_with_Sr.vasp	-2.86819	-3.066	0.197811	VASP_substitution_mp-1039074_2x2x1_replace_Mg_with_Sr.vasp	-2.86819	-3.05828	0.190093
VASP_substitution_mp-1055994_2x2x1_replace_In_with_Ga.vasp	-2.59972	-2.58512	0.0145961	VASP_substitution_mp-1055994_2x2x1_replace_In_with_Ga.vasp	-2.59972	-2.59608	0.0036446
VASP_substitution_mp-1056418_2x2x1_replace_Sr_with_Ca.vasp	-0.257158	-0.106793	0.150365	VASP_substitution_mp-1056418_2x2x1_replace_Sr_with_Ca.vasp	-0.257158	-0.0509976	0.20616
VASP_substitution_mp-1058887_2x2x1_replace_C_with_Si.vasp	-3.19049	-3.35371	0.163222	VASP_substitution_mp-1058887_2x2x1_replace_C_with_Si.vasp	-3.19049	-3.60078	0.41029
VASP_substitution_mp-1058944_2x2x1_replace_K_with_Li.vasp	-2.78532	-2.8408	0.0554842	VASP_substitution_mp-1058944_2x2x1_replace_K_with_Li.vasp	-2.78532	-2.71226	0.0730605
VASP_substitution_mp-10634_2x2x1_replace_Cu_with_Au.vasp	-3.53647	-3.45155	0.084924	VASP_substitution_mp-10634_2x2x1_replace_Cu_with_Au.vasp	-3.53647	-3.57389	0.0374155
VASP_substitution_mp-1065290_2x2x1_replace_Rh_with_Ir.vasp	-6.69122	-6.70633	0.0151038	VASP_substitution_mp-1065290_2x2x1_replace_Rh_with_Ir.vasp	-6.69122	-6.72851	0.0372824
VASP_substitution_mp-1065428_2x2x1_replace_Rb_with_K.vasp	-2.2411	-2.27532	0.0342112	VASP_substitution_mp-1065428_2x2x1_replace_Rb_with_K.vasp	-2.2411	-2.16994	0.0711602
VASP_substitution_mp-1065668_2x2x1_replace_C_with_Ge.vasp	-6.9904	-7.24244	0.252036	VASP_substitution_mp-1065668_2x2x1_replace_C_with_Ge.vasp	-6.9904	-7.29199	0.301584
VASP_substitution_mp-1067042_2x2x1_replace_Li_with_Cs.vasp	-2.37316	-2.75556	0.382396	VASP_substitution_mp-1067042_2x2x1_replace_Li_with_Cs.vasp	-2.37316	-2.72468	0.351516
VASP_substitution_mp-1083_2x2x1_replace_B_with_Tl.vasp	-7.98248	-8.89193	0.909453	VASP_substitution_mp-1083_2x2x1_replace_B_with_Tl.vasp	-7.98248	-8.87601	0.89353
VASP_substitution_mp-10903_2x2x1_replace_Al_with_B.vasp	-5.75856	-5.70446	0.0540996	VASP_substitution_mp-10903_2x2x1_replace_Al_with_B.vasp	-5.75856	-5.78308	0.0245219
VASP_substitution_mp-1093543_2x2x1_replace_Pb_with_C.vasp	-2.26988	-2.3337	0.0638266	VASP_substitution_mp-1093543_2x2x1_replace_Pb_with_C.vasp	-2.26988	-2.2193	0.0505831
VASP_substitution_mp-1093699_2x2x1_replace_Hg_with_Cd.vasp	-0.396515	-0.377938	0.0185775	VASP_substitution_mp-1093699_2x2x1_replace_Hg_with_Cd.vasp	-0.396515	-0.422116	0.0256002
VASP_substitution_mp-1093785_2x2x1_replace_Ba_with_Ca.vasp	-1.00308	-1.01952	0.0164384	VASP_substitution_mp-1093785_2x2x1_replace_Ba_with_Ca.vasp	-1.00308	-1.02885	0.0257743
VASP_substitution_mp-1093844_2x2x1_replace_Ga_with_In.vasp	-4.3381	-4.39163	0.0535364	VASP_substitution_mp-1093844_2x2x1_replace_Ga_with_In.vasp	-4.3381	-4.39166	0.0535604
VASP_substitution_mp-1093911_2x2x1_replace_Ge_with_C.vasp	-4.04219	-4.08685	0.044665	VASP_substitution_mp-1093911_2x2x1_replace_Ge_with_C.vasp	-4.04219	-4.05111	0.00892649
VASP_substitution_mp-1094232_2x2x1_replace_Sn_with_Si.vasp	-2.70733	-2.73924	0.0319097	VASP_substitution_mp-1094232_2x2x1_replace_Sn_with_Si.vasp	-2.70733	-2.73733	0.0299945
VASP_substitution_mp-1094256_2x2x1_replace_Y_with_Sc.vasp	-6.02543	-6.0335	0.00806837	VASP_substitution_mp-1094256_2x2x1_replace_Y_with_Sc.vasp	-6.02543	-5.99522	0.0302095
VASP_substitution_mp-1094513_2x2x1_replace_Sb_with_N.vasp	-3.73107	-3.79809	0.0670267	VASP_substitution_mp-1094513_2x2x1_replace_Sb_with_N.vasp	-3.73107	-3.89934	0.168274
VASP_substitution_mp-1094617_2x2x1_replace_Ga_with_Tl.vasp	-2.15979	-2.21827	0.058484	VASP_substitution_mp-1094617_2x2x1_replace_Ga_with_Tl.vasp	-2.15979	-2.24642	0.0866339
VASP_substitution_mp-1094753_2x2x1_replace_Sn_with_C.vasp	-2.84821	-2.83961	0.00859988	VASP_substitution_mp-1094753_2x2x1_replace_Sn_with_C.vasp	-2.84821	-2.90628	0.0580652
VASP_substitution_mp-1094867_2x2x1_replace_Zn_with_Cd.vasp	-1.21457	-1.25556	0.0409923	VASP_substitution_mp-1094867_2x2x1_replace_Zn_with_Cd.vasp	-1.21457	-1.2546	0.0400307
VASP_substitution_mp-1094880_2x2x1_replace_Sr_with_Mg.vasp	-1.58131	-1.56884	0.0124687	VASP_substitution_mp-1094880_2x2x1_replace_Sr_with_Mg.vasp	-1.58131	-1.52118	0.0601364
VASP_substitution_mp-1094974_2x2x1_replace_Zr_with_Ti.vasp	-4.80031	-4.77323	0.0270768	VASP_substitution_mp-1094974_2x2x1_replace_Zr_with_Ti.vasp	-4.80031	-4.72778	0.0725246
VASP_substitution_mp-1095791_2x2x1_replace_Y_with_Sc.vasp	-3.04915	-3.06283	0.0136767	VASP_substitution_mp-1095791_2x2x1_replace_Y_with_Sc.vasp	-3.04915	-3.07514	0.0259851
VASP_substitution_mp-1095853_2x2x1_replace_Y_with_Sc.vasp	-2.05587	-2.09573	0.0398659	VASP_substitution_mp-1095853_2x2x1_replace_Y_with_Sc.vasp	-2.05587	-2.07276	0.0168907
VASP_substitution_mp-1095912_2x2x1_replace_Nb_with_Ta.vasp	-5.01878	-5.05425	0.035478	VASP_substitution_mp-1095912_2x2x1_replace_Nb_with_Ta.vasp	-5.01878	-5.02442	0.00564341
VASP_substitution_mp-1096079_2x2x1_replace_Li_with_Cs.vasp	-1.70831	-1.79982	0.0915119	VASP_substitution_mp-1096079_2x2x1_replace_Li_with_Cs.vasp	-1.70831	-1.80788	0.0995711
VASP_substitution_mp-1096109_2x2x1_replace_Mn_with_Tc.vasp	-2.89224	-2.88763	0.00461783	VASP_substitution_mp-1096109_2x2x1_replace_Mn_with_Tc.vasp	-2.89224	-2.83597	0.0562712
VASP_substitution_mp-1096155_2x2x1_replace_Pb_with_Ge.vasp	-1.75113	-1.70055	0.0505844	VASP_substitution_mp-1096155_2x2x1_replace_Pb_with_Ge.vasp	-1.75113	-1.72558	0.0255553
VASP_substitution_mp-1096570_2x2x1_replace_Sc_with_Y.vasp	-3.30024	-3.33031	0.0300746	VASP_substitution_mp-1096570_2x2x1_replace_Sc_with_Y.vasp	-3.30024	-3.35696	0.0567243
VASP_substitution_mp-1096579_2x2x1_replace_K_with_Na.vasp	-1.96251	-1.98669	0.0241801	VASP_substitution_mp-1096579_2x2x1_replace_K_with_Na.vasp	-1.96251	-1.92134	0.0411719
VASP_substitution_mp-1096699_2x2x1_replace_Pd_with_Ni.vasp	-3.47734	-3.45884	0.018491	VASP_substitution_mp-1096699_2x2x1_replace_Pd_with_Ni.vasp	-3.47734	-3.39935	0.0779832
VASP_substitution_mp-1096972_2x2x1_replace_S_with_Te.vasp	-3.66763	-3.79319	0.125556	VASP_substitution_mp-1096972_2x2x1_replace_S_with_Te.vasp	-3.66763	-3.75336	0.0857234
VASP_substitution_mp-1097340_2x2x1_replace_Ga_with_Al.vasp	-3.63463	-3.64673	0.0120984	VASP_substitution_mp-1097340_2x2x1_replace_Ga_with_Al.vasp	-3.63463	-3.60287	0.0317589
VASP_substitution_mp-1097444_2x2x1_replace_Ti_with_Zr.vasp	-4.0489	-3.97869	0.0702144	VASP_substitution_mp-1097444_2x2x1_replace_Ti_with_Zr.vasp	-4.0489	-3.9338	0.115106
VASP_substitution_mp-1097530_2x2x1_replace_Zn_with_Hg.vasp	-1.9801	-2.00543	0.0253327	VASP_substitution_mp-1097530_2x2x1_replace_Zn_with_Hg.vasp	-1.9801	-1.99004	0.0099401
VASP_substitution_mp-1153_2x2x1_replace_Li_with_Cs.vasp	-3.53323	-3.88225	0.349017	VASP_substitution_mp-1153_2x2x1_replace_Li_with_Cs.vasp	-3.53323	-3.86095	0.327721
VASP_substitution_mp-1179886_2x2x1_replace_F_with_Cl.vasp	-4.10116	-3.7451	0.356065	VASP_substitution_mp-1179886_2x2x1_replace_F_with_Cl.vasp	-4.10116	-4.3634	0.262234
VASP_substitution_mp-1183071_2x2x1_replace_Au_with_Cu.vasp	-3.39357	-3.39903	0.0054586	VASP_substitution_mp-1183071_2x2x1_replace_Au_with_Cu.vasp	-3.39357	-3.39623	0.00266044
VASP_substitution_mp-1183313_2x2x1_replace_Hg_with_Zn.vasp	-2.0454	-2.04196	0.0034397	VASP_substitution_mp-1183313_2x2x1_replace_Hg_with_Zn.vasp	-2.0454	-2.0569	0.0115038
VASP_substitution_mp-1183377_2x2x1_replace_Ga_with_In.vasp	-3.79407	-3.85041	0.0563409	VASP_substitution_mp-1183377_2x2x1_replace_Ga_with_In.vasp	-3.79407	-3.79066	0.00341281
VASP_substitution_mp-1183408_2x2x1_replace_Pd_with_Ni.vasp	-4.43253	-4.29457	0.137959	VASP_substitution_mp-1183408_2x2x1_replace_Pd_with_Ni.vasp	-4.43253	-4.32616	0.106372
VASP_substitution_mp-1183448_2x2x1_replace_Ga_with_In.vasp	-2.26632	-2.27979	0.0134709	VASP_substitution_mp-1183448_2x2x1_replace_Ga_with_In.vasp	-2.26632	-2.28306	0.0167412
VASP_substitution_mp-1183678_2x2x1_replace_Co_with_Rh.vasp	-4.04123	-4.37626	0.335035	VASP_substitution_mp-1183678_2x2x1_replace_Co_with_Rh.vasp	-4.04123	-4.44002	0.398792
VASP_substitution_mp-11841_2x2x1_replace_Ag_with_Au.vasp	-4.59015	-4.58989	0.000254775	VASP_substitution_mp-11841_2x2x1_replace_Ag_with_Au.vasp	-4.59015	-4.636	0.045854
VASP_substitution_mp-1184208_2x2x1_replace_Tl_with_Al.vasp	-6.0418	-5.98622	0.0555786	VASP_substitution_mp-1184208_2x2x1_replace_Tl_with_Al.vasp	-6.0418	-5.97387	0.0679321
VASP_substitution_mp-1184226_2x2x1_replace_Ga_with_In.vasp	-2.74784	-2.82721	0.0793652	VASP_substitution_mp-1184226_2x2x1_replace_Ga_with_In.vasp	-2.74784	-2.86541	0.117566
VASP_substitution_mp-1184322_2x2x1_replace_Zn_with_Hg.vasp	-6.31441	-6.33349	0.019083	VASP_substitution_mp-1184322_2x2x1_replace_Zn_with_Hg.vasp	-6.31441	-6.30242	0.0119908
VASP_substitution_mp-1184567_2x2x1_replace_Hf_with_Zr.vasp	-10.499	-10.4882	0.0107843	VASP_substitution_mp-1184567_2x2x1_replace_Hf_with_Zr.vasp	-10.499	-10.4698	0.0291808
VASP_substitution_mp-1184646_2x2x1_replace_Ge_with_Pb.vasp	-3.94486	-4.07205	0.127191	VASP_substitution_mp-1184646_2x2x1_replace_Ge_with_Pb.vasp	-3.94486	-4.03396	0.0890941
VASP_substitution_mp-1184883_2x2x1_replace_In_with_Al.vasp	-2.957	-2.95147	0.00553043	VASP_substitution_mp-1184883_2x2x1_replace_In_with_Al.vasp	-2.957	-2.94277	0.0142297
VASP_substitution_mp-1184894_2x2x1_replace_In_with_Al.vasp	-2.90074	-2.91423	0.0134826	VASP_substitution_mp-1184894_2x2x1_replace_In_with_Al.vasp	-2.90074	-2.92729	0.0265457
VASP_substitution_mp-1184969_2x2x1_replace_Li_with_Cs.vasp	-2.62613	-3.1847	0.558566	VASP_substitution_mp-1184969_2x2x1_replace_Li_with_Cs.vasp	-2.62613	-3.11044	0.484309
VASP_substitution_mp-1185054_2x2x1_replace_K_with_Rb.vasp	-1.37243	-1.38611	0.0136793	VASP_substitution_mp-1185054_2x2x1_replace_K_with_Rb.vasp	-1.37243	-1.37819	0.00576027
VASP_substitution_mp-1185085_2x2x1_replace_Zn_with_Cd.vasp	-4.00167	-4.0309	0.0292348	VASP_substitution_mp-1185085_2x2x1_replace_Zn_with_Cd.vasp	-4.00167	-4.01105	0.00938508
VASP_substitution_mp-1185095_2x2x1_replace_K_with_Cs.vasp	-1.80327	-1.83258	0.0293168	VASP_substitution_mp-1185095_2x2x1_replace_K_with_Cs.vasp	-1.80327	-1.81787	0.0146004
VASP_substitution_mp-1185110_2x2x1_replace_K_with_Li.vasp	-2.10483	-2.124	0.0191611	VASP_substitution_mp-1185110_2x2x1_replace_K_with_Li.vasp	-2.10483	-2.10799	0.00315726
VASP_substitution_mp-1185380_2x2x1_replace_Mg_with_Ba.vasp	-1.71355	-1.81937	0.10582	VASP_substitution_mp-1185380_2x2x1_replace_Mg_with_Ba.vasp	-1.71355	-1.8478	0.134246
VASP_substitution_mp-1185405_2x2x1_replace_Re_with_Tc.vasp	-5.68748	-5.69898	0.0114918	VASP_substitution_mp-1185405_2x2x1_replace_Re_with_Tc.vasp	-5.68748	-5.7226	0.0351104
VASP_substitution_mp-1185497_2x2x1_replace_Ni_with_Pd.vasp	-5.60161	-5.658	0.0563922	VASP_substitution_mp-1185497_2x2x1_replace_Ni_with_Pd.vasp	-5.60161	-5.67361	0.0720033
VASP_substitution_mp-1185619_2x2x1_replace_Zn_with_Cd.vasp	-3.01456	-3.07157	0.0570034	VASP_substitution_mp-1185619_2x2x1_replace_Zn_with_Cd.vasp	-3.01456	-3.07465	0.0600854
VASP_substitution_mp-1185767_2x2x1_replace_Mg_with_Sr.vasp	-4.63642	-4.82504	0.188623	VASP_substitution_mp-1185767_2x2x1_replace_Mg_with_Sr.vasp	-4.63642	-4.80631	0.169886
VASP_substitution_mp-1186124_2x2x1_replace_Na_with_Li.vasp	-3.28738	-3.28249	0.00488676	VASP_substitution_mp-1186124_2x2x1_replace_Na_with_Li.vasp	-3.28738	-3.25243	0.0349498
VASP_substitution_mp-1186295_2x2x1_replace_Cd_with_Hg.vasp	-2.96154	-2.97158	0.0100433	VASP_substitution_mp-1186295_2x2x1_replace_Cd_with_Hg.vasp	-2.96154	-2.94844	0.0130953
VASP_substitution_mp-1186371_2x2x1_replace_P_with_Sb.vasp	-3.7495	-3.80087	0.0513662	VASP_substitution_mp-1186371_2x2x1_replace_P_with_Sb.vasp	-3.7495	-3.75743	0.00793032
VASP_substitution_mp-1186624_2x2x1_replace_In_with_Ga.vasp	-4.1235	-4.11234	0.0111548	VASP_substitution_mp-1186624_2x2x1_replace_In_with_Ga.vasp	-4.1235	-4.10065	0.022847
VASP_substitution_mp-1186880_2x2x1_replace_Zr_with_Hf.vasp	-1.85186	-1.84683	0.00502408	VASP_substitution_mp-1186880_2x2x1_replace_Zr_with_Hf.vasp	-1.85186	-1.80282	0.0490362
VASP_substitution_mp-1187105_2x2x1_replace_Sr_with_Ca.vasp	-1.71793	-1.69701	0.0209176	VASP_substitution_mp-1187105_2x2x1_replace_Sr_with_Ca.vasp	-1.71793	-1.65453	0.0634044
VASP_substitution_mp-1187162_2x2x1_replace_Sr_with_Mg.vasp	-4.45573	-4.59045	0.134715	VASP_substitution_mp-1187162_2x2x1_replace_Sr_with_Mg.vasp	-4.45573	-4.53946	0.0837211
VASP_substitution_mp-1187251_2x2x1_replace_Ta_with_V.vasp	-9.20631	-9.1356	0.0707083	VASP_substitution_mp-1187251_2x2x1_replace_Ta_with_V.vasp	-9.20631	-9.05933	0.146984
VASP_substitution_mp-1187254_2x2x1_replace_Ta_with_Nb.vasp	-5.47242	-5.56665	0.0942355	VASP_substitution_mp-1187254_2x2x1_replace_Ta_with_Nb.vasp	-5.47242	-5.62355	0.151129
VASP_substitution_mp-1187303_2x2x1_replace_Se_with_O.vasp	-4.65843	-4.67169	0.0132583	VASP_substitution_mp-1187303_2x2x1_replace_Se_with_O.vasp	-4.65843	-4.72012	0.0616855
VASP_substitution_mp-1187433_2x2x1_replace_Ti_with_Hf.vasp	-9.19551	-9.26879	0.0732852	VASP_substitution_mp-1187433_2x2x1_replace_Ti_with_Hf.vasp	-9.19551	-9.27758	0.082072
VASP_substitution_mp-1187474_2x2x1_replace_Ti_with_Zr.vasp	-6.26905	-6.35134	0.0822962	VASP_substitution_mp-1187474_2x2x1_replace_Ti_with_Zr.vasp	-6.26905	-6.34568	0.0766348
VASP_substitution_mp-1187545_2x2x1_replace_Tl_with_In.vasp	-2.26359	-2.2818	0.0182082	VASP_substitution_mp-1187545_2x2x1_replace_Tl_with_In.vasp	-2.26359	-2.25859	0.0050044
VASP_substitution_mp-1187580_2x2x1_replace_Sn_with_Ge.vasp	-5.91884	-5.89943	0.0194152	VASP_substitution_mp-1187580_2x2x1_replace_Sn_with_Ge.vasp	-5.91884	-5.82589	0.0929553
VASP_substitution_mp-1187730_2x2x1_replace_Y_with_Sc.vasp	-5.89191	-5.89198	7.0532e-05	VASP_substitution_mp-1187730_2x2x1_replace_Y_with_Sc.vasp	-5.89191	-5.86312	0.0287803
VASP_substitution_mp-1187748_2x2x1_replace_Mn_with_Re.vasp	-9.58529	-9.60897	0.0236778	VASP_substitution_mp-1187748_2x2x1_replace_Mn_with_Re.vasp	-9.58529	-9.65299	0.067702
VASP_substitution_mp-1187821_2x2x1_replace_Ag_with_Cu.vasp	-2.69571	-2.70473	0.00901595	VASP_substitution_mp-1187821_2x2x1_replace_Ag_with_Cu.vasp	-2.69571	-2.67413	0.0215861
VASP_substitution_mp-1187940_2x2x1_replace_Re_with_Tc.vasp	-8.40587	-8.39361	0.0122632	VASP_substitution_mp-1187940_2x2x1_replace_Re_with_Tc.vasp	-8.40587	-8.37278	0.0330925
VASP_substitution_mp-1187968_2x2x1_replace_Cu_with_Au.vasp	-2.18655	-2.16485	0.0217023	VASP_substitution_mp-1187968_2x2x1_replace_Cu_with_Au.vasp	-2.18655	-2.22552	0.0389704
VASP_substitution_mp-1206642_2x2x1_replace_W_with_Cr.vasp	-8.18329	-8.07494	0.108347	VASP_substitution_mp-1206642_2x2x1_replace_W_with_Cr.vasp	-8.18329	-8.23088	0.0475928
VASP_substitution_mp-1215438_2x2x1_replace_Ni_with_Pd.vasp	-3.02829	-3.1086	0.0803049	VASP_substitution_mp-1215438_2x2x1_replace_Ni_with_Pd.vasp	-3.02829	-3.06443	0.0361329
VASP_substitution_mp-1216544_2x2x1_replace_Se_with_O.vasp	-3.62107	-3.61729	0.00378599	VASP_substitution_mp-1216544_2x2x1_replace_Se_with_O.vasp	-3.62107	-3.65502	0.0339513
VASP_substitution_mp-1217032_2x2x1_replace_Al_with_Tl.vasp	-7.26958	-7.38216	0.112576	VASP_substitution_mp-1217032_2x2x1_replace_Al_with_Tl.vasp	-7.26958	-7.41124	0.14166
VASP_substitution_mp-1217428_2x2x1_replace_Tc_with_Mn.vasp	-9.251	-9.20669	0.0443127	VASP_substitution_mp-1217428_2x2x1_replace_Tc_with_Mn.vasp	-9.251	-9.17428	0.0767238
VASP_substitution_mp-1217428_2x2x1_replace_Tc_with_Re.vasp	-9.49121	-9.48539	0.00581839	VASP_substitution_mp-1217428_2x2x1_replace_Tc_with_Re.vasp	-9.49121	-9.44152	0.0496886
VASP_substitution_mp-1218350_2x2x1_replace_Sr_with_Be.vasp	-1.71353	-1.6919	0.0216308	VASP_substitution_mp-1218350_2x2x1_replace_Sr_with_Be.vasp	-1.71353	-1.68341	0.0301239
VASP_substitution_mp-1220071_2x2x1_replace_Ni_with_Pd.vasp	-7.06885	-7.20783	0.138984	VASP_substitution_mp-1220071_2x2x1_replace_Ni_with_Pd.vasp	-7.06885	-7.18313	0.114282
VASP_substitution_mp-1220954_2x2x1_replace_O_with_Te.vasp	-4.26492	-4.51989	0.254974	VASP_substitution_mp-1220954_2x2x1_replace_O_with_Te.vasp	-4.26492	-4.50937	0.244455
VASP_substitution_mp-1222128_2x2x1_replace_Mg_with_Ca.vasp	-1.82806	-1.86299	0.0349337	VASP_substitution_mp-1222128_2x2x1_replace_Mg_with_Ca.vasp	-1.82806	-1.87269	0.044633
VASP_substitution_mp-1223307_2x2x1_replace_Rb_with_Li.vasp	-3.27973	-3.23592	0.0438045	VASP_substitution_mp-1223307_2x2x1_replace_Rb_with_Li.vasp	-3.27973	-3.26403	0.0156994
VASP_substitution_mp-1223789_2x2x1_replace_Sn_with_Ge.vasp	-4.19282	-4.18988	0.00294536	VASP_substitution_mp-1223789_2x2x1_replace_Sn_with_Ge.vasp	-4.19282	-4.14122	0.0516033
VASP_substitution_mp-1223839_2x2x1_replace_Ag_with_Cu.vasp	-2.67557	-2.6664	0.00917482	VASP_substitution_mp-1223839_2x2x1_replace_Ag_with_Cu.vasp	-2.67557	-2.67087	0.00470189
VASP_substitution_mp-1223922_2x2x1_replace_Hg_with_Zn.vasp	-1.8742	-1.91102	0.0368215	VASP_substitution_mp-1223922_2x2x1_replace_Hg_with_Zn.vasp	-1.8742	-1.93748	0.0632792
VASP_substitution_mp-1224308_2x2x1_replace_Hf_with_Zr.vasp	-10.0906	-10.0702	0.0203443	VASP_substitution_mp-1224308_2x2x1_replace_Hf_with_Zr.vasp	-10.0906	-10.1097	0.019143
VASP_substitution_mp-1227038_2x2x1_replace_Ca_with_Be.vasp	-5.35845	-5.37368	0.0152337	VASP_substitution_mp-1227038_2x2x1_replace_Ca_with_Be.vasp	-5.35845	-5.38805	0.0296038
VASP_substitution_mp-1272749_2x2x1_replace_O_with_Se.vasp	-6.25006	-6.10221	0.147846	VASP_substitution_mp-1272749_2x2x1_replace_O_with_Se.vasp	-6.25006	-6.08433	0.165727
VASP_substitution_mp-1279979_2x2x1_replace_O_with_S.vasp	-7.69881	-7.77518	0.0763651	VASP_substitution_mp-1279979_2x2x1_replace_O_with_S.vasp	-7.69881	-7.64351	0.0552989
VASP_substitution_mp-13396_2x2x1_replace_Rh_with_Co.vasp	-3.88641	-3.87621	0.0101966	VASP_substitution_mp-13396_2x2x1_replace_Rh_with_Co.vasp	-3.88641	-3.8646	0.0218104
VASP_substitution_mp-1352_2x2x1_replace_Zr_with_Ti.vasp	-10.0146	-9.95724	0.0573834	VASP_substitution_mp-1352_2x2x1_replace_Zr_with_Ti.vasp	-10.0146	-9.92769	0.0869349
VASP_substitution_mp-15791_2x2x1_replace_Li_with_Cs.vasp	-5.25955	-5.45407	0.194524	VASP_substitution_mp-15791_2x2x1_replace_Li_with_Cs.vasp	-5.25955	-5.51251	0.252958
VASP_substitution_mp-1580_2x2x1_replace_N_with_Bi.vasp	-7.89755	-9.87035	1.97279	VASP_substitution_mp-1580_2x2x1_replace_N_with_Bi.vasp	-7.89755	-9.74139	1.84384
VASP_substitution_mp-20567_2x2x1_replace_Li_with_Na.vasp	-4.42395	-4.52334	0.0993944	VASP_substitution_mp-20567_2x2x1_replace_Li_with_Na.vasp	-4.42395	-4.40096	0.0229896
VASP_substitution_mp-20729_2x2x1_replace_In_with_B.vasp	-3.68417	-3.69175	0.00757754	VASP_substitution_mp-20729_2x2x1_replace_In_with_B.vasp	-3.68417	-3.6734	0.0107751
VASP_substitution_mp-21_2x2x1_replace_Ca_with_Mg.vasp	-1.75146	-1.69579	0.0556764	VASP_substitution_mp-21_2x2x1_replace_Ca_with_Mg.vasp	-1.75146	-1.62587	0.125589
VASP_substitution_mp-21430_2x2x1_replace_Pb_with_Si.vasp	-3.46919	-3.39984	0.0693515	VASP_substitution_mp-21430_2x2x1_replace_Pb_with_Si.vasp	-3.46919	-3.36933	0.0998653
VASP_substitution_mp-2375_2x2x1_replace_Pd_with_Pt.vasp	-7.61808	-7.59532	0.0227607	VASP_substitution_mp-2375_2x2x1_replace_Pd_with_Pt.vasp	-7.61808	-7.59077	0.0273114
VASP_substitution_mp-241_2x2x1_replace_F_with_I.vasp	-3.11704	-3.48173	0.364687	VASP_substitution_mp-241_2x2x1_replace_F_with_I.vasp	-3.11704	-3.52123	0.404195
VASP_substitution_mp-2484_2x2x1_replace_Sn_with_C.vasp	-4.57705	-4.65866	0.0816049	VASP_substitution_mp-2484_2x2x1_replace_Sn_with_C.vasp	-4.57705	-4.5596	0.017448
VASP_substitution_mp-249_2x2x1_replace_Al_with_Ga.vasp	-7.19227	-7.20274	0.0104666	VASP_substitution_mp-249_2x2x1_replace_Al_with_Ga.vasp	-7.19227	-7.2115	0.0192291
VASP_substitution_mp-2648_2x2x1_replace_Nb_with_Ta.vasp	-7.28734	-7.30676	0.0194186	VASP_substitution_mp-2648_2x2x1_replace_Nb_with_Ta.vasp	-7.28734	-7.27488	0.0124563
VASP_substitution_mp-29733_2x2x1_replace_Mg_with_Ca.vasp	-3.9017	-3.90285	0.00115332	VASP_substitution_mp-29733_2x2x1_replace_Mg_with_Ca.vasp	-3.9017	-3.94916	0.0474637
VASP_substitution_mp-30338_2x2x1_replace_Al_with_Ga.vasp	-5.91328	-5.91645	0.00317272	VASP_substitution_mp-30338_2x2x1_replace_Al_with_Ga.vasp	-5.91328	-5.87566	0.0376208
VASP_substitution_mp-30377_2x2x1_replace_Pb_with_C.vasp	-4.57399	-4.66628	0.0922882	VASP_substitution_mp-30377_2x2x1_replace_Pb_with_C.vasp	-4.57399	-4.59278	0.0187897
VASP_substitution_mp-30821_2x2x1_replace_Li_with_Na.vasp	-4.70825	-4.77728	0.0690268	VASP_substitution_mp-30821_2x2x1_replace_Li_with_Na.vasp	-4.70825	-4.8035	0.095246
VASP_substitution_mp-31339_2x2x1_replace_Sc_with_Y.vasp	-5.63519	-5.68164	0.0464434	VASP_substitution_mp-31339_2x2x1_replace_Sc_with_Y.vasp	-5.63519	-5.70264	0.0674453
VASP_substitution_mp-35216_2x2x1_replace_Te_with_O.vasp	-3.53041	-3.65394	0.123529	VASP_substitution_mp-35216_2x2x1_replace_Te_with_O.vasp	-3.53041	-3.71682	0.186406
VASP_substitution_mp-36526_2x2x1_replace_F_with_Cl.vasp	-7.0183	-7.3286	0.310308	VASP_substitution_mp-36526_2x2x1_replace_F_with_Cl.vasp	-7.0183	-7.28098	0.262679
VASP_substitution_mp-4182_2x2x1_replace_Ag_with_Cu.vasp	-5.64073	-5.4605	0.180236	VASP_substitution_mp-4182_2x2x1_replace_Ag_with_Cu.vasp	-5.64073	-5.57305	0.0676888
VASP_substitution_mp-4262_2x2x1_replace_Be_with_Ba.vasp	-3.72584	-4.9847	1.25886	VASP_substitution_mp-4262_2x2x1_replace_Be_with_Ba.vasp	-3.72584	-5.02957	1.30373
VASP_substitution_mp-519_2x2x1_replace_Sb_with_N.vasp	-8.3008	-8.1342	0.166604	VASP_substitution_mp-519_2x2x1_replace_Sb_with_N.vasp	-8.3008	-8.17782	0.122986
VASP_substitution_mp-55_2x2x1_replace_Sn_with_Pb.vasp	-3.70221	-3.76683	0.0646219	VASP_substitution_mp-55_2x2x1_replace_Sn_with_Pb.vasp	-3.70221	-3.73988	0.0376741
VASP_substitution_mp-557655_2x2x1_replace_S_with_Te.vasp	-5.12847	-5.15503	0.0265558	VASP_substitution_mp-557655_2x2x1_replace_S_with_Te.vasp	-5.12847	-5.21607	0.0876007
VASP_substitution_mp-567348_2x2x1_replace_In_with_Tl.vasp	-5.13915	-5.15658	0.0174297	VASP_substitution_mp-567348_2x2x1_replace_In_with_Tl.vasp	-5.13915	-5.1834	0.0442434
VASP_substitution_mp-567787_2x2x1_replace_In_with_Ga.vasp	-2.70875	-2.69019	0.0185642	VASP_substitution_mp-567787_2x2x1_replace_In_with_Ga.vasp	-2.70875	-2.70361	0.00514679
VASP_substitution_mp-569346_2x2x1_replace_Cu_with_Ag.vasp	-2.71301	-2.75253	0.0395158	VASP_substitution_mp-569346_2x2x1_replace_Cu_with_Ag.vasp	-2.71301	-2.78131	0.0682946
VASP_substitution_mp-570964_2x2x1_replace_I_with_F.vasp	-2.13325	-2.12263	0.0106151	VASP_substitution_mp-570964_2x2x1_replace_I_with_F.vasp	-2.13325	-2.15501	0.021766
VASP_substitution_mp-571102_2x2x1_replace_Tl_with_B.vasp	-2.41501	-2.55199	0.136974	VASP_substitution_mp-571102_2x2x1_replace_Tl_with_B.vasp	-2.41501	-2.49061	0.075598
VASP_substitution_mp-5808_2x2x1_replace_Te_with_O.vasp	-4.60666	-4.52777	0.0788882	VASP_substitution_mp-5808_2x2x1_replace_Te_with_O.vasp	-4.60666	-4.58332	0.023332
VASP_substitution_mp-600604_2x2x1_replace_O_with_S.vasp	-4.36891	-4.45221	0.0833054	VASP_substitution_mp-600604_2x2x1_replace_O_with_S.vasp	-4.36891	-4.38424	0.0153386
VASP_substitution_mp-623452_2x2x1_replace_Mn_with_Re.vasp	-7.42718	-7.14467	0.282507	VASP_substitution_mp-623452_2x2x1_replace_Mn_with_Re.vasp	-7.42718	-7.04824	0.378941
VASP_substitution_mp-631270_2x2x1_replace_Pb_with_Sn.vasp	-3.98603	-3.94806	0.0379674	VASP_substitution_mp-631270_2x2x1_replace_Pb_with_Sn.vasp	-3.98603	-3.9767	0.00932686
VASP_substitution_mp-631411_2x2x1_replace_Ta_with_Nb.vasp	-6.23467	-6.31059	0.0759203	VASP_substitution_mp-631411_2x2x1_replace_Ta_with_Nb.vasp	-6.23467	-6.08115	0.153523
VASP_substitution_mp-672356_2x2x1_replace_Sb_with_P.vasp	-6.61506	-6.57158	0.0434848	VASP_substitution_mp-672356_2x2x1_replace_Sb_with_P.vasp	-6.61506	-6.45714	0.157926
VASP_substitution_mp-753298_2x2x1_replace_O_with_Se.vasp	-7.73467	-7.98583	0.251155	VASP_substitution_mp-753298_2x2x1_replace_O_with_Se.vasp	-7.73467	-7.96788	0.233212
VASP_substitution_mp-753898_2x2x1_replace_O_with_Se.vasp	-7.35252	-7.63831	0.285795	VASP_substitution_mp-753898_2x2x1_replace_O_with_Se.vasp	-7.35252	-7.6341	0.281581
VASP_substitution_mp-772856_2x2x1_replace_Cu_with_Au.vasp	-3.72671	-3.80399	0.0772796	VASP_substitution_mp-772856_2x2x1_replace_Cu_with_Au.vasp	-3.72671	-3.78127	0.0545587
VASP_substitution_mp-828_2x2x1_replace_Si_with_Sn.vasp	-5.73218	-5.86612	0.133937	VASP_substitution_mp-828_2x2x1_replace_Si_with_Sn.vasp	-5.73218	-5.85717	0.124993
VASP_substitution_mp-8540_2x2x1_replace_C_with_Si.vasp	-7.57746	-7.69808	0.120625	VASP_substitution_mp-8540_2x2x1_replace_C_with_Si.vasp	-7.57746	-7.77607	0.198615
VASP_substitution_mp-862319_2x2x1_replace_Sn_with_Ge.vasp	-3.68145	-3.69779	0.0163376	VASP_substitution_mp-862319_2x2x1_replace_Sn_with_Ge.vasp	-3.68145	-3.64151	0.0399412
VASP_substitution_mp-862338_2x2x1_replace_Ru_with_Os.vasp	-6.93598	-6.93173	0.00424822	VASP_substitution_mp-862338_2x2x1_replace_Ru_with_Os.vasp	-6.93598	-6.91044	0.0255471
VASP_substitution_mp-862492_2x2x1_replace_Tl_with_Ga.vasp	-3.0679	-3.0396	0.0282999	VASP_substitution_mp-862492_2x2x1_replace_Tl_with_Ga.vasp	-3.0679	-3.03013	0.03777
VASP_substitution_mp-862629_2x2x1_replace_Rh_with_Co.vasp	-6.55634	-6.54604	0.0102952	VASP_substitution_mp-862629_2x2x1_replace_Rh_with_Co.vasp	-6.55634	-6.52609	0.0302453
VASP_substitution_mp-862790_2x2x1_replace_Tc_with_Mn.vasp	-8.76001	-8.62537	0.134639	VASP_substitution_mp-862790_2x2x1_replace_Tc_with_Mn.vasp	-8.76001	-8.75497	0.00503971
VASP_substitution_mp-862805_2x2x1_replace_Sn_with_Pb.vasp	-4.40354	-4.41419	0.0106509	VASP_substitution_mp-862805_2x2x1_replace_Sn_with_Pb.vasp	-4.40354	-4.43268	0.0291365
VASP_substitution_mp-862977_2x2x1_replace_Ag_with_Au.vasp	-5.80634	-5.77973	0.0266115	VASP_substitution_mp-862977_2x2x1_replace_Ag_with_Au.vasp	-5.80634	-5.80118	0.00516475
VASP_substitution_mp-863738_2x2x1_replace_Cd_with_Hg.vasp	-4.62423	-4.61664	0.00758541	VASP_substitution_mp-863738_2x2x1_replace_Cd_with_Hg.vasp	-4.62423	-4.6027	0.0215288
VASP_substitution_mp-864961_2x2x1_replace_Pd_with_Ni.vasp	-5.37308	-5.2927	0.0803853	VASP_substitution_mp-864961_2x2x1_replace_Pd_with_Ni.vasp	-5.37308	-5.25425	0.118828
VASP_substitution_mp-865365_2x2x1_replace_Ni_with_Pd.vasp	-6.59239	-6.61836	0.0259658	VASP_substitution_mp-865365_2x2x1_replace_Ni_with_Pd.vasp	-6.59239	-6.62423	0.0318346
VASP_substitution_mp-865591_2x2x1_replace_Ti_with_Hf.vasp	-8.39974	-8.44738	0.047645	VASP_substitution_mp-865591_2x2x1_replace_Ti_with_Hf.vasp	-8.39974	-8.46554	0.0658051
VASP_substitution_mp-865807_2x2x1_replace_Mo_with_Cr.vasp	-9.36419	-9.29754	0.066643	VASP_substitution_mp-865807_2x2x1_replace_Mo_with_Cr.vasp	-9.36419	-9.30311	0.0610798
VASP_substitution_mp-865901_2x2x1_replace_Co_with_Rh.vasp	-6.42677	-6.48489	0.0581208	VASP_substitution_mp-865901_2x2x1_replace_Co_with_Rh.vasp	-6.42677	-6.42602	0.000755209
VASP_substitution_mp-865965_2x2x1_replace_Ca_with_Ba.vasp	-3.0506	-3.1585	0.107906	VASP_substitution_mp-865965_2x2x1_replace_Ca_with_Ba.vasp	-3.0506	-3.13397	0.0833789
VASP_substitution_mp-865991_2x2x1_replace_Zn_with_Cd.vasp	-2.44361	-2.47524	0.0316373	VASP_substitution_mp-865991_2x2x1_replace_Zn_with_Cd.vasp	-2.44361	-2.46271	0.0191056
VASP_substitution_mp-866105_2x2x1_replace_Ca_with_Ba.vasp	-2.47627	-2.50224	0.0259671	VASP_substitution_mp-866105_2x2x1_replace_Ca_with_Ba.vasp	-2.47627	-2.50998	0.0337104
VASP_substitution_mp-866157_2x2x1_replace_Ga_with_Tl.vasp	-6.96118	-7.09974	0.138567	VASP_substitution_mp-866157_2x2x1_replace_Ga_with_Tl.vasp	-6.96118	-7.11024	0.149066
VASP_substitution_mp-866178_2x2x1_replace_Li_with_Rb.vasp	-2.99154	-3.28886	0.297314	VASP_substitution_mp-866178_2x2x1_replace_Li_with_Rb.vasp	-2.99154	-3.19716	0.205622
VASP_substitution_mp-866224_2x2x1_replace_Pt_with_Pd.vasp	-5.3262	-5.29996	0.026234	VASP_substitution_mp-866224_2x2x1_replace_Pt_with_Pd.vasp	-5.3262	-5.25483	0.0713701
VASP_substitution_mp-867206_2x2x1_replace_Pt_with_Ni.vasp	-2.69875	-2.65403	0.0447234	VASP_substitution_mp-867206_2x2x1_replace_Pt_with_Ni.vasp	-2.69875	-2.63908	0.059669
VASP_substitution_mp-867927_2x2x1_replace_V_with_Ta.vasp	-7.83667	-7.92978	0.0931086	VASP_substitution_mp-867927_2x2x1_replace_V_with_Ta.vasp	-7.83667	-7.86979	0.0331193
VASP_substitution_mp-881_2x2x1_replace_Sn_with_C.vasp	-6.25659	-6.31108	0.0544919	VASP_substitution_mp-881_2x2x1_replace_Sn_with_C.vasp	-6.25659	-6.22128	0.0353089
VASP_substitution_mp-961718_2x2x1_replace_As_with_P.vasp	-7.11036	-7.08748	0.0228879	VASP_substitution_mp-961718_2x2x1_replace_As_with_P.vasp	-7.11036	-7.07246	0.0379011
VASP_substitution_mp-962071_2x2x1_replace_Sc_with_Y.vasp	-3.10125	-3.18768	0.0864247	VASP_substitution_mp-962071_2x2x1_replace_Sc_with_Y.vasp	-3.10125	-3.19362	0.0923684
VASP_substitution_mp-973111_2x2x1_replace_In_with_Ga.vasp	-2.57142	-2.56835	0.0030688	VASP_substitution_mp-973111_2x2x1_replace_In_with_Ga.vasp	-2.57142	-2.57539	0.00397705
VASP_substitution_mp-973461_2x2x1_replace_Hg_with_Zn.vasp	-1.69497	-1.82231	0.127343	VASP_substitution_mp-973461_2x2x1_replace_Hg_with_Zn.vasp	-1.69497	-1.97575	0.280779
VASP_substitution_mp-973886_2x2x1_replace_Co_with_Rh.vasp	-6.51504	-6.56378	0.0487417	VASP_substitution_mp-973886_2x2x1_replace_Co_with_Rh.vasp	-6.51504	-6.57658	0.0615406
VASP_substitution_mp-974820_2x2x1_replace_Tc_with_Re.vasp	-2.09205	-2.20134	0.109291	VASP_substitution_mp-974820_2x2x1_replace_Tc_with_Re.vasp	-2.09205	-2.18615	0.0940984
VASP_substitution_mp-974933_2x2x1_replace_Rb_with_K.vasp	-2.23343	-2.13622	0.0972022	VASP_substitution_mp-974933_2x2x1_replace_Rb_with_K.vasp	-2.23343	-2.07028	0.163144
VASP_substitution_mp-977386_2x2x1_replace_Li_with_Rb.vasp	-5.07873	-5.36123	0.282502	VASP_substitution_mp-977386_2x2x1_replace_Li_with_Rb.vasp	-5.07873	-5.23533	0.156598
VASP_substitution_mp-977418_2x2x1_replace_Au_with_Ag.vasp	-2.98477	-3.00224	0.0174699	VASP_substitution_mp-977418_2x2x1_replace_Au_with_Ag.vasp	-2.98477	-3.02278	0.0380058
VASP_substitution_mp-977454_2x2x1_replace_Hg_with_Zn.vasp	-3.70684	-3.64674	0.0601033	VASP_substitution_mp-977454_2x2x1_replace_Hg_with_Zn.vasp	-3.70684	-3.6865	0.0203419
VASP_substitution_mp-977567_2x2x1_replace_Re_with_Mn.vasp	-9.0352	-9.01054	0.0246684	VASP_substitution_mp-977567_2x2x1_replace_Re_with_Mn.vasp	-9.0352	-8.98524	0.0499603
VASP_substitution_mp-977567_2x2x1_replace_Re_with_Tc.vasp	-9.1687	-9.15665	0.0120473	VASP_substitution_mp-977567_2x2x1_replace_Re_with_Tc.vasp	-9.1687	-9.14296	0.0257343
VASP_substitution_mp-979429_2x2x1_replace_Cd_with_Zn.vasp	-3.47795	-3.46093	0.0170211	VASP_substitution_mp-979429_2x2x1_replace_Cd_with_Zn.vasp	-3.47795	-3.41632	0.061631
VASP_substitution_mp-980946_2x2x1_replace_Sr_with_Ca.vasp	-3.04675	-2.79217	0.254576	VASP_substitution_mp-980946_2x2x1_replace_Sr_with_Ca.vasp	-3.04675	-2.69416	0.352585
VASP_substitution_mp-981387_2x2x1_replace_Hg_with_Zn.vasp	-1.04843	-1.09147	0.04304	VASP_substitution_mp-981387_2x2x1_replace_Hg_with_Zn.vasp	-1.04843	-1.1488	0.100369
VASP_substitution_mp-982667_2x2x1_replace_Al_with_Ga.vasp	-5.48834	-5.54196	0.0536162	VASP_substitution_mp-982667_2x2x1_replace_Al_with_Ga.vasp	-5.48834	-5.52753	0.0391915
VASP_substitution_mp-983444_2x2x1_replace_Zn_with_Hg.vasp	-2.42661	-2.47658	0.0499688	VASP_substitution_mp-983444_2x2x1_replace_Zn_with_Hg.vasp	-2.42661	-2.45142	0.0248092
VASP_substitution_mp-984352_2x2x1_replace_Al_with_In.vasp	-6.70796	-6.81632	0.108368	VASP_substitution_mp-984352_2x2x1_replace_Al_with_In.vasp	-6.70796	-6.80055	0.092598
VASP_substitution_mp-984551_2x2x1_replace_Hg_with_Cd.vasp	-2.07401	-2.09509	0.021081	VASP_substitution_mp-984551_2x2x1_replace_Hg_with_Cd.vasp	-2.07401	-2.11495	0.0409455
VASP_substitution_mp-985282_2x2x1_replace_Ag_with_Au.vasp	-3.10509	-3.15972	0.0546322	VASP_substitution_mp-985282_2x2x1_replace_Ag_with_Au.vasp	-3.10509	-3.15784	0.0527548
VASP_substitution_mp-999307_2x2x1_replace_Os_with_Ru.vasp	-9.03861	-9.06148	0.0228723	VASP_substitution_mp-999307_2x2x1_replace_Os_with_Ru.vasp	-9.03861	-9.01233	0.0262781
VASP_substitution_mp-999441_2x2x1_replace_Nb_with_Ta.vasp	-9.80181	-9.84073	0.0389229	VASP_substitution_mp-999441_2x2x1_replace_Nb_with_Ta.vasp	-9.80181	-9.80176	4.6273e-05

## Sheet: Swaps-PtPdIrRh
structure	DFT Total energy/atom	DIEP Total energy/atom	DIEP Abs(error)	structure	DFT Total energy/atom	M3GNET Total energy/atom	M3GNET Abs(error)
VASP_52.vasp	-6.79279	-6.82601	0.0332222	VASP_52.vasp	-6.79279	-6.84521	0.0524198
VASP_90.vasp	-6.80424	-6.84156	0.0373266	VASP_90.vasp	-6.80424	-6.84197	0.0377315
VASP_221.vasp	-6.79367	-6.82652	0.0328487	VASP_221.vasp	-6.79367	-6.84535	0.051684
VASP_137.vasp	-6.79279	-6.82601	0.0332238	VASP_137.vasp	-6.79279	-6.84521	0.0524214
VASP_197.vasp	-6.78286	-6.81392	0.0310649	VASP_197.vasp	-6.78286	-6.85074	0.0678849
VASP_83.vasp	-6.78674	-6.82667	0.0399349	VASP_83.vasp	-6.78674	-6.8571	0.0703684
VASP_80.vasp	-6.78286	-6.81393	0.0310682	VASP_80.vasp	-6.78286	-6.85074	0.0678859
VASP_69.vasp	-6.79581	-6.82766	0.0318473	VASP_69.vasp	-6.79581	-6.84955	0.0537376
VASP_134.vasp	-6.77918	-6.83839	0.0592114	VASP_134.vasp	-6.77918	-6.84913	0.0699567
VASP_0.vasp	-6.78286	-6.81393	0.0310662	VASP_0.vasp	-6.78286	-6.85074	0.0678851
VASP_216.vasp	-6.80421	-6.84551	0.0412957	VASP_216.vasp	-6.80421	-6.85905	0.0548387
VASP_55.vasp	-6.80209	-6.85382	0.0517304	VASP_55.vasp	-6.80209	-6.84987	0.047787
VASP_56.vasp	-6.80778	-6.84356	0.0357793	VASP_56.vasp	-6.80778	-6.8472	0.0394193
VASP_61.vasp	-6.78286	-6.81393	0.0310662	VASP_61.vasp	-6.78286	-6.85074	0.0678855
VASP_85.vasp	-6.80378	-6.84349	0.0397133	VASP_85.vasp	-6.80378	-6.84645	0.0426643
VASP_114.vasp	-6.79581	-6.82766	0.0318491	VASP_114.vasp	-6.79581	-6.84955	0.0537388
VASP_210.vasp	-6.79581	-6.82766	0.0318491	VASP_210.vasp	-6.79581	-6.84955	0.0537391
VASP_271.vasp	-6.78286	-6.81392	0.0310652	VASP_271.vasp	-6.78286	-6.85074	0.0678828
VASP_259.vasp	-6.78286	-6.81393	0.0310675	VASP_259.vasp	-6.78286	-6.85074	0.0678857
VASP_181.vasp	-6.78286	-6.81393	0.0310662	VASP_181.vasp	-6.78286	-6.85074	0.0678853
VASP_67.vasp	-6.80421	-6.84551	0.0412953	VASP_67.vasp	-6.80421	-6.85905	0.0548383
VASP_217.vasp	-6.81442	-6.87383	0.0594186	VASP_217.vasp	-6.81442	-6.86433	0.0499121
VASP_119.vasp	-6.78674	-6.82674	0.0400042	VASP_119.vasp	-6.78674	-6.85716	0.0704287
VASP_284.vasp	-6.79045	-6.81208	0.021634	VASP_284.vasp	-6.79045	-6.85175	0.0612951
VASP_183.vasp	-6.79279	-6.82601	0.0332238	VASP_183.vasp	-6.79279	-6.84521	0.0524214
VASP_103.vasp	-6.80421	-6.8455	0.0412942	VASP_103.vasp	-6.80421	-6.85905	0.0548375
VASP_14.vasp	-6.78461	-6.86478	0.0801648	VASP_14.vasp	-6.78461	-6.84945	0.0648381
VASP_148.vasp	-6.79367	-6.82652	0.0328492	VASP_148.vasp	-6.79367	-6.84535	0.0516823
VASP_257.vasp	-6.79279	-6.82601	0.0332241	VASP_257.vasp	-6.79279	-6.84521	0.0524222
VASP_294.vasp	-6.80421	-6.84551	0.0412942	VASP_294.vasp	-6.80421	-6.85905	0.0548381
VASP_115.vasp	-6.80209	-6.85381	0.0517282	VASP_115.vasp	-6.80209	-6.84987	0.0477857
VASP_136.vasp	-6.80421	-6.84551	0.0412942	VASP_136.vasp	-6.80421	-6.85905	0.054839
VASP_250.vasp	-6.81442	-6.87372	0.0592984	VASP_250.vasp	-6.81442	-6.86422	0.0498041
VASP_74.vasp	-6.80378	-6.84339	0.0396096	VASP_74.vasp	-6.80378	-6.84635	0.0425735
VASP_42.vasp	-6.80424	-6.84156	0.0373266	VASP_42.vasp	-6.80424	-6.84197	0.0377312
VASP_82.vasp	-6.79367	-6.82652	0.0328491	VASP_82.vasp	-6.79367	-6.84535	0.0516807
VASP_62.vasp	-6.78462	-6.86433	0.0797128	VASP_62.vasp	-6.78462	-6.84901	0.0643847
VASP_252.vasp	-6.80424	-6.84156	0.0373259	VASP_252.vasp	-6.80424	-6.84197	0.0377321
VASP_106.vasp	-6.80378	-6.84339	0.0396093	VASP_106.vasp	-6.80378	-6.84635	0.0425734
VASP_154.vasp	-6.78286	-6.81393	0.0310666	VASP_154.vasp	-6.78286	-6.85074	0.0678838
VASP_50.vasp	-6.78286	-6.81393	0.0310665	VASP_50.vasp	-6.78286	-6.85075	0.0678864
VASP_184.vasp	-6.79367	-6.82651	0.0328475	VASP_184.vasp	-6.79367	-6.84535	0.0516838
VASP_139.vasp	-6.79531	-6.82744	0.0321307	VASP_139.vasp	-6.79531	-6.84956	0.0542474
VASP_64.vasp	-6.79367	-6.82651	0.0328455	VASP_64.vasp	-6.79367	-6.84535	0.0516808
VASP_63.vasp	-6.80424	-6.84156	0.0373257	VASP_63.vasp	-6.80424	-6.84197	0.0377329
VASP_185.vasp	-6.80209	-6.85381	0.0517279	VASP_185.vasp	-6.80209	-6.84987	0.0477852
VASP_25.vasp	-6.77918	-6.83839	0.0592114	VASP_25.vasp	-6.77918	-6.84913	0.0699545
VASP_124.vasp	-6.79531	-6.82744	0.0321306	VASP_124.vasp	-6.79531	-6.84956	0.0542471
VASP_182.vasp	-6.80777	-6.84344	0.0356666	VASP_182.vasp	-6.80777	-6.84716	0.0393819
VASP_145.vasp	-6.81442	-6.87383	0.0594187	VASP_145.vasp	-6.81442	-6.86433	0.0499146
VASP_164.vasp	-6.80209	-6.85382	0.0517288	VASP_164.vasp	-6.80209	-6.84987	0.0477832
VASP_19.vasp	-6.80421	-6.84551	0.0412949	VASP_19.vasp	-6.80421	-6.85905	0.0548379
VASP_253.vasp	-6.80421	-6.84551	0.0412945	VASP_253.vasp	-6.80421	-6.85905	0.0548378
VASP_57.vasp	-6.78674	-6.82667	0.0399359	VASP_57.vasp	-6.78674	-6.85711	0.0703763
VASP_279.vasp	-6.79531	-6.82744	0.0321299	VASP_279.vasp	-6.79531	-6.84956	0.0542446
VASP_146.vasp	-6.77918	-6.83839	0.0592113	VASP_146.vasp	-6.77918	-6.84913	0.069958
VASP_267.vasp	-6.79045	-6.81208	0.0216248	VASP_267.vasp	-6.79045	-6.85174	0.0612849
VASP_127.vasp	-6.79531	-6.82744	0.0321317	VASP_127.vasp	-6.79531	-6.84955	0.0542437
VASP_225.vasp	-6.80778	-6.84355	0.035773	VASP_225.vasp	-6.80778	-6.8472	0.0394139
VASP_275.vasp	-6.80421	-6.84551	0.0412953	VASP_275.vasp	-6.80421	-6.85905	0.0548387
VASP_78.vasp	-6.78286	-6.81393	0.0310672	VASP_78.vasp	-6.78286	-6.85074	0.0678854
VASP_246.vasp	-6.79531	-6.82744	0.0321301	VASP_246.vasp	-6.79531	-6.84955	0.0542421
VASP_153.vasp	-6.77918	-6.83839	0.0592123	VASP_153.vasp	-6.77918	-6.84913	0.0699566
VASP_290.vasp	-6.79045	-6.81208	0.0216278	VASP_290.vasp	-6.79045	-6.85174	0.0612903
VASP_71.vasp	-6.78674	-6.82667	0.039934	VASP_71.vasp	-6.78674	-6.8571	0.0703646
VASP_245.vasp	-6.79045	-6.81207	0.0216238	VASP_245.vasp	-6.79045	-6.85174	0.0612873
VASP_18.vasp	-6.78286	-6.81393	0.031067	VASP_18.vasp	-6.78286	-6.85075	0.0678872
VASP_70.vasp	-6.80421	-6.84551	0.0412948	VASP_70.vasp	-6.80421	-6.85905	0.054841
VASP_30.vasp	-6.79279	-6.82601	0.0332238	VASP_30.vasp	-6.79279	-6.84521	0.0524214
VASP_276.vasp	-6.77918	-6.83839	0.0592117	VASP_276.vasp	-6.77918	-6.84913	0.0699564
VASP_251.vasp	-6.78286	-6.81392	0.0310649	VASP_251.vasp	-6.78286	-6.85075	0.0678858
VASP_263.vasp	-6.79045	-6.81207	0.02162	VASP_263.vasp	-6.79045	-6.85173	0.0612842
VASP_22.vasp	-6.80424	-6.84156	0.0373255	VASP_22.vasp	-6.80424	-6.84197	0.0377312
VASP_12.vasp	-6.79531	-6.82744	0.0321306	VASP_12.vasp	-6.79531	-6.84956	0.0542468
VASP_248.vasp	-6.80209	-6.85382	0.0517296	VASP_248.vasp	-6.80209	-6.84987	0.0477867
VASP_231.vasp	-6.79367	-6.82651	0.0328472	VASP_231.vasp	-6.79367	-6.84535	0.0516819
VASP_165.vasp	-6.79531	-6.82744	0.0321323	VASP_165.vasp	-6.79531	-6.84956	0.0542471
VASP_91.vasp	-6.79581	-6.82766	0.0318494	VASP_91.vasp	-6.79581	-6.84955	0.0537378
VASP_201.vasp	-6.79367	-6.82651	0.0328475	VASP_201.vasp	-6.79367	-6.84535	0.051683
VASP_212.vasp	-6.8013	-6.83999	0.0386926	VASP_212.vasp	-6.8013	-6.8372	0.0359057
VASP_1.vasp	-6.79367	-6.82652	0.0328487	VASP_1.vasp	-6.79367	-6.84535	0.0516854
VASP_75.vasp	-6.79593	-6.83937	0.0434319	VASP_75.vasp	-6.79593	-6.83648	0.0405501
VASP_236.vasp	-6.80421	-6.84551	0.0412939	VASP_236.vasp	-6.80421	-6.85905	0.0548388
VASP_34.vasp	-6.79367	-6.82652	0.0328478	VASP_34.vasp	-6.79367	-6.84535	0.0516799
VASP_268.vasp	-6.80378	-6.84341	0.0396246	VASP_268.vasp	-6.80378	-6.84637	0.0425884
VASP_125.vasp	-6.78286	-6.81393	0.031068	VASP_125.vasp	-6.78286	-6.85074	0.0678837
VASP_98.vasp	-6.79279	-6.82601	0.0332233	VASP_98.vasp	-6.79279	-6.8452	0.0524191
VASP_35.vasp	-6.80424	-6.84156	0.0373245	VASP_35.vasp	-6.80424	-6.84197	0.0377319
VASP_129.vasp	-6.77918	-6.83839	0.0592126	VASP_129.vasp	-6.77918	-6.84913	0.0699567
VASP_261.vasp	-6.79367	-6.82651	0.0328482	VASP_261.vasp	-6.79367	-6.84535	0.0516822
VASP_100.vasp	-6.81442	-6.87383	0.0594153	VASP_100.vasp	-6.81442	-6.86433	0.049909
VASP_158.vasp	-6.80424	-6.84156	0.0373258	VASP_158.vasp	-6.80424	-6.84197	0.0377319
VASP_128.vasp	-6.80424	-6.84157	0.0373275	VASP_128.vasp	-6.80424	-6.84197	0.0377332
VASP_41.vasp	-6.79531	-6.82744	0.0321298	VASP_41.vasp	-6.79531	-6.84955	0.0542435
VASP_4.vasp	-6.80424	-6.84156	0.0373262	VASP_4.vasp	-6.80424	-6.84197	0.0377326
VASP_171.vasp	-6.79531	-6.82744	0.0321309	VASP_171.vasp	-6.79531	-6.84955	0.0542432
VASP_58.vasp	-6.78286	-6.81393	0.0310665	VASP_58.vasp	-6.78286	-6.85075	0.0678874
VASP_46.vasp	-6.81442	-6.87371	0.0592976	VASP_46.vasp	-6.81442	-6.86422	0.0498033
VASP_121.vasp	-6.77918	-6.83839	0.0592123	VASP_121.vasp	-6.77918	-6.84913	0.0699566
VASP_23.vasp	-6.80209	-6.85381	0.0517285	VASP_23.vasp	-6.80209	-6.84987	0.0477828
VASP_26.vasp	-6.78162	-6.85553	0.0739176	VASP_26.vasp	-6.78162	-6.87116	0.0895473
VASP_239.vasp	-6.79581	-6.82766	0.0318485	VASP_239.vasp	-6.79581	-6.84955	0.0537367
VASP_260.vasp	-6.79581	-6.82766	0.0318484	VASP_260.vasp	-6.79581	-6.84954	0.0537364
VASP_27.vasp	-6.80209	-6.85381	0.0517291	VASP_27.vasp	-6.80209	-6.84987	0.047787
VASP_272.vasp	-6.78286	-6.81392	0.0310652	VASP_272.vasp	-6.78286	-6.85074	0.0678835
VASP_51.vasp	-6.78462	-6.86483	0.080205	VASP_51.vasp	-6.78462	-6.8495	0.0648782
VASP_93.vasp	-6.80421	-6.84551	0.0412945	VASP_93.vasp	-6.80421	-6.85905	0.0548366
VASP_163.vasp	-6.79531	-6.82744	0.0321306	VASP_163.vasp	-6.79531	-6.84956	0.0542467
VASP_48.vasp	-6.79531	-6.82744	0.0321291	VASP_48.vasp	-6.79531	-6.84955	0.0542421
VASP_198.vasp	-6.77918	-6.83839	0.0592129	VASP_198.vasp	-6.77918	-6.84913	0.069957
VASP_122.vasp	-6.79004	-6.81192	0.021882	VASP_122.vasp	-6.79004	-6.85168	0.06164
VASP_32.vasp	-6.79367	-6.82652	0.0328483	VASP_32.vasp	-6.79367	-6.84535	0.0516846
VASP_297.vasp	-6.78286	-6.81393	0.0310668	VASP_297.vasp	-6.78286	-6.85075	0.0678868
VASP_31.vasp	-6.79531	-6.82744	0.0321298	VASP_31.vasp	-6.79531	-6.84955	0.0542422
VASP_179.vasp	-6.80421	-6.84551	0.0412948	VASP_179.vasp	-6.80421	-6.85905	0.0548398
VASP_229.vasp	-6.79279	-6.82601	0.0332234	VASP_229.vasp	-6.79279	-6.84521	0.0524208
VASP_44.vasp	-6.79004	-6.81187	0.0218267	VASP_44.vasp	-6.79004	-6.85163	0.061587
VASP_199.vasp	-6.80424	-6.84156	0.0373265	VASP_199.vasp	-6.80424	-6.84197	0.037735
VASP_191.vasp	-6.80424	-6.84156	0.0373252	VASP_191.vasp	-6.80424	-6.84197	0.0377327
VASP_223.vasp	-6.80209	-6.85382	0.0517295	VASP_223.vasp	-6.80209	-6.84987	0.0477853
VASP_254.vasp	-6.80424	-6.84156	0.0373242	VASP_254.vasp	-6.80424	-6.84197	0.0377338
VASP_120.vasp	-6.80209	-6.85382	0.051729	VASP_120.vasp	-6.80209	-6.84987	0.0477839
VASP_194.vasp	-6.80424	-6.84156	0.0373256	VASP_194.vasp	-6.80424	-6.84197	0.0377341
VASP_299.vasp	-6.79367	-6.82652	0.0328483	VASP_299.vasp	-6.79367	-6.84535	0.0516825
VASP_189.vasp	-6.80209	-6.85382	0.0517294	VASP_189.vasp	-6.80209	-6.84987	0.0477841
VASP_277.vasp	-6.78286	-6.81393	0.0310673	VASP_277.vasp	-6.78286	-6.85075	0.0678862
VASP_118.vasp	-6.77918	-6.83839	0.0592116	VASP_118.vasp	-6.77918	-6.84913	0.0699584
VASP_162.vasp	-6.79593	-6.83937	0.0434345	VASP_162.vasp	-6.79593	-6.83649	0.0405539
VASP_151.vasp	-6.77918	-6.83839	0.0592129	VASP_151.vasp	-6.77918	-6.84913	0.0699563
VASP_11.vasp	-6.79531	-6.82744	0.0321298	VASP_11.vasp	-6.79531	-6.84955	0.054241
VASP_97.vasp	-6.77918	-6.83839	0.0592098	VASP_97.vasp	-6.77918	-6.84913	0.0699567
VASP_195.vasp	-6.79279	-6.82601	0.0332241	VASP_195.vasp	-6.79279	-6.84521	0.052421
VASP_220.vasp	-6.80424	-6.84157	0.0373269	VASP_220.vasp	-6.80424	-6.84197	0.0377354
VASP_202.vasp	-6.80209	-6.85381	0.0517291	VASP_202.vasp	-6.80209	-6.84987	0.0477853
VASP_17.vasp	-6.80421	-6.8455	0.0412935	VASP_17.vasp	-6.80421	-6.85905	0.0548364
VASP_190.vasp	-6.80424	-6.84156	0.0373252	VASP_190.vasp	-6.80424	-6.84197	0.0377317
VASP_36.vasp	-6.79581	-6.82766	0.0318491	VASP_36.vasp	-6.79581	-6.84955	0.0537402
VASP_84.vasp	-6.80378	-6.84349	0.0397096	VASP_84.vasp	-6.80378	-6.84644	0.0426623
VASP_89.vasp	-6.77918	-6.83839	0.0592123	VASP_89.vasp	-6.77918	-6.84913	0.0699584
VASP_169.vasp	-6.78286	-6.81393	0.0310673	VASP_169.vasp	-6.78286	-6.85074	0.0678843
VASP_291.vasp	-6.77918	-6.83839	0.0592123	VASP_291.vasp	-6.77918	-6.84913	0.0699573
VASP_256.vasp	-6.80209	-6.85382	0.0517291	VASP_256.vasp	-6.80209	-6.84987	0.0477849
VASP_219.vasp	-6.80378	-6.84341	0.0396317	VASP_219.vasp	-6.80378	-6.84637	0.0425941
VASP_242.vasp	-6.81442	-6.87376	0.0593394	VASP_242.vasp	-6.81442	-6.86426	0.0498401
VASP_215.vasp	-6.79279	-6.82601	0.0332238	VASP_215.vasp	-6.79279	-6.84521	0.0524215
VASP_123.vasp	-6.80424	-6.84156	0.0373266	VASP_123.vasp	-6.80424	-6.84197	0.0377333
VASP_208.vasp	-6.80421	-6.84551	0.0412947	VASP_208.vasp	-6.80421	-6.85905	0.0548373
VASP_141.vasp	-6.80778	-6.84343	0.0356551	VASP_141.vasp	-6.80778	-6.84715	0.0393721
VASP_172.vasp	-6.79531	-6.82744	0.0321284	VASP_172.vasp	-6.79531	-6.84955	0.0542408
VASP_113.vasp	-6.79279	-6.82601	0.0332229	VASP_113.vasp	-6.79279	-6.84521	0.0524211
VASP_273.vasp	-6.77918	-6.83839	0.0592106	VASP_273.vasp	-6.77918	-6.84913	0.0699578
VASP_49.vasp	-6.78674	-6.82701	0.0402682	VASP_49.vasp	-6.78674	-6.8575	0.0707568
VASP_255.vasp	-6.80424	-6.84156	0.0373258	VASP_255.vasp	-6.80424	-6.84197	0.0377327
VASP_230.vasp	-6.79581	-6.82766	0.0318483	VASP_230.vasp	-6.79581	-6.84955	0.0537386
VASP_204.vasp	-6.8013	-6.84017	0.0388697	VASP_204.vasp	-6.8013	-6.83738	0.0360807
VASP_16.vasp	-6.80209	-6.85382	0.0517297	VASP_16.vasp	-6.80209	-6.84987	0.0477849
VASP_110.vasp	-6.78162	-6.85553	0.0739176	VASP_110.vasp	-6.78162	-6.87116	0.089548
VASP_77.vasp	-6.79004	-6.81192	0.021882	VASP_77.vasp	-6.79004	-6.85168	0.0616388
VASP_160.vasp	-6.8013	-6.84018	0.038875	VASP_160.vasp	-6.8013	-6.83739	0.036084
VASP_186.vasp	-6.79581	-6.82766	0.0318505	VASP_186.vasp	-6.79581	-6.84954	0.053736
VASP_241.vasp	-6.80209	-6.85382	0.0517288	VASP_241.vasp	-6.80209	-6.84987	0.0477873
VASP_8.vasp	-6.77918	-6.83839	0.0592104	VASP_8.vasp	-6.77918	-6.84913	0.0699572
VASP_143.vasp	-6.77918	-6.83839	0.0592103	VASP_143.vasp	-6.77918	-6.84913	0.0699568
VASP_24.vasp	-6.79367	-6.82652	0.0328482	VASP_24.vasp	-6.79367	-6.84535	0.0516853
VASP_289.vasp	-6.79581	-6.82766	0.0318498	VASP_289.vasp	-6.79581	-6.84955	0.0537377
VASP_168.vasp	-6.80209	-6.85382	0.0517288	VASP_168.vasp	-6.80209	-6.84987	0.0477842
VASP_66.vasp	-6.78286	-6.81393	0.031066	VASP_66.vasp	-6.78286	-6.85074	0.067883
VASP_54.vasp	-6.79581	-6.82766	0.0318494	VASP_54.vasp	-6.79581	-6.84955	0.0537371
VASP_240.vasp	-6.79279	-6.82601	0.0332241	VASP_240.vasp	-6.79279	-6.84521	0.0524227
VASP_286.vasp	-6.80778	-6.84364	0.0358648	VASP_286.vasp	-6.80778	-6.84728	0.0394989
VASP_288.vasp	-6.79367	-6.82652	0.0328486	VASP_288.vasp	-6.79367	-6.84535	0.0516835
VASP_45.vasp	-6.77918	-6.83839	0.0592123	VASP_45.vasp	-6.77918	-6.84913	0.0699581
VASP_104.vasp	-6.77918	-6.83839	0.0592108	VASP_104.vasp	-6.77918	-6.84913	0.0699569
VASP_161.vasp	-6.77022	-6.82634	0.0561124	VASP_161.vasp	-6.77022	-6.85578	0.0855616
VASP_283.vasp	-6.79279	-6.82601	0.0332233	VASP_283.vasp	-6.79279	-6.84521	0.0524202
VASP_138.vasp	-6.78462	-6.86483	0.080204	VASP_138.vasp	-6.78462	-6.8495	0.064877
VASP_280.vasp	-6.77918	-6.83839	0.059211	VASP_280.vasp	-6.77918	-6.84913	0.069959
VASP_247.vasp	-6.79581	-6.82766	0.0318502	VASP_247.vasp	-6.79581	-6.84954	0.0537366
VASP_130.vasp	-6.79531	-6.82744	0.0321284	VASP_130.vasp	-6.79531	-6.84956	0.0542439
VASP_105.vasp	-6.79045	-6.81208	0.0216311	VASP_105.vasp	-6.79045	-6.85174	0.061294
VASP_270.vasp	-6.79367	-6.82651	0.0328461	VASP_270.vasp	-6.79367	-6.84535	0.0516809
VASP_178.vasp	-6.79531	-6.82744	0.0321291	VASP_178.vasp	-6.79531	-6.84955	0.0542426
VASP_238.vasp	-6.77918	-6.83839	0.0592116	VASP_238.vasp	-6.77918	-6.84913	0.0699564
VASP_249.vasp	-6.79531	-6.82744	0.0321296	VASP_249.vasp	-6.79531	-6.84955	0.0542415
VASP_155.vasp	-6.78286	-6.81392	0.0310652	VASP_155.vasp	-6.78286	-6.85074	0.067885
VASP_200.vasp	-6.79531	-6.82744	0.0321288	VASP_200.vasp	-6.79531	-6.84955	0.0542418
VASP_258.vasp	-6.79279	-6.82601	0.0332238	VASP_258.vasp	-6.79279	-6.84521	0.0524208
VASP_167.vasp	-6.80209	-6.85381	0.0517282	VASP_167.vasp	-6.80209	-6.84987	0.0477847
VASP_287.vasp	-6.80209	-6.85382	0.0517294	VASP_287.vasp	-6.80209	-6.84987	0.0477849
VASP_157.vasp	-6.79279	-6.82601	0.0332224	VASP_157.vasp	-6.79279	-6.84521	0.0524219
VASP_109.vasp	-6.78286	-6.81393	0.0310668	VASP_109.vasp	-6.78286	-6.85074	0.0678829
VASP_15.vasp	-6.79531	-6.82744	0.0321284	VASP_15.vasp	-6.79531	-6.84955	0.0542429
VASP_10.vasp	-6.79581	-6.82765	0.031847	VASP_10.vasp	-6.79581	-6.84955	0.0537378
VASP_47.vasp	-6.79279	-6.82601	0.0332233	VASP_47.vasp	-6.79279	-6.84521	0.0524195
VASP_226.vasp	-6.79581	-6.82766	0.0318496	VASP_226.vasp	-6.79581	-6.84955	0.0537387
VASP_76.vasp	-6.77918	-6.83839	0.0592123	VASP_76.vasp	-6.77918	-6.84913	0.0699573
VASP_135.vasp	-6.80378	-6.84348	0.039702	VASP_135.vasp	-6.80378	-6.84644	0.0426557
VASP_209.vasp	-6.79367	-6.82651	0.0328475	VASP_209.vasp	-6.79367	-6.84535	0.0516836
VASP_170.vasp	-6.8013	-6.84018	0.0388735	VASP_170.vasp	-6.8013	-6.83738	0.0360822
VASP_159.vasp	-6.80209	-6.85381	0.0517287	VASP_159.vasp	-6.80209	-6.84987	0.0477855
VASP_292.vasp	-6.79531	-6.82744	0.0321276	VASP_292.vasp	-6.79531	-6.84956	0.0542447
VASP_92.vasp	-6.79581	-6.82766	0.0318486	VASP_92.vasp	-6.79581	-6.84954	0.0537363
VASP_156.vasp	-6.79531	-6.82744	0.0321278	VASP_156.vasp	-6.79531	-6.84956	0.0542442
VASP_101.vasp	-6.80209	-6.85382	0.0517296	VASP_101.vasp	-6.80209	-6.84987	0.0477883
VASP_298.vasp	-6.77918	-6.83839	0.0592127	VASP_298.vasp	-6.77918	-6.84913	0.0699584
VASP_233.vasp	-6.80421	-6.84551	0.041296	VASP_233.vasp	-6.80421	-6.85905	0.0548404
VASP_72.vasp	-6.80421	-6.8455	0.0412944	VASP_72.vasp	-6.80421	-6.85905	0.0548391
VASP_142.vasp	-6.79004	-6.81192	0.0218795	VASP_142.vasp	-6.79004	-6.85168	0.0616357
VASP_88.vasp	-6.80421	-6.84551	0.0412962	VASP_88.vasp	-6.80421	-6.85905	0.0548396
VASP_131.vasp	-6.77918	-6.83839	0.059211	VASP_131.vasp	-6.77918	-6.84913	0.0699545
VASP_222.vasp	-6.79279	-6.82601	0.0332233	VASP_222.vasp	-6.79279	-6.84521	0.0524213
VASP_266.vasp	-6.79279	-6.82601	0.0332233	VASP_266.vasp	-6.79279	-6.84521	0.0524206
VASP_285.vasp	-6.79367	-6.82651	0.0328469	VASP_285.vasp	-6.79367	-6.84535	0.0516797
VASP_206.vasp	-6.80378	-6.8434	0.0396206	VASP_206.vasp	-6.80378	-6.84636	0.0425816
VASP_207.vasp	-6.78161	-6.85537	0.0737572	VASP_207.vasp	-6.78161	-6.87116	0.0895493
VASP_126.vasp	-6.80424	-6.84156	0.0373268	VASP_126.vasp	-6.80424	-6.84197	0.0377357
VASP_7.vasp	-6.80421	-6.8455	0.0412935	VASP_7.vasp	-6.80421	-6.85905	0.0548374
VASP_296.vasp	-6.79367	-6.82651	0.0328478	VASP_296.vasp	-6.79367	-6.84535	0.0516829
VASP_107.vasp	-6.80209	-6.85382	0.0517294	VASP_107.vasp	-6.80209	-6.84987	0.0477849
VASP_6.vasp	-6.77918	-6.83839	0.0592113	VASP_6.vasp	-6.77918	-6.84913	0.069957
VASP_176.vasp	-6.80209	-6.85382	0.0517296	VASP_176.vasp	-6.80209	-6.84987	0.0477853
VASP_269.vasp	-6.79367	-6.82651	0.0328476	VASP_269.vasp	-6.79367	-6.84535	0.0516808
VASP_218.vasp	-6.79367	-6.82651	0.0328475	VASP_218.vasp	-6.79367	-6.84535	0.0516808
VASP_2.vasp	-6.79367	-6.82651	0.0328469	VASP_2.vasp	-6.79367	-6.84535	0.0516822
VASP_9.vasp	-6.77918	-6.83839	0.0592108	VASP_9.vasp	-6.77918	-6.84913	0.0699573
VASP_133.vasp	-6.80421	-6.84551	0.0412956	VASP_133.vasp	-6.80421	-6.85905	0.0548399
VASP_94.vasp	-6.77918	-6.83839	0.0592129	VASP_94.vasp	-6.77918	-6.84913	0.0699556
VASP_228.vasp	-6.79367	-6.82652	0.0328484	VASP_228.vasp	-6.79367	-6.84535	0.0516832
VASP_205.vasp	-6.81442	-6.87376	0.0593398	VASP_205.vasp	-6.81442	-6.86426	0.0498418
VASP_224.vasp	-6.78461	-6.86479	0.0801773	VASP_224.vasp	-6.78461	-6.84946	0.0648501
VASP_188.vasp	-6.78674	-6.82667	0.0399337	VASP_188.vasp	-6.78674	-6.8571	0.0703653
VASP_243.vasp	-6.80778	-6.84357	0.0357846	VASP_243.vasp	-6.80778	-6.8472	0.0394198
VASP_180.vasp	-6.77918	-6.83839	0.0592124	VASP_180.vasp	-6.77918	-6.84913	0.0699591
VASP_108.vasp	-6.8013	-6.84018	0.0388735	VASP_108.vasp	-6.8013	-6.83738	0.0360822
VASP_152.vasp	-6.79279	-6.82601	0.0332233	VASP_152.vasp	-6.79279	-6.8452	0.0524194
VASP_192.vasp	-6.80209	-6.85382	0.0517293	VASP_192.vasp	-6.80209	-6.84987	0.0477847
VASP_59.vasp	-6.80421	-6.8455	0.0412944	VASP_59.vasp	-6.80421	-6.85905	0.0548391
VASP_177.vasp	-6.78286	-6.81393	0.0310658	VASP_177.vasp	-6.78286	-6.85074	0.0678829
VASP_29.vasp	-6.79279	-6.82601	0.033223	VASP_29.vasp	-6.79279	-6.84521	0.0524208
VASP_117.vasp	-6.79367	-6.82652	0.0328492	VASP_117.vasp	-6.79367	-6.84535	0.0516832
VASP_65.vasp	-6.8013	-6.83999	0.0386917	VASP_65.vasp	-6.8013	-6.8372	0.0359036
VASP_132.vasp	-6.78286	-6.81393	0.0310671	VASP_132.vasp	-6.78286	-6.85075	0.0678865
VASP_166.vasp	-6.78286	-6.81393	0.0310665	VASP_166.vasp	-6.78286	-6.85075	0.0678867
VASP_43.vasp	-6.80424	-6.84156	0.0373263	VASP_43.vasp	-6.80424	-6.84197	0.0377338
VASP_265.vasp	-6.79531	-6.82744	0.0321295	VASP_265.vasp	-6.79531	-6.84955	0.0542429
VASP_282.vasp	-6.77918	-6.83839	0.0592129	VASP_282.vasp	-6.77918	-6.84913	0.069957
VASP_95.vasp	-6.77918	-6.83839	0.0592106	VASP_95.vasp	-6.77918	-6.84913	0.0699578
VASP_244.vasp	-6.79531	-6.82744	0.0321306	VASP_244.vasp	-6.79531	-6.84955	0.054243
VASP_278.vasp	-6.80378	-6.8434	0.0396177	VASP_278.vasp	-6.80378	-6.84637	0.0425843
VASP_112.vasp	-6.8013	-6.84018	0.0388748	VASP_112.vasp	-6.8013	-6.83739	0.0360829
VASP_37.vasp	-6.80421	-6.84551	0.0412949	VASP_37.vasp	-6.80421	-6.85905	0.054837
VASP_187.vasp	-6.79531	-6.82744	0.0321299	VASP_187.vasp	-6.79531	-6.84955	0.0542435
VASP_173.vasp	-6.77918	-6.83839	0.0592115	VASP_173.vasp	-6.77918	-6.84913	0.0699574
VASP_235.vasp	-6.78286	-6.81392	0.0310646	VASP_235.vasp	-6.78286	-6.85074	0.067883
VASP_214.vasp	-6.80778	-6.84344	0.0356678	VASP_214.vasp	-6.80778	-6.84716	0.0393842
VASP_20.vasp	-6.78286	-6.81393	0.0310665	VASP_20.vasp	-6.78286	-6.85074	0.0678849
VASP_149.vasp	-6.80424	-6.84156	0.0373256	VASP_149.vasp	-6.80424	-6.84197	0.0377329

## Sheet: Swaps-CoCrFeNi
structure	DFT Total energy/atom	DIEP Total energy/atom	DIEP Abs(error)	structure	DFT Total energy/atom	M3GNET Total energy/atom	M3GNET Abs(error)
VASP_52.vasp	-7.44488	-7.57666	0.131786	VASP_52.vasp	-7.44488	-7.49051	0.0456365
VASP_90.vasp	-7.50095	-7.61189	0.110945	VASP_90.vasp	-7.50095	-7.5243	0.0233544
VASP_137.vasp	-7.44537	-7.57673	0.131354	VASP_137.vasp	-7.44537	-7.49065	0.0452724
VASP_197.vasp	-7.45867	-7.58464	0.125976	VASP_197.vasp	-7.45867	-7.49634	0.0376706
VASP_232.vasp	-7.46093	-7.54622	0.0852962	VASP_232.vasp	-7.46093	-7.43727	0.0236577
VASP_83.vasp	-7.50631	-7.58746	0.081148	VASP_83.vasp	-7.50631	-7.51298	0.00666776
VASP_262.vasp	-7.50735	-7.48535	0.0219903	VASP_262.vasp	-7.50735	-7.38312	0.124225
VASP_80.vasp	-7.47667	-7.51135	0.0346777	VASP_80.vasp	-7.47667	-7.40196	0.0747174
VASP_69.vasp	-7.4535	-7.5738	0.120304	VASP_69.vasp	-7.4535	-7.45876	0.00526338
VASP_134.vasp	-7.43917	-7.54728	0.108109	VASP_134.vasp	-7.43917	-7.44842	0.00925517
VASP_0.vasp	-7.44877	-7.5944	0.145626	VASP_0.vasp	-7.44877	-7.47929	0.0305206
VASP_216.vasp	-7.50095	-7.61129	0.110337	VASP_216.vasp	-7.50095	-7.52376	0.0228083
VASP_55.vasp	-7.50095	-7.61169	0.110743	VASP_55.vasp	-7.50095	-7.52412	0.0231712
VASP_56.vasp	-7.50095	-7.611	0.110052	VASP_56.vasp	-7.50095	-7.52351	0.0225643
VASP_61.vasp	-7.47668	-7.51099	0.0343147	VASP_61.vasp	-7.47668	-7.40182	0.0748575
VASP_85.vasp	-7.44489	-7.57645	0.131559	VASP_85.vasp	-7.44489	-7.49024	0.0453561
VASP_114.vasp	-7.47498	-7.50846	0.0334747	VASP_114.vasp	-7.47498	-7.40046	0.0745214
VASP_210.vasp	-7.50631	-7.58831	0.0819968	VASP_210.vasp	-7.50631	-7.5137	0.00738611
VASP_271.vasp	-7.44877	-7.59247	0.143695	VASP_271.vasp	-7.44877	-7.47756	0.0287859
VASP_259.vasp	-7.45965	-7.5841	0.124451	VASP_259.vasp	-7.45965	-7.4967	0.0370519
VASP_181.vasp	-7.44919	-7.59283	0.143635	VASP_181.vasp	-7.44919	-7.47872	0.029525
VASP_67.vasp	-7.50095	-7.61187	0.110919	VASP_67.vasp	-7.50095	-7.52427	0.0233236
VASP_217.vasp	-7.45058	-7.5624	0.111821	VASP_217.vasp	-7.45058	-7.46564	0.0150517
VASP_60.vasp	-7.44919	-7.59278	0.14359	VASP_60.vasp	-7.44919	-7.4787	0.0295126
VASP_119.vasp	-7.46872	-7.54368	0.0749603	VASP_119.vasp	-7.46872	-7.43171	0.0370089
VASP_183.vasp	-7.4732	-7.52769	0.0544862	VASP_183.vasp	-7.4732	-7.38614	0.0870596
VASP_103.vasp	-7.45501	-7.57132	0.116312	VASP_103.vasp	-7.45501	-7.4804	0.0253901
VASP_14.vasp	-7.46872	-7.54417	0.0754447	VASP_14.vasp	-7.46872	-7.43208	0.0366386
VASP_148.vasp	-7.44489	-7.57632	0.131433	VASP_148.vasp	-7.44489	-7.49014	0.0452501
VASP_257.vasp	-7.46872	-7.54541	0.0766907	VASP_257.vasp	-7.46872	-7.43305	0.0356664
VASP_294.vasp	-7.49952	-7.4828	0.0167208	VASP_294.vasp	-7.49952	-7.38897	0.110553
VASP_295.vasp	-7.47499	-7.50883	0.0338427	VASP_295.vasp	-7.47499	-7.4008	0.0741894
VASP_115.vasp	-7.44919	-7.59253	0.143338	VASP_115.vasp	-7.44919	-7.47844	0.0292534
VASP_250.vasp	-7.50308	-7.57106	0.0679894	VASP_250.vasp	-7.50308	-7.49159	0.0114813
VASP_74.vasp	-7.49952	-7.48199	0.0175273	VASP_74.vasp	-7.49952	-7.38844	0.111081
VASP_42.vasp	-7.50095	-7.61215	0.111199	VASP_42.vasp	-7.50095	-7.52452	0.0235649
VASP_79.vasp	-7.44537	-7.58254	0.137174	VASP_79.vasp	-7.44537	-7.48486	0.0394939
VASP_82.vasp	-7.44489	-7.57614	0.131256	VASP_82.vasp	-7.44489	-7.48996	0.0450712
VASP_62.vasp	-7.44877	-7.59245	0.143677	VASP_62.vasp	-7.44877	-7.47756	0.0287869
VASP_252.vasp	-7.50095	-7.61193	0.110973	VASP_252.vasp	-7.50095	-7.52433	0.0233799
VASP_106.vasp	-7.44877	-7.59241	0.143632	VASP_106.vasp	-7.44877	-7.47752	0.0287465
VASP_175.vasp	-7.45496	-7.57347	0.118511	VASP_175.vasp	-7.45496	-7.48204	0.0270868
VASP_184.vasp	-7.44539	-7.57687	0.131474	VASP_184.vasp	-7.44539	-7.49064	0.0452493
VASP_139.vasp	-7.44488	-7.5767	0.131817	VASP_139.vasp	-7.44488	-7.49055	0.0456673
VASP_33.vasp	-7.45058	-7.56208	0.111499	VASP_33.vasp	-7.45058	-7.46535	0.0147677
VASP_86.vasp	-7.46872	-7.54435	0.0756332	VASP_86.vasp	-7.46872	-7.43223	0.0364954
VASP_64.vasp	-7.46872	-7.54377	0.0750483	VASP_64.vasp	-7.46872	-7.43177	0.0369507
VASP_185.vasp	-7.49897	-7.61337	0.114397	VASP_185.vasp	-7.49897	-7.50283	0.00386422
VASP_25.vasp	-7.46093	-7.5462	0.0852766	VASP_25.vasp	-7.46093	-7.43725	0.0236803
VASP_5.vasp	-7.47668	-7.5114	0.034719	VASP_5.vasp	-7.47668	-7.402	0.0746735
VASP_124.vasp	-7.46872	-7.54423	0.0755059	VASP_124.vasp	-7.46872	-7.43214	0.0365834
VASP_182.vasp	-7.44012	-7.58473	0.144607	VASP_182.vasp	-7.44012	-7.4676	0.0274827
VASP_145.vasp	-7.44537	-7.58207	0.1367	VASP_145.vasp	-7.44537	-7.48445	0.0390845
VASP_164.vasp	-7.50095	-7.61114	0.110188	VASP_164.vasp	-7.50095	-7.52364	0.0226848
VASP_73.vasp	-7.46093	-7.54622	0.0852939	VASP_73.vasp	-7.46093	-7.43728	0.0236507
VASP_19.vasp	-7.44489	-7.57628	0.13139	VASP_19.vasp	-7.44489	-7.49009	0.0452066
VASP_253.vasp	-7.44537	-7.58194	0.136569	VASP_253.vasp	-7.44537	-7.48435	0.0389717
VASP_57.vasp	-7.44919	-7.59204	0.142854	VASP_57.vasp	-7.44919	-7.47804	0.0288508
VASP_279.vasp	-7.44877	-7.59259	0.143812	VASP_279.vasp	-7.44877	-7.47762	0.0288458
VASP_146.vasp	-7.45058	-7.56233	0.111751	VASP_146.vasp	-7.45058	-7.46558	0.0150019
VASP_267.vasp	-7.48227	-7.4917	0.00942813	VASP_267.vasp	-7.48227	-7.41179	0.0704773
VASP_99.vasp	-7.46093	-7.5456	0.0846743	VASP_99.vasp	-7.46093	-7.43675	0.0241779
VASP_203.vasp	-7.49271	-7.54648	0.0537679	VASP_203.vasp	-7.49271	-7.43545	0.0572614
VASP_127.vasp	-7.49951	-7.48201	0.0175093	VASP_127.vasp	-7.49951	-7.38843	0.111089
VASP_225.vasp	-7.44538	-7.57635	0.130971	VASP_225.vasp	-7.44538	-7.49029	0.0449125
VASP_275.vasp	-7.43917	-7.54733	0.108155	VASP_275.vasp	-7.43917	-7.44845	0.00927283
VASP_78.vasp	-7.44919	-7.59252	0.143332	VASP_78.vasp	-7.44919	-7.47843	0.0292413
VASP_246.vasp	-7.46093	-7.5462	0.0852789	VASP_246.vasp	-7.46093	-7.43726	0.0236643
VASP_153.vasp	-7.44537	-7.58231	0.136935	VASP_153.vasp	-7.44537	-7.4847	0.0393223
VASP_290.vasp	-7.50095	-7.61219	0.11124	VASP_290.vasp	-7.50095	-7.52457	0.0236258
VASP_71.vasp	-7.50631	-7.58713	0.0808125	VASP_71.vasp	-7.50631	-7.51269	0.00638023
VASP_18.vasp	-7.44536	-7.58211	0.136747	VASP_18.vasp	-7.44536	-7.48468	0.0393223
VASP_237.vasp	-7.46896	-7.54073	0.0717647	VASP_237.vasp	-7.46896	-7.42992	0.0390431
VASP_70.vasp	-7.47668	-7.51135	0.0346758	VASP_70.vasp	-7.47668	-7.40196	0.0747114
VASP_28.vasp	-7.4719	-7.52716	0.0552592	VASP_28.vasp	-7.4719	-7.38622	0.0856776
VASP_276.vasp	-7.50095	-7.61211	0.111159	VASP_276.vasp	-7.50095	-7.5245	0.0235473
VASP_251.vasp	-7.47667	-7.51136	0.0346878	VASP_251.vasp	-7.47667	-7.40197	0.0747076
VASP_263.vasp	-7.45867	-7.58445	0.125779	VASP_263.vasp	-7.45867	-7.49617	0.0374982
VASP_22.vasp	-7.44537	-7.58212	0.136744	VASP_22.vasp	-7.44537	-7.48455	0.039179
VASP_12.vasp	-7.44538	-7.57701	0.131628	VASP_12.vasp	-7.44538	-7.4909	0.0455184
VASP_248.vasp	-7.50095	-7.61238	0.111428	VASP_248.vasp	-7.50095	-7.52473	0.0237811
VASP_231.vasp	-7.47499	-7.50839	0.0334084	VASP_231.vasp	-7.47499	-7.40058	0.0744085
VASP_165.vasp	-7.50095	-7.61144	0.110491	VASP_165.vasp	-7.50095	-7.52389	0.0229423
VASP_91.vasp	-7.47498	-7.50887	0.0338899	VASP_91.vasp	-7.47498	-7.40085	0.0741307
VASP_212.vasp	-7.49897	-7.61348	0.114501	VASP_212.vasp	-7.49897	-7.50293	0.00395812
VASP_1.vasp	-7.46093	-7.54622	0.0852973	VASP_1.vasp	-7.46093	-7.43726	0.0236661
VASP_75.vasp	-7.50095	-7.61195	0.110999	VASP_75.vasp	-7.50095	-7.52434	0.0233873
VASP_68.vasp	-7.49897	-7.61342	0.114445	VASP_68.vasp	-7.49897	-7.50288	0.00390394
VASP_236.vasp	-7.49952	-7.48279	0.0167253	VASP_236.vasp	-7.49952	-7.38897	0.110553
VASP_34.vasp	-7.44537	-7.58209	0.136725	VASP_34.vasp	-7.44537	-7.48451	0.0391396
VASP_53.vasp	-7.45867	-7.58425	0.125583	VASP_53.vasp	-7.45867	-7.49599	0.0373194
VASP_125.vasp	-7.44919	-7.59234	0.14315	VASP_125.vasp	-7.44919	-7.47826	0.0290756
VASP_98.vasp	-7.50095	-7.61114	0.110186	VASP_98.vasp	-7.50095	-7.52363	0.0226781
VASP_274.vasp	-7.44488	-7.57639	0.131513	VASP_274.vasp	-7.44488	-7.49024	0.0453608
VASP_35.vasp	-7.46872	-7.54374	0.0750243	VASP_35.vasp	-7.46872	-7.43175	0.0369717
VASP_129.vasp	-7.44537	-7.58236	0.136994	VASP_129.vasp	-7.44537	-7.48476	0.0393933
VASP_261.vasp	-7.49951	-7.482	0.0175189	VASP_261.vasp	-7.49951	-7.3884	0.11111
VASP_100.vasp	-7.44537	-7.58223	0.136864	VASP_100.vasp	-7.44537	-7.48464	0.039265
VASP_234.vasp	-7.47668	-7.51133	0.0346572	VASP_234.vasp	-7.47668	-7.40194	0.0747351
VASP_158.vasp	-7.44492	-7.57586	0.13094	VASP_158.vasp	-7.44492	-7.48975	0.0448316
VASP_128.vasp	-7.50095	-7.6109	0.109949	VASP_128.vasp	-7.50095	-7.52343	0.0224848
VASP_41.vasp	-7.4732	-7.52832	0.0551177	VASP_41.vasp	-7.4732	-7.38651	0.0866922
VASP_4.vasp	-7.47496	-7.50798	0.0330226	VASP_4.vasp	-7.47496	-7.39993	0.0750277
VASP_171.vasp	-7.4732	-7.52643	0.0532267	VASP_171.vasp	-7.4732	-7.38507	0.0881279
VASP_58.vasp	-7.44537	-7.58212	0.136751	VASP_58.vasp	-7.44537	-7.48453	0.0391551
VASP_46.vasp	-7.44877	-7.59227	0.143498	VASP_46.vasp	-7.44877	-7.47735	0.0285866
VASP_121.vasp	-7.50095	-7.61256	0.111612	VASP_121.vasp	-7.50095	-7.52489	0.023935
VASP_23.vasp	-7.48227	-7.49185	0.00957784	VASP_23.vasp	-7.48227	-7.41193	0.0703411
VASP_26.vasp	-7.44218	-7.60343	0.161249	VASP_26.vasp	-7.44218	-7.45298	0.0108033
VASP_260.vasp	-7.46093	-7.5456	0.0846732	VASP_260.vasp	-7.46093	-7.43676	0.0241705
VASP_27.vasp	-7.50095	-7.61103	0.110087	VASP_27.vasp	-7.50095	-7.52354	0.0225921
VASP_272.vasp	-7.44578	-7.55691	0.111126	VASP_272.vasp	-7.44578	-7.44152	0.00425819
VASP_196.vasp	-7.46093	-7.54567	0.0847412	VASP_196.vasp	-7.46093	-7.43672	0.024211
VASP_51.vasp	-7.50192	-7.50453	0.00261365	VASP_51.vasp	-7.50192	-7.40082	0.101102
VASP_93.vasp	-7.46093	-7.54564	0.0847154	VASP_93.vasp	-7.46093	-7.43669	0.0242396
VASP_163.vasp	-7.48226	-7.49158	0.00931426	VASP_163.vasp	-7.48226	-7.41172	0.0705437
VASP_293.vasp	-7.50095	-7.61193	0.110982	VASP_293.vasp	-7.50095	-7.52435	0.023399
VASP_198.vasp	-7.44489	-7.5763	0.131412	VASP_198.vasp	-7.44489	-7.49011	0.0452245
VASP_122.vasp	-7.45501	-7.57129	0.116283	VASP_122.vasp	-7.45501	-7.48047	0.0254669
VASP_32.vasp	-7.50095	-7.61193	0.110973	VASP_32.vasp	-7.50095	-7.52432	0.0233693
VASP_297.vasp	-7.49951	-7.48201	0.0175078	VASP_297.vasp	-7.49951	-7.38842	0.111091
VASP_21.vasp	-7.46093	-7.54584	0.0849161	VASP_21.vasp	-7.46093	-7.43696	0.0239669
VASP_31.vasp	-7.47668	-7.51138	0.0347016	VASP_31.vasp	-7.47668	-7.40198	0.0746982
VASP_40.vasp	-7.44919	-7.5915	0.142305	VASP_40.vasp	-7.44919	-7.47748	0.028288
VASP_179.vasp	-7.49952	-7.48199	0.017527	VASP_179.vasp	-7.49952	-7.38842	0.1111
VASP_229.vasp	-7.44218	-7.60245	0.160272	VASP_229.vasp	-7.44218	-7.45208	0.00990428
VASP_199.vasp	-7.50095	-7.6115	0.110554	VASP_199.vasp	-7.50095	-7.52395	0.0230025
VASP_191.vasp	-7.47496	-7.50797	0.0330052	VASP_191.vasp	-7.47496	-7.39987	0.0750932
VASP_254.vasp	-7.46872	-7.54418	0.0754579	VASP_254.vasp	-7.46872	-7.43211	0.0366097
VASP_120.vasp	-7.47668	-7.51136	0.0346809	VASP_120.vasp	-7.47668	-7.40196	0.0747148
VASP_194.vasp	-7.44877	-7.59251	0.143738	VASP_194.vasp	-7.44877	-7.47761	0.0288384
VASP_299.vasp	-7.50095	-7.61121	0.110261	VASP_299.vasp	-7.50095	-7.52371	0.0227626
VASP_189.vasp	-7.44877	-7.59267	0.143898	VASP_189.vasp	-7.44877	-7.47774	0.0289684
VASP_277.vasp	-7.44538	-7.57673	0.13135	VASP_277.vasp	-7.44538	-7.49064	0.0452588
VASP_116.vasp	-7.46093	-7.54622	0.0852945	VASP_116.vasp	-7.46093	-7.43727	0.0236594
VASP_118.vasp	-7.44488	-7.57662	0.131742	VASP_118.vasp	-7.44488	-7.49046	0.0455847
VASP_151.vasp	-7.47499	-7.50817	0.033185	VASP_151.vasp	-7.47499	-7.40033	0.0746532
VASP_11.vasp	-7.50631	-7.58831	0.0819948	VASP_11.vasp	-7.50631	-7.51369	0.0073799
VASP_97.vasp	-7.45491	-7.57412	0.119209	VASP_97.vasp	-7.45491	-7.48264	0.0277224
VASP_195.vasp	-7.49952	-7.48279	0.0167244	VASP_195.vasp	-7.49952	-7.38896	0.110559
VASP_220.vasp	-7.49952	-7.48279	0.0167241	VASP_220.vasp	-7.49952	-7.38896	0.110556
VASP_202.vasp	-7.44919	-7.5921	0.142905	VASP_202.vasp	-7.44919	-7.47809	0.0288919
VASP_17.vasp	-7.50735	-7.48545	0.0218979	VASP_17.vasp	-7.50735	-7.38319	0.124153
VASP_190.vasp	-7.45965	-7.58412	0.124462	VASP_190.vasp	-7.45965	-7.49669	0.0370327
VASP_36.vasp	-7.44489	-7.57637	0.131475	VASP_36.vasp	-7.44489	-7.49018	0.0452849
VASP_84.vasp	-7.44489	-7.57641	0.131521	VASP_84.vasp	-7.44489	-7.49021	0.0453253
VASP_89.vasp	-7.44538	-7.57676	0.131377	VASP_89.vasp	-7.44538	-7.49067	0.0452906
VASP_169.vasp	-7.50095	-7.61117	0.110218	VASP_169.vasp	-7.50095	-7.52366	0.0227085
VASP_291.vasp	-7.44919	-7.59209	0.1429	VASP_291.vasp	-7.44919	-7.47795	0.0287547
VASP_256.vasp	-7.48226	-7.49171	0.00944894	VASP_256.vasp	-7.48226	-7.41181	0.0704577
VASP_219.vasp	-7.48226	-7.49188	0.00961694	VASP_219.vasp	-7.48226	-7.41195	0.0703138
VASP_242.vasp	-7.46872	-7.54435	0.075633	VASP_242.vasp	-7.46872	-7.43223	0.03649
VASP_87.vasp	-7.44537	-7.58241	0.137038	VASP_87.vasp	-7.44537	-7.48477	0.0394026
VASP_213.vasp	-7.43917	-7.5462	0.107032	VASP_213.vasp	-7.43917	-7.4474	0.00823488
VASP_215.vasp	-7.47498	-7.50804	0.0330623	VASP_215.vasp	-7.47498	-7.40006	0.0749183
VASP_123.vasp	-7.48227	-7.49166	0.00938942	VASP_123.vasp	-7.48227	-7.41181	0.0704542
VASP_208.vasp	-7.44537	-7.58192	0.136551	VASP_208.vasp	-7.44537	-7.48438	0.0390056
VASP_141.vasp	-7.44578	-7.55794	0.112157	VASP_141.vasp	-7.44578	-7.4425	0.00327851
VASP_172.vasp	-7.49952	-7.48199	0.017525	VASP_172.vasp	-7.49952	-7.38841	0.111104
VASP_39.vasp	-7.47499	-7.50817	0.033185	VASP_39.vasp	-7.47499	-7.40033	0.0746532
VASP_113.vasp	-7.44488	-7.57596	0.131083	VASP_113.vasp	-7.44488	-7.48984	0.0449538
VASP_150.vasp	-7.455	-7.57285	0.117856	VASP_150.vasp	-7.455	-7.48153	0.0265333
VASP_144.vasp	-7.49951	-7.482	0.0175104	VASP_144.vasp	-7.49951	-7.38842	0.111092
VASP_273.vasp	-7.44489	-7.57595	0.131056	VASP_273.vasp	-7.44489	-7.48974	0.044845
VASP_49.vasp	-7.45058	-7.56254	0.111953	VASP_49.vasp	-7.45058	-7.4657	0.0151158
VASP_255.vasp	-7.49349	-7.54356	0.0500698	VASP_255.vasp	-7.49349	-7.43297	0.0605283
VASP_230.vasp	-7.47499	-7.50885	0.0338661	VASP_230.vasp	-7.47499	-7.40082	0.0741643
VASP_16.vasp	-7.50308	-7.57199	0.0689135	VASP_16.vasp	-7.50308	-7.49233	0.0107461
VASP_110.vasp	-7.50095	-7.61191	0.11096	VASP_110.vasp	-7.50095	-7.52432	0.0233675
VASP_77.vasp	-7.47499	-7.50813	0.0331436	VASP_77.vasp	-7.47499	-7.40032	0.0746738
VASP_160.vasp	-7.47497	-7.50804	0.0330661	VASP_160.vasp	-7.47497	-7.40006	0.0749135
VASP_13.vasp	-7.44537	-7.58231	0.136939	VASP_13.vasp	-7.44537	-7.4847	0.0393297
VASP_186.vasp	-7.44537	-7.58256	0.137187	VASP_186.vasp	-7.44537	-7.4849	0.0395347
VASP_241.vasp	-7.46093	-7.5462	0.0852772	VASP_241.vasp	-7.46093	-7.43724	0.0236865
VASP_8.vasp	-7.49951	-7.482	0.0175112	VASP_8.vasp	-7.49951	-7.38842	0.111092
VASP_143.vasp	-7.49951	-7.48201	0.017509	VASP_143.vasp	-7.49951	-7.38843	0.111084
VASP_24.vasp	-7.44538	-7.57665	0.131271	VASP_24.vasp	-7.44538	-7.49058	0.0451991
VASP_289.vasp	-7.49951	-7.482	0.0175188	VASP_289.vasp	-7.49951	-7.38841	0.111104
VASP_227.vasp	-7.45867	-7.58432	0.125646	VASP_227.vasp	-7.45867	-7.49609	0.0374209
VASP_168.vasp	-7.50095	-7.61098	0.110033	VASP_168.vasp	-7.50095	-7.5235	0.022554
VASP_66.vasp	-7.47853	-7.49005	0.0115227	VASP_66.vasp	-7.47853	-7.40978	0.0687431
VASP_240.vasp	-7.44919	-7.59245	0.143254	VASP_240.vasp	-7.44919	-7.47834	0.0291521
VASP_111.vasp	-7.46093	-7.5462	0.0852777	VASP_111.vasp	-7.46093	-7.43725	0.0236711
VASP_264.vasp	-7.43917	-7.54679	0.107619	VASP_264.vasp	-7.43917	-7.44798	0.00880782
VASP_288.vasp	-7.46093	-7.54584	0.0849158	VASP_288.vasp	-7.46093	-7.43694	0.0239891
VASP_104.vasp	-7.44012	-7.58487	0.144751	VASP_104.vasp	-7.44012	-7.46773	0.0276123
VASP_283.vasp	-7.47498	-7.50862	0.0336371	VASP_283.vasp	-7.47498	-7.40063	0.0743506
VASP_138.vasp	-7.47498	-7.50792	0.0329474	VASP_138.vasp	-7.47498	-7.39997	0.0750029
VASP_280.vasp	-7.49952	-7.4828	0.0167202	VASP_280.vasp	-7.49952	-7.38897	0.11055
VASP_247.vasp	-7.4454	-7.57786	0.132456	VASP_247.vasp	-7.4454	-7.47044	0.02504
VASP_105.vasp	-7.47667	-7.51136	0.0346827	VASP_105.vasp	-7.47667	-7.40195	0.0747205
VASP_270.vasp	-7.49897	-7.61339	0.114419	VASP_270.vasp	-7.49897	-7.50285	0.00388025
VASP_178.vasp	-7.48226	-7.49171	0.00944894	VASP_178.vasp	-7.48226	-7.41181	0.0704577
VASP_238.vasp	-7.46092	-7.54623	0.0853066	VASP_238.vasp	-7.46092	-7.43727	0.0236534
VASP_249.vasp	-7.4767	-7.51015	0.0334477	VASP_249.vasp	-7.4767	-7.40122	0.075482
VASP_155.vasp	-7.47499	-7.50814	0.0331537	VASP_155.vasp	-7.47499	-7.40033	0.0746584
VASP_200.vasp	-7.44488	-7.57666	0.131786	VASP_200.vasp	-7.44488	-7.49052	0.0456406
VASP_258.vasp	-7.45058	-7.56282	0.112244	VASP_258.vasp	-7.45058	-7.46597	0.0153873
VASP_287.vasp	-7.49933	-7.60009	0.100763	VASP_287.vasp	-7.49933	-7.52862	0.0292942
VASP_147.vasp	-7.44877	-7.59258	0.143809	VASP_147.vasp	-7.44877	-7.47765	0.0288729
VASP_109.vasp	-7.44877	-7.59235	0.143576	VASP_109.vasp	-7.44877	-7.47742	0.0286527
VASP_174.vasp	-7.47498	-7.50682	0.0318421	VASP_174.vasp	-7.47498	-7.39918	0.0758064
VASP_15.vasp	-7.46872	-7.54377	0.0750483	VASP_15.vasp	-7.46872	-7.43177	0.0369507
VASP_10.vasp	-7.45867	-7.58456	0.12589	VASP_10.vasp	-7.45867	-7.4963	0.0376289
VASP_96.vasp	-7.44012	-7.58483	0.144705	VASP_96.vasp	-7.44012	-7.46769	0.0275714
VASP_193.vasp	-7.47667	-7.51137	0.0346979	VASP_193.vasp	-7.47667	-7.40198	0.0746991
VASP_47.vasp	-7.49897	-7.61364	0.114669	VASP_47.vasp	-7.49897	-7.50308	0.00410517
VASP_226.vasp	-7.50081	-7.59616	0.0953497	VASP_226.vasp	-7.50081	-7.52547	0.024657
VASP_76.vasp	-7.49951	-7.48199	0.0175231	VASP_76.vasp	-7.49951	-7.38841	0.111101
VASP_135.vasp	-7.44877	-7.59269	0.143917	VASP_135.vasp	-7.44877	-7.47772	0.0289508
VASP_209.vasp	-7.47498	-7.50889	0.0339048	VASP_209.vasp	-7.47498	-7.4008	0.0741849
VASP_170.vasp	-7.50095	-7.61084	0.109891	VASP_170.vasp	-7.50095	-7.52337	0.0224195
VASP_159.vasp	-7.44537	-7.58226	0.136892	VASP_159.vasp	-7.44537	-7.48466	0.0392881
VASP_292.vasp	-7.45058	-7.56224	0.111655	VASP_292.vasp	-7.45058	-7.46551	0.0149229
VASP_92.vasp	-7.46872	-7.54358	0.0748639	VASP_92.vasp	-7.46872	-7.43163	0.037093
VASP_156.vasp	-7.45867	-7.58461	0.125942	VASP_156.vasp	-7.45867	-7.49639	0.0377211
VASP_281.vasp	-7.47498	-7.50802	0.0330444	VASP_281.vasp	-7.47498	-7.40004	0.0749388
VASP_298.vasp	-7.44878	-7.5923	0.143519	VASP_298.vasp	-7.44878	-7.47736	0.0285859
VASP_233.vasp	-7.46872	-7.54372	0.075002	VASP_233.vasp	-7.46872	-7.43174	0.0369802
VASP_72.vasp	-7.44537	-7.58278	0.13741	VASP_72.vasp	-7.44537	-7.4851	0.0397257
VASP_88.vasp	-7.45059	-7.56209	0.111504	VASP_88.vasp	-7.45059	-7.46533	0.0147436
VASP_131.vasp	-7.455	-7.57162	0.116615	VASP_131.vasp	-7.455	-7.48024	0.025236
VASP_222.vasp	-7.47668	-7.51135	0.0346702	VASP_222.vasp	-7.47668	-7.40195	0.0747257
VASP_266.vasp	-7.50095	-7.61104	0.110093	VASP_266.vasp	-7.50095	-7.52356	0.0226055
VASP_285.vasp	-7.47498	-7.5089	0.0339195	VASP_285.vasp	-7.47498	-7.40084	0.0741471
VASP_206.vasp	-7.46093	-7.54584	0.0849172	VASP_206.vasp	-7.46093	-7.43694	0.023983
VASP_207.vasp	-7.4732	-7.52881	0.055604	VASP_207.vasp	-7.4732	-7.38712	0.0860882
VASP_296.vasp	-7.46093	-7.54622	0.0852945	VASP_296.vasp	-7.46093	-7.43728	0.0236493
VASP_6.vasp	-7.45867	-7.58429	0.12562	VASP_6.vasp	-7.45867	-7.49602	0.0373502
VASP_269.vasp	-7.44877	-7.5925	0.143728	VASP_269.vasp	-7.44877	-7.47757	0.028795
VASP_218.vasp	-7.45058	-7.5619	0.111315	VASP_218.vasp	-7.45058	-7.46513	0.0145496
VASP_3.vasp	-7.44538	-7.57669	0.131312	VASP_3.vasp	-7.44538	-7.49061	0.0452352
VASP_2.vasp	-7.47667	-7.51135	0.0346782	VASP_2.vasp	-7.47667	-7.40195	0.0747236
VASP_9.vasp	-7.49897	-7.51289	0.0139148	VASP_9.vasp	-7.49897	-7.40721	0.0917663
VASP_133.vasp	-7.44538	-7.57677	0.131386	VASP_133.vasp	-7.44538	-7.49067	0.0452887
VASP_94.vasp	-7.44487	-7.57648	0.131606	VASP_94.vasp	-7.44487	-7.49034	0.0454682
VASP_205.vasp	-7.48227	-7.49185	0.00957784	VASP_205.vasp	-7.48227	-7.41193	0.0703411
VASP_224.vasp	-7.45058	-7.56228	0.111701	VASP_224.vasp	-7.45058	-7.46555	0.0149633
VASP_188.vasp	-7.4732	-7.5263	0.0531017	VASP_188.vasp	-7.4732	-7.38493	0.0882715
VASP_243.vasp	-7.50309	-7.57186	0.0687696	VASP_243.vasp	-7.50309	-7.49241	0.0106753
VASP_108.vasp	-7.47498	-7.50847	0.0334828	VASP_108.vasp	-7.47498	-7.40047	0.0745137
VASP_152.vasp	-7.50095	-7.61106	0.110113	VASP_152.vasp	-7.50095	-7.52356	0.0226088
VASP_59.vasp	-7.47668	-7.51138	0.0347016	VASP_59.vasp	-7.47668	-7.40198	0.0746985
VASP_177.vasp	-7.47496	-7.50815	0.0331939	VASP_177.vasp	-7.47496	-7.39977	0.0751819
VASP_117.vasp	-7.47499	-7.50814	0.0331575	VASP_117.vasp	-7.47499	-7.40032	0.0746664
VASP_65.vasp	-7.45058	-7.56248	0.111897	VASP_65.vasp	-7.45058	-7.46579	0.0152024
VASP_132.vasp	-7.50252	-7.57476	0.0722328	VASP_132.vasp	-7.50252	-7.49499	0.00752882
VASP_166.vasp	-7.46093	-7.54561	0.0846793	VASP_166.vasp	-7.46093	-7.43675	0.0241756
VASP_43.vasp	-7.47853	-7.4903	0.0117719	VASP_43.vasp	-7.47853	-7.40992	0.068609
VASP_38.vasp	-7.44218	-7.60161	0.159436	VASP_38.vasp	-7.44218	-7.45129	0.00911503
VASP_282.vasp	-7.46093	-7.54567	0.0847411	VASP_282.vasp	-7.46093	-7.43672	0.0242108
VASP_95.vasp	-7.45965	-7.58406	0.124409	VASP_95.vasp	-7.45965	-7.49666	0.0370079
VASP_244.vasp	-7.44013	-7.58481	0.144681	VASP_244.vasp	-7.44013	-7.4677	0.027574
VASP_278.vasp	-7.50095	-7.61099	0.110045	VASP_278.vasp	-7.50095	-7.52351	0.0225648
VASP_102.vasp	-7.44013	-7.5842	0.14407	VASP_102.vasp	-7.44013	-7.46724	0.0271066
VASP_112.vasp	-7.45867	-7.58437	0.1257	VASP_112.vasp	-7.45867	-7.49611	0.0374407
VASP_37.vasp	-7.46093	-7.54622	0.0852964	VASP_37.vasp	-7.46093	-7.43726	0.0236636
VASP_187.vasp	-7.51174	-7.52698	0.0152449	VASP_187.vasp	-7.51174	-7.44161	0.0701231
VASP_173.vasp	-7.45965	-7.58414	0.124494	VASP_173.vasp	-7.45965	-7.49671	0.0370675
VASP_235.vasp	-7.47498	-7.50792	0.0329474	VASP_235.vasp	-7.47498	-7.39997	0.0750029
VASP_214.vasp	-7.47668	-7.51136	0.0346854	VASP_214.vasp	-7.47668	-7.40198	0.0746996
VASP_20.vasp	-7.50095	-7.61136	0.110409	VASP_20.vasp	-7.50095	-7.52383	0.0228765
VASP_149.vasp	-7.49952	-7.4828	0.016723	VASP_149.vasp	-7.49952	-7.38896	0.110556

## Sheet: Swaps-FeNi
structure	DFT Total energy/atom	DIEP Total energy/atom	DIEP Abs(error)	structure	DFT Total energy/atom	M3GNET Total energy/atom	M3GNET Abs(error)
VASP_137.vasp	-6.50222	-6.92264	0.420417	VASP_137.vasp	-6.50222	-6.88354	0.381319
VASP_197.vasp	-6.50222	-6.92245	0.420228	VASP_197.vasp	-6.50222	-6.88327	0.381054
VASP_55.vasp	-6.50222	-6.92218	0.419964	VASP_55.vasp	-6.50222	-6.88291	0.380693
VASP_56.vasp	-6.50222	-6.92253	0.420309	VASP_56.vasp	-6.50222	-6.88338	0.381159
VASP_85.vasp	-6.74157	-6.90512	0.163547	VASP_85.vasp	-6.74157	-6.85911	0.117542
VASP_114.vasp	-6.50222	-6.9225	0.420282	VASP_114.vasp	-6.50222	-6.88333	0.381112
VASP_181.vasp	-6.60002	-6.91325	0.313232	VASP_181.vasp	-6.60002	-6.88129	0.281267
VASP_217.vasp	-6.84758	-6.91365	0.0660703	VASP_217.vasp	-6.84758	-6.85024	0.00266053
VASP_60.vasp	-6.74157	-6.9056	0.164032	VASP_60.vasp	-6.74157	-6.85957	0.118009
VASP_119.vasp	-6.50603	-6.92245	0.416414	VASP_119.vasp	-6.50603	-6.87815	0.372118
VASP_284.vasp	-6.84757	-6.91398	0.0664091	VASP_284.vasp	-6.84757	-6.85078	0.00321079
VASP_183.vasp	-6.84758	-6.91364	0.0660631	VASP_183.vasp	-6.84758	-6.85017	0.00258934
VASP_14.vasp	-6.50222	-6.9228	0.420578	VASP_14.vasp	-6.50222	-6.88375	0.381534
VASP_257.vasp	-6.74157	-6.90545	0.163882	VASP_257.vasp	-6.74157	-6.85936	0.11779
VASP_295.vasp	-6.84758	-6.91425	0.0666725	VASP_295.vasp	-6.84758	-6.84987	0.00229239
VASP_115.vasp	-6.50222	-6.92242	0.420205	VASP_115.vasp	-6.50222	-6.88325	0.38103
VASP_250.vasp	-6.74157	-6.90548	0.163909	VASP_250.vasp	-6.74157	-6.85945	0.117878
VASP_42.vasp	-6.50222	-6.92229	0.420069	VASP_42.vasp	-6.50222	-6.88305	0.380837
VASP_82.vasp	-6.74157	-6.90512	0.163556	VASP_82.vasp	-6.74157	-6.85913	0.117565
VASP_175.vasp	-6.50603	-6.92197	0.415941	VASP_175.vasp	-6.50603	-6.87751	0.371482
VASP_184.vasp	-6.50222	-6.92264	0.420418	VASP_184.vasp	-6.50222	-6.88355	0.381329
VASP_86.vasp	-6.55618	-6.83478	0.278605	VASP_86.vasp	-6.55618	-6.85211	0.295933
VASP_185.vasp	-6.50222	-6.92283	0.420615	VASP_185.vasp	-6.50222	-6.88382	0.381603
VASP_5.vasp	-6.50222	-6.9225	0.42028	VASP_5.vasp	-6.50222	-6.88336	0.381138
VASP_182.vasp	-6.50222	-6.92259	0.420367	VASP_182.vasp	-6.50222	-6.88347	0.381251
VASP_164.vasp	-6.50222	-6.92249	0.420266	VASP_164.vasp	-6.50222	-6.88334	0.381118
VASP_73.vasp	-6.74156	-6.90679	0.165223	VASP_73.vasp	-6.74156	-6.86062	0.119051
VASP_99.vasp	-6.50223	-6.92251	0.420283	VASP_99.vasp	-6.50223	-6.88335	0.381125
VASP_290.vasp	-6.74156	-6.90685	0.165289	VASP_290.vasp	-6.74156	-6.86071	0.11915
VASP_71.vasp	-6.50222	-6.92241	0.420195	VASP_71.vasp	-6.50222	-6.88322	0.381004
VASP_245.vasp	-6.50222	-6.92241	0.42019	VASP_245.vasp	-6.50222	-6.88322	0.381002
VASP_28.vasp	-6.84757	-6.9132	0.0656257	VASP_28.vasp	-6.84757	-6.84829	0.000714356
VASP_276.vasp	-6.49321	-6.90624	0.413034	VASP_276.vasp	-6.49321	-6.87868	0.385476
VASP_251.vasp	-6.50222	-6.92238	0.420165	VASP_251.vasp	-6.50222	-6.88319	0.380974
VASP_165.vasp	-6.50222	-6.92251	0.420289	VASP_165.vasp	-6.50222	-6.88337	0.381148
VASP_201.vasp	-6.50222	-6.92285	0.420636	VASP_201.vasp	-6.50222	-6.88385	0.381629
VASP_1.vasp	-6.50222	-6.92255	0.42033	VASP_1.vasp	-6.50222	-6.88342	0.381196
VASP_75.vasp	-6.50222	-6.92234	0.420118	VASP_75.vasp	-6.50222	-6.88312	0.380901
VASP_68.vasp	-6.50222	-6.92259	0.42037	VASP_68.vasp	-6.50222	-6.88346	0.381235
VASP_236.vasp	-6.50222	-6.92249	0.420264	VASP_236.vasp	-6.50222	-6.88333	0.381111
VASP_53.vasp	-6.50222	-6.92253	0.420305	VASP_53.vasp	-6.50222	-6.88339	0.381172
VASP_125.vasp	-6.50222	-6.9227	0.420478	VASP_125.vasp	-6.50222	-6.88362	0.381398
VASP_274.vasp	-6.50222	-6.92252	0.420304	VASP_274.vasp	-6.50222	-6.88337	0.381151
VASP_129.vasp	-6.61038	-6.8809	0.270524	VASP_129.vasp	-6.61038	-6.85606	0.245683
VASP_100.vasp	-6.50222	-6.92272	0.420497	VASP_100.vasp	-6.50222	-6.88367	0.381446
VASP_158.vasp	-6.81314	-6.83794	0.0247986	VASP_158.vasp	-6.81314	-6.80527	0.00786958
VASP_41.vasp	-6.50222	-6.92252	0.420295	VASP_41.vasp	-6.50222	-6.88338	0.381164
VASP_46.vasp	-6.74156	-6.90518	0.163624	VASP_46.vasp	-6.74156	-6.85928	0.117716
VASP_26.vasp	-6.84758	-6.91348	0.0658979	VASP_26.vasp	-6.84758	-6.84959	0.00201449
VASP_27.vasp	-6.50221	-6.92306	0.420848	VASP_27.vasp	-6.50221	-6.88414	0.381924
VASP_272.vasp	-6.73081	-6.92118	0.19037	VASP_272.vasp	-6.73081	-6.88004	0.149224
VASP_196.vasp	-6.50222	-6.92254	0.420322	VASP_196.vasp	-6.50222	-6.88342	0.3812
VASP_51.vasp	-6.50222	-6.92246	0.420244	VASP_51.vasp	-6.50222	-6.88329	0.381073
VASP_93.vasp	-6.50222	-6.92216	0.419947	VASP_93.vasp	-6.50222	-6.88287	0.380657
VASP_293.vasp	-6.50603	-6.92191	0.415883	VASP_293.vasp	-6.50603	-6.8774	0.371378
VASP_198.vasp	-6.74157	-6.90539	0.163821	VASP_198.vasp	-6.74157	-6.85929	0.117724
VASP_122.vasp	-6.50222	-6.92261	0.420391	VASP_122.vasp	-6.50222	-6.8835	0.381283
VASP_297.vasp	-6.55618	-6.83473	0.278547	VASP_297.vasp	-6.55618	-6.8521	0.295917
VASP_31.vasp	-6.74157	-6.90607	0.164497	VASP_31.vasp	-6.74157	-6.85967	0.118099
VASP_229.vasp	-6.84758	-6.91364	0.0660566	VASP_229.vasp	-6.84758	-6.84953	0.00195313
VASP_191.vasp	-6.50222	-6.92256	0.420334	VASP_191.vasp	-6.50222	-6.88342	0.381194
VASP_223.vasp	-6.57492	-6.99969	0.424778	VASP_223.vasp	-6.57492	-6.93965	0.364736
VASP_194.vasp	-6.50222	-6.92255	0.420326	VASP_194.vasp	-6.50222	-6.88342	0.381195
VASP_277.vasp	-6.50222	-6.92253	0.420305	VASP_277.vasp	-6.50222	-6.88339	0.381173
VASP_116.vasp	-6.61039	-6.88121	0.270828	VASP_116.vasp	-6.61039	-6.85639	0.246003
VASP_162.vasp	-6.50222	-6.9225	0.420282	VASP_162.vasp	-6.50222	-6.88333	0.381111
VASP_151.vasp	-6.50222	-6.92275	0.420532	VASP_151.vasp	-6.50222	-6.8837	0.38148
VASP_97.vasp	-6.50222	-6.92287	0.420657	VASP_97.vasp	-6.50222	-6.88389	0.381669
VASP_195.vasp	-6.50222	-6.92261	0.420391	VASP_195.vasp	-6.50222	-6.88351	0.381292
VASP_17.vasp	-6.50604	-6.92199	0.415951	VASP_17.vasp	-6.50604	-6.87749	0.371454
VASP_84.vasp	-6.49321	-6.90614	0.412933	VASP_84.vasp	-6.49321	-6.87861	0.385404
VASP_169.vasp	-6.74156	-6.90697	0.165411	VASP_169.vasp	-6.74156	-6.86105	0.119491
VASP_256.vasp	-6.50222	-6.9225	0.420278	VASP_256.vasp	-6.50222	-6.88334	0.381116
VASP_219.vasp	-6.50222	-6.92252	0.420298	VASP_219.vasp	-6.50222	-6.88336	0.381144
VASP_213.vasp	-6.50222	-6.92246	0.420235	VASP_213.vasp	-6.50222	-6.88328	0.381055
VASP_123.vasp	-6.50222	-6.92249	0.420274	VASP_123.vasp	-6.50222	-6.88333	0.381113
VASP_208.vasp	-6.50222	-6.92237	0.420148	VASP_208.vasp	-6.50222	-6.88316	0.380941
VASP_144.vasp	-6.50222	-6.92249	0.420272	VASP_144.vasp	-6.50222	-6.88334	0.381116
VASP_273.vasp	-6.74157	-6.90532	0.163756	VASP_273.vasp	-6.74157	-6.85934	0.117775
VASP_230.vasp	-6.50222	-6.92251	0.420288	VASP_230.vasp	-6.50222	-6.88335	0.38113
VASP_77.vasp	-6.68023	-6.94715	0.266918	VASP_77.vasp	-6.68023	-6.87959	0.199358
VASP_241.vasp	-6.60002	-6.91462	0.314602	VASP_241.vasp	-6.60002	-6.88241	0.282386
VASP_227.vasp	-6.50222	-6.92245	0.420229	VASP_227.vasp	-6.50222	-6.88327	0.381055
VASP_168.vasp	-6.73349	-6.92634	0.192844	VASP_168.vasp	-6.73349	-6.85817	0.124673
VASP_286.vasp	-6.50222	-6.92253	0.420309	VASP_286.vasp	-6.50222	-6.88338	0.381159
VASP_264.vasp	-6.50222	-6.92273	0.420514	VASP_264.vasp	-6.50222	-6.88368	0.381462
VASP_288.vasp	-6.61828	-6.80983	0.191557	VASP_288.vasp	-6.61828	-6.8311	0.212828
VASP_104.vasp	-6.63567	-6.9585	0.322825	VASP_104.vasp	-6.63567	-6.90319	0.267515
VASP_161.vasp	-6.74157	-6.90656	0.164996	VASP_161.vasp	-6.74157	-6.86014	0.118576
VASP_280.vasp	-6.49322	-6.90633	0.41311	VASP_280.vasp	-6.49322	-6.87872	0.385502
VASP_247.vasp	-6.50222	-6.92238	0.420157	VASP_247.vasp	-6.50222	-6.88318	0.380965
VASP_238.vasp	-6.69996	-6.92009	0.220132	VASP_238.vasp	-6.69996	-6.87367	0.173709
VASP_157.vasp	-6.74157	-6.90479	0.163222	VASP_157.vasp	-6.74157	-6.85832	0.116756
VASP_109.vasp	-6.61712	-6.97385	0.356732	VASP_109.vasp	-6.61712	-6.91706	0.299939
VASP_174.vasp	-6.84758	-6.91355	0.0659712	VASP_174.vasp	-6.84758	-6.84992	0.00234615
VASP_10.vasp	-6.50222	-6.92259	0.420374	VASP_10.vasp	-6.50222	-6.88348	0.381256
VASP_76.vasp	-6.73081	-6.9208	0.18999	VASP_76.vasp	-6.73081	-6.87978	0.148975
VASP_135.vasp	-6.74157	-6.90553	0.163965	VASP_135.vasp	-6.74157	-6.8595	0.117927
VASP_209.vasp	-6.50222	-6.92271	0.420488	VASP_209.vasp	-6.50222	-6.88365	0.381429
VASP_170.vasp	-6.73167	-6.92946	0.197797	VASP_170.vasp	-6.73167	-6.868	0.136336
VASP_159.vasp	-6.74157	-6.90545	0.163885	VASP_159.vasp	-6.74157	-6.85939	0.117817
VASP_156.vasp	-6.50222	-6.92253	0.420307	VASP_156.vasp	-6.50222	-6.88339	0.381165
VASP_281.vasp	-6.81314	-6.83776	0.0246268	VASP_281.vasp	-6.81314	-6.80506	0.00807986
VASP_101.vasp	-6.81315	-6.83795	0.0248027	VASP_101.vasp	-6.81315	-6.80532	0.00782698
VASP_81.vasp	-6.50222	-6.92259	0.420367	VASP_81.vasp	-6.50222	-6.88348	0.381261
VASP_206.vasp	-6.50222	-6.92254	0.420318	VASP_206.vasp	-6.50222	-6.88342	0.381196
VASP_207.vasp	-6.84758	-6.91431	0.0667236	VASP_207.vasp	-6.84758	-6.85038	0.00279969
VASP_126.vasp	-6.50222	-6.92256	0.420342	VASP_126.vasp	-6.50222	-6.88343	0.381213
VASP_6.vasp	-6.50222	-6.92247	0.420254	VASP_6.vasp	-6.50222	-6.88331	0.38109
VASP_176.vasp	-6.50222	-6.92266	0.420444	VASP_176.vasp	-6.50222	-6.88358	0.381359
VASP_2.vasp	-6.50222	-6.92254	0.420323	VASP_2.vasp	-6.50222	-6.88342	0.381199
VASP_133.vasp	-6.50603	-6.92254	0.416511	VASP_133.vasp	-6.50603	-6.87818	0.372151
VASP_228.vasp	-6.50222	-6.92256	0.420344	VASP_228.vasp	-6.50222	-6.88344	0.381217
VASP_205.vasp	-6.50222	-6.9225	0.420283	VASP_205.vasp	-6.50222	-6.88335	0.381128
VASP_243.vasp	-6.5022	-6.92179	0.419591	VASP_243.vasp	-6.5022	-6.88234	0.380139
VASP_59.vasp	-6.50221	-6.92218	0.419965	VASP_59.vasp	-6.50221	-6.88291	0.380692
VASP_177.vasp	-6.50222	-6.92261	0.420392	VASP_177.vasp	-6.50222	-6.88351	0.381294
VASP_117.vasp	-6.50222	-6.92244	0.42022	VASP_117.vasp	-6.50222	-6.88326	0.381036
VASP_65.vasp	-6.50222	-6.92246	0.420238	VASP_65.vasp	-6.50222	-6.8833	0.381085
VASP_132.vasp	-6.50222	-6.92247	0.420252	VASP_132.vasp	-6.50222	-6.88332	0.381098
VASP_282.vasp	-6.50222	-6.92244	0.420216	VASP_282.vasp	-6.50222	-6.88325	0.381029
VASP_95.vasp	-6.50222	-6.92252	0.420297	VASP_95.vasp	-6.50222	-6.88337	0.38115
VASP_278.vasp	-6.84758	-6.91348	0.0658979	VASP_278.vasp	-6.84758	-6.84965	0.00206582

## Sheet: Swaps-PtIr
structure	DFT Total energy/atom	DIEP Total energy/atom	DIEP Abs(error)	structure	DFT Total energy/atom	M3GNET Total energy/atom	M3GNET Abs(error)
VASP_52.vasp	-7.39742	-7.44157	0.0441529	VASP_52.vasp	-7.39742	-7.38152	0.0158956
VASP_221.vasp	-7.38249	-7.42322	0.0407371	VASP_221.vasp	-7.38249	-7.43133	0.0488391
VASP_137.vasp	-7.3913	-7.43972	0.048421	VASP_137.vasp	-7.3913	-7.37733	0.0139704
VASP_197.vasp	-7.37603	-7.40441	0.0283793	VASP_197.vasp	-7.37603	-7.4768	0.100774
VASP_232.vasp	-7.38249	-7.42322	0.0407371	VASP_232.vasp	-7.38249	-7.43133	0.0488391
VASP_262.vasp	-7.38249	-7.42327	0.0407882	VASP_262.vasp	-7.38249	-7.43137	0.0488848
VASP_69.vasp	-7.38249	-7.42327	0.0407802	VASP_69.vasp	-7.38249	-7.43136	0.0488745
VASP_134.vasp	-7.38249	-7.42324	0.0407576	VASP_134.vasp	-7.38249	-7.43135	0.0488598
VASP_0.vasp	-7.37603	-7.4044	0.0283748	VASP_0.vasp	-7.37603	-7.47681	0.100782
VASP_216.vasp	-7.39741	-7.44154	0.0441304	VASP_216.vasp	-7.39741	-7.3815	0.0159178
VASP_55.vasp	-7.38249	-7.42328	0.0407903	VASP_55.vasp	-7.38249	-7.43137	0.0488863
VASP_56.vasp	-7.39742	-7.44156	0.0441456	VASP_56.vasp	-7.39742	-7.38151	0.0159018
VASP_61.vasp	-7.38249	-7.42331	0.0408206	VASP_61.vasp	-7.38249	-7.4314	0.048911
VASP_114.vasp	-7.38249	-7.42327	0.0407838	VASP_114.vasp	-7.38249	-7.43137	0.0488793
VASP_210.vasp	-7.38249	-7.42328	0.0407903	VASP_210.vasp	-7.38249	-7.43137	0.0488849
VASP_271.vasp	-7.38249	-7.42329	0.0407993	VASP_271.vasp	-7.38249	-7.43138	0.0488933
VASP_259.vasp	-7.38249	-7.42327	0.0407803	VASP_259.vasp	-7.38249	-7.43136	0.0488778
VASP_181.vasp	-7.38249	-7.42323	0.0407414	VASP_181.vasp	-7.38249	-7.43133	0.0488425
VASP_67.vasp	-7.38249	-7.42324	0.0407562	VASP_67.vasp	-7.38249	-7.43134	0.0488559
VASP_217.vasp	-7.38249	-7.42331	0.0408195	VASP_217.vasp	-7.38249	-7.43139	0.0489079
VASP_60.vasp	-7.39742	-7.44154	0.0441203	VASP_60.vasp	-7.39742	-7.38149	0.0159257
VASP_119.vasp	-7.39741	-7.44154	0.0441304	VASP_119.vasp	-7.39741	-7.3815	0.0159178
VASP_284.vasp	-7.38249	-7.42326	0.0407718	VASP_284.vasp	-7.38249	-7.43136	0.0488698
VASP_183.vasp	-7.38249	-7.42331	0.0408195	VASP_183.vasp	-7.38249	-7.43139	0.0489079
VASP_103.vasp	-7.39742	-7.44155	0.044134	VASP_103.vasp	-7.39742	-7.3815	0.0159167
VASP_14.vasp	-7.38249	-7.42331	0.040823	VASP_14.vasp	-7.38249	-7.4314	0.0489126
VASP_148.vasp	-7.38249	-7.42329	0.0407998	VASP_148.vasp	-7.38249	-7.43138	0.0488928
VASP_257.vasp	-7.38249	-7.42324	0.0407579	VASP_257.vasp	-7.38249	-7.43134	0.048857
VASP_294.vasp	-7.3913	-7.43972	0.0484244	VASP_294.vasp	-7.3913	-7.37733	0.0139668
VASP_295.vasp	-7.37603	-7.40439	0.0283658	VASP_295.vasp	-7.37603	-7.47679	0.100763
VASP_115.vasp	-7.37603	-7.4044	0.0283697	VASP_115.vasp	-7.37603	-7.47681	0.100781
VASP_136.vasp	-7.3913	-7.43972	0.0484205	VASP_136.vasp	-7.3913	-7.37733	0.0139684
VASP_250.vasp	-7.39741	-7.44154	0.0441304	VASP_250.vasp	-7.39741	-7.3815	0.0159178
VASP_42.vasp	-7.38249	-7.42329	0.0407998	VASP_42.vasp	-7.38249	-7.43138	0.0488928
VASP_62.vasp	-7.38249	-7.42325	0.0407602	VASP_62.vasp	-7.38249	-7.43135	0.0488622
VASP_252.vasp	-7.39742	-7.44157	0.0441529	VASP_252.vasp	-7.39742	-7.38152	0.0158956
VASP_106.vasp	-7.38249	-7.4233	0.0408178	VASP_106.vasp	-7.38249	-7.4314	0.0489091
VASP_154.vasp	-7.38249	-7.42327	0.0407826	VASP_154.vasp	-7.38249	-7.43137	0.0488803
VASP_50.vasp	-7.39741	-7.44154	0.0441304	VASP_50.vasp	-7.39741	-7.3815	0.0159178
VASP_175.vasp	-7.38249	-7.42326	0.0407787	VASP_175.vasp	-7.38249	-7.43136	0.0488767
VASP_184.vasp	-7.38249	-7.42327	0.0407857	VASP_184.vasp	-7.38249	-7.43137	0.0488814
VASP_139.vasp	-7.39741	-7.44154	0.0441304	VASP_139.vasp	-7.39741	-7.3815	0.0159178
VASP_33.vasp	-7.39742	-7.44157	0.0441529	VASP_33.vasp	-7.39742	-7.38152	0.0158956
VASP_64.vasp	-7.38249	-7.42325	0.0407688	VASP_64.vasp	-7.38249	-7.43135	0.0488668
VASP_63.vasp	-7.38249	-7.42325	0.0407605	VASP_63.vasp	-7.38249	-7.43135	0.0488622
VASP_185.vasp	-7.38249	-7.42327	0.0407826	VASP_185.vasp	-7.38249	-7.43137	0.0488803
VASP_25.vasp	-7.3913	-7.43973	0.0484317	VASP_25.vasp	-7.3913	-7.37734	0.0139581
VASP_5.vasp	-7.38249	-7.42327	0.0407885	VASP_5.vasp	-7.38249	-7.43137	0.0488837
VASP_124.vasp	-7.39742	-7.44155	0.044134	VASP_124.vasp	-7.39742	-7.3815	0.0159167
VASP_182.vasp	-7.3913	-7.43972	0.0484233	VASP_182.vasp	-7.3913	-7.37733	0.0139659
VASP_145.vasp	-7.38249	-7.4233	0.0408144	VASP_145.vasp	-7.38249	-7.43139	0.0489046
VASP_164.vasp	-7.38249	-7.42327	0.0407863	VASP_164.vasp	-7.38249	-7.43137	0.0488821
VASP_19.vasp	-7.38249	-7.42328	0.0407903	VASP_19.vasp	-7.38249	-7.43137	0.0488863
VASP_253.vasp	-7.38249	-7.42323	0.0407391	VASP_253.vasp	-7.38249	-7.43133	0.0488444
VASP_57.vasp	-7.38249	-7.42327	0.0407877	VASP_57.vasp	-7.38249	-7.43137	0.0488846
VASP_279.vasp	-7.38249	-7.4233	0.0408178	VASP_279.vasp	-7.38249	-7.43139	0.0489074
VASP_146.vasp	-7.39742	-7.44157	0.0441529	VASP_146.vasp	-7.39742	-7.38152	0.0158956
VASP_267.vasp	-7.37603	-7.4044	0.0283751	VASP_267.vasp	-7.37603	-7.47681	0.100783
VASP_203.vasp	-7.39742	-7.44157	0.0441529	VASP_203.vasp	-7.39742	-7.38152	0.0158956
VASP_127.vasp	-7.38249	-7.42329	0.0407993	VASP_127.vasp	-7.38249	-7.43138	0.0488933
VASP_225.vasp	-7.38249	-7.42327	0.0407826	VASP_225.vasp	-7.38249	-7.43137	0.0488803
VASP_275.vasp	-7.38249	-7.42325	0.0407591	VASP_275.vasp	-7.38249	-7.43135	0.0488588
VASP_246.vasp	-7.38249	-7.42325	0.0407591	VASP_246.vasp	-7.38249	-7.43135	0.0488588
VASP_153.vasp	-7.39742	-7.44154	0.0441203	VASP_153.vasp	-7.39742	-7.38149	0.0159257
VASP_290.vasp	-7.3913	-7.43973	0.048425	VASP_290.vasp	-7.3913	-7.37734	0.0139642
VASP_245.vasp	-7.38249	-7.42329	0.0407993	VASP_245.vasp	-7.38249	-7.43138	0.0488933
VASP_18.vasp	-7.38249	-7.42331	0.0408206	VASP_18.vasp	-7.38249	-7.4314	0.048911
VASP_237.vasp	-7.39742	-7.44155	0.0441321	VASP_237.vasp	-7.39742	-7.3815	0.0159139
VASP_28.vasp	-7.38249	-7.42325	0.0407685	VASP_28.vasp	-7.38249	-7.43135	0.0488668
VASP_30.vasp	-7.38249	-7.42327	0.0407819	VASP_30.vasp	-7.38249	-7.43136	0.0488765
VASP_276.vasp	-7.3913	-7.43972	0.0484244	VASP_276.vasp	-7.3913	-7.37733	0.0139668
VASP_251.vasp	-7.38249	-7.42321	0.0407256	VASP_251.vasp	-7.38249	-7.43132	0.0488292
VASP_263.vasp	-7.38249	-7.42327	0.0407877	VASP_263.vasp	-7.38249	-7.43137	0.0488846
VASP_22.vasp	-7.38249	-7.42322	0.0407371	VASP_22.vasp	-7.38249	-7.43133	0.0488391
VASP_12.vasp	-7.38249	-7.4233	0.0408181	VASP_12.vasp	-7.38249	-7.4314	0.0489088
VASP_248.vasp	-7.3913	-7.43973	0.0484317	VASP_248.vasp	-7.3913	-7.37734	0.0139581
VASP_231.vasp	-7.38249	-7.4233	0.0408123	VASP_231.vasp	-7.38249	-7.43139	0.0489022
VASP_165.vasp	-7.38249	-7.42324	0.040759	VASP_165.vasp	-7.38249	-7.43134	0.0488576
VASP_201.vasp	-7.38249	-7.42324	0.040759	VASP_201.vasp	-7.38249	-7.43134	0.0488576
VASP_212.vasp	-7.38249	-7.42324	0.0407562	VASP_212.vasp	-7.38249	-7.43134	0.0488553
VASP_1.vasp	-7.38249	-7.42324	0.0407535	VASP_1.vasp	-7.38249	-7.43134	0.0488563
VASP_68.vasp	-7.3913	-7.43973	0.0484255	VASP_68.vasp	-7.3913	-7.37733	0.0139665
VASP_236.vasp	-7.37603	-7.40441	0.0283793	VASP_236.vasp	-7.37603	-7.4768	0.100774
VASP_34.vasp	-7.38249	-7.42323	0.0407422	VASP_34.vasp	-7.38249	-7.43133	0.0488447
VASP_268.vasp	-7.38249	-7.42329	0.0407998	VASP_268.vasp	-7.38249	-7.43138	0.0488928
VASP_53.vasp	-7.38249	-7.42327	0.0407819	VASP_53.vasp	-7.38249	-7.43136	0.0488765
VASP_125.vasp	-7.38249	-7.42328	0.0407942	VASP_125.vasp	-7.38249	-7.43138	0.0488883
VASP_274.vasp	-7.38249	-7.42326	0.0407786	VASP_274.vasp	-7.38249	-7.43136	0.0488767
VASP_35.vasp	-7.38249	-7.42327	0.0407819	VASP_35.vasp	-7.38249	-7.43136	0.0488765
VASP_129.vasp	-7.38249	-7.42327	0.0407863	VASP_129.vasp	-7.38249	-7.43137	0.0488821
VASP_261.vasp	-7.38249	-7.42331	0.0408195	VASP_261.vasp	-7.38249	-7.43139	0.0489079
VASP_100.vasp	-7.38249	-7.42322	0.0407371	VASP_100.vasp	-7.38249	-7.43133	0.0488391
VASP_234.vasp	-7.38249	-7.42328	0.0407903	VASP_234.vasp	-7.38249	-7.43137	0.0488863
VASP_158.vasp	-7.39741	-7.44154	0.0441299	VASP_158.vasp	-7.39741	-7.3815	0.015915
VASP_128.vasp	-7.38249	-7.42327	0.0407882	VASP_128.vasp	-7.38249	-7.43137	0.0488848
VASP_41.vasp	-7.39741	-7.44154	0.0441299	VASP_41.vasp	-7.39741	-7.3815	0.015915
VASP_4.vasp	-7.3913	-7.43972	0.048421	VASP_4.vasp	-7.3913	-7.37733	0.0139704
VASP_171.vasp	-7.38249	-7.42327	0.0407863	VASP_171.vasp	-7.38249	-7.43137	0.0488821
VASP_58.vasp	-7.37603	-7.4044	0.0283759	VASP_58.vasp	-7.37603	-7.47681	0.100783
VASP_46.vasp	-7.38249	-7.4233	0.0408178	VASP_46.vasp	-7.38249	-7.4314	0.0489088
VASP_121.vasp	-7.3913	-7.43972	0.0484233	VASP_121.vasp	-7.3913	-7.37733	0.0139659
VASP_23.vasp	-7.38249	-7.42325	0.0407688	VASP_23.vasp	-7.38249	-7.43135	0.0488668
VASP_26.vasp	-7.39742	-7.44155	0.044134	VASP_26.vasp	-7.39742	-7.3815	0.0159167
VASP_239.vasp	-7.39742	-7.44156	0.0441456	VASP_239.vasp	-7.39742	-7.38151	0.0159018
VASP_260.vasp	-7.38249	-7.4233	0.0408144	VASP_260.vasp	-7.38249	-7.43139	0.0489046
VASP_27.vasp	-7.38249	-7.42322	0.0407355	VASP_27.vasp	-7.38249	-7.43132	0.0488374
VASP_272.vasp	-7.3913	-7.43973	0.0484261	VASP_272.vasp	-7.3913	-7.37734	0.0139628
VASP_196.vasp	-7.38249	-7.42331	0.0408206	VASP_196.vasp	-7.38249	-7.4314	0.048911
VASP_51.vasp	-7.38249	-7.42326	0.0407718	VASP_51.vasp	-7.38249	-7.43136	0.0488698
VASP_163.vasp	-7.38249	-7.42327	0.0407826	VASP_163.vasp	-7.38249	-7.43137	0.0488803
VASP_48.vasp	-7.38249	-7.42324	0.0407576	VASP_48.vasp	-7.38249	-7.43135	0.0488598
VASP_293.vasp	-7.39741	-7.44154	0.0441304	VASP_293.vasp	-7.39741	-7.3815	0.0159178
VASP_198.vasp	-7.38249	-7.42329	0.0408038	VASP_198.vasp	-7.38249	-7.43138	0.0488975
VASP_122.vasp	-7.39742	-7.44155	0.044134	VASP_122.vasp	-7.39742	-7.3815	0.0159167
VASP_32.vasp	-7.39742	-7.44154	0.0441203	VASP_32.vasp	-7.39742	-7.38149	0.0159257
VASP_297.vasp	-7.38249	-7.42327	0.0407877	VASP_297.vasp	-7.38249	-7.43137	0.0488846
VASP_21.vasp	-7.38249	-7.42329	0.0408038	VASP_21.vasp	-7.38249	-7.43138	0.0488978
VASP_31.vasp	-7.38249	-7.42321	0.0407256	VASP_31.vasp	-7.38249	-7.43132	0.0488292
VASP_40.vasp	-7.38249	-7.42328	0.0407903	VASP_40.vasp	-7.38249	-7.43137	0.0488849
VASP_179.vasp	-7.38249	-7.42325	0.0407591	VASP_179.vasp	-7.38249	-7.43135	0.0488588
VASP_229.vasp	-7.38249	-7.42331	0.0408195	VASP_229.vasp	-7.38249	-7.43139	0.0489079
VASP_44.vasp	-7.38249	-7.42327	0.0407885	VASP_44.vasp	-7.38249	-7.43137	0.0488837
VASP_199.vasp	-7.38249	-7.42324	0.0407576	VASP_199.vasp	-7.38249	-7.43135	0.0488598
VASP_191.vasp	-7.38249	-7.42327	0.0407885	VASP_191.vasp	-7.38249	-7.43137	0.0488837
VASP_223.vasp	-7.39741	-7.44154	0.0441304	VASP_223.vasp	-7.39741	-7.3815	0.0159178
VASP_254.vasp	-7.38249	-7.42328	0.0407903	VASP_254.vasp	-7.38249	-7.43137	0.0488863
VASP_120.vasp	-7.38249	-7.42324	0.0407579	VASP_120.vasp	-7.38249	-7.43134	0.048857
VASP_194.vasp	-7.37603	-7.40442	0.0283944	VASP_194.vasp	-7.37603	-7.47681	0.100779
VASP_299.vasp	-7.39742	-7.44154	0.0441203	VASP_299.vasp	-7.39742	-7.38149	0.0159257
VASP_189.vasp	-7.38249	-7.42328	0.0407942	VASP_189.vasp	-7.38249	-7.43138	0.0488883
VASP_277.vasp	-7.38249	-7.42325	0.0407605	VASP_277.vasp	-7.38249	-7.43135	0.0488622
VASP_116.vasp	-7.37603	-7.4044	0.0283759	VASP_116.vasp	-7.37603	-7.47681	0.100783
VASP_118.vasp	-7.39741	-7.44154	0.0441304	VASP_118.vasp	-7.39741	-7.3815	0.0159178
VASP_162.vasp	-7.38249	-7.42327	0.0407863	VASP_162.vasp	-7.38249	-7.43137	0.0488821
VASP_151.vasp	-7.38249	-7.42329	0.0408077	VASP_151.vasp	-7.38249	-7.43139	0.0488992
VASP_11.vasp	-7.38249	-7.42329	0.0407993	VASP_11.vasp	-7.38249	-7.43138	0.0488933
VASP_195.vasp	-7.37603	-7.40442	0.0283944	VASP_195.vasp	-7.37603	-7.47681	0.100779
VASP_220.vasp	-7.3913	-7.43972	0.0484244	VASP_220.vasp	-7.3913	-7.37733	0.0139668
VASP_202.vasp	-7.38249	-7.42331	0.0408206	VASP_202.vasp	-7.38249	-7.4314	0.048911
VASP_17.vasp	-7.38249	-7.42327	0.0407819	VASP_17.vasp	-7.38249	-7.43136	0.0488765
VASP_190.vasp	-7.38249	-7.42331	0.040823	VASP_190.vasp	-7.38249	-7.4314	0.0489126
VASP_36.vasp	-7.37603	-7.4044	0.0283745	VASP_36.vasp	-7.37603	-7.47681	0.100783
VASP_169.vasp	-7.37603	-7.4044	0.0283697	VASP_169.vasp	-7.37603	-7.47681	0.100782
VASP_291.vasp	-7.3913	-7.43973	0.048425	VASP_291.vasp	-7.3913	-7.37734	0.0139642
VASP_256.vasp	-7.38249	-7.42331	0.0408195	VASP_256.vasp	-7.38249	-7.43139	0.0489079
VASP_219.vasp	-7.39742	-7.44157	0.0441529	VASP_219.vasp	-7.39742	-7.38152	0.0158956
VASP_242.vasp	-7.39742	-7.44156	0.0441456	VASP_242.vasp	-7.39742	-7.38151	0.0159018
VASP_213.vasp	-7.3913	-7.43972	0.048421	VASP_213.vasp	-7.3913	-7.37733	0.0139704
VASP_215.vasp	-7.3913	-7.43972	0.048421	VASP_215.vasp	-7.3913	-7.37733	0.0139704
VASP_123.vasp	-7.37603	-7.4044	0.0283759	VASP_123.vasp	-7.37603	-7.47681	0.100783
VASP_208.vasp	-7.38249	-7.42327	0.0407802	VASP_208.vasp	-7.38249	-7.43136	0.0488745
VASP_141.vasp	-7.3913	-7.43973	0.0484255	VASP_141.vasp	-7.3913	-7.37733	0.0139665
VASP_172.vasp	-7.39742	-7.44154	0.0441203	VASP_172.vasp	-7.39742	-7.38149	0.0159257
VASP_39.vasp	-7.3913	-7.43973	0.0484317	VASP_39.vasp	-7.3913	-7.37734	0.0139581
VASP_113.vasp	-7.38249	-7.42328	0.0407903	VASP_113.vasp	-7.38249	-7.43137	0.0488863
VASP_150.vasp	-7.38249	-7.4233	0.0408123	VASP_150.vasp	-7.38249	-7.43139	0.0489022
VASP_144.vasp	-7.3913	-7.43972	0.0484205	VASP_144.vasp	-7.3913	-7.37733	0.0139684
VASP_273.vasp	-7.38249	-7.42328	0.0407903	VASP_273.vasp	-7.38249	-7.43137	0.0488863
VASP_49.vasp	-7.38249	-7.42324	0.0407576	VASP_49.vasp	-7.38249	-7.43135	0.0488598
VASP_255.vasp	-7.38249	-7.42327	0.0407826	VASP_255.vasp	-7.38249	-7.43137	0.0488803
VASP_230.vasp	-7.38249	-7.42328	0.0407903	VASP_230.vasp	-7.38249	-7.43137	0.0488849
VASP_204.vasp	-7.38249	-7.42331	0.0408184	VASP_204.vasp	-7.38249	-7.43139	0.0489074
VASP_16.vasp	-7.38249	-7.42331	0.0408195	VASP_16.vasp	-7.38249	-7.43139	0.0489079
VASP_110.vasp	-7.38249	-7.42324	0.0407576	VASP_110.vasp	-7.38249	-7.43135	0.0488598
VASP_160.vasp	-7.38249	-7.42326	0.0407718	VASP_160.vasp	-7.38249	-7.43136	0.0488698
VASP_13.vasp	-7.37603	-7.40442	0.0283944	VASP_13.vasp	-7.37603	-7.47681	0.100779
VASP_186.vasp	-7.38249	-7.42327	0.0407885	VASP_186.vasp	-7.38249	-7.43137	0.0488837
VASP_241.vasp	-7.37603	-7.4044	0.0283697	VASP_241.vasp	-7.37603	-7.47681	0.100781
VASP_143.vasp	-7.38249	-7.42324	0.0407562	VASP_143.vasp	-7.38249	-7.43134	0.0488553
VASP_24.vasp	-7.38249	-7.42329	0.0408077	VASP_24.vasp	-7.38249	-7.43139	0.0488992
VASP_289.vasp	-7.38249	-7.4233	0.0408181	VASP_289.vasp	-7.38249	-7.4314	0.0489088
VASP_227.vasp	-7.38249	-7.42324	0.0407562	VASP_227.vasp	-7.38249	-7.43134	0.0488553
VASP_168.vasp	-7.38249	-7.42327	0.0407877	VASP_168.vasp	-7.38249	-7.43137	0.0488846
VASP_66.vasp	-7.39742	-7.44157	0.0441529	VASP_66.vasp	-7.39742	-7.38152	0.0158956
VASP_54.vasp	-7.3913	-7.43973	0.0484317	VASP_54.vasp	-7.3913	-7.37734	0.0139581
VASP_240.vasp	-7.38249	-7.42327	0.0407882	VASP_240.vasp	-7.38249	-7.43137	0.0488848
VASP_111.vasp	-7.39742	-7.44154	0.0441281	VASP_111.vasp	-7.39742	-7.3815	0.015919
VASP_286.vasp	-7.38249	-7.42331	0.0408206	VASP_286.vasp	-7.38249	-7.4314	0.048911
VASP_264.vasp	-7.3913	-7.43973	0.0484261	VASP_264.vasp	-7.3913	-7.37734	0.0139628
VASP_288.vasp	-7.38249	-7.42328	0.0407939	VASP_288.vasp	-7.38249	-7.43138	0.0488908
VASP_45.vasp	-7.38249	-7.42329	0.0408038	VASP_45.vasp	-7.38249	-7.43138	0.0488978
VASP_104.vasp	-7.38249	-7.42329	0.040804	VASP_104.vasp	-7.38249	-7.43138	0.0488975
VASP_161.vasp	-7.39741	-7.44154	0.0441304	VASP_161.vasp	-7.39741	-7.3815	0.0159178
VASP_283.vasp	-7.37603	-7.40439	0.0283663	VASP_283.vasp	-7.37603	-7.47679	0.100763
VASP_138.vasp	-7.3913	-7.43973	0.0484317	VASP_138.vasp	-7.3913	-7.37734	0.0139581
VASP_280.vasp	-7.38249	-7.42329	0.0408038	VASP_280.vasp	-7.38249	-7.43138	0.0488975
VASP_247.vasp	-7.38249	-7.42327	0.0407838	VASP_247.vasp	-7.38249	-7.43137	0.0488793
VASP_130.vasp	-7.3913	-7.43972	0.0484233	VASP_130.vasp	-7.3913	-7.37733	0.0139659
VASP_105.vasp	-7.38249	-7.4233	0.0408123	VASP_105.vasp	-7.38249	-7.43139	0.0489022
VASP_270.vasp	-7.38249	-7.42324	0.0407535	VASP_270.vasp	-7.38249	-7.43134	0.0488563
VASP_178.vasp	-7.3913	-7.43973	0.0484261	VASP_178.vasp	-7.3913	-7.37734	0.0139628
VASP_238.vasp	-7.38249	-7.42325	0.0407591	VASP_238.vasp	-7.38249	-7.43135	0.0488588
VASP_249.vasp	-7.38249	-7.42324	0.0407535	VASP_249.vasp	-7.38249	-7.43134	0.0488563
VASP_155.vasp	-7.3913	-7.43973	0.0484317	VASP_155.vasp	-7.3913	-7.37734	0.0139581
VASP_200.vasp	-7.39741	-7.44154	0.0441304	VASP_200.vasp	-7.39741	-7.3815	0.0159178
VASP_258.vasp	-7.37603	-7.40442	0.0283944	VASP_258.vasp	-7.37603	-7.47681	0.100779
VASP_167.vasp	-7.38249	-7.42325	0.0407591	VASP_167.vasp	-7.38249	-7.43135	0.0488588
VASP_287.vasp	-7.38249	-7.42325	0.0407688	VASP_287.vasp	-7.38249	-7.43135	0.0488668
VASP_147.vasp	-7.3913	-7.43973	0.0484255	VASP_147.vasp	-7.3913	-7.37733	0.0139665
VASP_157.vasp	-7.38249	-7.42326	0.0407719	VASP_157.vasp	-7.38249	-7.43135	0.0488688
VASP_109.vasp	-7.38249	-7.4233	0.0408181	VASP_109.vasp	-7.38249	-7.4314	0.0489088
VASP_174.vasp	-7.38249	-7.4233	0.0408181	VASP_174.vasp	-7.38249	-7.4314	0.0489088
VASP_211.vasp	-7.38249	-7.42321	0.040727	VASP_211.vasp	-7.38249	-7.43132	0.0488301
VASP_15.vasp	-7.38249	-7.42328	0.0407942	VASP_15.vasp	-7.38249	-7.43138	0.0488883
VASP_10.vasp	-7.38249	-7.42327	0.0407885	VASP_10.vasp	-7.38249	-7.43137	0.0488837
VASP_140.vasp	-7.37603	-7.4044	0.0283745	VASP_140.vasp	-7.37603	-7.47681	0.100783
VASP_193.vasp	-7.3913	-7.43972	0.048421	VASP_193.vasp	-7.3913	-7.37733	0.0139704
VASP_47.vasp	-7.3913	-7.43973	0.0484255	VASP_47.vasp	-7.3913	-7.37733	0.0139665
VASP_226.vasp	-7.38249	-7.42327	0.0407838	VASP_226.vasp	-7.38249	-7.43137	0.0488793
VASP_135.vasp	-7.38249	-7.42327	0.0407819	VASP_135.vasp	-7.38249	-7.43136	0.0488765
VASP_209.vasp	-7.38249	-7.42329	0.0408077	VASP_209.vasp	-7.38249	-7.43139	0.0488992
VASP_170.vasp	-7.38249	-7.42324	0.0407568	VASP_170.vasp	-7.38249	-7.43134	0.0488573
VASP_159.vasp	-7.3913	-7.43972	0.0484233	VASP_159.vasp	-7.3913	-7.37733	0.0139659
VASP_292.vasp	-7.3913	-7.43973	0.048425	VASP_292.vasp	-7.3913	-7.37734	0.0139642
VASP_156.vasp	-7.3913	-7.43972	0.0484205	VASP_156.vasp	-7.3913	-7.37733	0.0139684
VASP_281.vasp	-7.39741	-7.44154	0.0441299	VASP_281.vasp	-7.39741	-7.3815	0.015915
VASP_101.vasp	-7.3913	-7.43973	0.0484261	VASP_101.vasp	-7.3913	-7.37734	0.0139628
VASP_298.vasp	-7.38249	-7.42324	0.0407535	VASP_298.vasp	-7.38249	-7.43134	0.0488563
VASP_233.vasp	-7.38249	-7.4233	0.0408123	VASP_233.vasp	-7.38249	-7.43139	0.0489022
VASP_142.vasp	-7.38249	-7.4233	0.0408181	VASP_142.vasp	-7.38249	-7.4314	0.0489088
VASP_131.vasp	-7.38249	-7.42327	0.0407803	VASP_131.vasp	-7.38249	-7.43136	0.0488778
VASP_222.vasp	-7.38249	-7.42325	0.0407591	VASP_222.vasp	-7.38249	-7.43135	0.0488588
VASP_266.vasp	-7.38249	-7.42324	0.040759	VASP_266.vasp	-7.38249	-7.43134	0.0488576
VASP_285.vasp	-7.37603	-7.4044	0.0283692	VASP_285.vasp	-7.37603	-7.47681	0.100781
VASP_206.vasp	-7.38249	-7.42325	0.0407602	VASP_206.vasp	-7.38249	-7.43135	0.0488622
VASP_207.vasp	-7.38249	-7.42324	0.0407579	VASP_207.vasp	-7.38249	-7.43134	0.048857
VASP_126.vasp	-7.38249	-7.42328	0.0407903	VASP_126.vasp	-7.38249	-7.43137	0.0488863
VASP_7.vasp	-7.38249	-7.4233	0.0408181	VASP_7.vasp	-7.38249	-7.4314	0.0489088
VASP_296.vasp	-7.38249	-7.42331	0.0408184	VASP_296.vasp	-7.38249	-7.43139	0.0489074
VASP_107.vasp	-7.38249	-7.42331	0.0408206	VASP_107.vasp	-7.38249	-7.4314	0.0489091
VASP_6.vasp	-7.38249	-7.42327	0.0407838	VASP_6.vasp	-7.38249	-7.43137	0.0488793
VASP_176.vasp	-7.38249	-7.4233	0.0408181	VASP_176.vasp	-7.38249	-7.43139	0.0489074
VASP_269.vasp	-7.38249	-7.42324	0.0407568	VASP_269.vasp	-7.38249	-7.43134	0.0488573
VASP_218.vasp	-7.38249	-7.42323	0.0407422	VASP_218.vasp	-7.38249	-7.43133	0.0488447
VASP_3.vasp	-7.38249	-7.42323	0.0407391	VASP_3.vasp	-7.38249	-7.43133	0.0488427
VASP_2.vasp	-7.38249	-7.42327	0.0407877	VASP_2.vasp	-7.38249	-7.43137	0.0488846
VASP_133.vasp	-7.39742	-7.44156	0.0441456	VASP_133.vasp	-7.39742	-7.38151	0.0159018
VASP_228.vasp	-7.3913	-7.43972	0.0484205	VASP_228.vasp	-7.3913	-7.37733	0.0139684
VASP_205.vasp	-7.38249	-7.42327	0.0407877	VASP_205.vasp	-7.38249	-7.43137	0.0488846
VASP_224.vasp	-7.38249	-7.42324	0.0407579	VASP_224.vasp	-7.38249	-7.43134	0.048857
VASP_188.vasp	-7.39742	-7.44154	0.0441281	VASP_188.vasp	-7.39742	-7.3815	0.0159179
VASP_243.vasp	-7.3913	-7.43973	0.0484317	VASP_243.vasp	-7.3913	-7.37734	0.0139581
VASP_180.vasp	-7.38249	-7.42326	0.0407719	VASP_180.vasp	-7.38249	-7.43135	0.0488688
VASP_108.vasp	-7.38249	-7.42321	0.0407256	VASP_108.vasp	-7.38249	-7.43132	0.0488292
VASP_152.vasp	-7.38249	-7.42324	0.0407565	VASP_152.vasp	-7.38249	-7.43134	0.0488548
VASP_192.vasp	-7.38249	-7.42327	0.0407877	VASP_192.vasp	-7.38249	-7.43137	0.0488846
VASP_59.vasp	-7.38249	-7.42324	0.0407562	VASP_59.vasp	-7.38249	-7.43134	0.0488559
VASP_177.vasp	-7.38249	-7.4233	0.0408178	VASP_177.vasp	-7.38249	-7.4314	0.0489091
VASP_29.vasp	-7.38249	-7.42327	0.0407819	VASP_29.vasp	-7.38249	-7.43136	0.0488765
VASP_117.vasp	-7.37603	-7.40441	0.028379	VASP_117.vasp	-7.37603	-7.4768	0.100774
VASP_65.vasp	-7.3913	-7.43973	0.0484261	VASP_65.vasp	-7.3913	-7.37734	0.0139628
VASP_132.vasp	-7.37603	-7.40442	0.0283947	VASP_132.vasp	-7.37603	-7.47681	0.100779
VASP_166.vasp	-7.38249	-7.4233	0.0408178	VASP_166.vasp	-7.38249	-7.4314	0.0489088
VASP_43.vasp	-7.38249	-7.42328	0.0407942	VASP_43.vasp	-7.38249	-7.43138	0.0488883
VASP_38.vasp	-7.3913	-7.43972	0.048421	VASP_38.vasp	-7.3913	-7.37733	0.0139704
VASP_265.vasp	-7.38249	-7.42329	0.0408038	VASP_265.vasp	-7.38249	-7.43138	0.0488978
VASP_282.vasp	-7.38249	-7.42327	0.0407819	VASP_282.vasp	-7.38249	-7.43136	0.0488765
VASP_244.vasp	-7.38249	-7.42331	0.0408195	VASP_244.vasp	-7.38249	-7.43139	0.0489079
VASP_278.vasp	-7.38249	-7.4233	0.0408181	VASP_278.vasp	-7.38249	-7.4314	0.0489088
VASP_102.vasp	-7.38249	-7.42327	0.0407803	VASP_102.vasp	-7.38249	-7.43136	0.0488778
VASP_112.vasp	-7.3913	-7.43973	0.0484255	VASP_112.vasp	-7.3913	-7.37733	0.0139665
VASP_37.vasp	-7.38249	-7.42324	0.0407535	VASP_37.vasp	-7.38249	-7.43134	0.0488563
VASP_187.vasp	-7.3913	-7.43973	0.0484255	VASP_187.vasp	-7.3913	-7.37733	0.0139665
VASP_173.vasp	-7.38249	-7.42325	0.0407602	VASP_173.vasp	-7.38249	-7.43135	0.0488622
VASP_235.vasp	-7.3913	-7.43973	0.0484261	VASP_235.vasp	-7.3913	-7.37734	0.0139628
VASP_214.vasp	-7.39741	-7.44154	0.0441304	VASP_214.vasp	-7.39741	-7.3815	0.0159178
VASP_20.vasp	-7.38249	-7.42329	0.0408038	VASP_20.vasp	-7.38249	-7.43138	0.0488978
VASP_149.vasp	-7.38249	-7.42325	0.0407685	VASP_149.vasp	-7.38249	-7.43135	0.0488668

## Sheet: Swaps-LiCoO2
structure	DFT Total energy/atom	DIEP Total energy/atom	DIEP Abs(error)	structure	DFT Total energy/atom	M3GNET Total energy/atom	M3GNET Abs(error)
gen_mp-22526_LiCoO2_primitive_4_4_2_34_3.vasp	-6.21891	-6.16429	0.0546194	gen_mp-22526_LiCoO2_primitive_4_4_2_34_3.vasp	-6.21891	-6.10468	0.114225
gen_mp-22526_LiCoO2_primitive_4_4_2_14_3.vasp	-6.2189	-6.16458	0.054321	gen_mp-22526_LiCoO2_primitive_4_4_2_14_3.vasp	-6.2189	-6.10491	0.113993
gen_mp-22526_LiCoO2_primitive_4_4_2_49_3.vasp	-6.21901	-6.16399	0.0550188	gen_mp-22526_LiCoO2_primitive_4_4_2_49_3.vasp	-6.21901	-6.10448	0.11453
gen_mp-22526_LiCoO2_primitive_4_4_2_40_3.vasp	-6.21891	-6.16429	0.0546193	gen_mp-22526_LiCoO2_primitive_4_4_2_40_3.vasp	-6.21891	-6.10467	0.114235
gen_mp-22526_LiCoO2_primitive_4_4_2_23_3.vasp	-6.21898	-6.16412	0.0548668	gen_mp-22526_LiCoO2_primitive_4_4_2_23_3.vasp	-6.21898	-6.10478	0.114203
gen_mp-22526_LiCoO2_primitive_4_4_2_45_3.vasp	-6.21866	-6.16504	0.0536132	gen_mp-22526_LiCoO2_primitive_4_4_2_45_3.vasp	-6.21866	-6.10485	0.11381
gen_mp-22526_LiCoO2_primitive_4_4_2_36_3.vasp	-6.21864	-6.1665	0.0521421	gen_mp-22526_LiCoO2_primitive_4_4_2_36_3.vasp	-6.21864	-6.10736	0.111278
gen_mp-22526_LiCoO2_primitive_4_4_2_11_3.vasp	-6.21769	-6.16832	0.049378	gen_mp-22526_LiCoO2_primitive_4_4_2_11_3.vasp	-6.21769	-6.1093	0.108396
gen_mp-22526_LiCoO2_primitive_4_4_2_43_3.vasp	-6.21809	-6.1658	0.052294	gen_mp-22526_LiCoO2_primitive_4_4_2_43_3.vasp	-6.21809	-6.10687	0.111223
gen_mp-22526_LiCoO2_primitive_4_4_2_15_3.vasp	-6.21855	-6.16682	0.0517311	gen_mp-22526_LiCoO2_primitive_4_4_2_15_3.vasp	-6.21855	-6.10773	0.110823
gen_mp-22526_LiCoO2_primitive_4_4_2_33_3.vasp	-6.21887	-6.16441	0.054464	gen_mp-22526_LiCoO2_primitive_4_4_2_33_3.vasp	-6.21887	-6.10496	0.113916
gen_mp-22526_LiCoO2_primitive_4_4_2_26_3.vasp	-6.21832	-6.16435	0.0539786	gen_mp-22526_LiCoO2_primitive_4_4_2_26_3.vasp	-6.21832	-6.10482	0.1135
gen_mp-22526_LiCoO2_primitive_4_4_2_44_3.vasp	-6.21855	-6.16649	0.0520632	gen_mp-22526_LiCoO2_primitive_4_4_2_44_3.vasp	-6.21855	-6.10744	0.111117
gen_mp-22526_LiCoO2_primitive_4_4_2_8_3.vasp	-6.21848	-6.1674	0.0510804	gen_mp-22526_LiCoO2_primitive_4_4_2_8_3.vasp	-6.21848	-6.108	0.110477
gen_mp-22526_LiCoO2_primitive_4_4_2_21_3.vasp	-6.21882	-6.16447	0.0543527	gen_mp-22526_LiCoO2_primitive_4_4_2_21_3.vasp	-6.21882	-6.10471	0.114117
gen_mp-22526_LiCoO2_primitive_4_4_2_4_3.vasp	-6.21886	-6.16475	0.0541149	gen_mp-22526_LiCoO2_primitive_4_4_2_4_3.vasp	-6.21886	-6.10516	0.113698
gen_mp-22526_LiCoO2_primitive_4_4_2_13_3.vasp	-6.21849	-6.16671	0.0517811	gen_mp-22526_LiCoO2_primitive_4_4_2_13_3.vasp	-6.21849	-6.10747	0.111026
gen_mp-22526_LiCoO2_primitive_4_4_2_42_3.vasp	-6.21853	-6.16695	0.0515841	gen_mp-22526_LiCoO2_primitive_4_4_2_42_3.vasp	-6.21853	-6.10755	0.110985
gen_mp-22526_LiCoO2_primitive_4_4_2_20_3.vasp	-6.21794	-6.16615	0.0517943	gen_mp-22526_LiCoO2_primitive_4_4_2_20_3.vasp	-6.21794	-6.1069	0.11104
gen_mp-22526_LiCoO2_primitive_4_4_2_48_3.vasp	-6.21853	-6.16358	0.0549542	gen_mp-22526_LiCoO2_primitive_4_4_2_48_3.vasp	-6.21853	-6.1045	0.114031
gen_mp-22526_LiCoO2_primitive_4_4_2_5_3.vasp	-6.21641	-6.16955	0.0468594	gen_mp-22526_LiCoO2_primitive_4_4_2_5_3.vasp	-6.21641	-6.11111	0.105291
gen_mp-22526_LiCoO2_primitive_4_4_2_31_3.vasp	-6.21881	-6.16453	0.0542711	gen_mp-22526_LiCoO2_primitive_4_4_2_31_3.vasp	-6.21881	-6.10478	0.114026
gen_mp-22526_LiCoO2_primitive_4_4_2_16_3.vasp	-6.21849	-6.1671	0.0513919	gen_mp-22526_LiCoO2_primitive_4_4_2_16_3.vasp	-6.21849	-6.10763	0.110857
gen_mp-22526_LiCoO2_primitive_4_4_2_18_3.vasp	-6.21769	-6.16848	0.0492126	gen_mp-22526_LiCoO2_primitive_4_4_2_18_3.vasp	-6.21769	-6.10925	0.108441
gen_mp-22526_LiCoO2_primitive_4_4_2_24_3.vasp	-6.2181	-6.1666	0.0515023	gen_mp-22526_LiCoO2_primitive_4_4_2_24_3.vasp	-6.2181	-6.10765	0.110451
gen_mp-22526_LiCoO2_primitive_4_4_2_12_3.vasp	-6.21886	-6.16452	0.0543381	gen_mp-22526_LiCoO2_primitive_4_4_2_12_3.vasp	-6.21886	-6.10484	0.114019
gen_mp-22526_LiCoO2_primitive_4_4_2_3_3.vasp	-6.21847	-6.16694	0.0515263	gen_mp-22526_LiCoO2_primitive_4_4_2_3_3.vasp	-6.21847	-6.10776	0.110707
gen_mp-22526_LiCoO2_primitive_4_4_2_38_3.vasp	-6.21842	-6.16352	0.0549008	gen_mp-22526_LiCoO2_primitive_4_4_2_38_3.vasp	-6.21842	-6.10411	0.114309
gen_mp-22526_LiCoO2_primitive_4_4_2_9_3.vasp	-6.21794	-6.16615	0.0517841	gen_mp-22526_LiCoO2_primitive_4_4_2_9_3.vasp	-6.21794	-6.10692	0.111022
gen_mp-22526_LiCoO2_primitive_4_4_2_28_3.vasp	-6.21813	-6.16636	0.0517682	gen_mp-22526_LiCoO2_primitive_4_4_2_28_3.vasp	-6.21813	-6.10742	0.110709
gen_mp-22526_LiCoO2_primitive_4_4_2_6_3.vasp	-6.21852	-6.16706	0.0514638	gen_mp-22526_LiCoO2_primitive_4_4_2_6_3.vasp	-6.21852	-6.10784	0.110685
gen_mp-22526_LiCoO2_primitive_4_4_2_51_3.vasp	-6.2186	-6.16347	0.0551291	gen_mp-22526_LiCoO2_primitive_4_4_2_51_3.vasp	-6.2186	-6.10444	0.114155
gen_mp-22526_LiCoO2_primitive_4_4_2_7_3.vasp	-6.21847	-6.16735	0.051118	gen_mp-22526_LiCoO2_primitive_4_4_2_7_3.vasp	-6.21847	-6.1078	0.11067
gen_mp-22526_LiCoO2_primitive_4_4_2_39_3.vasp	-6.21894	-6.16402	0.0549249	gen_mp-22526_LiCoO2_primitive_4_4_2_39_3.vasp	-6.21894	-6.10464	0.114301
gen_mp-22526_LiCoO2_primitive_4_4_2_46_3.vasp	-6.21888	-6.16426	0.0546201	gen_mp-22526_LiCoO2_primitive_4_4_2_46_3.vasp	-6.21888	-6.10468	0.114203
gen_mp-22526_LiCoO2_primitive_4_4_2_25_3.vasp	-6.21809	-6.16652	0.0515653	gen_mp-22526_LiCoO2_primitive_4_4_2_25_3.vasp	-6.21809	-6.10746	0.11063
gen_mp-22526_LiCoO2_primitive_4_4_2_52_3.vasp	-6.21797	-6.16354	0.0544377	gen_mp-22526_LiCoO2_primitive_4_4_2_52_3.vasp	-6.21797	-6.10464	0.113331
gen_mp-22526_LiCoO2_primitive_4_4_2_0_3.vasp	-6.21859	-6.16721	0.0513748	gen_mp-22526_LiCoO2_primitive_4_4_2_0_3.vasp	-6.21859	-6.10806	0.110531
gen_mp-22526_LiCoO2_primitive_4_4_2_27_3.vasp	-6.2185	-6.16378	0.0547184	gen_mp-22526_LiCoO2_primitive_4_4_2_27_3.vasp	-6.2185	-6.10478	0.11372
gen_mp-22526_LiCoO2_primitive_4_4_2_50_3.vasp	-6.21841	-6.16352	0.0548964	gen_mp-22526_LiCoO2_primitive_4_4_2_50_3.vasp	-6.21841	-6.10414	0.114277
gen_mp-22526_LiCoO2_primitive_4_4_2_29_3.vasp	-6.21854	-6.16385	0.0546885	gen_mp-22526_LiCoO2_primitive_4_4_2_29_3.vasp	-6.21854	-6.10493	0.11361
gen_mp-22526_LiCoO2_primitive_4_4_2_19_3.vasp	-6.21895	-6.16434	0.0546119	gen_mp-22526_LiCoO2_primitive_4_4_2_19_3.vasp	-6.21895	-6.10499	0.113961
gen_mp-22526_LiCoO2_primitive_4_4_2_30_3.vasp	-6.21819	-6.16425	0.0539399	gen_mp-22526_LiCoO2_primitive_4_4_2_30_3.vasp	-6.21819	-6.10445	0.113738
gen_mp-22526_LiCoO2_primitive_4_4_2_1_3.vasp	-6.21886	-6.16476	0.0541083	gen_mp-22526_LiCoO2_primitive_4_4_2_1_3.vasp	-6.21886	-6.10519	0.113678
gen_mp-22526_LiCoO2_primitive_4_4_2_41_3.vasp	-6.21775	-6.16869	0.0490653	gen_mp-22526_LiCoO2_primitive_4_4_2_41_3.vasp	-6.21775	-6.1099	0.107853
gen_mp-22526_LiCoO2_primitive_4_4_2_47_3.vasp	-6.21858	-6.16329	0.0552919	gen_mp-22526_LiCoO2_primitive_4_4_2_47_3.vasp	-6.21858	-6.10371	0.11487
gen_mp-22526_LiCoO2_primitive_4_4_2_32_3.vasp	-6.21793	-6.16609	0.0518323	gen_mp-22526_LiCoO2_primitive_4_4_2_32_3.vasp	-6.21793	-6.10685	0.111076
gen_mp-22526_LiCoO2_primitive_4_4_2_22_3.vasp	-6.2181	-6.16588	0.0522209	gen_mp-22526_LiCoO2_primitive_4_4_2_22_3.vasp	-6.2181	-6.10691	0.111191
gen_mp-22526_LiCoO2_primitive_4_4_2_17_3.vasp	-6.21902	-6.16419	0.0548308	gen_mp-22526_LiCoO2_primitive_4_4_2_17_3.vasp	-6.21902	-6.105	0.114021
gen_mp-22526_LiCoO2_primitive_4_4_2_37_3.vasp	-6.21898	-6.16435	0.0546228	gen_mp-22526_LiCoO2_primitive_4_4_2_37_3.vasp	-6.21898	-6.10505	0.113924
gen_mp-22526_LiCoO2_primitive_4_4_2_35_3.vasp	-6.21904	-6.16395	0.0550917	gen_mp-22526_LiCoO2_primitive_4_4_2_35_3.vasp	-6.21904	-6.10472	0.114323
gen_mp-22526_LiCoO2_primitive_4_4_2_10_3.vasp	-6.21892	-6.16427	0.0546518	gen_mp-22526_LiCoO2_primitive_4_4_2_10_3.vasp	-6.21892	-6.10486	0.114064
gen_mp-22526_LiCoO2_primitive_4_4_2_2_3.vasp	-6.21776	-6.16893	0.0488357	gen_mp-22526_LiCoO2_primitive_4_4_2_2_3.vasp	-6.21776	-6.10995	0.107809

## Sheet: Swaps-LiAlO2
structure	DFT Total energy/atom	DIEP Total energy/atom	DIEP Abs(error)	structure	DFT Total energy/atom	M3GNET Total energy/atom	M3GNET Abs(error)
gen_mp-8001_LiAlO2_primitive_4_4_2_34_3.vasp	-6.60986	-6.70551	0.0956467	gen_mp-8001_LiAlO2_primitive_4_4_2_34_3.vasp	-6.60986	-6.59766	0.0121991
gen_mp-8001_LiAlO2_primitive_4_4_2_19_3.vasp	-6.60993	-6.70538	0.0954468	gen_mp-8001_LiAlO2_primitive_4_4_2_19_3.vasp	-6.60993	-6.59757	0.0123615
gen_mp-8001_LiAlO2_primitive_4_4_2_4_3.vasp	-6.60973	-6.70603	0.0962978	gen_mp-8001_LiAlO2_primitive_4_4_2_4_3.vasp	-6.60973	-6.59784	0.0118917
gen_mp-8001_LiAlO2_primitive_4_4_2_38_3.vasp	-6.60939	-6.70447	0.0950825	gen_mp-8001_LiAlO2_primitive_4_4_2_38_3.vasp	-6.60939	-6.59625	0.0131426
gen_mp-8001_LiAlO2_primitive_4_4_2_45_3.vasp	-6.60917	-6.70673	0.0975575	gen_mp-8001_LiAlO2_primitive_4_4_2_45_3.vasp	-6.60917	-6.59752	0.0116547
gen_mp-8001_LiAlO2_primitive_4_4_2_33_3.vasp	-6.60979	-6.70565	0.0958534	gen_mp-8001_LiAlO2_primitive_4_4_2_33_3.vasp	-6.60979	-6.59779	0.0119976
gen_mp-8001_LiAlO2_primitive_4_4_2_16_3.vasp	-6.60938	-6.70707	0.097694	gen_mp-8001_LiAlO2_primitive_4_4_2_16_3.vasp	-6.60938	-6.5995	0.00987558
gen_mp-8001_LiAlO2_primitive_4_4_2_43_3.vasp	-6.60905	-6.70531	0.0962575	gen_mp-8001_LiAlO2_primitive_4_4_2_43_3.vasp	-6.60905	-6.59839	0.0106647
gen_mp-8001_LiAlO2_primitive_4_4_2_50_3.vasp	-6.60942	-6.70433	0.0949143	gen_mp-8001_LiAlO2_primitive_4_4_2_50_3.vasp	-6.60942	-6.59628	0.0131371
gen_mp-8001_LiAlO2_primitive_4_4_2_27_3.vasp	-6.60977	-6.70472	0.0949458	gen_mp-8001_LiAlO2_primitive_4_4_2_27_3.vasp	-6.60977	-6.59715	0.0126206
gen_mp-8001_LiAlO2_primitive_4_4_2_15_3.vasp	-6.6095	-6.70659	0.0970824	gen_mp-8001_LiAlO2_primitive_4_4_2_15_3.vasp	-6.6095	-6.59969	0.00980974
gen_mp-8001_LiAlO2_primitive_4_4_2_0_3.vasp	-6.60929	-6.70712	0.097834	gen_mp-8001_LiAlO2_primitive_4_4_2_0_3.vasp	-6.60929	-6.59984	0.00944907
gen_mp-8001_LiAlO2_primitive_4_4_2_35_3.vasp	-6.60994	-6.70512	0.0951776	gen_mp-8001_LiAlO2_primitive_4_4_2_35_3.vasp	-6.60994	-6.59742	0.0125229
gen_mp-8001_LiAlO2_primitive_4_4_2_37_3.vasp	-6.60958	-6.70596	0.0963866	gen_mp-8001_LiAlO2_primitive_4_4_2_37_3.vasp	-6.60958	-6.5978	0.0117705
gen_mp-8001_LiAlO2_primitive_4_4_2_1_3.vasp	-6.60973	-6.70607	0.0963374	gen_mp-8001_LiAlO2_primitive_4_4_2_1_3.vasp	-6.60973	-6.59792	0.0118087
gen_mp-8001_LiAlO2_primitive_4_4_2_31_3.vasp	-6.60998	-6.70557	0.0955875	gen_mp-8001_LiAlO2_primitive_4_4_2_31_3.vasp	-6.60998	-6.59799	0.0119896
gen_mp-8001_LiAlO2_primitive_4_4_2_11_3.vasp	-6.60858	-6.70676	0.0981827	gen_mp-8001_LiAlO2_primitive_4_4_2_11_3.vasp	-6.60858	-6.60031	0.00826976
gen_mp-8001_LiAlO2_primitive_4_4_2_2_3.vasp	-6.6085	-6.70767	0.0991687	gen_mp-8001_LiAlO2_primitive_4_4_2_2_3.vasp	-6.6085	-6.60064	0.00786707
gen_mp-8001_LiAlO2_primitive_4_4_2_20_3.vasp	-6.60886	-6.70583	0.0969672	gen_mp-8001_LiAlO2_primitive_4_4_2_20_3.vasp	-6.60886	-6.59837	0.0104881
gen_mp-8001_LiAlO2_primitive_4_4_2_46_3.vasp	-6.6097	-6.70552	0.095812	gen_mp-8001_LiAlO2_primitive_4_4_2_46_3.vasp	-6.6097	-6.59739	0.0123171
gen_mp-8001_LiAlO2_primitive_4_4_2_26_3.vasp	-6.6093	-6.7057	0.0964003	gen_mp-8001_LiAlO2_primitive_4_4_2_26_3.vasp	-6.6093	-6.59713	0.0121755
gen_mp-8001_LiAlO2_primitive_4_4_2_14_3.vasp	-6.60978	-6.70575	0.0959626	gen_mp-8001_LiAlO2_primitive_4_4_2_14_3.vasp	-6.60978	-6.59772	0.0120642
gen_mp-8001_LiAlO2_primitive_4_4_2_47_3.vasp	-6.60967	-6.70408	0.0944169	gen_mp-8001_LiAlO2_primitive_4_4_2_47_3.vasp	-6.60967	-6.59603	0.0136402
gen_mp-8001_LiAlO2_primitive_4_4_2_25_3.vasp	-6.60956	-6.70594	0.0963805	gen_mp-8001_LiAlO2_primitive_4_4_2_25_3.vasp	-6.60956	-6.59933	0.0102324
gen_mp-8001_LiAlO2_primitive_4_4_2_21_3.vasp	-6.60982	-6.7056	0.0957763	gen_mp-8001_LiAlO2_primitive_4_4_2_21_3.vasp	-6.60982	-6.59748	0.0123363
gen_mp-8001_LiAlO2_primitive_4_4_2_10_3.vasp	-6.61005	-6.70523	0.095181	gen_mp-8001_LiAlO2_primitive_4_4_2_10_3.vasp	-6.61005	-6.59761	0.0124439
gen_mp-8001_LiAlO2_primitive_4_4_2_40_3.vasp	-6.60986	-6.70541	0.0955496	gen_mp-8001_LiAlO2_primitive_4_4_2_40_3.vasp	-6.60986	-6.59758	0.0122825
gen_mp-8001_LiAlO2_primitive_4_4_2_44_3.vasp	-6.6095	-6.70626	0.096767	gen_mp-8001_LiAlO2_primitive_4_4_2_44_3.vasp	-6.6095	-6.5997	0.00979605
gen_mp-8001_LiAlO2_primitive_4_4_2_52_3.vasp	-6.60943	-6.70444	0.095011	gen_mp-8001_LiAlO2_primitive_4_4_2_52_3.vasp	-6.60943	-6.59686	0.012565
gen_mp-8001_LiAlO2_primitive_4_4_2_30_3.vasp	-6.60894	-6.70545	0.096508	gen_mp-8001_LiAlO2_primitive_4_4_2_30_3.vasp	-6.60894	-6.5966	0.0123433
gen_mp-8001_LiAlO2_primitive_4_4_2_29_3.vasp	-6.60965	-6.70487	0.0952281	gen_mp-8001_LiAlO2_primitive_4_4_2_29_3.vasp	-6.60965	-6.59715	0.0125004
gen_mp-8001_LiAlO2_primitive_4_4_2_42_3.vasp	-6.60911	-6.70707	0.0979674	gen_mp-8001_LiAlO2_primitive_4_4_2_42_3.vasp	-6.60911	-6.59945	0.00965733
gen_mp-8001_LiAlO2_primitive_4_4_2_39_3.vasp	-6.61014	-6.7049	0.0947512	gen_mp-8001_LiAlO2_primitive_4_4_2_39_3.vasp	-6.61014	-6.59753	0.0126182
gen_mp-8001_LiAlO2_primitive_4_4_2_5_3.vasp	-6.60808	-6.70788	0.0997999	gen_mp-8001_LiAlO2_primitive_4_4_2_5_3.vasp	-6.60808	-6.60178	0.00630111
gen_mp-8001_LiAlO2_primitive_4_4_2_13_3.vasp	-6.60961	-6.70637	0.096764	gen_mp-8001_LiAlO2_primitive_4_4_2_13_3.vasp	-6.60961	-6.59977	0.009837
gen_mp-8001_LiAlO2_primitive_4_4_2_17_3.vasp	-6.60986	-6.70542	0.0955634	gen_mp-8001_LiAlO2_primitive_4_4_2_17_3.vasp	-6.60986	-6.59754	0.0123115
gen_mp-8001_LiAlO2_primitive_4_4_2_48_3.vasp	-6.60988	-6.70435	0.0944743	gen_mp-8001_LiAlO2_primitive_4_4_2_48_3.vasp	-6.60988	-6.59697	0.0129135
gen_mp-8001_LiAlO2_primitive_4_4_2_23_3.vasp	-6.61	-6.70514	0.0951427	gen_mp-8001_LiAlO2_primitive_4_4_2_23_3.vasp	-6.61	-6.59755	0.0124504
gen_mp-8001_LiAlO2_primitive_4_4_2_18_3.vasp	-6.60861	-6.70668	0.0980727	gen_mp-8001_LiAlO2_primitive_4_4_2_18_3.vasp	-6.60861	-6.60029	0.00832174
gen_mp-8001_LiAlO2_primitive_4_4_2_24_3.vasp	-6.60926	-6.70615	0.0968888	gen_mp-8001_LiAlO2_primitive_4_4_2_24_3.vasp	-6.60926	-6.59936	0.00989644
gen_mp-8001_LiAlO2_primitive_4_4_2_3_3.vasp	-6.60958	-6.70659	0.0970116	gen_mp-8001_LiAlO2_primitive_4_4_2_3_3.vasp	-6.60958	-6.59985	0.00972819
gen_mp-8001_LiAlO2_primitive_4_4_2_6_3.vasp	-6.60936	-6.70697	0.097612	gen_mp-8001_LiAlO2_primitive_4_4_2_6_3.vasp	-6.60936	-6.59974	0.00962097
gen_mp-8001_LiAlO2_primitive_4_4_2_36_3.vasp	-6.60947	-6.70618	0.0967127	gen_mp-8001_LiAlO2_primitive_4_4_2_36_3.vasp	-6.60947	-6.59955	0.00992454
gen_mp-8001_LiAlO2_primitive_4_4_2_12_3.vasp	-6.60966	-6.70581	0.0961461	gen_mp-8001_LiAlO2_primitive_4_4_2_12_3.vasp	-6.60966	-6.59738	0.0122799
gen_mp-8001_LiAlO2_primitive_4_4_2_49_3.vasp	-6.61013	-6.70486	0.0947334	gen_mp-8001_LiAlO2_primitive_4_4_2_49_3.vasp	-6.61013	-6.59741	0.0127214
gen_mp-8001_LiAlO2_primitive_4_4_2_28_3.vasp	-6.60931	-6.70584	0.0965232	gen_mp-8001_LiAlO2_primitive_4_4_2_28_3.vasp	-6.60931	-6.59923	0.0100839
gen_mp-8001_LiAlO2_primitive_4_4_2_8_3.vasp	-6.609	-6.70774	0.0987419	gen_mp-8001_LiAlO2_primitive_4_4_2_8_3.vasp	-6.609	-6.59976	0.009241
gen_mp-8001_LiAlO2_primitive_4_4_2_32_3.vasp	-6.60887	-6.70569	0.0968254	gen_mp-8001_LiAlO2_primitive_4_4_2_32_3.vasp	-6.60887	-6.59834	0.0105256
gen_mp-8001_LiAlO2_primitive_4_4_2_22_3.vasp	-6.6091	-6.70526	0.0961599	gen_mp-8001_LiAlO2_primitive_4_4_2_22_3.vasp	-6.6091	-6.59836	0.0107366
gen_mp-8001_LiAlO2_primitive_4_4_2_7_3.vasp	-6.6093	-6.70739	0.098089	gen_mp-8001_LiAlO2_primitive_4_4_2_7_3.vasp	-6.6093	-6.59966	0.00964506
gen_mp-8001_LiAlO2_primitive_4_4_2_9_3.vasp	-6.60886	-6.70581	0.0969442	gen_mp-8001_LiAlO2_primitive_4_4_2_9_3.vasp	-6.60886	-6.59836	0.0104993
gen_mp-8001_LiAlO2_primitive_4_4_2_41_3.vasp	-6.60845	-6.70766	0.0992077	gen_mp-8001_LiAlO2_primitive_4_4_2_41_3.vasp	-6.60845	-6.60064	0.0078171
gen_mp-8001_LiAlO2_primitive_4_4_2_51_3.vasp	-6.60979	-6.70422	0.0944318	gen_mp-8001_LiAlO2_primitive_4_4_2_51_3.vasp	-6.60979	-6.59682	0.0129681

[truncated: 7 more sheets: Swaps-LiFePO4, H_interstitial-Metals, H_interstitial-Perovskites, Hn_interstitial-Zn, Hn_interstitial-Pt, Hn_interstitial-Fe, Hn_interstitial-Ni]
